# Supplementary material for: DFT study of the mechanism of hydrogen evolution catalysed by molecular Ni, Co and Fe catalysts containing a diamine–tripyridine ligand
Source: Royal Society of Chemistry journal article supplement (doi:10.1039/c6ra20721a), 2016-01-01
Supplement: c6ra20721a1.pdf [file c6ra20721a1.pdf]

Supporting Information to

**DFT study of the mechanism of hydrogen evolution catalysed  
by molecular Ni, Co and Fe catalysts containing a  
diamine-tripyridine ligand**

*Ke Ye, Ying-Ying Li, Rong-Zhen Liao\**

**Table of contents**

- S1. Overlaid structure of **1-H<sub>2</sub>O** from geometry optimization and from crystal structure.
- S2. Structures of **1** with the square pyramidal structure.
- S3. Structures of **1** in the protonated form.
- S4. Structures of **2<sub>dp</sub>-H<sub>2</sub>O**.
- S5. Structures of **2** (Ni<sup>I</sup> HNPY).
- S6. Structures of **2** (Ni<sup>III</sup>-H).
- S7. Structure of **1'-H<sub>2</sub>O**.
- S8. Structure of **2'<sub>dp</sub>**.
- S9. Structure of **2'<sub>dp</sub>-H<sub>2</sub>O**.
- S10. Structures of **1'<sub>pt</sub>**.
- S11. Structures of **2'(Co<sup>I</sup> HNPY)**.
- S12. Structures of **3'<sub>dp</sub>**.
- S13. Structure of **1''-H<sub>2</sub>O**.
- S14. Structures of **1''<sub>pt</sub>**.
- S15. Structures of **2''(Fe<sup>I</sup> HNPY)**.
- S16. Structures of **2''(Fe<sup>III</sup>-H)**.
- S17. Structures of **2''<sub>dp</sub>-H<sub>2</sub>O**.
- S18. Cartesian coordinates for all optimized structures.

**S1. Overlaid structure of 1-H<sub>2</sub>O from geometry optimization and from crystal structure.**

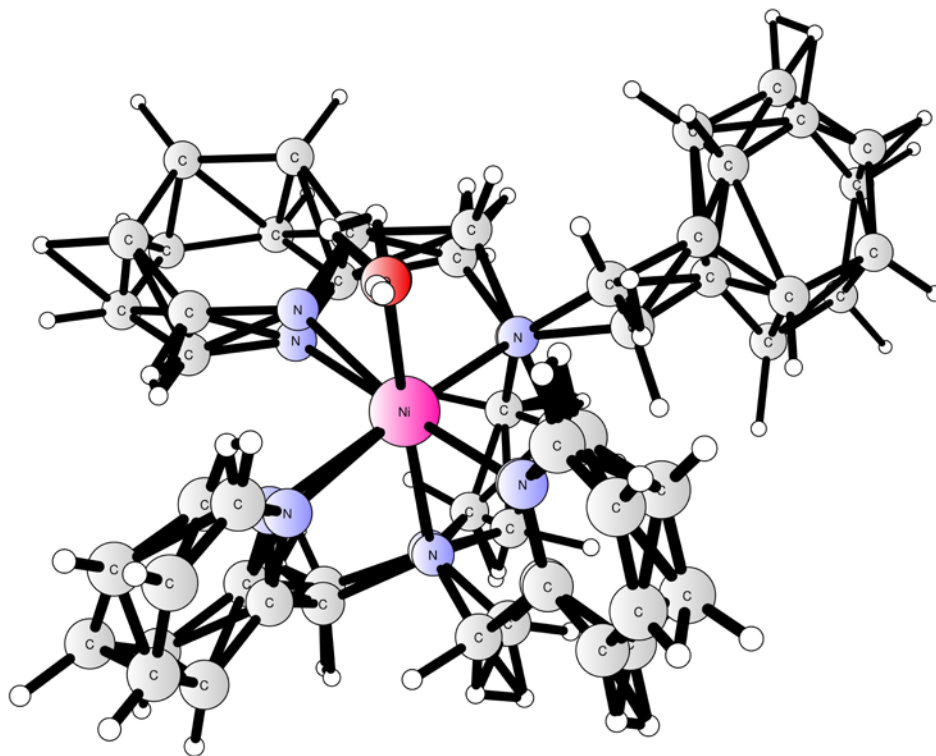

*Fig. S1 Overlaid structure of 1-H<sub>2</sub>O from geometry optimization and from crystal structure.*

Ni

## S2. Structures of **1** with the square pyramidal structure.

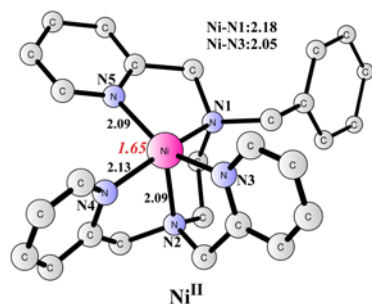

Fig. S2 Optimized isomers of **1** with the square pyramidal structure. Distances are given in Ångstroms. For clarity, unimportant hydrogen atoms are not shown. Spin density on Ni is shown in red italic.

## S3. Structures of **1** in the protonated form.

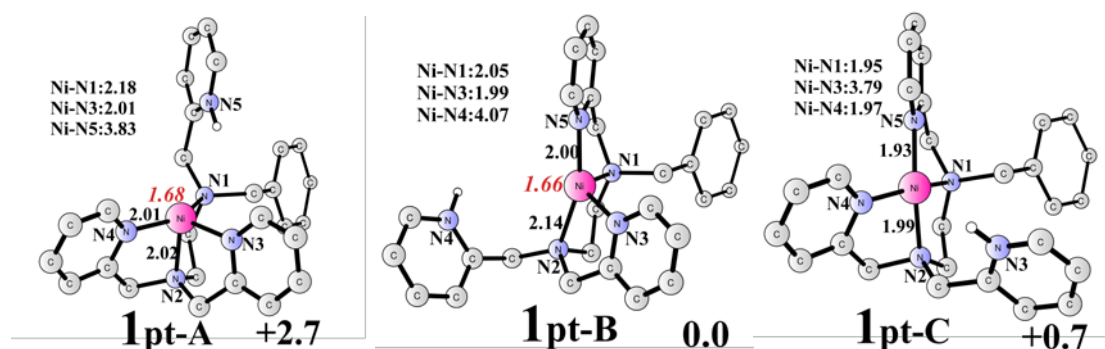

Fig. S3 Optimized isomers of **1<sub>pt</sub>**. Distances are given in Ångstroms. For clarity, unimportant hydrogen atoms are not shown. Spin densities on Ni are shown in red italic. Energies of **1<sub>pt-A</sub>** and **1<sub>pt-C</sub>** are given relative to **1<sub>pt-B</sub>**.

Table S1. Relative energies (in kcal mol<sup>-1</sup>) of different spin states of the three isomers.

|         | <b>1<sub>pt-A</sub></b> | <b>1<sub>pt-B</sub></b> | <b>1<sub>pt-C</sub></b> |
|---------|-------------------------|-------------------------|-------------------------|
| singlet | +26.5                   | +5.2                    | +0.7                    |
| triplet | +2.7                    | 0.0                     | +3.3                    |
| quintet | +76.6                   | +75.1                   | +76.4                   |

## S4. Structures of $2_{dp}\text{-H}_2\text{O}$ .

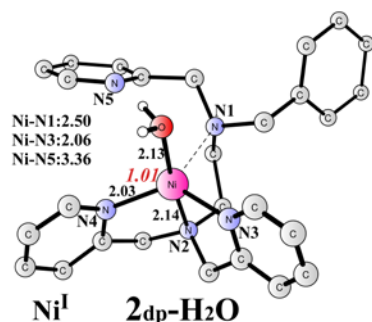

Fig. S4 Optimized structure of  $2_{dp}\text{-H}_2\text{O}$ . Distances are given in Ångstroms. For clarity, unimportant hydrogen atoms are not shown. Spin density on Ni is shown in red italic. For  $2_{dp}\text{-H}_2\text{O}$  the doublet state is the ground state, and the quartet state is 15.4 kcal mol<sup>-1</sup> higher.

## S5. Structures of $2(\text{Ni}^I \text{HNPY})$ .

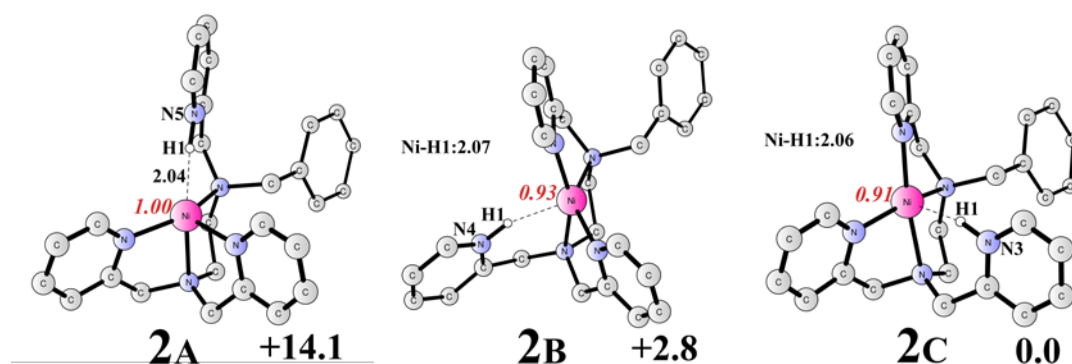

Fig. S5 Optimized isomers of  $2(\text{Ni}^I \text{HNPY})$ . Distances are given in Ångstroms. For clarity, unimportant hydrogen atoms are not shown. Spin densities on Ni are shown in red italic. Energies of  $2_{\text{A}}$  and  $2_{\text{B}}$  are given relative to  $2_{\text{C}}$ .

Table S2. Relative energies (in kcal mol<sup>-1</sup>) of different spin states of the three isomers.

|         | $2_{\text{A}}$ | $2_{\text{B}}$ | $2_{\text{C}}$ |
|---------|----------------|----------------|----------------|
| doublet | +14.1          | +2.8           | 0.0            |
| quartet | +47.0          | +15.7          | +16.8          |

## S6. Structures of $2(\text{Ni}^{\text{III}}\text{-H})$ .

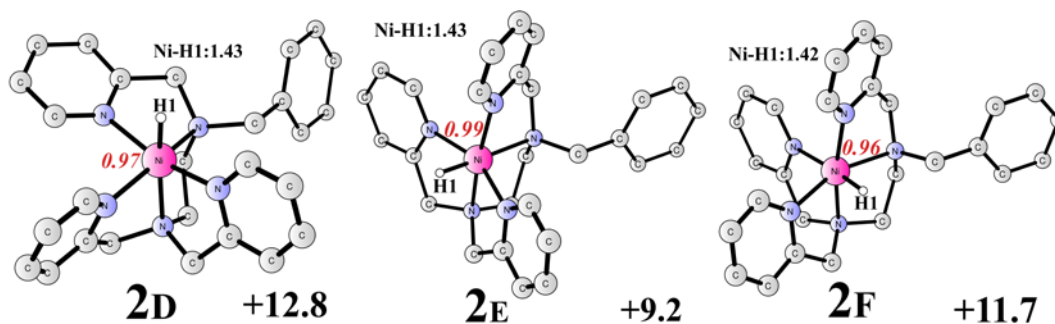

Fig. S6 Optimized isomers of  $2(\text{Ni}^{\text{III}}\text{-H})$ . Distances are given in Ångstroms. For clarity, unimportant hydrogen atoms are not shown. Spin densities on Ni are shown in red italic. Energies of  $2_{\text{D}}$ ,  $2_{\text{E}}$  and  $2_{\text{F}}$  are given relative to  $2_{\text{C}}$ .

Table S3. Relative energies (in  $\text{kcal mol}^{-1}$ ) of different spin states of the three isomers.

|         | $2_{\text{D}}$ | $2_{\text{E}}$ | $2_{\text{F}}$ |
|---------|----------------|----------------|----------------|
| doublet | +12.8          | +9.2           | +11.7          |
| quartet | +37.0          | +35.5          | +35.7          |

Co

### S7. Structure of 1'-H<sub>2</sub>O.

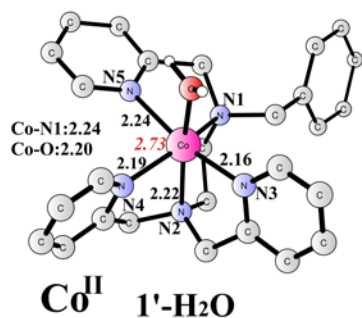

Fig. S7 Optimized structure of 1'-H<sub>2</sub>O. Distances are given in Ångstroms. For clarity, unimportant hydrogen atoms are not shown. Spin density on Co is shown in red italic. For 1'-H<sub>2</sub>O the quartet state is the ground state, and the doublet state is 9.6 kcal mol<sup>-1</sup> higher.

### S8. Structure of 2'<sub>dp</sub>.

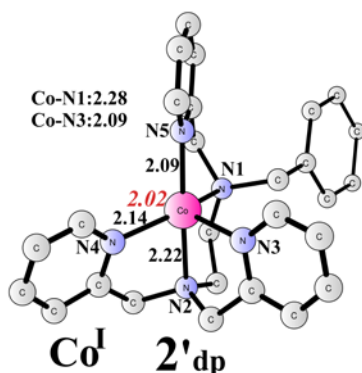

Fig. S8 Optimized structure of 2'<sub>dp</sub>. Distances are given in Ångstroms. For clarity, unimportant hydrogen atoms are not shown. Spin density on Co is shown in red italic. For 2'<sub>dp</sub> the triplet state is the ground state, and the singlet state is 17.7 kcal mol<sup>-1</sup> higher.

## S9. Structure of $2'_{dp}\text{-H}_2\text{O}$ .

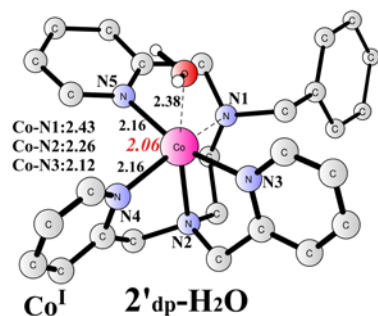

Fig. S9 Optimized structure of  $2'_{dp}\text{-H}_2\text{O}$ . Distances are given in Ångstroms. For clarity, unimportant hydrogen atoms are not shown. Spin density on Co is shown in red italic. For  $2'_{dp}\text{-H}_2\text{O}$  the triplet state is the ground state, and the singlet state is 18.2 kcal mol<sup>-1</sup> higher.

## S10. Structures of $1'_{pt}$ .

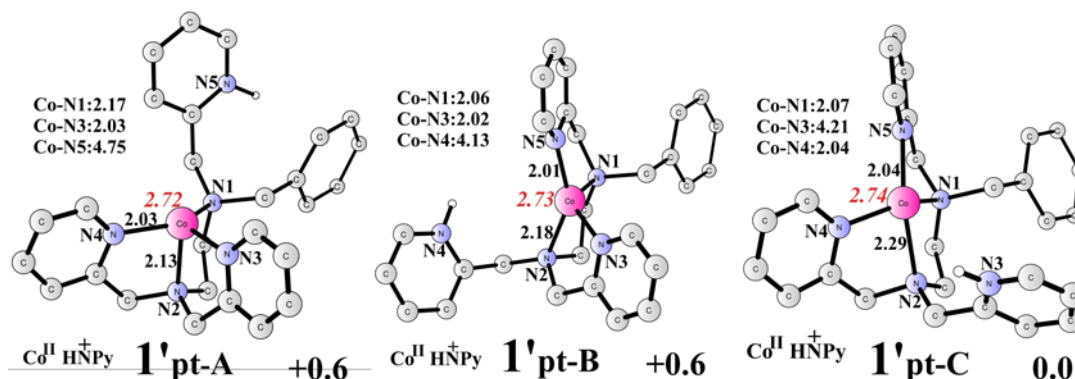

Fig. S10 Optimized isomers of  $1'_{pt}$ . Distances are given in Ångstroms. For clarity, unimportant hydrogen atoms are not shown. Spin densities on Co are shown in red italic. Energies of  $1'_{pt-A}$  and  $1'_{pt-B}$  are given relative to  $1'_{pt-C}$ .

Table S4. Relative energies (in kcal mol<sup>-1</sup>) of different spin states of the three isomers.

|         | $1'_{pt-A}$ | $1'_{pt-B}$ | $1'_{pt-C}$ |
|---------|-------------|-------------|-------------|
| doublet | +17.5       | +10.5       | +1.5        |
| quartet | +0.6        | +0.6        | 0.0         |

## S11. Structures of 2'(Co<sup>I</sup> HNPY).

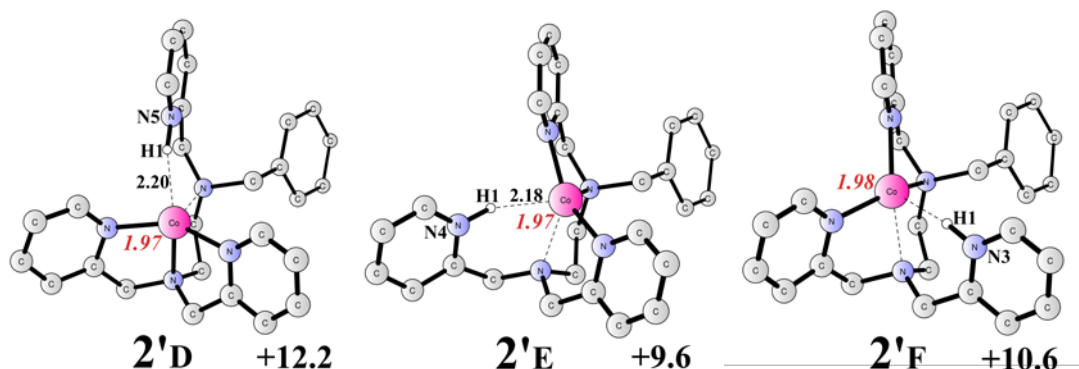

Fig. S11 Optimized isomers of 2'. Distances are given in Ångstroms. For clarity, unimportant hydrogen atoms are not shown. Spin densities on Co are shown in red italic. Energies of 2'<sub>D</sub>, 2'<sub>E</sub> and 2'<sub>F</sub> are given relative to 2'<sub>B</sub>.

Table S4. Relative energies (in kcal mol<sup>-1</sup>) of different spin states of the three isomers.

|         | 2' <sub>D</sub> | 2' <sub>E</sub> | 2' <sub>F</sub> |
|---------|-----------------|-----------------|-----------------|
| singlet | +29.9           | +19.1           | +16.5           |
| triplet | +12.2           | +9.6            | +10.6           |

## S12. Structures of 3'<sub>dp</sub>.

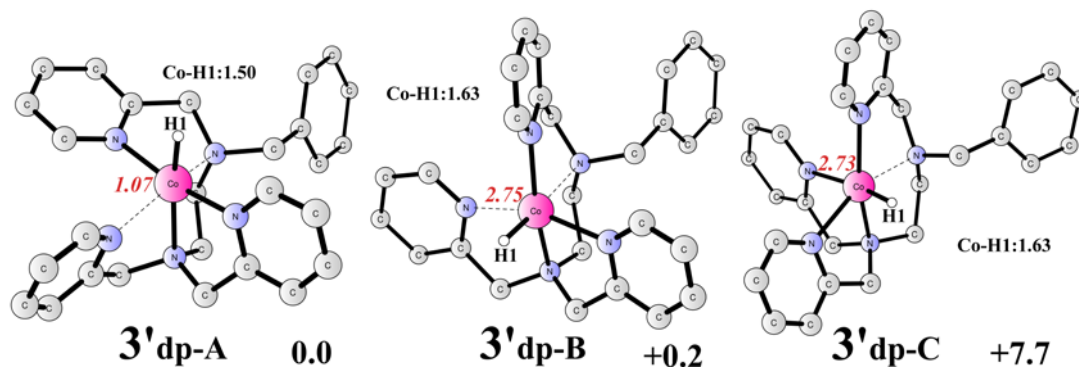

Fig. S12 Optimized isomers of 3'<sub>dp</sub>. Distances are given in Ångstroms. For clarity, unimportant hydrogen atoms are not shown. Spin densities on Co are shown in red italic. Energies of 3'<sub>dp-B</sub> and 3'<sub>dp-C</sub> are given relative to 3'<sub>dp-A</sub>.

Table S4. Relative energies (in kcal mol<sup>-1</sup>) of different spin states of the three isomers.

|         | 3' <sub>dp-A</sub> | 3' <sub>dp-B</sub> | 3' <sub>dp-C</sub> |
|---------|--------------------|--------------------|--------------------|
| doublet | 0.0                | +0.8               | +7.8               |
| quartet | +5.2               | +0.2               | +7.7               |



Fe

### S13. Structure of $1''\text{-H}_2\text{O}$ .

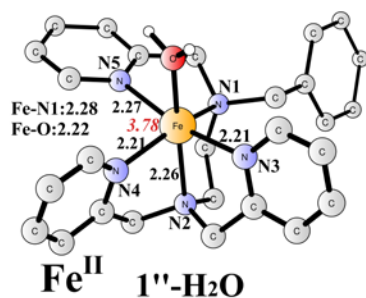

Fig. S13 Optimized structure of  $1''\text{-H}_2\text{O}$ . Distances are given in Ångstroms. For clarity, unimportant hydrogen atoms are not shown. Spin density on Fe is shown in red italic. For  $1''\text{-H}_2\text{O}$  the quintet state is the ground state, and the singlet state and triplet are 15.6 and 15.3 kcal mol<sup>-1</sup> higher.

### S14. Structures of $1''_{\text{pt}}$ .

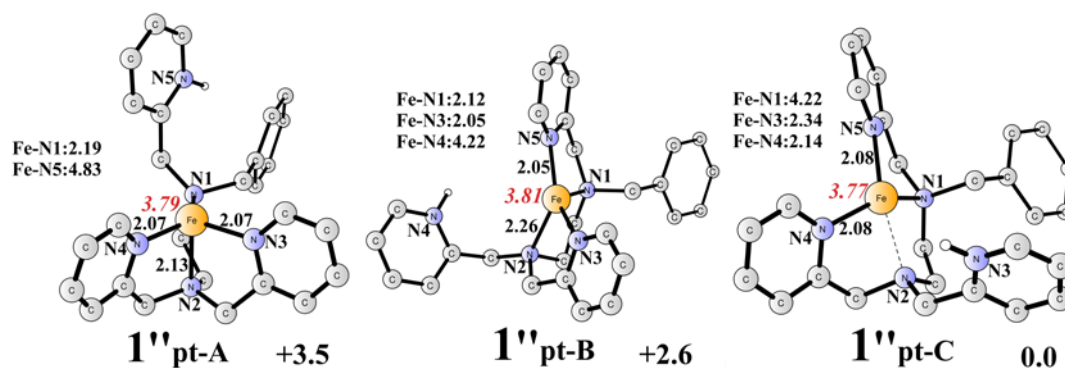

Fig. S14 Optimized isomers of  $1''_{\text{pt}}$ . Distances are given in Ångstroms. For clarity, unimportant hydrogen atoms are not shown. Spin densities on Fe are shown in red italic. Energies of  $1''_{\text{pt-A}}$  and  $1''_{\text{pt-B}}$  are given relative to  $1''_{\text{pt-C}}$ .

Table S5. Relative energies (in kcal mol<sup>-1</sup>) of different spin states of the three isomers.

|         | $1''_{\text{pt-A}}$ | $1''_{\text{pt-B}}$ | $1''_{\text{pt-C}}$ |
|---------|---------------------|---------------------|---------------------|
| singlet | +31.8               | +27.3               | +30.5               |
| triplet | +24.0               | +17.5               | +11.7               |
| quintet | +3.5                | +2.6                | 0.0                 |

### S15. Structures of $2''(\text{Fe}^{\text{I}} \text{HNPpy})$ .

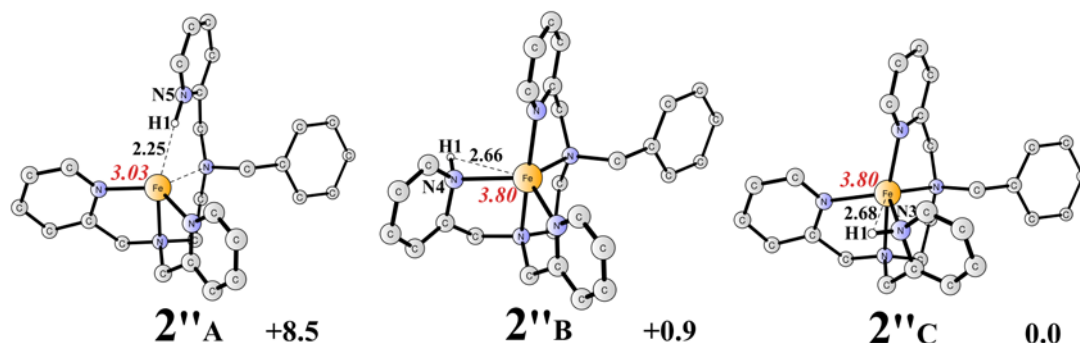

Fig. S15 Optimized isomers of  $2''$  ( $\text{Fe}^{\text{I}} \text{HNPpy}$ ). Distances are given in Ångstroms. For clarity, unimportant hydrogen atoms are not shown. Spin densities on Fe are shown in red italic. Energies of  $2''_{\text{A}}$  and  $2''_{\text{B}}$  are given relative to  $2''_{\text{C}}$ .

Table S6. Relative energies (in  $\text{kcal mol}^{-1}$ ) of different spin states of the three isomers.

|         | $2''_{\text{A}}$ | $2''_{\text{B}}$ | $2''_{\text{C}}$ |
|---------|------------------|------------------|------------------|
| doublet | +35.0            | +24.8            | +17.4            |
| quartet | +8.5             | +6.2             | +6.6             |
| sextet  | +11.8            | +0.9             | 0.0              |

### S16. Structures of $2''(\text{Fe}^{\text{III}}-\text{H})$ .

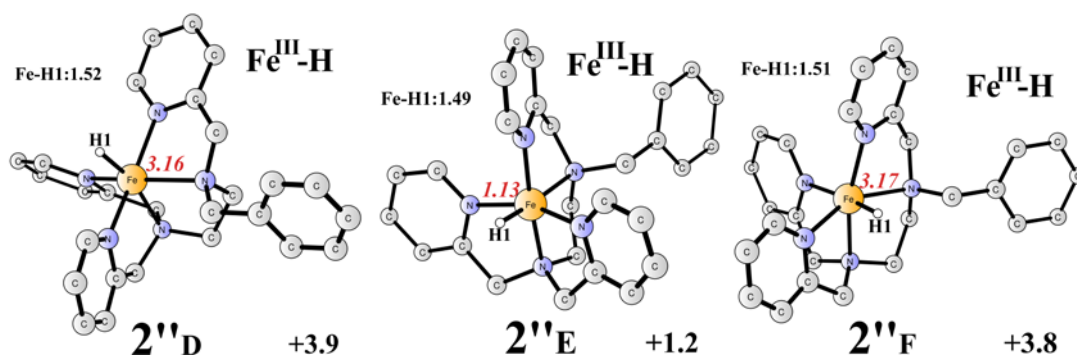

Fig. S16 Optimized isomers of  $2''$  ( $\text{Fe}^{\text{III}}-\text{H}$ ). Distances are given in Ångstroms. For clarity, unimportant hydrogen atoms are not shown. Spin densities on Fe are shown in red italic. Energies of  $2''_{\text{D}}$ ,  $2''_{\text{E}}$  and  $2''_{\text{F}}$  are given relative to  $2''_{\text{C}}$ .

Table S7. Relative energies (in  $\text{kcal mol}^{-1}$ ) of different spin states of the three isomers.

|         | $2''_{\text{D}}$ | $2''_{\text{E}}$ | $2''_{\text{F}}$ |
|---------|------------------|------------------|------------------|
| doublet | +4.3             | +1.2             | +5.0             |
| quartet | +3.9             | +4.5             | +3.8             |
| sextet  | +8.4             | +10.0            | +13.0            |

## S17. Structures of $2''_{dp}\text{-H}_2\text{O}$

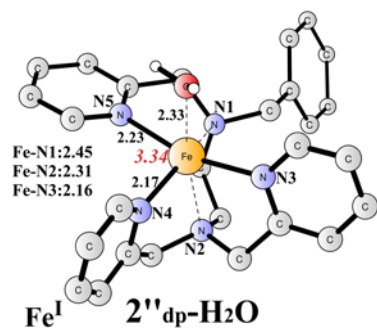

Fig. S17 Optimized structure of  $2''_{dp}\text{-H}_2\text{O}$ . Distances are given in Ångstroms. For clarity, unimportant hydrogen atoms are not shown. Spin density on Fe is shown in red italic. For  $2''_{dp}\text{-H}_2\text{O}$  the quartet state is the ground state, and the doublet 14.2 kcal mol<sup>-1</sup> higher.

## S18. Cartesian coordinates for all optimized structures.

### Ni

1-H<sub>2</sub>O (triplet) E(B3LYP/ SDD-6-31G(d,p))= -1567.13337251 hartree

| Center<br>Number | Atomic<br>Number | Atomic<br>Type | Coordinates (Angstroms) |           |           |
|------------------|------------------|----------------|-------------------------|-----------|-----------|
|                  |                  |                | X                       | Y         | Z         |
| 1                | 7                | 0              | 0.834259                | -0.761392 | 1.558946  |
| 2                | 6                | 0              | 1.943469                | 0.010226  | 2.165387  |
| 3                | 1                | 0              | 1.606139                | 1.043282  | 2.303430  |
| 4                | 1                | 0              | 2.216783                | -0.377542 | 3.155893  |
| 5                | 6                | 0              | 1.168369                | -2.211553 | 1.512404  |
| 6                | 1                | 0              | 2.256876                | -2.316853 | 1.476247  |
| 7                | 1                | 0              | 0.835979                | -2.717519 | 2.426731  |
| 8                | 6                | 0              | -0.499151               | -0.533872 | 2.188442  |
| 9                | 1                | 0              | -1.076160               | -1.453272 | 2.065645  |
| 10               | 1                | 0              | -0.399796               | -0.364411 | 3.267975  |
| 11               | 28               | 0              | 0.750696                | -0.041927 | -0.449528 |
| 12               | 6                | 0              | 3.144463                | -0.023602 | 1.234119  |
| 13               | 6                | 0              | 4.454065                | 0.046811  | 1.706411  |
| 14               | 6                | 0              | 3.889912                | -0.181882 | -0.960937 |
| 15               | 6                | 0              | 5.508828                | 0.008312  | 0.792879  |
| 16               | 1                | 0              | 4.644429                | 0.123072  | 2.772212  |
| 17               | 6                | 0              | 5.222921                | -0.114287 | -0.567456 |
| 18               | 1                | 0              | 3.621904                | -0.277982 | -2.008415 |
| 19               | 1                | 0              | 6.536152                | 0.060596  | 1.139180  |
| 20               | 1                | 0              | 6.012216                | -0.162370 | -1.309369 |
| 21               | 6                | 0              | 0.590693                | -2.883289 | 0.286610  |
| 22               | 6                | 0              | 0.310964                | -4.249698 | 0.265085  |
| 23               | 6                | 0              | -0.151272               | -4.830847 | -0.914633 |
| 24               | 1                | 0              | 0.456233                | -4.847225 | 1.159427  |
| 25               | 6                | 0              | -0.052764               | -2.665659 | -1.931187 |
| 26               | 6                | 0              | -0.337198               | -4.021874 | -2.036705 |
| 27               | 1                | 0              | -0.371221               | -5.892880 | -0.954787 |
| 28               | 1                | 0              | -0.220783               | -1.997964 | -2.769614 |
| 29               | 1                | 0              | -0.705905               | -4.427677 | -2.972109 |
| 30               | 7                | 0              | 2.868895                | -0.130533 | -0.086792 |
| 31               | 7                | 0              | 0.412680                | -2.101219 | -0.798938 |
| 32               | 6                | 0              | -1.239949               | 0.634253  | 1.543953  |
| 33               | 1                | 0              | -2.241364               | 0.721260  | 1.980994  |

|    |   |   |           |           |           |
|----|---|---|-----------|-----------|-----------|
| 34 | 1 | 0 | -0.715788 | 1.567966  | 1.760851  |
| 35 | 7 | 0 | -1.323275 | 0.486885  | 0.058017  |
| 36 | 6 | 0 | -1.581689 | 1.808299  | -0.559888 |
| 37 | 1 | 0 | -1.797036 | 1.640598  | -1.621914 |
| 38 | 1 | 0 | -2.470743 | 2.286490  | -0.132572 |
| 39 | 6 | 0 | -2.384882 | -0.507318 | -0.367282 |
| 40 | 1 | 0 | -2.277044 | -0.608544 | -1.450932 |
| 41 | 1 | 0 | -2.111112 | -1.468325 | 0.072001  |
| 42 | 6 | 0 | -3.816034 | -0.163965 | -0.011467 |
| 43 | 6 | 0 | -4.618836 | 0.572481  | -0.896314 |
| 44 | 6 | 0 | -4.379735 | -0.608720 | 1.194987  |
| 45 | 6 | 0 | -5.940383 | 0.880191  | -0.571958 |
| 46 | 1 | 0 | -4.219831 | 0.886763  | -1.858038 |
| 47 | 6 | 0 | -5.700555 | -0.300479 | 1.523123  |
| 48 | 1 | 0 | -3.793658 | -1.224891 | 1.873819  |
| 49 | 6 | 0 | -6.481091 | 0.449740  | 0.641618  |
| 50 | 1 | 0 | -6.551526 | 1.442313  | -1.271061 |
| 51 | 1 | 0 | -6.123567 | -0.657108 | 2.456961  |
| 52 | 1 | 0 | -7.511144 | 0.683273  | 0.891329  |
| 53 | 6 | 0 | -0.386008 | 2.724967  | -0.440168 |
| 54 | 6 | 0 | -0.531656 | 4.112965  | -0.450938 |
| 55 | 6 | 0 | 0.604061  | 4.918500  | -0.396462 |
| 56 | 1 | 0 | -1.523411 | 4.550618  | -0.501500 |
| 57 | 6 | 0 | 1.923064  | 2.921393  | -0.304654 |
| 58 | 6 | 0 | 1.858082  | 4.309497  | -0.322938 |
| 59 | 1 | 0 | 0.512589  | 5.999994  | -0.405642 |
| 60 | 1 | 0 | 2.877529  | 2.411731  | -0.243189 |
| 61 | 1 | 0 | 2.769324  | 4.895276  | -0.275261 |
| 62 | 7 | 0 | 0.827451  | 2.134555  | -0.362563 |
| 63 | 8 | 0 | 0.763580  | 0.331795  | -2.606681 |
| 64 | 1 | 0 | 1.217292  | -0.242326 | -3.239334 |
| 65 | 1 | 0 | 0.972317  | 1.241649  | -2.861590 |

-----  
**1-H<sub>2</sub>O** (singlet) E(B3LYP/ SDD-6-31G(d,p))= -1567.09332723 hartree  
 -----

| Center<br>Number | Atomic<br>Number | Atomic<br>Type | Coordinates (Angstroms) |           |           |
|------------------|------------------|----------------|-------------------------|-----------|-----------|
|                  |                  |                | X                       | Y         | Z         |
| 1                | 7                | 0              | -0.614494               | -0.918553 | -1.948118 |
| 2                | 6                | 0              | -1.786361               | -0.224819 | -2.488635 |
| 3                | 1                | 0              | -1.495595               | 0.803851  | -2.734290 |
| 4                | 1                | 0              | -2.162066               | -0.675876 | -3.419238 |
| 5                | 6                | 0              | -0.812712               | -2.344146 | -1.696825 |

|    |    |   |           |           |           |
|----|----|---|-----------|-----------|-----------|
| 6  | 1  | 0 | -1.839624 | -2.622609 | -1.963460 |
| 7  | 1  | 0 | -0.166507 | -2.962091 | -2.332778 |
| 8  | 6  | 0 | 0.716973  | -0.532389 | -2.442442 |
| 9  | 1  | 0 | 1.360460  | -1.413868 | -2.392014 |
| 10 | 1  | 0 | 0.693177  | -0.235249 | -3.500112 |
| 11 | 28 | 0 | -0.667314 | 0.166146  | 0.148448  |
| 12 | 6  | 0 | -2.910816 | -0.192114 | -1.460159 |
| 13 | 6  | 0 | -4.249880 | -0.326006 | -1.822015 |
| 14 | 6  | 0 | -3.511470 | 0.006739  | 0.802566  |
| 15 | 6  | 0 | -5.238680 | -0.282215 | -0.837600 |
| 16 | 1  | 0 | -4.511179 | -0.468429 | -2.865519 |
| 17 | 6  | 0 | -4.862861 | -0.118102 | 0.495598  |
| 18 | 1  | 0 | -3.156112 | 0.144009  | 1.821177  |
| 19 | 1  | 0 | -6.284741 | -0.384759 | -1.108537 |
| 20 | 1  | 0 | -5.599587 | -0.089475 | 1.290639  |
| 21 | 6  | 0 | -0.595778 | -2.725923 | -0.237385 |
| 22 | 6  | 0 | -0.477096 | -4.065289 | 0.139473  |
| 23 | 6  | 0 | -0.345341 | -4.390901 | 1.486477  |
| 24 | 1  | 0 | -0.491720 | -4.839692 | -0.621314 |
| 25 | 6  | 0 | -0.458525 | -2.051025 | 1.992954  |
| 26 | 6  | 0 | -0.343825 | -3.363130 | 2.432385  |
| 27 | 1  | 0 | -0.249488 | -5.427280 | 1.794370  |
| 28 | 1  | 0 | -0.485743 | -1.216597 | 2.687314  |
| 29 | 1  | 0 | -0.251814 | -3.571089 | 3.492552  |
| 30 | 7  | 0 | -2.563495 | -0.021686 | -0.157032 |
| 31 | 7  | 0 | -0.568210 | -1.740034 | 0.680756  |
| 32 | 6  | 0 | 1.347561  | 0.620468  | -1.646546 |
| 33 | 1  | 0 | 2.391631  | 0.750455  | -1.952047 |
| 34 | 1  | 0 | 0.825235  | 1.552202  | -1.873986 |
| 35 | 7  | 0 | 1.290434  | 0.432679  | -0.146901 |
| 36 | 6  | 0 | 1.630933  | 1.723002  | 0.523189  |
| 37 | 1  | 0 | 1.780841  | 1.513589  | 1.588140  |
| 38 | 1  | 0 | 2.571215  | 2.132172  | 0.140450  |
| 39 | 6  | 0 | 2.246229  | -0.656512 | 0.327590  |
| 40 | 1  | 0 | 2.036995  | -0.788494 | 1.391608  |
| 41 | 1  | 0 | 1.947251  | -1.574718 | -0.177657 |
| 42 | 6  | 0 | 3.719035  | -0.387980 | 0.108375  |
| 43 | 6  | 0 | 4.487572  | 0.231026  | 1.106894  |
| 44 | 6  | 0 | 4.356991  | -0.799998 | -1.072871 |
| 45 | 6  | 0 | 5.850572  | 0.460052  | 0.917579  |
| 46 | 1  | 0 | 4.027116  | 0.513123  | 2.050967  |
| 47 | 6  | 0 | 5.719701  | -0.570855 | -1.264836 |
| 48 | 1  | 0 | 3.796101  | -1.329507 | -1.839824 |
| 49 | 6  | 0 | 6.467019  | 0.065598  | -0.271772 |

|    |   |   |           |           |           |
|----|---|---|-----------|-----------|-----------|
| 50 | 1 | 0 | 6.433293  | 0.931439  | 1.702623  |
| 51 | 1 | 0 | 6.199930  | -0.901559 | -2.180262 |
| 52 | 1 | 0 | 7.528823  | 0.237148  | -0.416657 |
| 53 | 6 | 0 | 0.495285  | 2.691679  | 0.365868  |
| 54 | 6 | 0 | 0.658965  | 4.072411  | 0.430420  |
| 55 | 6 | 0 | -0.460399 | 4.895564  | 0.317813  |
| 56 | 1 | 0 | 1.650408  | 4.491537  | 0.566289  |
| 57 | 6 | 0 | -1.801761 | 2.922072  | 0.066839  |
| 58 | 6 | 0 | -1.711617 | 4.306591  | 0.132357  |
| 59 | 1 | 0 | -0.357206 | 5.974799  | 0.366501  |
| 60 | 1 | 0 | -2.755847 | 2.434814  | -0.080805 |
| 61 | 1 | 0 | -2.609379 | 4.906235  | 0.032815  |
| 62 | 7 | 0 | -0.720755 | 2.119601  | 0.185253  |
| 63 | 8 | 0 | -1.844226 | 0.420431  | 3.654375  |
| 64 | 1 | 0 | -2.234985 | -0.084409 | 4.381103  |
| 65 | 1 | 0 | -1.694934 | 1.297951  | 4.030963  |

-----  
**2<sub>dp</sub>-H<sub>2</sub>O (doublet) E(B3LYP/ SDD-6-31G(d,p))= -1567.38493820 hartree**  
 -----

| Center<br>Number | Atomic<br>Number | Atomic<br>Type | Coordinates (Angstroms) |           |           |
|------------------|------------------|----------------|-------------------------|-----------|-----------|
|                  |                  |                | X                       | Y         | Z         |
| 1                | 7                | 0              | -0.726126               | 1.128045  | 1.496814  |
| 2                | 6                | 0              | -1.864892               | 0.482150  | 2.179131  |
| 3                | 1                | 0              | -1.550757               | -0.526364 | 2.468883  |
| 4                | 1                | 0              | -2.137010               | 1.006259  | 3.107103  |
| 5                | 6                | 0              | -0.860374               | 2.600988  | 1.474039  |
| 6                | 1                | 0              | -1.926822               | 2.827664  | 1.353495  |
| 7                | 1                | 0              | -0.539514               | 3.057616  | 2.422365  |
| 8                | 6                | 0              | 0.585417                | 0.690452  | 2.030917  |
| 9                | 1                | 0              | 1.317789                | 1.454003  | 1.758342  |
| 10               | 1                | 0              | 0.568483                | 0.653596  | 3.131016  |
| 11               | 28               | 0              | -0.883028               | 0.595561  | -0.569889 |
| 12               | 6                | 0              | -3.068381               | 0.354793  | 1.265938  |
| 13               | 6                | 0              | -4.371087               | 0.400573  | 1.755383  |
| 14               | 6                | 0              | -3.834704               | -0.056931 | -0.879259 |
| 15               | 6                | 0              | -5.440561               | 0.198508  | 0.881391  |
| 16               | 1                | 0              | -4.543537               | 0.589179  | 2.810667  |
| 17               | 6                | 0              | -5.161459               | -0.040382 | -0.464539 |
| 18               | 1                | 0              | -3.579079               | -0.228073 | -1.920469 |
| 19               | 1                | 0              | -6.463399               | 0.230437  | 1.242042  |
| 20               | 1                | 0              | -5.955184               | -0.202968 | -1.185820 |
| 21               | 6                | 0              | -0.114666               | 3.217754  | 0.305368  |
| 22               | 6                | 0              | 0.424039                | 4.501573  | 0.368150  |

|    |   |   |           |           |           |
|----|---|---|-----------|-----------|-----------|
| 23 | 6 | 0 | 1.016314  | 5.047547  | -0.771411 |
| 24 | 1 | 0 | 0.373487  | 5.065719  | 1.294369  |
| 25 | 6 | 0 | 0.514016  | 3.001960  | -1.915844 |
| 26 | 6 | 0 | 1.058009  | 4.282725  | -1.937273 |
| 27 | 1 | 0 | 1.438601  | 6.047003  | -0.747176 |
| 28 | 1 | 0 | 0.538053  | 2.361783  | -2.792460 |
| 29 | 1 | 0 | 1.510913  | 4.663359  | -2.846321 |
| 30 | 7 | 0 | -2.792854 | 0.140927  | -0.044774 |
| 31 | 7 | 0 | -0.064289 | 2.471636  | -0.821594 |
| 32 | 6 | 0 | 1.030995  | -0.676238 | 1.496131  |
| 33 | 1 | 0 | 1.969823  | -0.950933 | 2.002385  |
| 34 | 1 | 0 | 0.293543  | -1.434652 | 1.776418  |
| 35 | 7 | 0 | 1.165233  | -0.714245 | 0.027486  |
| 36 | 6 | 0 | 1.268105  | -2.108169 | -0.470224 |
| 37 | 1 | 0 | 1.550054  | -2.046232 | -1.524959 |
| 38 | 1 | 0 | 2.070957  | -2.655447 | 0.044768  |
| 39 | 6 | 0 | 2.327995  | 0.082242  | -0.482089 |
| 40 | 1 | 0 | 2.235881  | 0.080223  | -1.572117 |
| 41 | 1 | 0 | 2.179600  | 1.115013  | -0.162517 |
| 42 | 6 | 0 | 3.716078  | -0.384665 | -0.075930 |
| 43 | 6 | 0 | 4.434376  | -1.288998 | -0.873096 |
| 44 | 6 | 0 | 4.321593  | 0.090546  | 1.097523  |
| 45 | 6 | 0 | 5.706228  | -1.723599 | -0.498503 |
| 46 | 1 | 0 | 4.002419  | -1.644135 | -1.805621 |
| 47 | 6 | 0 | 5.592828  | -0.342439 | 1.477811  |
| 48 | 1 | 0 | 3.805229  | 0.825319  | 1.711197  |
| 49 | 6 | 0 | 6.286381  | -1.255573 | 0.682033  |
| 50 | 1 | 0 | 6.247851  | -2.418852 | -1.132982 |
| 51 | 1 | 0 | 6.045273  | 0.040972  | 2.387570  |
| 52 | 1 | 0 | 7.277762  | -1.589637 | 0.972457  |
| 53 | 6 | 0 | -0.006113 | -2.923590 | -0.392612 |
| 54 | 6 | 0 | -0.166628 | -3.941498 | 0.551796  |
| 55 | 6 | 0 | -1.327016 | -4.716529 | 0.537443  |
| 56 | 1 | 0 | 0.618742  | -4.133136 | 1.276223  |
| 57 | 6 | 0 | -2.058537 | -3.427163 | -1.338714 |
| 58 | 6 | 0 | -2.294853 | -4.457918 | -0.430186 |
| 59 | 1 | 0 | -1.464743 | -5.514531 | 1.260621  |
| 60 | 1 | 0 | -2.784116 | -3.198128 | -2.115393 |
| 61 | 1 | 0 | -3.206648 | -5.041993 | -0.491175 |
| 62 | 7 | 0 | -0.948653 | -2.677000 | -1.325251 |
| 63 | 8 | 0 | -0.709668 | -0.242965 | -2.515161 |
| 64 | 1 | 0 | -1.396118 | -0.054474 | -3.167144 |
| 65 | 1 | 0 | -0.807198 | -1.204853 | -2.246587 |



$2_{dp}\text{-H}_2\text{O}$  (quartet) E(B3LYP/ SDD-6-31G(d,p))= -1567.34996093 hartree

| Center<br>Number | Atomic<br>Number | Atomic<br>Type | Coordinates (Angstroms) |           |           |
|------------------|------------------|----------------|-------------------------|-----------|-----------|
|                  |                  |                | X                       | Y         | Z         |
| 1                | 7                | 0              | 0.824247                | -0.696663 | 1.560925  |
| 2                | 6                | 0              | 1.938786                | 0.123932  | 2.095417  |
| 3                | 1                | 0              | 1.589707                | 1.163038  | 2.112411  |
| 4                | 1                | 0              | 2.200838                | -0.158361 | 3.125012  |
| 5                | 6                | 0              | 1.160569                | -2.144540 | 1.572467  |
| 6                | 1                | 0              | 2.251980                | -2.226648 | 1.502382  |
| 7                | 1                | 0              | 0.868294                | -2.613520 | 2.521183  |
| 8                | 6                | 0              | -0.502583               | -0.440268 | 2.174186  |
| 9                | 1                | 0              | -1.083079               | -1.362066 | 2.078302  |
| 10               | 1                | 0              | -0.408551               | -0.234891 | 3.249450  |
| 11               | 28               | 0              | 0.778415                | -0.073892 | -0.492701 |
| 12               | 6                | 0              | 3.134633                | -0.018906 | 1.179556  |
| 13               | 6                | 0              | 4.443889                | 0.035964  | 1.638366  |
| 14               | 6                | 0              | 3.873915                | -0.309439 | -1.018564 |
| 15               | 6                | 0              | 5.505824                | -0.066178 | 0.732387  |
| 16               | 1                | 0              | 4.631765                | 0.158409  | 2.701145  |
| 17               | 6                | 0              | 5.198697                | -0.244786 | -0.631157 |
| 18               | 1                | 0              | 3.609027                | -0.465351 | -2.060982 |
| 19               | 1                | 0              | 6.533887                | -0.022376 | 1.072912  |
| 20               | 1                | 0              | 5.981849                | -0.345636 | -1.374809 |
| 21               | 6                | 0              | 0.529714                | -2.857643 | 0.403599  |
| 22               | 6                | 0              | 0.154184                | -4.200123 | 0.463176  |
| 23               | 6                | 0              | -0.340946               | -4.826028 | -0.678502 |
| 24               | 1                | 0              | 0.258809                | -4.746537 | 1.395610  |
| 25               | 6                | 0              | -0.090298               | -2.741014 | -1.836533 |
| 26               | 6                | 0              | -0.459671               | -4.077979 | -1.858806 |
| 27               | 1                | 0              | -0.634180               | -5.870259 | -0.651568 |
| 28               | 1                | 0              | -0.193532               | -2.116183 | -2.718432 |
| 29               | 1                | 0              | -0.838907               | -4.520444 | -2.773077 |
| 30               | 7                | 0              | 2.835107                | -0.190476 | -0.149282 |
| 31               | 7                | 0              | 0.398246                | -2.131980 | -0.737218 |
| 32               | 6                | 0              | -1.239589               | 0.709565  | 1.491468  |
| 33               | 1                | 0              | -2.236529               | 0.822222  | 1.935587  |
| 34               | 1                | 0              | -0.707826               | 1.647920  | 1.665999  |
| 35               | 7                | 0              | -1.326470               | 0.516295  | 0.017066  |
| 36               | 6                | 0              | -1.521727               | 1.827239  | -0.659389 |
| 37               | 1                | 0              | -1.656065               | 1.605952  | -1.727505 |
| 38               | 1                | 0              | -2.433309               | 2.330489  | -0.315600 |
| 39               | 6                | 0              | -2.384165               | -0.469492 | -0.389079 |

|    |   |   |           |           |           |
|----|---|---|-----------|-----------|-----------|
| 40 | 1 | 0 | -2.275215 | -0.597887 | -1.469896 |
| 41 | 1 | 0 | -2.126822 | -1.426626 | 0.069505  |
| 42 | 6 | 0 | -3.818106 | -0.109050 | -0.049937 |
| 43 | 6 | 0 | -4.603420 | 0.637757  | -0.940915 |
| 44 | 6 | 0 | -4.399342 | -0.539640 | 1.152340  |
| 45 | 6 | 0 | -5.923079 | 0.965988  | -0.628801 |
| 46 | 1 | 0 | -4.186281 | 0.950128  | -1.895096 |
| 47 | 6 | 0 | -5.718466 | -0.212047 | 1.469261  |
| 48 | 1 | 0 | -3.822943 | -1.155273 | 1.839489  |
| 49 | 6 | 0 | -6.481675 | 0.546313  | 0.580161  |
| 50 | 1 | 0 | -6.517726 | 1.539771  | -1.333172 |
| 51 | 1 | 0 | -6.152260 | -0.557506 | 2.402793  |
| 52 | 1 | 0 | -7.509813 | 0.797646  | 0.821692  |
| 53 | 6 | 0 | -0.322062 | 2.712216  | -0.457414 |
| 54 | 6 | 0 | -0.429789 | 4.078595  | -0.257015 |
| 55 | 6 | 0 | 0.726139  | 4.866076  | -0.151501 |
| 56 | 1 | 0 | -1.415874 | 4.529569  | -0.193932 |
| 57 | 6 | 0 | 2.015564  | 2.846954  | -0.411892 |
| 58 | 6 | 0 | 1.972122  | 4.215858  | -0.237944 |
| 59 | 1 | 0 | 0.659928  | 5.937196  | 0.000044  |
| 60 | 1 | 0 | 2.960950  | 2.319785  | -0.465957 |
| 61 | 1 | 0 | 2.900788  | 4.771790  | -0.162519 |
| 62 | 7 | 0 | 0.893175  | 2.070230  | -0.533276 |
| 63 | 8 | 0 | 0.715230  | 0.254222  | -2.667024 |
| 64 | 1 | 0 | 1.418898  | -0.148168 | -3.195842 |
| 65 | 1 | 0 | 0.929862  | 1.201219  | -2.600422 |

-----

**1** (triplet) E(B3LYP/ SDD-6-31G(d,p))= -1490.68856073 hartree

| Center<br>Number | Atomic<br>Number | Atomic<br>Type | Coordinates (Angstroms) |           |           |
|------------------|------------------|----------------|-------------------------|-----------|-----------|
|                  |                  |                | X                       | Y         | Z         |
| 1                | 7                | 0              | -1.188657               | -1.621250 | -1.084288 |
| 2                | 6                | 0              | -2.172341               | -1.304474 | -2.148760 |
| 3                | 1                | 0              | -1.636223               | -0.838438 | -2.983265 |
| 4                | 1                | 0              | -2.640641               | -2.213870 | -2.546062 |
| 5                | 6                | 0              | -1.750430               | -2.591762 | -0.105885 |
| 6                | 1                | 0              | -2.837715               | -2.457832 | -0.085805 |
| 7                | 1                | 0              | -1.564634               | -3.624696 | -0.424179 |
| 8                | 6                | 0              | 0.140414                | -2.050341 | -1.617234 |
| 9                | 1                | 0              | 0.622839                | -2.653419 | -0.844481 |
| 10               | 1                | 0              | 0.021067                | -2.693911 | -2.497613 |
| 11               | 28               | 0              | -0.847812               | 0.169608  | -0.024747 |

|    |   |   |           |           |           |
|----|---|---|-----------|-----------|-----------|
| 12 | 6 | 0 | -3.224402 | -0.337629 | -1.635893 |
| 13 | 6 | 0 | -4.505537 | -0.289402 | -2.180160 |
| 14 | 6 | 0 | -3.711155 | 1.428674  | -0.202463 |
| 15 | 6 | 0 | -5.407702 | 0.665607  | -1.709863 |
| 16 | 1 | 0 | -4.791016 | -0.986782 | -2.961173 |
| 17 | 6 | 0 | -5.002719 | 1.542323  | -0.702637 |
| 18 | 1 | 0 | -3.356529 | 2.089898  | 0.580198  |
| 19 | 1 | 0 | -6.410682 | 0.721154  | -2.120889 |
| 20 | 1 | 0 | -5.672463 | 2.297851  | -0.307616 |
| 21 | 6 | 0 | -1.223020 | -2.354210 | 1.294625  |
| 22 | 6 | 0 | -1.195854 | -3.365229 | 2.253549  |
| 23 | 6 | 0 | -0.786768 | -3.059834 | 3.551605  |
| 24 | 1 | 0 | -1.496173 | -4.373706 | 1.987865  |
| 25 | 6 | 0 | -0.441484 | -0.798797 | 2.841907  |
| 26 | 6 | 0 | -0.405841 | -1.751158 | 3.853177  |
| 27 | 1 | 0 | -0.762524 | -3.831792 | 4.314135  |
| 28 | 1 | 0 | -0.138588 | 0.227073  | 3.023066  |
| 29 | 1 | 0 | -0.079987 | -1.472277 | 4.848895  |
| 30 | 7 | 0 | -2.834600 | 0.508796  | -0.653161 |
| 31 | 7 | 0 | -0.844006 | -1.090369 | 1.589065  |
| 32 | 6 | 0 | 1.010369  | -0.838653 | -1.963091 |
| 33 | 1 | 0 | 1.990219  | -1.169110 | -2.323878 |
| 34 | 1 | 0 | 0.550545  | -0.268151 | -2.776072 |
| 35 | 7 | 0 | 1.138735  | 0.066285  | -0.783151 |
| 36 | 6 | 0 | 1.403158  | 1.480474  | -1.164524 |
| 37 | 1 | 0 | 2.462748  | 1.647791  | -1.382875 |
| 38 | 1 | 0 | 0.850124  | 1.696651  | -2.086811 |
| 39 | 6 | 0 | 2.158573  | -0.428150 | 0.231513  |
| 40 | 1 | 0 | 2.063328  | 0.233647  | 1.096377  |
| 41 | 1 | 0 | 1.825376  | -1.417687 | 0.551000  |
| 42 | 6 | 0 | 3.594679  | -0.479865 | -0.236238 |
| 43 | 6 | 0 | 4.450721  | 0.615284  | -0.035982 |
| 44 | 6 | 0 | 4.112093  | -1.635732 | -0.843126 |
| 45 | 6 | 0 | 5.778891  | 0.569101  | -0.460870 |
| 46 | 1 | 0 | 4.086708  | 1.498929  | 0.483953  |
| 47 | 6 | 0 | 5.439611  | -1.683392 | -1.269846 |
| 48 | 1 | 0 | 3.486121  | -2.518265 | -0.956908 |
| 49 | 6 | 0 | 6.272716  | -0.578037 | -1.085363 |
| 50 | 1 | 0 | 6.431286  | 1.419887  | -0.291541 |
| 51 | 1 | 0 | 5.827319  | -2.586128 | -1.731099 |
| 52 | 1 | 0 | 7.307453  | -0.617320 | -1.410262 |
| 53 | 6 | 0 | 0.920631  | 2.423456  | -0.078079 |
| 54 | 6 | 0 | 1.539190  | 3.645434  | 0.178711  |
| 55 | 6 | 0 | 1.009061  | 4.485114  | 1.158783  |

|    |   |   |           |          |           |
|----|---|---|-----------|----------|-----------|
| 56 | 1 | 0 | 2.421963  | 3.933573 | -0.382675 |
| 57 | 6 | 0 | -0.683122 | 2.839898 | 1.560054  |
| 58 | 6 | 0 | -0.121606 | 4.073739 | 1.866538  |
| 59 | 1 | 0 | 1.475645  | 5.441589 | 1.372111  |
| 60 | 1 | 0 | -1.555901 | 2.474795 | 2.093094  |
| 61 | 1 | 0 | -0.559227 | 4.691590 | 2.642610  |
| 62 | 7 | 0 | -0.181534 | 2.031579 | 0.604410  |

-----  
**1** (singlet) E(B3LYP/ SDD-6-31G(d,p))= -1490.66057049 hartree

| Center<br>Number | Atomic<br>Number | Atomic<br>Type | Coordinates (Angstroms) |           |           |
|------------------|------------------|----------------|-------------------------|-----------|-----------|
|                  |                  |                | X                       | Y         | Z         |
| 1                | 7                | 0              | -1.129118               | -1.391250 | -1.216216 |
| 2                | 6                | 0              | -2.128419               | -0.992116 | -2.254671 |
| 3                | 1                | 0              | -1.614144               | -0.410265 | -3.026653 |
| 4                | 1                | 0              | -2.555868               | -1.875578 | -2.743800 |
| 5                | 6                | 0              | -1.701573               | -2.495199 | -0.372348 |
| 6                | 1                | 0              | -2.771652               | -2.295821 | -0.258009 |
| 7                | 1                | 0              | -1.604967               | -3.445403 | -0.910100 |
| 8                | 6                | 0              | 0.186080                | -1.800791 | -1.820828 |
| 9                | 1                | 0              | 0.678222                | -2.461287 | -1.104079 |
| 10               | 1                | 0              | 0.023963                | -2.375469 | -2.740055 |
| 11               | 28               | 0              | -0.820051               | 0.229827  | -0.169824 |
| 12               | 6                | 0              | -3.188229               | -0.145351 | -1.596805 |
| 13               | 6                | 0              | -4.492248               | -0.052157 | -2.071076 |
| 14               | 6                | 0              | -3.640089               | 1.353940  | 0.119883  |
| 15               | 6                | 0              | -5.392337               | 0.790620  | -1.417600 |
| 16               | 1                | 0              | -4.796773               | -0.628464 | -2.938520 |
| 17               | 6                | 0              | -4.956472               | 1.504423  | -0.302360 |
| 18               | 1                | 0              | -3.273720               | 1.896133  | 0.981046  |
| 19               | 1                | 0              | -6.414444               | 0.882667  | -1.770370 |
| 20               | 1                | 0              | -5.621019               | 2.167548  | 0.239882  |
| 21               | 6                | 0              | -1.075748               | -2.571516 | 1.002533  |
| 22               | 6                | 0              | -0.923640               | -3.788639 | 1.666571  |
| 23               | 6                | 0              | -0.441646               | -3.781520 | 2.976906  |
| 24               | 1                | 0              | -1.184430               | -4.721290 | 1.176183  |
| 25               | 6                | 0              | -0.285588               | -1.395840 | 2.824601  |
| 26               | 6                | 0              | -0.120550               | -2.561460 | 3.570705  |
| 27               | 1                | 0              | -0.318431               | -4.712374 | 3.521154  |
| 28               | 1                | 0              | -0.031556               | -0.427631 | 3.247986  |
| 29               | 1                | 0              | 0.255501                | -2.510002 | 4.586561  |
| 30               | 7                | 0              | -2.763563               | 0.547781  | -0.509094 |

|    |   |   |           |           |           |
|----|---|---|-----------|-----------|-----------|
| 31 | 7 | 0 | -0.755933 | -1.391401 | 1.566895  |
| 32 | 6 | 0 | 1.029806  | -0.560567 | -2.077222 |
| 33 | 1 | 0 | 2.037695  | -0.828378 | -2.409253 |
| 34 | 1 | 0 | 0.581598  | 0.055422  | -2.861103 |
| 35 | 7 | 0 | 1.068943  | 0.250692  | -0.819146 |
| 36 | 6 | 0 | 1.295380  | 1.707878  | -1.083434 |
| 37 | 1 | 0 | 2.353944  | 1.922279  | -1.258320 |
| 38 | 1 | 0 | 0.744995  | 1.981294  | -1.990088 |
| 39 | 6 | 0 | 2.085986  | -0.289057 | 0.189568  |
| 40 | 1 | 0 | 1.950056  | 0.307350  | 1.093939  |
| 41 | 1 | 0 | 1.768684  | -1.304260 | 0.429494  |
| 42 | 6 | 0 | 3.529107  | -0.267797 | -0.255329 |
| 43 | 6 | 0 | 4.347594  | 0.839366  | 0.022003  |
| 44 | 6 | 0 | 4.093156  | -1.374562 | -0.910611 |
| 45 | 6 | 0 | 5.684643  | 0.854256  | -0.376037 |
| 46 | 1 | 0 | 3.948005  | 1.682298  | 0.581697  |
| 47 | 6 | 0 | 5.429826  | -1.361172 | -1.310062 |
| 48 | 1 | 0 | 3.496192  | -2.267604 | -1.083601 |
| 49 | 6 | 0 | 6.225016  | -0.243115 | -1.049838 |
| 50 | 1 | 0 | 6.307837  | 1.713000  | -0.147529 |
| 51 | 1 | 0 | 5.853865  | -2.226561 | -1.809258 |
| 52 | 1 | 0 | 7.266668  | -0.234661 | -1.354221 |
| 53 | 6 | 0 | 0.749800  | 2.475087  | 0.093000  |
| 54 | 6 | 0 | 1.270107  | 3.676307  | 0.563308  |
| 55 | 6 | 0 | 0.693812  | 4.272300  | 1.686607  |
| 56 | 1 | 0 | 2.116830  | 4.132160  | 0.061118  |
| 57 | 6 | 0 | -0.839628 | 2.432561  | 1.801972  |
| 58 | 6 | 0 | -0.367340 | 3.630601  | 2.326194  |
| 59 | 1 | 0 | 1.081335  | 5.211340  | 2.068552  |
| 60 | 1 | 0 | -1.643927 | 1.886532  | 2.282268  |
| 61 | 1 | 0 | -0.821400 | 4.043125  | 3.220135  |
| 62 | 7 | 0 | -0.313539 | 1.879874  | 0.691305  |

-----  
**1(square pyramidal)** (singlet) E(B3LYP/ SDD-6-31G(d,p))= -1490.65417652 hartree  
 -----

| Center<br>Number | Atomic<br>Number | Atomic<br>Type | Coordinates (Angstroms) |           |          |
|------------------|------------------|----------------|-------------------------|-----------|----------|
|                  |                  |                | X                       | Y         | Z        |
| 1                | 7                | 0              | 0.771933                | -0.843001 | 1.787157 |
| 2                | 6                | 0              | 1.947245                | -0.111352 | 2.270274 |
| 3                | 1                | 0              | 1.642739                | 0.915598  | 2.505920 |
| 4                | 1                | 0              | 2.366895                | -0.535311 | 3.194558 |
| 5                | 6                | 0              | 0.997390                | -2.269974 | 1.560251 |

|    |    |   |           |           |           |
|----|----|---|-----------|-----------|-----------|
| 6  | 1  | 0 | 2.031168  | -2.525560 | 1.822841  |
| 7  | 1  | 0 | 0.368874  | -2.886067 | 2.215169  |
| 8  | 6  | 0 | -0.546107 | -0.476548 | 2.335384  |
| 9  | 1  | 0 | -1.171480 | -1.372113 | 2.329136  |
| 10 | 1  | 0 | -0.480689 | -0.160236 | 3.385477  |
| 11 | 28 | 0 | 0.706180  | 0.196619  | -0.314578 |
| 12 | 6  | 0 | 3.028935  | -0.077401 | 1.198524  |
| 13 | 6  | 0 | 4.384708  | -0.174185 | 1.508107  |
| 14 | 6  | 0 | 3.535316  | 0.065395  | -1.085688 |
| 15 | 6  | 0 | 5.332426  | -0.139731 | 0.484265  |
| 16 | 1  | 0 | 4.690785  | -0.281819 | 2.543594  |
| 17 | 6  | 0 | 4.900068  | -0.024358 | -0.837487 |
| 18 | 1  | 0 | 3.149111  | 0.157474  | -2.095249 |
| 19 | 1  | 0 | 6.390495  | -0.213542 | 0.714743  |
| 20 | 1  | 0 | 5.600842  | -0.007324 | -1.664618 |
| 21 | 6  | 0 | 0.768609  | -2.689186 | 0.111948  |
| 22 | 6  | 0 | 0.736238  | -4.040790 | -0.240853 |
| 23 | 6  | 0 | 0.582174  | -4.400016 | -1.576480 |
| 24 | 1  | 0 | 0.835092  | -4.798614 | 0.530354  |
| 25 | 6  | 0 | 0.490171  | -2.071139 | -2.118512 |
| 26 | 6  | 0 | 0.460906  | -3.392980 | -2.537985 |
| 27 | 1  | 0 | 0.556854  | -5.445961 | -1.865199 |
| 28 | 1  | 0 | 0.391005  | -1.256394 | -2.828875 |
| 29 | 1  | 0 | 0.340855  | -3.624118 | -3.590441 |
| 30 | 7  | 0 | 2.623134  | 0.050331  | -0.092679 |
| 31 | 7  | 0 | 0.635118  | -1.724585 | -0.818717 |
| 32 | 6  | 0 | -1.234436 | 0.647776  | 1.547036  |
| 33 | 1  | 0 | -2.267413 | 0.762272  | 1.893632  |
| 34 | 1  | 0 | -0.723368 | 1.595156  | 1.731632  |
| 35 | 7  | 0 | -1.236922 | 0.428603  | 0.049956  |
| 36 | 6  | 0 | -1.638756 | 1.695134  | -0.633006 |
| 37 | 1  | 0 | -1.842945 | 1.456559  | -1.682548 |
| 38 | 1  | 0 | -2.565687 | 2.094951  | -0.210239 |
| 39 | 6  | 0 | -2.185907 | -0.694709 | -0.358802 |
| 40 | 1  | 0 | -2.018132 | -0.847606 | -1.427238 |
| 41 | 1  | 0 | -1.844327 | -1.593063 | 0.155099  |
| 42 | 6  | 0 | -3.653886 | -0.452307 | -0.085852 |
| 43 | 6  | 0 | -4.474855 | 0.125144  | -1.067738 |
| 44 | 6  | 0 | -4.235066 | -0.849092 | 1.129419  |
| 45 | 6  | 0 | -5.833970 | 0.329436  | -0.829487 |
| 46 | 1  | 0 | -4.059151 | 0.393888  | -2.036290 |
| 47 | 6  | 0 | -5.594002 | -0.644758 | 1.369948  |
| 48 | 1  | 0 | -3.633032 | -1.348318 | 1.885432  |
| 49 | 6  | 0 | -6.393903 | -0.048977 | 0.392640  |

|    |   |   |           |           |           |
|----|---|---|-----------|-----------|-----------|
| 50 | 1 | 0 | -6.457615 | 0.768576  | -1.601635 |
| 51 | 1 | 0 | -6.030441 | -0.963496 | 2.311152  |
| 52 | 1 | 0 | -7.452776 | 0.103033  | 0.575671  |
| 53 | 6 | 0 | -0.517003 | 2.689557  | -0.562050 |
| 54 | 6 | 0 | -0.711127 | 4.063526  | -0.668355 |
| 55 | 6 | 0 | 0.395597  | 4.910622  | -0.641843 |
| 56 | 1 | 0 | -1.716002 | 4.459106  | -0.772228 |
| 57 | 6 | 0 | 1.787331  | 2.973691  | -0.383557 |
| 58 | 6 | 0 | 1.666050  | 4.352414  | -0.495848 |
| 59 | 1 | 0 | 0.268546  | 5.984999  | -0.727186 |
| 60 | 1 | 0 | 2.757487  | 2.511253  | -0.263509 |
| 61 | 1 | 0 | 2.555355  | 4.971717  | -0.464280 |
| 62 | 7 | 0 | 0.718030  | 2.147006  | -0.420319 |

-----  
**1(square pyramidal) (triplet) E(B3LYP/ SDD-6-31G(d,p))= -1490.65417652 hartree**  
 -----

| Center<br>Number | Atomic<br>Number | Atomic<br>Type | Coordinates (Angstroms) |           |           |
|------------------|------------------|----------------|-------------------------|-----------|-----------|
|                  |                  |                | X                       | Y         | Z         |
| 1                | 7                | 0              | 0.822073                | -0.806982 | 1.524576  |
| 2                | 6                | 0              | 1.949255                | -0.118070 | 2.207606  |
| 3                | 1                | 0              | 1.626355                | 0.901432  | 2.447963  |
| 4                | 1                | 0              | 2.203444                | -0.609149 | 3.155613  |
| 5                | 6                | 0              | 1.114620                | -2.259714 | 1.335560  |
| 6                | 1                | 0              | 2.197288                | -2.404393 | 1.408050  |
| 7                | 1                | 0              | 0.667941                | -2.852665 | 2.141233  |
| 8                | 6                | 0              | -0.509032               | -0.571973 | 2.167656  |
| 9                | 1                | 0              | -1.100961               | -1.480578 | 2.043023  |
| 10               | 1                | 0              | -0.395388               | -0.413771 | 3.246522  |
| 11               | 28               | 0              | 0.779329                | 0.077626  | -0.364751 |
| 12               | 6                | 0              | 3.154797                | -0.080272 | 1.283635  |
| 13               | 6                | 0              | 4.464500                | -0.110425 | 1.757852  |
| 14               | 6                | 0              | 3.895855                | -0.014063 | -0.921936 |
| 15               | 6                | 0              | 5.517335                | -0.079146 | 0.841237  |
| 16               | 1                | 0              | 4.657154                | -0.163674 | 2.824595  |
| 17               | 6                | 0              | 5.229064                | -0.037629 | -0.523557 |
| 18               | 1                | 0              | 3.625077                | 0.014708  | -1.973319 |
| 19               | 1                | 0              | 6.545632                | -0.100515 | 1.187919  |
| 20               | 1                | 0              | 6.017456                | -0.028436 | -1.267911 |
| 21               | 6                | 0              | 0.669859                | -2.768729 | -0.021301 |
| 22               | 6                | 0              | 0.443313                | -4.124180 | -0.256666 |
| 23               | 6                | 0              | 0.139681                | -4.547945 | -1.550365 |
| 24               | 1                | 0              | 0.511150                | -4.836577 | 0.559339  |
| 25               | 6                | 0              | 0.282900                | -2.266379 | -2.262176 |

|    |   |   |           |           |           |
|----|---|---|-----------|-----------|-----------|
| 26 | 6 | 0 | 0.064160  | -3.602505 | -2.574835 |
| 27 | 1 | 0 | -0.036137 | -5.599182 | -1.755190 |
| 28 | 1 | 0 | 0.220149  | -1.495624 | -3.024780 |
| 29 | 1 | 0 | -0.166367 | -3.889699 | -3.594544 |
| 30 | 7 | 0 | 2.878642  | -0.023734 | -0.039635 |
| 31 | 7 | 0 | 0.579626  | -1.855445 | -1.012469 |
| 32 | 6 | 0 | -1.236343 | 0.616420  | 1.539133  |
| 33 | 1 | 0 | -2.237346 | 0.707282  | 1.977105  |
| 34 | 1 | 0 | -0.701433 | 1.544638  | 1.761047  |
| 35 | 7 | 0 | -1.320392 | 0.482622  | 0.052299  |
| 36 | 6 | 0 | -1.647393 | 1.792926  | -0.560045 |
| 37 | 1 | 0 | -1.955873 | 1.608320  | -1.595519 |
| 38 | 1 | 0 | -2.501320 | 2.268202  | -0.063872 |
| 39 | 6 | 0 | -2.327500 | -0.565194 | -0.383230 |
| 40 | 1 | 0 | -2.222005 | -0.642748 | -1.468942 |
| 41 | 1 | 0 | -1.995880 | -1.517064 | 0.035531  |
| 42 | 6 | 0 | -3.771429 | -0.302922 | -0.012499 |
| 43 | 6 | 0 | -4.619783 | 0.391454  | -0.888971 |
| 44 | 6 | 0 | -4.300323 | -0.780582 | 1.197327  |
| 45 | 6 | 0 | -5.953081 | 0.627026  | -0.552984 |
| 46 | 1 | 0 | -4.247669 | 0.728431  | -1.853755 |
| 47 | 6 | 0 | -5.633114 | -0.544722 | 1.536597  |
| 48 | 1 | 0 | -3.678312 | -1.367168 | 1.870391  |
| 49 | 6 | 0 | -6.459818 | 0.165093  | 0.663600  |
| 50 | 1 | 0 | -6.599139 | 1.156937  | -1.245727 |
| 51 | 1 | 0 | -6.029018 | -0.926529 | 2.472320  |
| 52 | 1 | 0 | -7.498878 | 0.342066  | 0.922208  |
| 53 | 6 | 0 | -0.459984 | 2.726744  | -0.580662 |
| 54 | 6 | 0 | -0.628147 | 4.107547  | -0.674280 |
| 55 | 6 | 0 | 0.494757  | 4.926133  | -0.778262 |
| 56 | 1 | 0 | -1.627474 | 4.530402  | -0.670590 |
| 57 | 6 | 0 | 1.854289  | 2.958876  | -0.660841 |
| 58 | 6 | 0 | 1.761629  | 4.338770  | -0.774864 |
| 59 | 1 | 0 | 0.384131  | 6.003024  | -0.856838 |
| 60 | 1 | 0 | 2.817460  | 2.464215  | -0.642589 |
| 61 | 1 | 0 | 2.662528  | 4.936767  | -0.853316 |
| 62 | 7 | 0 | 0.768024  | 2.159052  | -0.566103 |

-----  
**1<sub>pt-A</sub>** (triplet) E(B3LYP/ SDD-6-31G(d,p))= -1490.82532347 hartree  
 -----

| Center<br>Number | Atomic<br>Number | Atomic<br>Type | Coordinates (Angstroms) |   |   |
|------------------|------------------|----------------|-------------------------|---|---|
|                  |                  |                | X                       | Y | Z |

-----



|    |    |   |           |           |           |
|----|----|---|-----------|-----------|-----------|
| 1  | 7  | 0 | -1.799482 | -1.147323 | -1.194042 |
| 2  | 6  | 0 | -2.661677 | -0.450888 | -2.195142 |
| 3  | 1  | 0 | -2.017029 | -0.024932 | -2.971793 |
| 4  | 1  | 0 | -3.328762 | -1.161614 | -2.696150 |
| 5  | 6  | 0 | -2.584447 | -2.115868 | -0.368861 |
| 6  | 1  | 0 | -3.629428 | -1.787569 | -0.370668 |
| 7  | 1  | 0 | -2.562568 | -3.112222 | -0.824303 |
| 8  | 6  | 0 | -0.545034 | -1.733409 | -1.755518 |
| 9  | 1  | 0 | -0.221216 | -2.528438 | -1.080679 |
| 10 | 1  | 0 | -0.732347 | -2.197167 | -2.731566 |
| 11 | 28 | 0 | -1.168754 | 0.293432  | 0.072475  |
| 12 | 6  | 0 | -3.451811 | 0.659752  | -1.523334 |
| 13 | 6  | 0 | -4.666725 | 1.114993  | -2.023262 |
| 14 | 6  | 0 | -3.522558 | 2.235322  | 0.209327  |
| 15 | 6  | 0 | -5.313493 | 2.174850  | -1.381388 |
| 16 | 1  | 0 | -5.104000 | 0.649756  | -2.901102 |
| 17 | 6  | 0 | -4.731694 | 2.743429  | -0.245703 |
| 18 | 1  | 0 | -3.045494 | 2.636040  | 1.097936  |
| 19 | 1  | 0 | -6.262577 | 2.543862  | -1.758103 |
| 20 | 1  | 0 | -5.208648 | 3.560382  | 0.284508  |
| 21 | 6  | 0 | -2.106508 | -2.158313 | 1.069036  |
| 22 | 6  | 0 | -2.377195 | -3.245044 | 1.897583  |
| 23 | 6  | 0 | -2.023112 | -3.180194 | 3.245853  |
| 24 | 1  | 0 | -2.869886 | -4.124759 | 1.495407  |
| 25 | 6  | 0 | -1.140602 | -0.989850 | 2.845448  |
| 26 | 6  | 0 | -1.399586 | -2.027328 | 3.730374  |
| 27 | 1  | 0 | -2.233145 | -4.014203 | 3.908382  |
| 28 | 1  | 0 | -0.656246 | -0.079276 | 3.184770  |
| 29 | 1  | 0 | -1.117483 | -1.933350 | 4.773242  |
| 30 | 7  | 0 | -2.886193 | 1.218274  | -0.417863 |
| 31 | 7  | 0 | -1.481624 | -1.049646 | 1.538714  |
| 32 | 6  | 0 | 0.536558  | -0.665954 | -1.904905 |
| 33 | 1  | 0 | 1.441352  | -1.119967 | -2.321697 |
| 34 | 1  | 0 | 0.205487  | 0.101536  | -2.611159 |
| 35 | 7  | 0 | 0.884546  | 0.039114  | -0.599898 |
| 36 | 6  | 0 | 1.657189  | 1.254697  | -1.035706 |
| 37 | 1  | 0 | 2.473371  | 0.928454  | -1.690306 |
| 38 | 1  | 0 | 0.984948  | 1.865896  | -1.650826 |
| 39 | 6  | 0 | 1.736379  | -0.889708 | 0.295709  |
| 40 | 1  | 0 | 1.925415  | -0.335674 | 1.218906  |
| 41 | 1  | 0 | 1.080280  | -1.719629 | 0.562277  |
| 42 | 6  | 0 | 3.032270  | -1.396736 | -0.287056 |
| 43 | 6  | 0 | 4.233196  | -0.693120 | -0.091987 |
| 44 | 6  | 0 | 3.074541  | -2.620319 | -0.979016 |

|    |   |   |          |           |           |
|----|---|---|----------|-----------|-----------|
| 45 | 6 | 0 | 5.436246 | -1.180629 | -0.602315 |
| 46 | 1 | 0 | 4.241569 | 0.218862  | 0.500451  |
| 47 | 6 | 0 | 4.276468 | -3.108366 | -1.491429 |
| 48 | 1 | 0 | 2.173090 | -3.219122 | -1.089919 |
| 49 | 6 | 0 | 5.457902 | -2.385291 | -1.309646 |
| 50 | 1 | 0 | 6.359173 | -0.636005 | -0.430808 |
| 51 | 1 | 0 | 4.295575 | -4.059111 | -2.014179 |
| 52 | 1 | 0 | 6.395277 | -2.770260 | -1.697963 |
| 53 | 6 | 0 | 2.296118 | 2.194662  | -0.026737 |
| 54 | 6 | 0 | 3.332426 | 3.032960  | -0.433570 |
| 55 | 6 | 0 | 3.870293 | 3.974083  | 0.447475  |
| 56 | 1 | 0 | 3.717113 | 2.947508  | -1.444443 |
| 57 | 6 | 0 | 2.360512 | 3.226185  | 2.142554  |
| 58 | 6 | 0 | 3.379319 | 4.072779  | 1.756244  |
| 59 | 1 | 0 | 4.675306 | 4.624035  | 0.116862  |
| 60 | 1 | 0 | 1.928210 | 3.218787  | 3.136495  |
| 61 | 1 | 0 | 3.784381 | 4.787083  | 2.464693  |
| 62 | 7 | 0 | 1.851641 | 2.333249  | 1.248739  |
| 63 | 1 | 0 | 1.121305 | 1.713153  | 1.578741  |

-----  
**1<sub>pt-A</sub>** (singlet) E(B3LYP/ SDD-6-31G(d,p))= -1490.81050971 hartree

| Center<br>Number | Atomic<br>Number | Atomic<br>Type | Coordinates (Angstroms) |           |           |
|------------------|------------------|----------------|-------------------------|-----------|-----------|
|                  |                  |                | X                       | Y         | Z         |
| 1                | 7                | 0              | 1.754528                | 0.039819  | 0.747178  |
| 2                | 6                | 0              | 1.756221                | 1.552664  | 0.875760  |
| 3                | 1                | 0              | 0.866889                | 1.878920  | 1.427736  |
| 4                | 1                | 0              | 2.634691                | 1.840771  | 1.461664  |
| 5                | 6                | 0              | 2.621681                | -0.634079 | 1.796320  |
| 6                | 1                | 0              | 3.485301                | 0.011778  | 1.983575  |
| 7                | 1                | 0              | 2.066240                | -0.730342 | 2.734715  |
| 8                | 6                | 0              | 0.350132                | -0.534677 | 0.832029  |
| 9                | 1                | 0              | 0.442170                | -1.622555 | 0.825222  |
| 10               | 1                | 0              | -0.021192               | -0.229343 | 1.815554  |
| 11               | 28               | 0              | 2.648438                | -0.374499 | -0.878517 |
| 12               | 6                | 0              | 1.839695                | 2.188110  | -0.489263 |
| 13               | 6                | 0              | 1.567016                | 3.526544  | -0.744856 |
| 14               | 6                | 0              | 2.466195                | 1.833316  | -2.728847 |
| 15               | 6                | 0              | 1.773559                | 4.021606  | -2.035603 |
| 16               | 1                | 0              | 1.202619                | 4.168949  | 0.049973  |
| 17               | 6                | 0              | 2.231079                | 3.165162  | -3.041564 |
| 18               | 1                | 0              | 2.816684                | 1.126047  | -3.475721 |

|    |   |   |           |           |           |
|----|---|---|-----------|-----------|-----------|
| 19 | 1 | 0 | 1.580135  | 5.067223  | -2.254770 |
| 20 | 1 | 0 | 2.404520  | 3.519047  | -4.051857 |
| 21 | 6 | 0 | 3.094442  | -1.963299 | 1.261225  |
| 22 | 6 | 0 | 3.499221  | -3.039108 | 2.038596  |
| 23 | 6 | 0 | 4.009598  | -4.175279 | 1.399784  |
| 24 | 1 | 0 | 3.434376  | -2.991033 | 3.120826  |
| 25 | 6 | 0 | 3.647917  | -3.106018 | -0.717981 |
| 26 | 6 | 0 | 4.085123  | -4.209465 | 0.005341  |
| 27 | 1 | 0 | 4.344385  | -5.024750 | 1.987312  |
| 28 | 1 | 0 | 3.681303  | -3.087172 | -1.803652 |
| 29 | 1 | 0 | 4.476350  | -5.074308 | -0.519161 |
| 30 | 7 | 0 | 2.278164  | 1.362908  | -1.474320 |
| 31 | 7 | 0 | 3.171190  | -2.005253 | -0.095471 |
| 32 | 6 | 0 | -0.627050 | -0.074601 | -0.262405 |
| 33 | 1 | 0 | -0.553472 | 1.012018  | -0.409035 |
| 34 | 1 | 0 | -0.355739 | -0.553906 | -1.209561 |
| 35 | 7 | 0 | -2.004588 | -0.473187 | 0.076107  |
| 36 | 6 | 0 | -2.889389 | -0.450729 | -1.098410 |
| 37 | 1 | 0 | -3.269674 | 0.547176  | -1.354165 |
| 38 | 1 | 0 | -2.321768 | -0.795275 | -1.972149 |
| 39 | 6 | 0 | -2.585622 | 0.252180  | 1.264148  |
| 40 | 1 | 0 | -3.672114 | 0.142420  | 1.191726  |
| 41 | 1 | 0 | -2.292589 | -0.295350 | 2.166066  |
| 42 | 6 | 0 | -2.227867 | 1.718151  | 1.451789  |
| 43 | 6 | 0 | -2.650503 | 2.718438  | 0.560995  |
| 44 | 6 | 0 | -1.500786 | 2.104158  | 2.591049  |
| 45 | 6 | 0 | -2.339632 | 4.059945  | 0.793634  |
| 46 | 1 | 0 | -3.263031 | 2.467816  | -0.300370 |
| 47 | 6 | 0 | -1.195068 | 3.448126  | 2.832167  |
| 48 | 1 | 0 | -1.225650 | 1.356162  | 3.332957  |
| 49 | 6 | 0 | -1.609575 | 4.428763  | 1.927815  |
| 50 | 1 | 0 | -2.697902 | 4.821696  | 0.107934  |
| 51 | 1 | 0 | -0.669401 | 3.730119  | 3.739563  |
| 52 | 1 | 0 | -1.401104 | 5.475793  | 2.125136  |
| 53 | 6 | 0 | -4.077635 | -1.384788 | -0.946036 |
| 54 | 6 | 0 | -5.280828 | -1.249753 | -1.628140 |
| 55 | 6 | 0 | -6.281164 | -2.212468 | -1.461555 |
| 56 | 1 | 0 | -5.433877 | -0.399327 | -2.283916 |
| 57 | 6 | 0 | -4.870573 | -3.401201 | 0.065938  |
| 58 | 6 | 0 | -6.075571 | -3.301958 | -0.605557 |
| 59 | 1 | 0 | -7.222503 | -2.110622 | -1.993093 |
| 60 | 1 | 0 | -4.628562 | -4.201160 | 0.755868  |
| 61 | 1 | 0 | -6.839112 | -4.056766 | -0.455634 |
| 62 | 7 | 0 | -3.924416 | -2.452385 | -0.129138 |

|    |   |   |           |           |          |
|----|---|---|-----------|-----------|----------|
| 63 | 1 | 0 | -3.032086 | -2.489823 | 0.367013 |
|----|---|---|-----------|-----------|----------|

---

1<sub>pt-B</sub> (triplet) E(B3LYP/ SDD-6-31G(d,p))= -1490.83805576 hartree

---

| Center<br>Number | Atomic<br>Number | Atomic<br>Type | Coordinates (Angstroms) |           |           |
|------------------|------------------|----------------|-------------------------|-----------|-----------|
|                  |                  |                | X                       | Y         | Z         |
| 1                | 7                | 0              | -1.412890               | -1.098730 | -0.796328 |
| 2                | 6                | 0              | -2.360828               | -0.769025 | -1.927331 |
| 3                | 1                | 0              | -1.830147               | -0.103608 | -2.614425 |
| 4                | 1                | 0              | -2.561772               | -1.692511 | -2.484315 |
| 5                | 6                | 0              | -2.041552               | -2.059550 | 0.165733  |
| 6                | 1                | 0              | -3.056300               | -1.709376 | 0.378950  |
| 7                | 1                | 0              | -2.126835               | -3.057020 | -0.283321 |
| 8                | 6                | 0              | -0.176800               | -1.731663 | -1.418816 |
| 9                | 1                | 0              | 0.261081                | -2.387055 | -0.663118 |
| 10               | 1                | 0              | -0.467340               | -2.366917 | -2.263669 |
| 11               | 28               | 0              | -0.427554               | 0.365878  | 0.413815  |
| 12               | 6                | 0              | -3.713216               | -0.163797 | -1.594550 |
| 13               | 6                | 0              | -4.865837               | -0.916265 | -1.398383 |
| 14               | 6                | 0              | -5.033881               | 1.839041  | -1.446849 |
| 15               | 6                | 0              | -6.105117               | -0.287033 | -1.211029 |
| 16               | 1                | 0              | -4.806915               | -1.999093 | -1.424418 |
| 17               | 6                | 0              | -6.190464               | 1.107134  | -1.229495 |
| 18               | 1                | 0              | -5.011039               | 2.921488  | -1.510200 |
| 19               | 1                | 0              | -6.999624               | -0.887208 | -1.071071 |
| 20               | 1                | 0              | -7.136417               | 1.622703  | -1.102657 |
| 21               | 6                | 0              | -1.289492               | -2.129439 | 1.480013  |
| 22               | 6                | 0              | -1.380303               | -3.232911 | 2.322751  |
| 23               | 6                | 0              | -0.745383               | -3.190700 | 3.566958  |
| 24               | 1                | 0              | -1.940921               | -4.110779 | 2.017425  |
| 25               | 6                | 0              | 0.037092                | -0.989736 | 3.033555  |
| 26               | 6                | 0              | -0.029760               | -2.047401 | 3.930828  |
| 27               | 1                | 0              | -0.806605               | -4.040165 | 4.240366  |
| 28               | 1                | 0              | 0.596883                | -0.088837 | 3.261980  |
| 29               | 1                | 0              | 0.475609                | -1.977683 | 4.887833  |
| 30               | 7                | 0              | -3.854213               | 1.193792  | -1.614934 |
| 31               | 7                | 0              | -0.583130               | -1.028231 | 1.831600  |
| 32               | 6                | 0              | 0.845838                | -0.687751 | -1.865929 |
| 33               | 1                | 0              | 1.703450                | -1.183993 | -2.332275 |
| 34               | 1                | 0              | 0.420777                | -0.021646 | -2.622557 |
| 35               | 7                | 0              | 1.278533                | 0.134566  | -0.696432 |
| 36               | 6                | 0              | 1.670709                | 1.531729  | -1.057774 |

|    |   |   |           |           |           |
|----|---|---|-----------|-----------|-----------|
| 37 | 1 | 0 | 2.724587  | 1.573225  | -1.348507 |
| 38 | 1 | 0 | 1.090319  | 1.842454  | -1.934535 |
| 39 | 6 | 0 | 2.384739  | -0.548309 | 0.131700  |
| 40 | 1 | 0 | 2.520951  | 0.086402  | 1.011658  |
| 41 | 1 | 0 | 1.965892  | -1.497591 | 0.472673  |
| 42 | 6 | 0 | 3.692899  | -0.765239 | -0.583316 |
| 43 | 6 | 0 | 4.713921  | 0.198363  | -0.511630 |
| 44 | 6 | 0 | 3.931973  | -1.955133 | -1.292908 |
| 45 | 6 | 0 | 5.929698  | -0.006703 | -1.164091 |
| 46 | 1 | 0 | 4.576961  | 1.094031  | 0.090867  |
| 47 | 6 | 0 | 5.147576  | -2.159606 | -1.945857 |
| 48 | 1 | 0 | 3.184451  | -2.746168 | -1.304270 |
| 49 | 6 | 0 | 6.143783  | -1.181713 | -1.888970 |
| 50 | 1 | 0 | 6.715705  | 0.737996  | -1.091484 |
| 51 | 1 | 0 | 5.325575  | -3.086602 | -2.481206 |
| 52 | 1 | 0 | 7.092918  | -1.344967 | -2.389139 |
| 53 | 6 | 0 | 1.378361  | 2.482775  | 0.087484  |
| 54 | 6 | 0 | 2.105720  | 3.649656  | 0.298350  |
| 55 | 6 | 0 | 1.730463  | 4.510199  | 1.333393  |
| 56 | 1 | 0 | 2.953261  | 3.883145  | -0.337956 |
| 57 | 6 | 0 | -0.044575 | 2.996909  | 1.881227  |
| 58 | 6 | 0 | 0.636230  | 4.178702  | 2.137556  |
| 59 | 1 | 0 | 2.288568  | 5.424001  | 1.513439  |
| 60 | 1 | 0 | -0.892069 | 2.692156  | 2.487513  |
| 61 | 1 | 0 | 0.319977  | 4.819652  | 2.953190  |
| 62 | 7 | 0 | 0.314789  | 2.164028  | 0.874623  |
| 63 | 1 | 0 | -3.041851 | 1.766222  | -1.829015 |

-----  
**1<sub>pt-B</sub>** (singlet) E(B3LYP/ SDD-6-31G(d,p))= -1490.82557756 hartree

| Center<br>Number | Atomic<br>Number | Atomic<br>Type | Coordinates (Angstroms) |           |           |
|------------------|------------------|----------------|-------------------------|-----------|-----------|
|                  |                  |                | X                       | Y         | Z         |
| 1                | 7                | 0              | -0.814253               | -1.592008 | -0.266621 |
| 2                | 6                | 0              | -1.629976               | -1.594921 | -1.551840 |
| 3                | 1                | 0              | -1.052302               | -1.065298 | -2.313647 |
| 4                | 1                | 0              | -1.704572               | -2.636972 | -1.881455 |
| 5                | 6                | 0              | -1.606653               | -2.107815 | 0.891886  |
| 6                | 1                | 0              | -2.364792               | -2.830495 | 0.573873  |
| 7                | 1                | 0              | -0.923533               | -2.652175 | 1.552038  |
| 8                | 6                | 0              | 0.428642                | -2.428002 | -0.518173 |
| 9                | 1                | 0              | 0.820605                | -2.719079 | 0.457359  |
| 10               | 1                | 0              | 0.179477                | -3.347933 | -1.058377 |

|    |    |   |           |           |           |
|----|----|---|-----------|-----------|-----------|
| 11 | 28 | 0 | -0.140293 | 0.221996  | 0.175873  |
| 12 | 6  | 0 | -3.046879 | -1.053471 | -1.537138 |
| 13 | 6  | 0 | -4.167292 | -1.873446 | -1.476542 |
| 14 | 6  | 0 | -4.482960 | 0.837037  | -1.890502 |
| 15 | 6  | 0 | -5.454051 | -1.332257 | -1.615282 |
| 16 | 1  | 0 | -4.041156 | -2.944363 | -1.357287 |
| 17 | 6  | 0 | -5.615036 | 0.039324  | -1.822653 |
| 18 | 1  | 0 | -4.512965 | 1.905680  | -2.072506 |
| 19 | 1  | 0 | -6.321233 | -1.985642 | -1.580885 |
| 20 | 1  | 0 | -6.595290 | 0.485921  | -1.950856 |
| 21 | 6  | 0 | -2.200533 | -0.964933 | 1.674991  |
| 22 | 6  | 0 | -3.184284 | -1.184657 | 2.634835  |
| 23 | 6  | 0 | -3.571415 | -0.138801 | 3.472557  |
| 24 | 1  | 0 | -3.617210 | -2.173920 | 2.747845  |
| 25 | 6  | 0 | -1.984731 | 1.252230  | 2.334122  |
| 26 | 6  | 0 | -2.943414 | 1.098414  | 3.326644  |
| 27 | 1  | 0 | -4.327440 | -0.293294 | 4.236285  |
| 28 | 1  | 0 | -1.464589 | 2.192124  | 2.232768  |
| 29 | 1  | 0 | -3.179102 | 1.934195  | 3.976429  |
| 30 | 7  | 0 | -3.258765 | 0.277522  | -1.747186 |
| 31 | 7  | 0 | -1.621948 | 0.255156  | 1.492030  |
| 32 | 6  | 0 | 1.444304  | -1.588427 | -1.272740 |
| 33 | 1  | 0 | 2.409715  | -2.100725 | -1.333797 |
| 34 | 1  | 0 | 1.121254  | -1.386298 | -2.297085 |
| 35 | 7  | 0 | 1.583810  | -0.282091 | -0.552875 |
| 36 | 6  | 0 | 2.087233  | 0.806186  | -1.434312 |
| 37 | 1  | 0 | 3.174530  | 0.746280  | -1.540445 |
| 38 | 1  | 0 | 1.655616  | 0.676783  | -2.433513 |
| 39 | 6  | 0 | 2.486677  | -0.409501 | 0.714957  |
| 40 | 1  | 0 | 2.469295  | 0.578151  | 1.179856  |
| 41 | 1  | 0 | 1.973731  | -1.100693 | 1.388348  |
| 42 | 6  | 0 | 3.899948  | -0.860732 | 0.456774  |
| 43 | 6  | 0 | 4.918568  | 0.085346  | 0.246349  |
| 44 | 6  | 0 | 4.234580  | -2.225943 | 0.486654  |
| 45 | 6  | 0 | 6.234678  | -0.326848 | 0.038613  |
| 46 | 1  | 0 | 4.693679  | 1.148937  | 0.287606  |
| 47 | 6  | 0 | 5.550801  | -2.637032 | 0.278203  |
| 48 | 1  | 0 | 3.476750  | -2.973066 | 0.714871  |
| 49 | 6  | 0 | 6.550008  | -1.688013 | 0.046379  |
| 50 | 1  | 0 | 7.016137  | 0.411513  | -0.108738 |
| 51 | 1  | 0 | 5.800978  | -3.692255 | 0.315911  |
| 52 | 1  | 0 | 7.575782  | -2.007689 | -0.106202 |
| 53 | 6  | 0 | 1.634691  | 2.121148  | -0.867135 |
| 54 | 6  | 0 | 2.273017  | 3.321028  | -1.163635 |

|    |   |   |           |          |           |
|----|---|---|-----------|----------|-----------|
| 55 | 6 | 0 | 1.737408  | 4.518802 | -0.690871 |
| 56 | 1 | 0 | 3.176134  | 3.313865 | -1.765397 |
| 57 | 6 | 0 | -0.018763 | 3.241597 | 0.326324  |
| 58 | 6 | 0 | 0.558448  | 4.474273 | 0.054623  |
| 59 | 1 | 0 | 2.223672  | 5.465081 | -0.906863 |
| 60 | 1 | 0 | -0.940481 | 3.194104 | 0.886478  |
| 61 | 1 | 0 | 0.089920  | 5.378221 | 0.428065  |
| 62 | 7 | 0 | 0.506772  | 2.068474 | -0.099805 |
| 63 | 1 | 0 | -2.451814 | 0.890249 | -1.832453 |

-----

**1<sub>pt-c</sub>** (singlet) E(B3LYP/ SDD-6-31G(d,p))= -1490.83574347 hartree

-----

| Center<br>Number | Atomic<br>Number | Atomic<br>Type | Coordinates (Angstroms) |           |           |
|------------------|------------------|----------------|-------------------------|-----------|-----------|
|                  |                  |                | X                       | Y         | Z         |
| 1                | 7                | 0              | 1.082166                | 1.176239  | -1.196490 |
| 2                | 6                | 0              | 2.145018                | 0.720119  | -2.166511 |
| 3                | 1                | 0              | 1.683924                | 0.020506  | -2.870637 |
| 4                | 1                | 0              | 2.525974                | 1.563841  | -2.753341 |
| 5                | 6                | 0              | 1.624942                | 2.429580  | -0.538386 |
| 6                | 1                | 0              | 2.619290                | 2.186838  | -0.154710 |
| 7                | 1                | 0              | 1.764589                | 3.177586  | -1.327540 |
| 8                | 6                | 0              | -0.224698               | 1.450891  | -1.901570 |
| 9                | 1                | 0              | -0.795192               | 2.144924  | -1.283680 |
| 10               | 1                | 0              | -0.045597               | 1.936171  | -2.867789 |
| 11               | 28               | 0              | 0.860683                | -0.508281 | -0.156047 |
| 12               | 6                | 0              | 3.241243                | 0.032698  | -1.390448 |
| 13               | 6                | 0              | 4.562967                | -0.004316 | -1.816408 |
| 14               | 6                | 0              | 3.743171                | -1.259059 | 0.481383  |
| 15               | 6                | 0              | 5.501200                | -0.710086 | -1.058197 |
| 16               | 1                | 0              | 4.854681                | 0.503169  | -2.730516 |
| 17               | 6                | 0              | 5.080999                | -1.342875 | 0.111452  |
| 18               | 1                | 0              | 3.394501                | -1.751156 | 1.377799  |
| 19               | 1                | 0              | 6.538489                | -0.760069 | -1.374695 |
| 20               | 1                | 0              | 5.773707                | -1.899366 | 0.733369  |
| 21               | 6                | 0              | 0.817305                | 3.092013  | 0.559913  |
| 22               | 6                | 0              | -0.026472               | 4.176234  | 0.349145  |
| 23               | 6                | 0              | -0.636142               | 4.824301  | 1.434134  |
| 24               | 1                | 0              | -0.184118               | 4.542272  | -0.659990 |
| 25               | 6                | 0              | 0.463278                | 3.309442  | 2.925452  |
| 26               | 6                | 0              | -0.392153               | 4.384383  | 2.737053  |
| 27               | 1                | 0              | -1.282070               | 5.679818  | 1.258407  |
| 28               | 1                | 0              | 0.730708                | 2.919466  | 3.901482  |

|    |   |   |           |           |           |
|----|---|---|-----------|-----------|-----------|
| 29 | 1 | 0 | -0.836022 | 4.874336  | 3.597105  |
| 30 | 7 | 0 | 2.827032  | -0.586277 | -0.248930 |
| 31 | 7 | 0 | 1.027594  | 2.706915  | 1.852289  |
| 32 | 6 | 0 | -0.989851 | 0.147692  | -2.067782 |
| 33 | 1 | 0 | -2.013896 | 0.332825  | -2.407253 |
| 34 | 1 | 0 | -0.513402 | -0.493461 | -2.813609 |
| 35 | 7 | 0 | -0.989820 | -0.584436 | -0.757235 |
| 36 | 6 | 0 | -1.233161 | -2.056033 | -0.961146 |
| 37 | 1 | 0 | -2.301579 | -2.255694 | -1.081443 |
| 38 | 1 | 0 | -0.730893 | -2.365241 | -1.884008 |
| 39 | 6 | 0 | -1.995887 | 0.005869  | 0.252688  |
| 40 | 1 | 0 | -1.829846 | -0.543890 | 1.181541  |
| 41 | 1 | 0 | -1.679487 | 1.038744  | 0.419875  |
| 42 | 6 | 0 | -3.445486 | -0.055786 | -0.155546 |
| 43 | 6 | 0 | -4.248193 | -1.135613 | 0.250704  |
| 44 | 6 | 0 | -4.031284 | 0.979422  | -0.904647 |
| 45 | 6 | 0 | -5.594528 | -1.194023 | -0.110346 |
| 46 | 1 | 0 | -3.830235 | -1.918975 | 0.879386  |
| 47 | 6 | 0 | -5.376480 | 0.920029  | -1.268207 |
| 48 | 1 | 0 | -3.447370 | 1.855383  | -1.182081 |
| 49 | 6 | 0 | -6.157385 | -0.170795 | -0.877010 |
| 50 | 1 | 0 | -6.207192 | -2.027533 | 0.217550  |
| 51 | 1 | 0 | -5.819749 | 1.727582  | -1.841818 |
| 52 | 1 | 0 | -7.205811 | -0.213916 | -1.153791 |
| 53 | 6 | 0 | -0.642718 | -2.779065 | 0.216049  |
| 54 | 6 | 0 | -1.114857 | -3.988510 | 0.712431  |
| 55 | 6 | 0 | -0.501037 | -4.548759 | 1.834534  |
| 56 | 1 | 0 | -1.953802 | -4.480278 | 0.230836  |
| 57 | 6 | 0 | 0.972664  | -2.657072 | 1.896862  |
| 58 | 6 | 0 | 0.546036  | -3.858266 | 2.448379  |
| 59 | 1 | 0 | -0.848775 | -5.495537 | 2.236089  |
| 60 | 1 | 0 | 1.764214  | -2.086082 | 2.365625  |
| 61 | 1 | 0 | 1.026193  | -4.238966 | 3.343114  |
| 62 | 7 | 0 | 0.415002  | -2.136432 | 0.781580  |
| 63 | 1 | 0 | 1.684880  | 1.952012  | 2.031673  |

-----

**1**<sub>pt-c</sub> (triplet) E(B3LYP/ SDD-6-31G(d,p))= -1490.83088438 hartree

| Center<br>Number | Atomic<br>Number | Atomic<br>Type | Coordinates (Angstroms) |          |           |
|------------------|------------------|----------------|-------------------------|----------|-----------|
|                  |                  |                | X                       | Y        | Z         |
| 1                | 7                | 0              | 1.200252                | 1.278717 | -1.104917 |
| 2                | 6                | 0              | 2.193783                | 0.735224 | -2.108447 |



|    |    |   |           |           |           |
|----|----|---|-----------|-----------|-----------|
| 3  | 1  | 0 | 1.631208  | 0.221947  | -2.893169 |
| 4  | 1  | 0 | 2.726282  | 1.554443  | -2.602546 |
| 5  | 6  | 0 | 1.778010  | 2.589283  | -0.621590 |
| 6  | 1  | 0 | 2.804838  | 2.379756  | -0.304930 |
| 7  | 1  | 0 | 1.848260  | 3.271117  | -1.478750 |
| 8  | 6  | 0 | -0.132909 | 1.466619  | -1.783913 |
| 9  | 1  | 0 | -0.734811 | 2.125513  | -1.157236 |
| 10 | 1  | 0 | -0.002002 | 1.963230  | -2.753433 |
| 11 | 28 | 0 | 0.867040  | -0.458738 | 0.178506  |
| 12 | 6  | 0 | 3.160164  | -0.256014 | -1.506678 |
| 13 | 6  | 0 | 4.450213  | -0.436938 | -1.992736 |
| 14 | 6  | 0 | 3.400271  | -2.061903 | -0.040098 |
| 15 | 6  | 0 | 5.228255  | -1.478661 | -1.477759 |
| 16 | 1  | 0 | 4.838356  | 0.211633  | -2.771729 |
| 17 | 6  | 0 | 4.691519  | -2.307591 | -0.490271 |
| 18 | 1  | 0 | 2.941385  | -2.677731 | 0.724732  |
| 19 | 1  | 0 | 6.236153  | -1.642023 | -1.847058 |
| 20 | 1  | 0 | 5.261143  | -3.131039 | -0.073588 |
| 21 | 6  | 0 | 1.068506  | 3.348544  | 0.485016  |
| 22 | 6  | 0 | 0.040180  | 4.261166  | 0.277054  |
| 23 | 6  | 0 | -0.466876 | 5.017723  | 1.343695  |
| 24 | 1  | 0 | -0.340790 | 4.417764  | -0.726198 |
| 25 | 6  | 0 | 1.106811  | 3.968289  | 2.808349  |
| 26 | 6  | 0 | 0.067582  | 4.866825  | 2.625643  |
| 27 | 1  | 0 | -1.259604 | 5.738529  | 1.164963  |
| 28 | 1  | 0 | 1.606475  | 3.811496  | 3.758215  |
| 29 | 1  | 0 | -0.291348 | 5.451208  | 3.466099  |
| 30 | 7  | 0 | 2.648577  | -1.051240 | -0.535064 |
| 31 | 7  | 0 | 1.560891  | 3.247785  | 1.754737  |
| 32 | 6  | 0 | -0.866202 | 0.132454  | -1.977020 |
| 33 | 1  | 0 | -1.853688 | 0.321113  | -2.411069 |
| 34 | 1  | 0 | -0.331279 | -0.519220 | -2.673222 |
| 35 | 7  | 0 | -0.979895 | -0.576365 | -0.673123 |
| 36 | 6  | 0 | -1.180876 | -2.051832 | -0.781823 |
| 37 | 1  | 0 | -2.221539 | -2.290941 | -1.020528 |
| 38 | 1  | 0 | -0.561100 | -2.423921 | -1.606104 |
| 39 | 6  | 0 | -2.044506 | 0.053370  | 0.246053  |
| 40 | 1  | 0 | -1.969506 | -0.475727 | 1.198680  |
| 41 | 1  | 0 | -1.733161 | 1.087478  | 0.420862  |
| 42 | 6  | 0 | -3.458783 | 0.005986  | -0.278279 |
| 43 | 6  | 0 | -4.301763 | -1.067187 | 0.056346  |
| 44 | 6  | 0 | -3.968929 | 1.046001  | -1.073938 |
| 45 | 6  | 0 | -5.612566 | -1.113887 | -0.418970 |
| 46 | 1  | 0 | -3.946418 | -1.853289 | 0.718737  |

|    |   |   |           |           |           |
|----|---|---|-----------|-----------|-----------|
| 47 | 6 | 0 | -5.278847 | 0.998840  | -1.550589 |
| 48 | 1 | 0 | -3.355299 | 1.916515  | -1.299278 |
| 49 | 6 | 0 | -6.099413 | -0.085524 | -1.229346 |
| 50 | 1 | 0 | -6.258125 | -1.942148 | -0.145337 |
| 51 | 1 | 0 | -5.664774 | 1.811006  | -2.158148 |
| 52 | 1 | 0 | -7.120766 | -0.119477 | -1.594470 |
| 53 | 6 | 0 | -0.755422 | -2.708138 | 0.520731  |
| 54 | 6 | 0 | -1.308442 | -3.900493 | 0.977798  |
| 55 | 6 | 0 | -0.849101 | -4.449450 | 2.177517  |
| 56 | 1 | 0 | -2.087235 | -4.392330 | 0.403733  |
| 57 | 6 | 0 | 0.654660  | -2.595213 | 2.386528  |
| 58 | 6 | 0 | 0.144152  | -3.781505 | 2.897966  |
| 59 | 1 | 0 | -1.267568 | -5.379812 | 2.549051  |
| 60 | 1 | 0 | 1.425839  | -2.043103 | 2.915249  |
| 61 | 1 | 0 | 0.515869  | -4.169042 | 3.840177  |
| 62 | 7 | 0 | 0.222087  | -2.070574 | 1.217362  |
| 63 | 1 | 0 | 2.365866  | 2.647537  | 1.917744  |

-----

Ni<sup>I</sup> HNPY 2<sub>A</sub>(doublet) E(B3LYP/ SDD-6-31G(d,p))= -1491.22872786 hartree

| Center<br>Number | Atomic<br>Number | Atomic<br>Type | Coordinates (Angstroms) |           |           |
|------------------|------------------|----------------|-------------------------|-----------|-----------|
|                  |                  |                | X                       | Y         | Z         |
| 1                | 7                | 0              | -1.577350               | -1.550748 | -1.097497 |
| 2                | 6                | 0              | -2.549804               | -1.061976 | -2.085604 |
| 3                | 1                | 0              | -1.996633               | -0.661226 | -2.943316 |
| 4                | 1                | 0              | -3.185088               | -1.866679 | -2.482290 |
| 5                | 6                | 0              | -2.164612               | -2.447812 | -0.090060 |
| 6                | 1                | 0              | -3.243808               | -2.256990 | -0.058895 |
| 7                | 1                | 0              | -2.048836               | -3.506206 | -0.361984 |
| 8                | 6                | 0              | -0.282963               | -2.000135 | -1.642150 |
| 9                | 1                | 0              | 0.168962                | -2.672836 | -0.909120 |
| 10               | 1                | 0              | -0.400843               | -2.583488 | -2.567101 |
| 11               | 28               | 0              | -1.027470               | 0.289327  | 0.016510  |
| 12               | 6                | 0              | -3.427310               | 0.049743  | -1.520364 |
| 13               | 6                | 0              | -4.727019               | 0.239849  | -1.986834 |
| 14               | 6                | 0              | -3.630795               | 1.885603  | -0.101419 |
| 15               | 6                | 0              | -5.487578               | 1.298890  | -1.492065 |
| 16               | 1                | 0              | -5.137205               | -0.436872 | -2.729535 |
| 17               | 6                | 0              | -4.928326               | 2.138863  | -0.529319 |
| 18               | 1                | 0              | -3.163048               | 2.504539  | 0.656057  |
| 19               | 1                | 0              | -6.500720               | 1.459702  | -1.846523 |
| 20               | 1                | 0              | -5.484717               | 2.969779  | -0.110455 |

|    |   |   |           |           |           |
|----|---|---|-----------|-----------|-----------|
| 21 | 6 | 0 | -1.624394 | -2.213165 | 1.313706  |
| 22 | 6 | 0 | -1.694249 | -3.224412 | 2.273407  |
| 23 | 6 | 0 | -1.297546 | -2.959438 | 3.582306  |
| 24 | 1 | 0 | -2.064348 | -4.206030 | 1.994741  |
| 25 | 6 | 0 | -0.773301 | -0.731212 | 2.886341  |
| 26 | 6 | 0 | -0.833243 | -1.681963 | 3.897510  |
| 27 | 1 | 0 | -1.350237 | -3.733715 | 4.340946  |
| 28 | 1 | 0 | -0.410000 | 0.270554  | 3.090269  |
| 29 | 1 | 0 | -0.518699 | -1.425731 | 4.902969  |
| 30 | 7 | 0 | -2.885471 | 0.867503  | -0.581264 |
| 31 | 7 | 0 | -1.153388 | -0.979548 | 1.615538  |
| 32 | 6 | 0 | 0.658341  | -0.825616 | -1.938239 |
| 33 | 1 | 0 | 1.592704  | -1.203786 | -2.368688 |
| 34 | 1 | 0 | 0.198690  | -0.178183 | -2.691835 |
| 35 | 7 | 0 | 0.951414  | 0.039886  | -0.736750 |
| 36 | 6 | 0 | 1.578242  | 1.294017  | -1.236427 |
| 37 | 1 | 0 | 2.557706  | 1.087304  | -1.683070 |
| 38 | 1 | 0 | 0.938529  | 1.693717  | -2.032903 |
| 39 | 6 | 0 | 1.871590  | -0.666815 | 0.255198  |
| 40 | 1 | 0 | 1.971552  | 0.008563  | 1.109408  |
| 41 | 1 | 0 | 1.318803  | -1.535774 | 0.612163  |
| 42 | 6 | 0 | 3.238738  | -1.075464 | -0.249815 |
| 43 | 6 | 0 | 4.346053  | -0.227948 | -0.084716 |
| 44 | 6 | 0 | 3.441063  | -2.329941 | -0.848038 |
| 45 | 6 | 0 | 5.612001  | -0.607230 | -0.532834 |
| 46 | 1 | 0 | 4.226379  | 0.722088  | 0.431384  |
| 47 | 6 | 0 | 4.704929  | -2.711564 | -1.298891 |
| 48 | 1 | 0 | 2.613896  | -3.029835 | -0.939225 |
| 49 | 6 | 0 | 5.791350  | -1.847390 | -1.148595 |
| 50 | 1 | 0 | 6.459903  | 0.054732  | -0.387094 |
| 51 | 1 | 0 | 4.844678  | -3.687458 | -1.752890 |
| 52 | 1 | 0 | 6.776243  | -2.146971 | -1.492122 |
| 53 | 6 | 0 | 1.762016  | 2.396420  | -0.212252 |
| 54 | 6 | 0 | 2.843519  | 3.273614  | -0.240277 |
| 55 | 6 | 0 | 2.906685  | 4.329623  | 0.671578  |
| 56 | 1 | 0 | 3.627162  | 3.127441  | -0.975634 |
| 57 | 6 | 0 | 0.835556  | 3.604389  | 1.621128  |
| 58 | 6 | 0 | 1.890990  | 4.499204  | 1.619292  |
| 59 | 1 | 0 | 3.747226  | 5.016149  | 0.646206  |
| 60 | 1 | 0 | 0.005544  | 3.655308  | 2.316994  |
| 61 | 1 | 0 | 1.917523  | 5.306778  | 2.341755  |
| 62 | 7 | 0 | 0.802969  | 2.601507  | 0.717329  |
| 63 | 1 | 0 | -0.018972 | 1.914969  | 0.710618  |

Ni<sup>I</sup> HNP<sub>y</sub> 2<sub>A</sub> (quartet) E(B3LYP/ SDD-6-31G(d,p))= -1491.18994690 hartree

| Center<br>Number | Atomic<br>Number | Atomic<br>Type | Coordinates (Angstroms) |           |           |
|------------------|------------------|----------------|-------------------------|-----------|-----------|
|                  |                  |                | X                       | Y         | Z         |
| 1                | 7                | 0              | -1.470259               | -0.958902 | -1.137180 |
| 2                | 6                | 0              | -2.168579               | -0.261335 | -2.252780 |
| 3                | 1                | 0              | -1.453633               | 0.415836  | -2.730689 |
| 4                | 1                | 0              | -2.499325               | -0.974573 | -3.019122 |
| 5                | 6                | 0              | -2.331338               | -2.069360 | -0.614744 |
| 6                | 1                | 0              | -3.377515               | -1.804279 | -0.797273 |
| 7                | 1                | 0              | -2.137798               | -2.996627 | -1.166043 |
| 8                | 6                | 0              | -0.146957               | -1.524609 | -1.555348 |
| 9                | 1                | 0              | 0.158427                | -2.213224 | -0.764429 |
| 10               | 1                | 0              | -0.298139               | -2.130936 | -2.459361 |
| 11               | 28               | 0              | -1.426200               | 0.473957  | 0.430168  |
| 12               | 6                | 0              | -3.338847               | 0.546597  | -1.727960 |
| 13               | 6                | 0              | -4.441710               | 0.871627  | -2.513418 |
| 14               | 6                | 0              | -4.210591               | 1.727518  | 0.084032  |
| 15               | 6                | 0              | -5.453830               | 1.660279  | -1.963361 |
| 16               | 1                | 0              | -4.508560               | 0.513115  | -3.535567 |
| 17               | 6                | 0              | -5.338043               | 2.094039  | -0.641420 |
| 18               | 1                | 0              | -4.070078               | 2.040134  | 1.114153  |
| 19               | 1                | 0              | -6.322151               | 1.927186  | -2.557174 |
| 20               | 1                | 0              | -6.106202               | 2.702230  | -0.177269 |
| 21               | 6                | 0              | -2.155993               | -2.273939 | 0.872864  |
| 22               | 6                | 0              | -2.339421               | -3.507170 | 1.493293  |
| 23               | 6                | 0              | -2.260623               | -3.581304 | 2.885224  |
| 24               | 1                | 0              | -2.547972               | -4.391235 | 0.899577  |
| 25               | 6                | 0              | -1.801059               | -1.230497 | 2.927543  |
| 26               | 6                | 0              | -1.991931               | -2.423124 | 3.616317  |
| 27               | 1                | 0              | -2.404388               | -4.530966 | 3.390663  |
| 28               | 1                | 0              | -1.572772               | -0.302853 | 3.443419  |
| 29               | 1                | 0              | -1.923780               | -2.440792 | 4.698163  |
| 30               | 7                | 0              | -3.232661               | 0.970043  | -0.448701 |
| 31               | 7                | 0              | -1.886287               | -1.159521 | 1.585905  |
| 32               | 6                | 0              | 0.974896                | -0.524735 | -1.846309 |
| 33               | 1                | 0              | 1.772975                | -1.091631 | -2.348916 |
| 34               | 1                | 0              | 0.630597                | 0.216892  | -2.573610 |
| 35               | 7                | 0              | 1.486688                | 0.202315  | -0.669485 |
| 36               | 6                | 0              | 2.282002                | 1.361356  | -1.091993 |
| 37               | 1                | 0              | 3.285477                | 1.089086  | -1.449203 |
| 38               | 1                | 0              | 1.770780                | 1.843679  | -1.934924 |

|    |   |   |          |           |           |
|----|---|---|----------|-----------|-----------|
| 39 | 6 | 0 | 2.228890 | -0.661852 | 0.308118  |
| 40 | 1 | 0 | 2.436502 | -0.035492 | 1.181908  |
| 41 | 1 | 0 | 1.530239 | -1.430011 | 0.650886  |
| 42 | 6 | 0 | 3.514564 | -1.299565 | -0.181445 |
| 43 | 6 | 0 | 4.747937 | -0.660347 | 0.019296  |
| 44 | 6 | 0 | 3.505567 | -2.543449 | -0.831890 |
| 45 | 6 | 0 | 5.935434 | -1.233421 | -0.437961 |
| 46 | 1 | 0 | 4.785434 | 0.279197  | 0.567050  |
| 47 | 6 | 0 | 4.690633 | -3.119406 | -1.291462 |
| 48 | 1 | 0 | 2.570470 | -3.085155 | -0.956676 |
| 49 | 6 | 0 | 5.907521 | -2.461908 | -1.100509 |
| 50 | 1 | 0 | 6.881818 | -0.730595 | -0.264639 |
| 51 | 1 | 0 | 4.666543 | -4.085815 | -1.785267 |
| 52 | 1 | 0 | 6.830449 | -2.912479 | -1.451244 |
| 53 | 6 | 0 | 2.433948 | 2.412774  | -0.014463 |
| 54 | 6 | 0 | 3.547241 | 3.241152  | 0.103527  |
| 55 | 6 | 0 | 3.568856 | 4.241032  | 1.077799  |
| 56 | 1 | 0 | 4.387563 | 3.099105  | -0.567083 |
| 57 | 6 | 0 | 1.392009 | 3.560223  | 1.794630  |
| 58 | 6 | 0 | 2.477221 | 4.405655  | 1.938400  |
| 59 | 1 | 0 | 4.435458 | 4.888377  | 1.169006  |
| 60 | 1 | 0 | 0.500970 | 3.605291  | 2.410865  |
| 61 | 1 | 0 | 2.469857 | 5.171305  | 2.705253  |
| 62 | 7 | 0 | 1.404300 | 2.607984  | 0.838460  |
| 63 | 1 | 0 | 0.563128 | 1.983622  | 0.743964  |

-----

Ni<sup>I</sup> HNP<sub>2</sub> (doublet)E(B3LYP/ SDD-6-31G(d,p))= -1491.24714738 hartree

| Center<br>Number | Atomic<br>Number | Atomic<br>Type | Coordinates (Angstroms) |           |           |
|------------------|------------------|----------------|-------------------------|-----------|-----------|
|                  |                  |                | X                       | Y         | Z         |
| 1                | 7                | 0              | -1.238806               | -1.321970 | -1.099506 |
| 2                | 6                | 0              | -1.967341               | -0.826885 | -2.290231 |
| 3                | 1                | 0              | -1.265179               | -0.265715 | -2.915392 |
| 4                | 1                | 0              | -2.334207               | -1.660140 | -2.905691 |
| 5                | 6                | 0              | -2.077023               | -2.305788 | -0.357649 |
| 6                | 1                | 0              | -3.129746               | -2.066035 | -0.549036 |
| 7                | 1                | 0              | -1.920666               | -3.322142 | -0.740572 |
| 8                | 6                | 0              | 0.073822                | -1.909734 | -1.528050 |
| 9                | 1                | 0              | 0.421341                | -2.543664 | -0.708152 |
| 10               | 1                | 0              | -0.061936               | -2.561139 | -2.403489 |
| 11               | 28               | 0              | -0.454585               | 0.085468  | 0.411107  |
| 12               | 6                | 0              | -3.136942               | 0.089029  | -1.996850 |

|    |   |   |           |           |           |
|----|---|---|-----------|-----------|-----------|
| 13 | 6 | 0 | -4.307290 | 0.097637  | -2.749509 |
| 14 | 6 | 0 | -3.959927 | 1.914144  | -0.700201 |
| 15 | 6 | 0 | -5.304684 | 1.036783  | -2.473348 |
| 16 | 1 | 0 | -4.432598 | -0.623992 | -3.549462 |
| 17 | 6 | 0 | -5.131216 | 1.959417  | -1.435984 |
| 18 | 1 | 0 | -3.741103 | 2.580294  | 0.126085  |
| 19 | 1 | 0 | -6.216279 | 1.045487  | -3.062770 |
| 20 | 1 | 0 | -5.890138 | 2.695850  | -1.198541 |
| 21 | 6 | 0 | -1.869878 | -2.269266 | 1.146207  |
| 22 | 6 | 0 | -2.153336 | -3.384812 | 1.931799  |
| 23 | 6 | 0 | -2.046819 | -3.286979 | 3.319379  |
| 24 | 1 | 0 | -2.455107 | -4.316554 | 1.463738  |
| 25 | 6 | 0 | -1.368999 | -1.008507 | 3.031732  |
| 26 | 6 | 0 | -1.651630 | -2.072499 | 3.880333  |
| 27 | 1 | 0 | -2.264501 | -4.143873 | 3.948687  |
| 28 | 1 | 0 | -1.037183 | -0.053657 | 3.425292  |
| 29 | 1 | 0 | -1.553132 | -1.950109 | 4.953144  |
| 30 | 7 | 0 | -3.013810 | 0.999052  | -1.002874 |
| 31 | 7 | 0 | -1.474823 | -1.093210 | 1.687505  |
| 32 | 6 | 0 | 1.121570  | -0.831373 | -1.835031 |
| 33 | 1 | 0 | 2.038802  | -1.313307 | -2.191760 |
| 34 | 1 | 0 | 0.782762  | -0.187030 | -2.651622 |
| 35 | 7 | 0 | 1.370932  | 0.012463  | -0.641765 |
| 36 | 6 | 0 | 1.674938  | 1.429825  | -0.940776 |
| 37 | 1 | 0 | 2.726226  | 1.584819  | -1.208338 |
| 38 | 1 | 0 | 1.077379  | 1.729517  | -1.810077 |
| 39 | 6 | 0 | 2.403284  | -0.596565 | 0.292973  |
| 40 | 1 | 0 | 2.394447  | 0.017239  | 1.197831  |
| 41 | 1 | 0 | 2.024473  | -1.582505 | 0.577211  |
| 42 | 6 | 0 | 3.810988  | -0.714670 | -0.248235 |
| 43 | 6 | 0 | 4.735311  | 0.327722  | -0.072190 |
| 44 | 6 | 0 | 4.231967  | -1.880318 | -0.908075 |
| 45 | 6 | 0 | 6.033161  | 0.222529  | -0.573376 |
| 46 | 1 | 0 | 4.449406  | 1.215187  | 0.488043  |
| 47 | 6 | 0 | 5.529339  | -1.987594 | -1.410671 |
| 48 | 1 | 0 | 3.554027  | -2.725939 | -1.002536 |
| 49 | 6 | 0 | 6.429454  | -0.932496 | -1.250677 |
| 50 | 1 | 0 | 6.738906  | 1.033303  | -0.422027 |
| 51 | 1 | 0 | 5.841653  | -2.898492 | -1.911605 |
| 52 | 1 | 0 | 7.441025  | -1.017761 | -1.634560 |
| 53 | 6 | 0 | 1.290270  | 2.314668  | 0.232777  |
| 54 | 6 | 0 | 1.957482  | 3.507999  | 0.503384  |
| 55 | 6 | 0 | 1.526310  | 4.309806  | 1.560080  |
| 56 | 1 | 0 | 2.804889  | 3.802292  | -0.107441 |

|    |   |   |           |          |           |
|----|---|---|-----------|----------|-----------|
| 57 | 6 | 0 | -0.173711 | 2.683374 | 2.002398  |
| 58 | 6 | 0 | 0.437914  | 3.889163 | 2.325137  |
| 59 | 1 | 0 | 2.034898  | 5.241485 | 1.786298  |
| 60 | 1 | 0 | -1.017056 | 2.313904 | 2.577885  |
| 61 | 1 | 0 | 0.073453  | 4.475713 | 3.161117  |
| 62 | 7 | 0 | 0.233751  | 1.904949 | 0.978096  |
| 63 | 1 | 0 | -2.139297 | 0.947204 | -0.425523 |

-----

Ni<sup>I</sup> HNP<sub>y</sub> 2<sub>B</sub> (quartet)E(B3LYP/ SDD-6-31G(d,p))= -1491.21774673 hartree

| Center<br>Number | Atomic<br>Number | Atomic<br>Type | Coordinates (Angstroms) |           |           |
|------------------|------------------|----------------|-------------------------|-----------|-----------|
|                  |                  |                | X                       | Y         | Z         |
| 1                | 7                | 0              | -1.175300               | -1.611359 | -1.156700 |
| 2                | 6                | 0              | -2.144342               | -1.303958 | -2.272111 |
| 3                | 1                | 0              | -1.557217               | -0.887947 | -3.101010 |
| 4                | 1                | 0              | -2.615899               | -2.220759 | -2.642124 |
| 5                | 6                | 0              | -1.755112               | -2.595680 | -0.206343 |
| 6                | 1                | 0              | -2.841435               | -2.452090 | -0.206065 |
| 7                | 1                | 0              | -1.565769               | -3.624527 | -0.536041 |
| 8                | 6                | 0              | 0.169688                | -2.031766 | -1.661092 |
| 9                | 1                | 0              | 0.638288                | -2.647111 | -0.889459 |
| 10               | 1                | 0              | 0.069467                | -2.660528 | -2.554309 |
| 11               | 28               | 0              | -0.828012               | 0.156347  | -0.053533 |
| 12               | 6                | 0              | -3.161353               | -0.325653 | -1.787002 |
| 13               | 6                | 0              | -4.495275               | -0.567371 | -1.591892 |
| 14               | 6                | 0              | -3.460951               | 1.899387  | -0.782426 |
| 15               | 6                | 0              | -5.348260               | 0.395272  | -1.007966 |
| 16               | 1                | 0              | -4.894399               | -1.530084 | -1.899384 |
| 17               | 6                | 0              | -4.783421               | 1.631229  | -0.599534 |
| 18               | 1                | 0              | -2.997657               | 2.846049  | -0.535478 |
| 19               | 1                | 0              | -6.405528               | 0.197773  | -0.885565 |
| 20               | 1                | 0              | -5.407763               | 2.395699  | -0.148628 |
| 21               | 6                | 0              | -1.259232               | -2.382967 | 1.209746  |
| 22               | 6                | 0              | -1.273437               | -3.406247 | 2.155999  |
| 23               | 6                | 0              | -0.898246               | -3.124094 | 3.469291  |
| 24               | 1                | 0              | -1.581158               | -4.406424 | 1.868454  |
| 25               | 6                | 0              | -0.501054               | -0.858835 | 2.804164  |
| 26               | 6                | 0              | -0.508855               | -1.824783 | 3.801667  |
| 27               | 1                | 0              | -0.907310               | -3.906803 | 4.221195  |
| 28               | 1                | 0              | -0.190438               | 0.160279  | 3.008489  |
| 29               | 1                | 0              | -0.210142               | -1.564556 | 4.810829  |
| 30               | 7                | 0              | -2.567747               | 0.926055  | -1.358879 |

|    |   |   |           |           |           |
|----|---|---|-----------|-----------|-----------|
| 31 | 7 | 0 | -0.869077 | -1.128544 | 1.534257  |
| 32 | 6 | 0 | 1.044889  | -0.814307 | -1.971959 |
| 33 | 1 | 0 | 2.036237  | -1.134724 | -2.308868 |
| 34 | 1 | 0 | 0.604720  | -0.233480 | -2.788299 |
| 35 | 7 | 0 | 1.138785  | 0.072521  | -0.774871 |
| 36 | 6 | 0 | 1.426145  | 1.493262  | -1.112538 |
| 37 | 1 | 0 | 2.494347  | 1.654818  | -1.288370 |
| 38 | 1 | 0 | 0.911472  | 1.734145  | -2.050927 |
| 39 | 6 | 0 | 2.124874  | -0.446940 | 0.265948  |
| 40 | 1 | 0 | 2.005431  | 0.200884  | 1.138091  |
| 41 | 1 | 0 | 1.776689  | -1.439667 | 0.556036  |
| 42 | 6 | 0 | 3.573899  | -0.497501 | -0.159183 |
| 43 | 6 | 0 | 4.429367  | 0.588074  | 0.090314  |
| 44 | 6 | 0 | 4.103527  | -1.645511 | -0.770627 |
| 45 | 6 | 0 | 5.770415  | 0.540859  | -0.291787 |
| 46 | 1 | 0 | 4.054449  | 1.463855  | 0.615822  |
| 47 | 6 | 0 | 5.444016  | -1.693900 | -1.154373 |
| 48 | 1 | 0 | 3.476486  | -2.521722 | -0.921309 |
| 49 | 6 | 0 | 6.277219  | -0.597657 | -0.921728 |
| 50 | 1 | 0 | 6.422290  | 1.383582  | -0.084558 |
| 51 | 1 | 0 | 5.841270  | -2.590393 | -1.619579 |
| 52 | 1 | 0 | 7.321806  | -0.637787 | -1.213250 |
| 53 | 6 | 0 | 0.911024  | 2.412343  | -0.019244 |
| 54 | 6 | 0 | 1.512188  | 3.633323  | 0.277754  |
| 55 | 6 | 0 | 0.942701  | 4.452624  | 1.254166  |
| 56 | 1 | 0 | 2.410407  | 3.937894  | -0.249484 |
| 57 | 6 | 0 | -0.754350 | 2.791682  | 1.571064  |
| 58 | 6 | 0 | -0.211134 | 4.025045  | 1.913223  |
| 59 | 1 | 0 | 1.395583  | 5.408085  | 1.499323  |
| 60 | 1 | 0 | -1.650699 | 2.417139  | 2.056065  |
| 61 | 1 | 0 | -0.681935 | 4.630560  | 2.679591  |
| 62 | 7 | 0 | -0.208129 | 2.001046  | 0.624482  |
| 63 | 1 | 0 | -2.046572 | 1.356536  | -2.131477 |

-----  
Ni<sup>I</sup> HNP<sub>y</sub> 2<sub>c</sub>(doublet) E(B3LYP/ SDD-6-31G(d,p))= -1491.25013806 hartree

| Center<br>Number | Atomic<br>Number | Atomic<br>Type | Coordinates (Angstroms) |          |           |
|------------------|------------------|----------------|-------------------------|----------|-----------|
|                  |                  |                | X                       | Y        | Z         |
| 1                | 7                | 0              | 1.239316                | 1.276037 | -1.207833 |
| 2                | 6                | 0              | 2.216815                | 0.712941 | -2.183408 |
| 3                | 1                | 0              | 1.671085                | 0.048308 | -2.860186 |
| 4                | 1                | 0              | 2.662635                | 1.501757 | -2.804732 |



|    |    |   |           |           |           |
|----|----|---|-----------|-----------|-----------|
| 5  | 6  | 0 | 1.855141  | 2.461195  | -0.566604 |
| 6  | 1  | 0 | 2.904951  | 2.219187  | -0.360892 |
| 7  | 1  | 0 | 1.858013  | 3.323909  | -1.246664 |
| 8  | 6  | 0 | -0.068364 | 1.616770  | -1.844312 |
| 9  | 1  | 0 | -0.568321 | 2.340375  | -1.194354 |
| 10 | 1  | 0 | 0.084308  | 2.114360  | -2.811784 |
| 11 | 28 | 0 | 0.873611  | -0.578889 | -0.080594 |
| 12 | 6  | 0 | 3.294436  | -0.084168 | -1.471937 |
| 13 | 6  | 0 | 4.605162  | -0.138811 | -1.938213 |
| 14 | 6  | 0 | 3.783068  | -1.560581 | 0.250217  |
| 15 | 6  | 0 | 5.527526  | -0.950910 | -1.275081 |
| 16 | 1  | 0 | 4.897884  | 0.437226  | -2.810265 |
| 17 | 6  | 0 | 5.107920  | -1.675475 | -0.160548 |
| 18 | 1  | 0 | 3.417690  | -2.111045 | 1.110100  |
| 19 | 1  | 0 | 6.553619  | -1.013557 | -1.622866 |
| 20 | 1  | 0 | 5.789509  | -2.318824 | 0.384599  |
| 21 | 6  | 0 | 1.236905  | 2.894295  | 0.744722  |
| 22 | 6  | 0 | 1.114537  | 4.226297  | 1.128697  |
| 23 | 6  | 0 | 0.637084  | 4.542066  | 2.403588  |
| 24 | 1  | 0 | 1.399128  | 5.009413  | 0.434382  |
| 25 | 6  | 0 | 0.396484  | 2.208187  | 2.870011  |
| 26 | 6  | 0 | 0.274762  | 3.521366  | 3.289411  |
| 27 | 1  | 0 | 0.545307  | 5.581283  | 2.703781  |
| 28 | 1  | 0 | 0.130473  | 1.353328  | 3.480947  |
| 29 | 1  | 0 | -0.099287 | 3.738369  | 4.283250  |
| 30 | 7  | 0 | 2.886711  | -0.782285 | -0.385663 |
| 31 | 7  | 0 | 0.870474  | 1.941288  | 1.633472  |
| 32 | 6  | 0 | -0.962884 | 0.385371  | -2.036381 |
| 33 | 1  | 0 | -1.922154 | 0.705161  | -2.461148 |
| 34 | 1  | 0 | -0.510622 | -0.294395 | -2.764249 |
| 35 | 7  | 0 | -1.134594 | -0.362383 | -0.766099 |
| 36 | 6  | 0 | -1.490520 | -1.789082 | -0.977164 |
| 37 | 1  | 0 | -2.560173 | -1.922716 | -1.170960 |
| 38 | 1  | 0 | -0.957623 | -2.143512 | -1.866948 |
| 39 | 6  | 0 | -2.097816 | 0.304498  | 0.190488  |
| 40 | 1  | 0 | -2.035699 | -0.264735 | 1.122606  |
| 41 | 1  | 0 | -1.699027 | 1.302204  | 0.395533  |
| 42 | 6  | 0 | -3.539586 | 0.411761  | -0.258504 |
| 43 | 6  | 0 | -4.467200 | -0.586368 | 0.078847  |
| 44 | 6  | 0 | -3.984728 | 1.520301  | -0.996007 |
| 45 | 6  | 0 | -5.796171 | -0.495064 | -0.336684 |
| 46 | 1  | 0 | -4.154839 | -1.428427 | 0.692441  |
| 47 | 6  | 0 | -5.312717 | 1.613580  | -1.413899 |
| 48 | 1  | 0 | -3.297904 | 2.332432  | -1.225973 |

|    |   |   |           |           |           |
|----|---|---|-----------|-----------|-----------|
| 49 | 6 | 0 | -6.218826 | 0.601707  | -1.090311 |
| 50 | 1 | 0 | -6.503323 | -1.271609 | -0.062559 |
| 51 | 1 | 0 | -5.642863 | 2.478971  | -1.979889 |
| 52 | 1 | 0 | -7.253260 | 0.675653  | -1.410194 |
| 53 | 6 | 0 | -1.052200 | -2.625088 | 0.211592  |
| 54 | 6 | 0 | -1.756183 | -3.754826 | 0.623391  |
| 55 | 6 | 0 | -1.269816 | -4.509899 | 1.691076  |
| 56 | 1 | 0 | -2.669473 | -4.039163 | 0.110733  |
| 57 | 6 | 0 | 0.549239  | -2.962092 | 1.859599  |
| 58 | 6 | 0 | -0.095731 | -4.102958 | 2.325032  |
| 59 | 1 | 0 | -1.800848 | -5.395450 | 2.025265  |
| 60 | 1 | 0 | 1.462542  | -2.609906 | 2.328696  |
| 61 | 1 | 0 | 0.315001  | -4.654708 | 3.163191  |
| 62 | 7 | 0 | 0.092236  | -2.235577 | 0.821072  |
| 63 | 1 | 0 | 0.925140  | 0.945365  | 1.304433  |

-----

Ni<sup>I</sup> HNP<sub>y</sub> 2<sub>c</sub> (quartet) E(B3LYP/ SDD-6-31G(d,p))= -1491.21618689 hartree

| Center<br>Number | Atomic<br>Number | Atomic<br>Type | Coordinates (Angstroms) |           |           |
|------------------|------------------|----------------|-------------------------|-----------|-----------|
|                  |                  |                | X                       | Y         | Z         |
| 1                | 7                | 0              | -1.209012               | -1.875584 | -0.875647 |
| 2                | 6                | 0              | -2.363673               | -1.729403 | -1.805518 |
| 3                | 1                | 0              | -1.982876               | -1.602401 | -2.825011 |
| 4                | 1                | 0              | -2.962509               | -2.646773 | -1.822090 |
| 5                | 6                | 0              | -1.407147               | -3.000199 | 0.111144  |
| 6                | 1                | 0              | -2.470751               | -2.988592 | 0.386604  |
| 7                | 1                | 0              | -1.200547               | -3.971026 | -0.353328 |
| 8                | 6                | 0              | 0.082685                | -2.003370 | -1.621302 |
| 9                | 1                | 0              | 0.790491                | -2.517458 | -0.968907 |
| 10               | 1                | 0              | -0.043339               | -2.627289 | -2.514087 |
| 11               | 28               | 0              | -0.976918               | -0.089955 | 0.274450  |
| 12               | 6                | 0              | -3.242802               | -0.536761 | -1.489681 |
| 13               | 6                | 0              | -4.522956               | -0.422935 | -2.031705 |
| 14               | 6                | 0              | -3.428593               | 1.564153  | -0.498976 |
| 15               | 6                | 0              | -5.261742               | 0.734647  | -1.796391 |
| 16               | 1                | 0              | -4.929883               | -1.228891 | -2.634201 |
| 17               | 6                | 0              | -4.700974               | 1.751316  | -1.019152 |
| 18               | 1                | 0              | -2.957127               | 2.319750  | 0.119034  |
| 19               | 1                | 0              | -6.258693               | 0.842603  | -2.211751 |
| 20               | 1                | 0              | -5.240843               | 2.668806  | -0.813830 |
| 21               | 6                | 0              | -0.542563               | -2.785108 | 1.309864  |
| 22               | 6                | 0              | 0.508657                | -3.571122 | 1.702408  |

|    |   |   |           |           |           |
|----|---|---|-----------|-----------|-----------|
| 23 | 6 | 0 | 1.322020  | -3.232263 | 2.806305  |
| 24 | 1 | 0 | 0.709881  | -4.478487 | 1.139526  |
| 25 | 6 | 0 | 0.001680  | -1.227747 | 3.136905  |
| 26 | 6 | 0 | 1.039866  | -2.028684 | 3.502694  |
| 27 | 1 | 0 | 2.130946  | -3.880475 | 3.118495  |
| 28 | 1 | 0 | -0.276421 | -0.326224 | 3.667575  |
| 29 | 1 | 0 | 1.643250  | -1.734491 | 4.355293  |
| 30 | 7 | 0 | -2.707481 | 0.442262  | -0.726193 |
| 31 | 7 | 0 | -0.837079 | -1.544696 | 2.006401  |
| 32 | 6 | 0 | 0.619894  | -0.623815 | -2.010188 |
| 33 | 1 | 0 | 1.568919  | -0.720533 | -2.547589 |
| 34 | 1 | 0 | -0.083199 | -0.117077 | -2.678406 |
| 35 | 7 | 0 | 0.772705  | 0.216052  | -0.788818 |
| 36 | 6 | 0 | 0.742236  | 1.677730  | -1.057342 |
| 37 | 1 | 0 | 1.701629  | 2.035295  | -1.444444 |
| 38 | 1 | 0 | -0.013385 | 1.865738  | -1.828793 |
| 39 | 6 | 0 | 1.997947  | -0.163417 | 0.039257  |
| 40 | 1 | 0 | 1.936994  | 0.428477  | 0.955395  |
| 41 | 1 | 0 | 1.871866  | -1.208375 | 0.328511  |
| 42 | 6 | 0 | 3.336432  | 0.041970  | -0.632619 |
| 43 | 6 | 0 | 4.035216  | 1.249647  | -0.474919 |
| 44 | 6 | 0 | 3.925663  | -0.983047 | -1.390236 |
| 45 | 6 | 0 | 5.275775  | 1.439679  | -1.084604 |
| 46 | 1 | 0 | 3.623622  | 2.035541  | 0.154536  |
| 47 | 6 | 0 | 5.165685  | -0.794419 | -2.001342 |
| 48 | 1 | 0 | 3.430429  | -1.947379 | -1.481371 |
| 49 | 6 | 0 | 5.838993  | 0.420111  | -1.854682 |
| 50 | 1 | 0 | 5.809094  | 2.374900  | -0.946607 |
| 51 | 1 | 0 | 5.612247  | -1.598210 | -2.577941 |
| 52 | 1 | 0 | 6.806928  | 0.564776  | -2.323682 |
| 53 | 6 | 0 | 0.356224  | 2.423186  | 0.207065  |
| 54 | 6 | 0 | 0.810949  | 3.709896  | 0.487820  |
| 55 | 6 | 0 | 0.379515  | 4.345976  | 1.652756  |
| 56 | 1 | 0 | 1.492702  | 4.204088  | -0.196683 |
| 57 | 6 | 0 | -0.899759 | 2.388996  | 2.170820  |
| 58 | 6 | 0 | -0.490501 | 3.673013  | 2.512396  |
| 59 | 1 | 0 | 0.722252  | 5.348406  | 1.888881  |
| 60 | 1 | 0 | -1.578031 | 1.830752  | 2.809493  |
| 61 | 1 | 0 | -0.844133 | 4.128762  | 3.430454  |
| 62 | 7 | 0 | -0.491516 | 1.775231  | 1.042119  |
| 63 | 1 | 0 | -1.821492 | -1.536509 | 2.300624  |

-----  
Ni<sup>III</sup>-H 2<sub>p</sub>(doublet) E(B3LYP/ SDD-6-31G(d,p))= -1491.22976025 hartree

| Center<br>Number | Atomic<br>Number | Atomic<br>Type | Coordinates (Angstroms) |           |           |
|------------------|------------------|----------------|-------------------------|-----------|-----------|
|                  |                  |                | X                       | Y         | Z         |
| 1                | 7                | 0              | 0.838886                | -0.660225 | 1.501206  |
| 2                | 6                | 0              | 1.961062                | 0.106103  | 2.107537  |
| 3                | 1                | 0              | 1.633433                | 1.143412  | 2.236363  |
| 4                | 1                | 0              | 2.220073                | -0.281560 | 3.101165  |
| 5                | 6                | 0              | 1.173942                | -2.119215 | 1.451922  |
| 6                | 1                | 0              | 2.261805                | -2.229054 | 1.485039  |
| 7                | 1                | 0              | 0.781188                | -2.634540 | 2.335282  |
| 8                | 6                | 0              | -0.490638               | -0.439916 | 2.157875  |
| 9                | 1                | 0              | -1.048410               | -1.375759 | 2.084176  |
| 10               | 1                | 0              | -0.363156               | -0.228349 | 3.226138  |
| 11               | 28               | 0              | 0.746229                | 0.001253  | -0.463075 |
| 12               | 6                | 0              | 3.156877                | 0.039864  | 1.173008  |
| 13               | 6                | 0              | 4.473605                | 0.102945  | 1.622784  |
| 14               | 6                | 0              | 3.859669                | -0.182857 | -1.036842 |
| 15               | 6                | 0              | 5.510282                | 0.028378  | 0.689156  |
| 16               | 1                | 0              | 4.685458                | 0.201492  | 2.682677  |
| 17               | 6                | 0              | 5.199773                | -0.123377 | -0.662685 |
| 18               | 1                | 0              | 3.567900                | -0.298467 | -2.075837 |
| 19               | 1                | 0              | 6.544280                | 0.075972  | 1.015777  |
| 20               | 1                | 0              | 5.976318                | -0.197771 | -1.415829 |
| 21               | 6                | 0              | 0.679803                | -2.759334 | 0.178158  |
| 22               | 6                | 0              | 0.465567                | -4.132164 | 0.071622  |
| 23               | 6                | 0              | 0.109773                | -4.672480 | -1.163732 |
| 24               | 1                | 0              | 0.583244                | -4.767162 | 0.943767  |
| 25               | 6                | 0              | 0.182646                | -2.459295 | -2.082398 |
| 26               | 6                | 0              | -0.027692               | -3.820858 | -2.260589 |
| 27               | 1                | 0              | -0.057502               | -5.739777 | -1.267551 |
| 28               | 1                | 0              | 0.074833                | -1.762132 | -2.904215 |
| 29               | 1                | 0              | -0.298793               | -4.198527 | -3.240076 |
| 30               | 7                | 0              | 2.859936                | -0.094370 | -0.141124 |
| 31               | 7                | 0              | 0.528732                | -1.935272 | -0.886087 |
| 32               | 6                | 0              | -1.267609               | 0.681742  | 1.481986  |
| 33               | 1                | 0              | -2.273192               | 0.751931  | 1.912797  |
| 34               | 1                | 0              | -0.773893               | 1.639250  | 1.663524  |
| 35               | 7                | 0              | -1.340145               | 0.470424  | 0.002770  |
| 36               | 6                | 0              | -1.608550               | 1.757477  | -0.675661 |
| 37               | 1                | 0              | -1.825602               | 1.543841  | -1.728653 |
| 38               | 1                | 0              | -2.493418               | 2.256056  | -0.263617 |
| 39               | 6                | 0              | -2.365528               | -0.571758 | -0.392680 |
| 40               | 1                | 0              | -2.252280               | -0.702202 | -1.472395 |

|    |   |   |           |           |           |
|----|---|---|-----------|-----------|-----------|
| 41 | 1 | 0 | -2.059955 | -1.509063 | 0.077060  |
| 42 | 6 | 0 | -3.804957 | -0.258849 | -0.045743 |
| 43 | 6 | 0 | -4.623121 | 0.440416  | -0.946742 |
| 44 | 6 | 0 | -4.358648 | -0.692886 | 1.169215  |
| 45 | 6 | 0 | -5.952142 | 0.722047  | -0.629686 |
| 46 | 1 | 0 | -4.231046 | 0.744713  | -1.914463 |
| 47 | 6 | 0 | -5.687258 | -0.410833 | 1.489265  |
| 48 | 1 | 0 | -3.758825 | -1.280957 | 1.861045  |
| 49 | 6 | 0 | -6.484064 | 0.302405  | 0.591633  |
| 50 | 1 | 0 | -6.575776 | 1.254812  | -1.340559 |
| 51 | 1 | 0 | -6.103352 | -0.759227 | 2.429248  |
| 52 | 1 | 0 | -7.520006 | 0.515376  | 0.835190  |
| 53 | 6 | 0 | -0.407530 | 2.666938  | -0.602767 |
| 54 | 6 | 0 | -0.533501 | 4.051956  | -0.699141 |
| 55 | 6 | 0 | 0.611773  | 4.844990  | -0.701110 |
| 56 | 1 | 0 | -1.520610 | 4.495627  | -0.778355 |
| 57 | 6 | 0 | 1.909578  | 2.841071  | -0.491264 |
| 58 | 6 | 0 | 1.857471  | 4.224923  | -0.597133 |
| 59 | 1 | 0 | 0.534137  | 5.924389  | -0.783118 |
| 60 | 1 | 0 | 2.857385  | 2.325916  | -0.416321 |
| 61 | 1 | 0 | 2.777652  | 4.798304  | -0.597833 |
| 62 | 7 | 0 | 0.800020  | 2.072157  | -0.481702 |
| 63 | 1 | 0 | 0.708205  | 0.284778  | -1.865696 |

-----

Ni<sup>III</sup>-H 2<sub>D</sub> (quartet) E(B3LYP/ SDD-6-31G(d,p))= -1491.18472695 hartree

| Center<br>Number | Atomic<br>Number | Atomic<br>Type | Coordinates (Angstroms) |           |           |
|------------------|------------------|----------------|-------------------------|-----------|-----------|
|                  |                  |                | X                       | Y         | Z         |
| 1                | 7                | 0              | 0.819538                | -0.812964 | 1.537700  |
| 2                | 6                | 0              | 1.945937                | -0.123900 | 2.221538  |
| 3                | 1                | 0              | 1.622696                | 0.895524  | 2.461756  |
| 4                | 1                | 0              | 2.199766                | -0.615023 | 3.169637  |
| 5                | 6                | 0              | 1.113029                | -2.265288 | 1.347889  |
| 6                | 1                | 0              | 2.195935                | -2.409104 | 1.418465  |
| 7                | 1                | 0              | 0.668135                | -2.858884 | 2.154094  |
| 8                | 6                | 0              | -0.512072               | -0.580097 | 2.180203  |
| 9                | 1                | 0              | -1.103566               | -1.488570 | 2.052403  |
| 10               | 1                | 0              | -0.399513               | -0.424914 | 3.259644  |
| 11               | 28               | 0              | 0.777248                | 0.073616  | -0.351699 |
| 12               | 6                | 0              | 3.152033                | -0.085952 | 1.298241  |
| 13               | 6                | 0              | 4.461393                | -0.115754 | 1.773420  |
| 14               | 6                | 0              | 3.894644                | -0.020688 | -0.906799 |

|    |   |   |           |           |           |
|----|---|---|-----------|-----------|-----------|
| 15 | 6 | 0 | 5.514905  | -0.084735 | 0.857560  |
| 16 | 1 | 0 | 4.653281  | -0.168627 | 2.840320  |
| 17 | 6 | 0 | 5.227598  | -0.043899 | -0.507441 |
| 18 | 1 | 0 | 3.624522  | 0.007519  | -1.958335 |
| 19 | 1 | 0 | 6.542946  | -0.105854 | 1.205019  |
| 20 | 1 | 0 | 6.016522  | -0.034963 | -1.251229 |
| 21 | 6 | 0 | 0.666274  | -2.773766 | -0.008398 |
| 22 | 6 | 0 | 0.437921  | -4.128847 | -0.243826 |
| 23 | 6 | 0 | 0.132515  | -4.551918 | -1.537387 |
| 24 | 1 | 0 | 0.505748  | -4.841532 | 0.571926  |
| 25 | 6 | 0 | 0.277930  | -2.270340 | -2.248653 |
| 26 | 6 | 0 | 0.057262  | -3.606142 | -2.561511 |
| 27 | 1 | 0 | -0.044790 | -5.602892 | -1.742305 |
| 28 | 1 | 0 | 0.216306  | -1.497991 | -3.010238 |
| 29 | 1 | 0 | -0.174443 | -3.892834 | -3.581102 |
| 30 | 7 | 0 | 2.876823  | -0.030026 | -0.025286 |
| 31 | 7 | 0 | 0.576114  | -1.860114 | -0.999274 |
| 32 | 6 | 0 | -1.239248 | 0.609677  | 1.554355  |
| 33 | 1 | 0 | -2.240706 | 0.698882  | 1.991616  |
| 34 | 1 | 0 | -0.704980 | 1.537415  | 1.779592  |
| 35 | 7 | 0 | -1.321915 | 0.480261  | 0.067053  |
| 36 | 6 | 0 | -1.646091 | 1.793066  | -0.541283 |
| 37 | 1 | 0 | -1.950846 | 1.612738  | -1.578591 |
| 38 | 1 | 0 | -2.501372 | 2.266964  | -0.046112 |
| 39 | 6 | 0 | -2.330032 | -0.564703 | -0.372596 |
| 40 | 1 | 0 | -2.223343 | -0.639378 | -1.458388 |
| 41 | 1 | 0 | -2.000252 | -1.518215 | 0.043901  |
| 42 | 6 | 0 | -3.774027 | -0.301544 | -0.002746 |
| 43 | 6 | 0 | -4.620306 | 0.397278  | -0.877664 |
| 44 | 6 | 0 | -4.305092 | -0.782914 | 1.204649  |
| 45 | 6 | 0 | -5.953709 | 0.633408  | -0.542500 |
| 46 | 1 | 0 | -4.246432 | 0.737355  | -1.840676 |
| 47 | 6 | 0 | -5.637997 | -0.546523 | 1.543111  |
| 48 | 1 | 0 | -3.684643 | -1.372755 | 1.876311  |
| 49 | 6 | 0 | -6.462641 | 0.167615  | 0.671698  |
| 50 | 1 | 0 | -6.598160 | 1.166808  | -1.234067 |
| 51 | 1 | 0 | -6.035598 | -0.931245 | 2.476920  |
| 52 | 1 | 0 | -7.501793 | 0.345036  | 0.929627  |
| 53 | 6 | 0 | -0.457758 | 2.725815  | -0.553502 |
| 54 | 6 | 0 | -0.624116 | 4.107215  | -0.641092 |
| 55 | 6 | 0 | 0.500032  | 4.925128  | -0.736825 |
| 56 | 1 | 0 | -1.623006 | 4.531123  | -0.638951 |
| 57 | 6 | 0 | 1.856903  | 2.955714  | -0.624304 |
| 58 | 6 | 0 | 1.766222  | 4.336334  | -0.731698 |

|    |   |   |          |          |           |
|----|---|---|----------|----------|-----------|
| 59 | 1 | 0 | 0.390839 | 6.002522 | -0.810350 |
| 60 | 1 | 0 | 2.819464 | 2.459897 | -0.605526 |
| 61 | 1 | 0 | 2.668092 | 4.933685 | -0.803727 |
| 62 | 7 | 0 | 0.769544 | 2.156666 | -0.537327 |
| 63 | 1 | 0 | 0.456456 | 0.783860 | -4.210748 |

Ni<sup>III</sup>-H 2<sub>E</sub> (doublet) E(B3LYP/ SDD-6-31G(d,p))= -1491.23380263 hartree

| Center<br>Number | Atomic<br>Number | Atomic<br>Type | Coordinates (Angstroms) |           |           |
|------------------|------------------|----------------|-------------------------|-----------|-----------|
|                  |                  |                | X                       | Y         | Z         |
| 1                | 7                | 0              | 1.321913                | 1.600460  | -1.320840 |
| 2                | 6                | 0              | 2.610651                | 1.229666  | -1.955114 |
| 3                | 1                | 0              | 2.584299                | 1.400440  | -3.038114 |
| 4                | 1                | 0              | 3.391442                | 1.884317  | -1.553532 |
| 5                | 6                | 0              | 1.291943                | 3.003129  | -0.835132 |
| 6                | 1                | 0              | 2.308460                | 3.285896  | -0.542511 |
| 7                | 1                | 0              | 0.981309                | 3.698655  | -1.624225 |
| 8                | 6                | 0              | 0.138786                | 1.292836  | -2.194334 |
| 9                | 1                | 0              | -0.660425               | 1.983714  | -1.917495 |
| 10               | 1                | 0              | 0.381029                | 1.491194  | -3.245451 |
| 11               | 28               | 0              | 1.062872                | 0.364519  | 0.391081  |
| 12               | 6                | 0              | 3.026363                | -0.196597 | -1.655543 |
| 13               | 6                | 0              | 3.985383                | -0.845942 | -2.432977 |
| 14               | 6                | 0              | 2.951015                | -1.985445 | -0.170472 |
| 15               | 6                | 0              | 4.438615                | -2.104984 | -2.044386 |
| 16               | 1                | 0              | 4.378399                | -0.361957 | -3.321489 |
| 17               | 6                | 0              | 3.917533                | -2.681575 | -0.884335 |
| 18               | 1                | 0              | 2.519202                | -2.394116 | 0.735032  |
| 19               | 1                | 0              | 5.189782                | -2.623657 | -2.631405 |
| 20               | 1                | 0              | 4.250215                | -3.652987 | -0.536200 |
| 21               | 6                | 0              | 0.402861                | 3.152188  | 0.384931  |
| 22               | 6                | 0              | -0.153418               | 4.380376  | 0.739222  |
| 23               | 6                | 0              | -0.866616               | 4.487010  | 1.932859  |
| 24               | 1                | 0              | -0.017721               | 5.241612  | 0.092812  |
| 25               | 6                | 0              | -0.449845               | 2.159062  | 2.313298  |
| 26               | 6                | 0              | -1.012855               | 3.356108  | 2.737887  |
| 27               | 1                | 0              | -1.299446               | 5.436908  | 2.229860  |
| 28               | 1                | 0              | -0.548651               | 1.250937  | 2.896894  |
| 29               | 1                | 0              | -1.556414               | 3.394806  | 3.675190  |
| 30               | 7                | 0              | 2.501050                | -0.773326 | -0.555338 |
| 31               | 7                | 0              | 0.236835                | 2.057489  | 1.158700  |
| 32               | 6                | 0              | -0.338087               | -0.149780 | -2.027360 |

|    |   |   |           |           |           |
|----|---|---|-----------|-----------|-----------|
| 33 | 1 | 0 | -1.226555 | -0.324211 | -2.643422 |
| 34 | 1 | 0 | 0.431150  | -0.848609 | -2.363233 |
| 35 | 7 | 0 | -0.615084 | -0.418213 | -0.587243 |
| 36 | 6 | 0 | -0.574966 | -1.864386 | -0.235655 |
| 37 | 1 | 0 | -1.509938 | -2.366762 | -0.501168 |
| 38 | 1 | 0 | 0.222080  | -2.334948 | -0.820296 |
| 39 | 6 | 0 | -1.935513 | 0.194091  | -0.129502 |
| 40 | 1 | 0 | -1.973770 | 0.044238  | 0.951727  |
| 41 | 1 | 0 | -1.862222 | 1.268513  | -0.299082 |
| 42 | 6 | 0 | -3.186955 | -0.353169 | -0.778523 |
| 43 | 6 | 0 | -3.895289 | -1.410545 | -0.185235 |
| 44 | 6 | 0 | -3.694392 | 0.217727  | -1.957145 |
| 45 | 6 | 0 | -5.059470 | -1.907459 | -0.772157 |
| 46 | 1 | 0 | -3.552994 | -1.828825 | 0.758855  |
| 47 | 6 | 0 | -4.857510 | -0.278522 | -2.546531 |
| 48 | 1 | 0 | -3.198523 | 1.076375  | -2.404680 |
| 49 | 6 | 0 | -5.537419 | -1.347088 | -1.958459 |
| 50 | 1 | 0 | -5.600999 | -2.719465 | -0.297333 |
| 51 | 1 | 0 | -5.240881 | 0.177670  | -3.453686 |
| 52 | 1 | 0 | -6.446207 | -1.728619 | -2.412672 |
| 53 | 6 | 0 | -0.265141 | -2.026434 | 1.238718  |
| 54 | 6 | 0 | -0.728707 | -3.101453 | 1.994392  |
| 55 | 6 | 0 | -0.338607 | -3.213438 | 3.330233  |
| 56 | 1 | 0 | -1.382912 | -3.839592 | 1.541875  |
| 57 | 6 | 0 | 0.924847  | -1.194173 | 3.066180  |
| 58 | 6 | 0 | 0.504011  | -2.244229 | 3.876201  |
| 59 | 1 | 0 | -0.689278 | -4.043670 | 3.935129  |
| 60 | 1 | 0 | 1.583861  | -0.419204 | 3.444347  |
| 61 | 1 | 0 | 0.831404  | -2.295706 | 4.908596  |
| 62 | 7 | 0 | 0.548475  | -1.084190 | 1.776473  |
| 63 | 1 | 0 | 2.218241  | 0.863129  | 1.076776  |

-----  
Ni<sup>III</sup>-H 2<sub>E</sub> (quartet) E(B3LYP/ SDD-6-31G(d,p))= -1491.18882130 hartree  
-----

| Center<br>Number | Atomic<br>Number | Atomic<br>Type | Coordinates (Angstroms) |           |           |
|------------------|------------------|----------------|-------------------------|-----------|-----------|
|                  |                  |                | X                       | Y         | Z         |
| 1                | 7                | 0              | -1.251124               | -1.585357 | -1.198761 |
| 2                | 6                | 0              | -2.251605               | -1.171942 | -2.218587 |
| 3                | 1                | 0              | -1.713751               | -0.817804 | -3.104545 |
| 4                | 1                | 0              | -2.852945               | -2.026570 | -2.549545 |
| 5                | 6                | 0              | -1.744880               | -2.711784 | -0.365653 |
| 6                | 1                | 0              | -2.823107               | -2.569980 | -0.223886 |
| 7                | 1                | 0              | -1.614431               | -3.674308 | -0.876500 |



|    |    |   |           |           |           |
|----|----|---|-----------|-----------|-----------|
| 8  | 6  | 0 | 0.089129  | -1.856859 | -1.806262 |
| 9  | 1  | 0 | 0.639168  | -2.504431 | -1.119552 |
| 10 | 1  | 0 | -0.013311 | -2.404352 | -2.751261 |
| 11 | 28 | 0 | -0.896143 | 0.012575  | 0.152594  |
| 12 | 6  | 0 | -3.140338 | -0.044390 | -1.732879 |
| 13 | 6  | 0 | -4.401141 | 0.179647  | -2.281822 |
| 14 | 6  | 0 | -3.323893 | 1.861310  | -0.408489 |
| 15 | 6  | 0 | -5.131120 | 1.295991  | -1.873205 |
| 16 | 1  | 0 | -4.801952 | -0.505528 | -3.021944 |
| 17 | 6  | 0 | -4.579887 | 2.157044  | -0.922516 |
| 18 | 1  | 0 | -2.858165 | 2.494747  | 0.338547  |
| 19 | 1  | 0 | -6.114428 | 1.489824  | -2.289901 |
| 20 | 1  | 0 | -5.113092 | 3.036750  | -0.580148 |
| 21 | 6  | 0 | -1.084009 | -2.735440 | 0.999665  |
| 22 | 6  | 0 | -0.972910 | -3.910591 | 1.740267  |
| 23 | 6  | 0 | -0.435408 | -3.855034 | 3.026415  |
| 24 | 1  | 0 | -1.307249 | -4.852716 | 1.317934  |
| 25 | 6  | 0 | -0.141272 | -1.496946 | 2.732885  |
| 26 | 6  | 0 | -0.015068 | -2.624660 | 3.534510  |
| 27 | 1  | 0 | -0.343698 | -4.758469 | 3.620914  |
| 28 | 1  | 0 | 0.184449  | -0.521471 | 3.078555  |
| 29 | 1  | 0 | 0.408400  | -2.538605 | 4.528860  |
| 30 | 7  | 0 | -2.613178 | 0.782603  | -0.800790 |
| 31 | 7  | 0 | -0.664683 | -1.546103 | 1.491155  |
| 32 | 6  | 0 | 0.851283  | -0.546613 | -2.029317 |
| 33 | 1  | 0 | 1.826119  | -0.746740 | -2.485671 |
| 34 | 1  | 0 | 0.300895  | 0.097293  | -2.722069 |
| 35 | 7  | 0 | 0.995629  | 0.182717  | -0.737708 |
| 36 | 6  | 0 | 1.122554  | 1.657049  | -0.892640 |
| 37 | 1  | 0 | 2.136096  | 1.947164  | -1.187212 |
| 38 | 1  | 0 | 0.446926  | 1.974120  | -1.695855 |
| 39 | 6  | 0 | 2.123931  | -0.376696 | 0.118566  |
| 40 | 1  | 0 | 2.051096  | 0.133685  | 1.081936  |
| 41 | 1  | 0 | 1.888695  | -1.427611 | 0.296320  |
| 42 | 6  | 0 | 3.519034  | -0.237630 | -0.447275 |
| 43 | 6  | 0 | 4.302777  | 0.888629  | -0.148770 |
| 44 | 6  | 0 | 4.073379  | -1.249603 | -1.247667 |
| 45 | 6  | 0 | 5.592309  | 1.017086  | -0.665618 |
| 46 | 1  | 0 | 3.915556  | 1.656487  | 0.517404  |
| 47 | 6  | 0 | 5.362454  | -1.122552 | -1.766326 |
| 48 | 1  | 0 | 3.509811  | -2.159261 | -1.444008 |
| 49 | 6  | 0 | 6.120580  | 0.015005  | -1.482113 |
| 50 | 1  | 0 | 6.189697  | 1.889291  | -0.419557 |
| 51 | 1  | 0 | 5.779807  | -1.916167 | -2.377851 |

|    |   |   |           |          |           |
|----|---|---|-----------|----------|-----------|
| 52 | 1 | 0 | 7.125928  | 0.111287 | -1.879342 |
| 53 | 6 | 0 | 0.714921  | 2.349137 | 0.395985  |
| 54 | 6 | 0 | 1.281998  | 3.550646 | 0.815685  |
| 55 | 6 | 0 | 0.823888  | 4.145272 | 1.992520  |
| 56 | 1 | 0 | 2.069577  | 4.011709 | 0.228619  |
| 57 | 6 | 0 | -0.701716 | 2.316396 | 2.247861  |
| 58 | 6 | 0 | -0.184323 | 3.516224 | 2.724541  |
| 59 | 1 | 0 | 1.252398  | 5.081540 | 2.335876  |
| 60 | 1 | 0 | -1.487205 | 1.790228 | 2.783601  |
| 61 | 1 | 0 | -0.562593 | 3.941466 | 3.647455  |
| 62 | 7 | 0 | -0.267216 | 1.745286 | 1.106668  |
| 63 | 1 | 0 | -3.646674 | 0.310128 | 3.417672  |

-----  
Ni<sup>III</sup>-H 2<sub>F</sub>(doublet) E(B3LYP/ SDD-6-31G(d,p))= -1491.23142826 hartree  
-----

| Center<br>Number | Atomic<br>Number | Atomic<br>Type | Coordinates (Angstroms) |           |           |
|------------------|------------------|----------------|-------------------------|-----------|-----------|
|                  |                  |                | X                       | Y         | Z         |
| 1                | 7                | 0              | 1.056375                | -1.991441 | 0.182578  |
| 2                | 6                | 0              | 1.932243                | -2.015917 | 1.391797  |
| 3                | 1                | 0              | 1.633435                | -2.832738 | 2.058932  |
| 4                | 1                | 0              | 2.956063                | -2.240692 | 1.073929  |
| 5                | 6                | 0              | 1.765211                | -2.545259 | -0.999326 |
| 6                | 1                | 0              | 2.232937                | -3.513337 | -0.781721 |
| 7                | 1                | 0              | 1.028387                | -2.709171 | -1.792598 |
| 8                | 6                | 0              | -0.287962               | -2.582799 | 0.443551  |
| 9                | 1                | 0              | -0.699001               | -2.916296 | -0.511233 |
| 10               | 1                | 0              | -0.209974               | -3.466922 | 1.087198  |
| 11               | 28               | 0              | 0.691391                | 0.021882  | -0.342591 |
| 12               | 6                | 0              | 1.964122                | -0.705270 | 2.145859  |
| 13               | 6                | 0              | 2.532685                | -0.624266 | 3.418026  |
| 14               | 6                | 0              | 1.592114                | 1.589475  | 2.116040  |
| 15               | 6                | 0              | 2.632974                | 0.617093  | 4.041337  |
| 16               | 1                | 0              | 2.897671                | -1.522400 | 3.906167  |
| 17               | 6                | 0              | 2.159913                | 1.748544  | 3.372735  |
| 18               | 1                | 0              | 1.205894                | 2.438773  | 1.564262  |
| 19               | 1                | 0              | 3.074522                | 0.701643  | 5.029179  |
| 20               | 1                | 0              | 2.224375                | 2.735869  | 3.816010  |
| 21               | 6                | 0              | 2.804966                | -1.547586 | -1.476528 |
| 22               | 6                | 0              | 3.984270                | -1.941725 | -2.104195 |
| 23               | 6                | 0              | 4.881908                | -0.967121 | -2.541604 |
| 24               | 1                | 0              | 4.193774                | -2.996739 | -2.248762 |
| 25               | 6                | 0              | 3.392983                | 0.697081  | -1.674051 |
| 26               | 6                | 0              | 4.584299                | 0.376867  | -2.315817 |

|    |   |   |           |           |           |
|----|---|---|-----------|-----------|-----------|
| 27 | 1 | 0 | 5.802677  | -1.253531 | -3.039554 |
| 28 | 1 | 0 | 3.133053  | 1.727769  | -1.461011 |
| 29 | 1 | 0 | 5.260943  | 1.166088  | -2.623737 |
| 30 | 7 | 0 | 1.486294  | 0.386377  | 1.511724  |
| 31 | 7 | 0 | 2.516926  | -0.241640 | -1.270931 |
| 32 | 6 | 0 | -1.216513 | -1.546403 | 1.089111  |
| 33 | 1 | 0 | -2.199909 | -1.989506 | 1.276036  |
| 34 | 1 | 0 | -0.816648 | -1.226338 | 2.054804  |
| 35 | 7 | 0 | -1.322928 | -0.352798 | 0.207657  |
| 36 | 6 | 0 | -1.692507 | 0.899706  | 0.910291  |
| 37 | 1 | 0 | -2.770017 | 0.955796  | 1.093697  |
| 38 | 1 | 0 | -1.194044 | 0.909291  | 1.884746  |
| 39 | 6 | 0 | -2.259421 | -0.595207 | -0.979385 |
| 40 | 1 | 0 | -2.152913 | 0.277266  | -1.627523 |
| 41 | 1 | 0 | -1.854279 | -1.447658 | -1.527674 |
| 42 | 6 | 0 | -3.712059 | -0.829217 | -0.638818 |
| 43 | 6 | 0 | -4.619221 | 0.242516  | -0.605031 |
| 44 | 6 | 0 | -4.195313 | -2.126203 | -0.399117 |
| 45 | 6 | 0 | -5.964700 | 0.029113  | -0.304400 |
| 46 | 1 | 0 | -4.278971 | 1.246588  | -0.848630 |
| 47 | 6 | 0 | -5.540192 | -2.341823 | -0.097649 |
| 48 | 1 | 0 | -3.526870 | -2.980692 | -0.480392 |
| 49 | 6 | 0 | -6.425099 | -1.262942 | -0.042344 |
| 50 | 1 | 0 | -6.655896 | 0.865879  | -0.291138 |
| 51 | 1 | 0 | -5.900214 | -3.350646 | 0.077323  |
| 52 | 1 | 0 | -7.473025 | -1.430984 | 0.184437  |
| 53 | 6 | 0 | -1.232828 | 2.088696  | 0.084298  |
| 54 | 6 | 0 | -1.929080 | 3.295447  | 0.060045  |
| 55 | 6 | 0 | -1.450960 | 4.344049  | -0.727220 |
| 56 | 1 | 0 | -2.837312 | 3.405462  | 0.643781  |
| 57 | 6 | 0 | 0.347497  | 2.918408  | -1.413342 |
| 58 | 6 | 0 | -0.296352 | 4.148977  | -1.485768 |
| 59 | 1 | 0 | -1.981051 | 5.290545  | -0.761375 |
| 60 | 1 | 0 | 1.235024  | 2.717452  | -2.002568 |
| 61 | 1 | 0 | 0.096788  | 4.927706  | -2.129657 |
| 62 | 7 | 0 | -0.096424 | 1.916033  | -0.631176 |
| 63 | 1 | 0 | 0.216063  | -0.302295 | -1.640335 |

-----  
Ni<sup>III</sup>-H 2<sub>F</sub>(quartet) E(B3LYP/ SDD-6-31G(d,p))= -1491.18681144 hartree

-----  
Center Atomic Atomic Coordinates (Angstroms)  
Number Number Type X Y Z  
-----

|    |    |   |           |           |           |
|----|----|---|-----------|-----------|-----------|
| 1  | 7  | 0 | 1.049155  | -1.857090 | 0.574887  |
| 2  | 6  | 0 | 2.084150  | -1.708084 | 1.637917  |
| 3  | 1  | 0 | 1.960887  | -2.479431 | 2.407022  |
| 4  | 1  | 0 | 3.065381  | -1.877441 | 1.180699  |
| 5  | 6  | 0 | 1.568683  | -2.658743 | -0.563692 |
| 6  | 1  | 0 | 2.029254  | -3.597151 | -0.230140 |
| 7  | 1  | 0 | 0.720529  | -2.930108 | -1.203404 |
| 8  | 6  | 0 | -0.263767 | -2.340056 | 1.108651  |
| 9  | 1  | 0 | -0.745751 | -2.933605 | 0.329735  |
| 10 | 1  | 0 | -0.115667 | -3.007340 | 1.965276  |
| 11 | 28 | 0 | 0.720321  | 0.090386  | -0.226391 |
| 12 | 6  | 0 | 2.110533  | -0.330147 | 2.266442  |
| 13 | 6  | 0 | 2.685337  | -0.111206 | 3.518167  |
| 14 | 6  | 0 | 1.727887  | 1.948849  | 1.989682  |
| 15 | 6  | 0 | 2.784812  | 1.192744  | 4.001231  |
| 16 | 1  | 0 | 3.055072  | -0.949285 | 4.100286  |
| 17 | 6  | 0 | 2.303922  | 2.244569  | 3.218764  |
| 18 | 1  | 0 | 1.332667  | 2.730109  | 1.349568  |
| 19 | 1  | 0 | 3.231408  | 1.385148  | 4.971554  |
| 20 | 1  | 0 | 2.367801  | 3.273752  | 3.553672  |
| 21 | 6  | 0 | 2.557538  | -1.841707 | -1.376037 |
| 22 | 6  | 0 | 3.604364  | -2.440124 | -2.073089 |
| 23 | 6  | 0 | 4.461311  | -1.642772 | -2.832668 |
| 24 | 1  | 0 | 3.746485  | -3.514701 | -2.020220 |
| 25 | 6  | 0 | 3.197669  | 0.263989  | -2.126965 |
| 26 | 6  | 0 | 4.257655  | -0.262995 | -2.855309 |
| 27 | 1  | 0 | 5.280757  | -2.090448 | -3.385892 |
| 28 | 1  | 0 | 3.022151  | 1.333459  | -2.099691 |
| 29 | 1  | 0 | 4.908697  | 0.396189  | -3.418382 |
| 30 | 7  | 0 | 1.627989  | 0.687400  | 1.522574  |
| 31 | 7  | 0 | 2.351429  | -0.502166 | -1.409992 |
| 32 | 6  | 0 | -1.167221 | -1.169375 | 1.516996  |
| 33 | 1  | 0 | -2.152502 | -1.546900 | 1.811824  |
| 34 | 1  | 0 | -0.743353 | -0.648691 | 2.379386  |
| 35 | 7  | 0 | -1.267540 | -0.191068 | 0.400883  |
| 36 | 6  | 0 | -1.703620 | 1.159810  | 0.827478  |
| 37 | 1  | 0 | -2.787371 | 1.210311  | 0.974450  |
| 38 | 1  | 0 | -1.233714 | 1.378523  | 1.792723  |
| 39 | 6  | 0 | -2.116698 | -0.699331 | -0.759177 |
| 40 | 1  | 0 | -2.024010 | 0.046126  | -1.553277 |
| 41 | 1  | 0 | -1.641492 | -1.613165 | -1.127021 |
| 42 | 6  | 0 | -3.575517 | -0.954485 | -0.453266 |
| 43 | 6  | 0 | -4.531191 | 0.052048  | -0.665245 |
| 44 | 6  | 0 | -4.007955 | -2.206704 | 0.011527  |

|    |   |   |           |           |           |
|----|---|---|-----------|-----------|-----------|
| 45 | 6 | 0 | -5.879831 | -0.176933 | -0.390150 |
| 46 | 1 | 0 | -4.225289 | 1.010809  | -1.077966 |
| 47 | 6 | 0 | -5.355918 | -2.437219 | 0.287644  |
| 48 | 1 | 0 | -3.296380 | -3.020688 | 0.131846  |
| 49 | 6 | 0 | -6.292656 | -1.419950 | 0.093487  |
| 50 | 1 | 0 | -6.608897 | 0.607279  | -0.567798 |
| 51 | 1 | 0 | -5.676666 | -3.412813 | 0.638827  |
| 52 | 1 | 0 | -7.342350 | -1.601294 | 0.300930  |
| 53 | 6 | 0 | -1.253890 | 2.187414  | -0.194881 |
| 54 | 6 | 0 | -1.968888 | 3.359467  | -0.431135 |
| 55 | 6 | 0 | -1.492578 | 4.272878  | -1.372397 |
| 56 | 1 | 0 | -2.888645 | 3.549134  | 0.112663  |
| 57 | 6 | 0 | 0.341944  | 2.789919  | -1.779399 |
| 58 | 6 | 0 | -0.317762 | 3.979588  | -2.065166 |
| 59 | 1 | 0 | -2.036596 | 5.190971  | -1.570467 |
| 60 | 1 | 0 | 1.250079  | 2.520602  | -2.306390 |
| 61 | 1 | 0 | 0.079833  | 4.652198  | -2.816808 |
| 62 | 7 | 0 | -0.102555 | 1.912236  | -0.857534 |
| 63 | 1 | 0 | -0.860553 | -3.246209 | -3.136253 |

-----  
**2<sub>dp</sub>** (doublet) E(B3LYP/ SDD-6-31G(d,p))= -1490.95436955 hartree

| Center<br>Number | Atomic<br>Number | Atomic<br>Type | Coordinates (Angstroms) |           |           |
|------------------|------------------|----------------|-------------------------|-----------|-----------|
|                  |                  |                | X                       | Y         | Z         |
| 1                | 7                | 0              | -1.258897               | -1.558146 | -1.131226 |
| 2                | 6                | 0              | -2.221362               | -1.158060 | -2.175558 |
| 3                | 1                | 0              | -1.658936               | -0.672887 | -2.980833 |
| 4                | 1                | 0              | -2.726568               | -2.026282 | -2.623899 |
| 5                | 6                | 0              | -1.820186               | -2.591959 | -0.238259 |
| 6                | 1                | 0              | -2.890167               | -2.378683 | -0.127152 |
| 7                | 1                | 0              | -1.738551               | -3.599410 | -0.672850 |
| 8                | 6                | 0              | 0.069554                | -1.927154 | -1.675770 |
| 9                | 1                | 0              | 0.569582                | -2.544485 | -0.924398 |
| 10               | 1                | 0              | -0.026695               | -2.546875 | -2.580090 |
| 11               | 28               | 0              | -0.971164               | 0.185966  | 0.114868  |
| 12               | 6                | 0              | -3.237042               | -0.162005 | -1.650617 |
| 13               | 6                | 0              | -4.528990               | -0.090844 | -2.166379 |
| 14               | 6                | 0              | -3.628199               | 1.656802  | -0.273645 |
| 15               | 6                | 0              | -5.391637               | 0.908576  | -1.714885 |
| 16               | 1                | 0              | -4.850184               | -0.806088 | -2.917476 |
| 17               | 6                | 0              | -4.925394               | 1.804478  | -0.752761 |
| 18               | 1                | 0              | -3.231882               | 2.330346  | 0.479614  |

|    |   |   |           |           |           |
|----|---|---|-----------|-----------|-----------|
| 19 | 1 | 0 | -6.401430 | 0.984565  | -2.104761 |
| 20 | 1 | 0 | -5.554178 | 2.601743  | -0.371414 |
| 21 | 6 | 0 | -1.193602 | -2.555779 | 1.142611  |
| 22 | 6 | 0 | -1.040497 | -3.711025 | 1.908629  |
| 23 | 6 | 0 | -0.536491 | -3.606415 | 3.205246  |
| 24 | 1 | 0 | -1.317121 | -4.676136 | 1.495430  |
| 25 | 6 | 0 | -0.364600 | -1.242701 | 2.857279  |
| 26 | 6 | 0 | -0.194620 | -2.344735 | 3.690845  |
| 27 | 1 | 0 | -0.411455 | -4.491540 | 3.820777  |
| 28 | 1 | 0 | -0.101121 | -0.243278 | 3.191849  |
| 29 | 1 | 0 | 0.201964  | -2.212472 | 4.691686  |
| 30 | 7 | 0 | -2.788146 | 0.692453  | -0.700671 |
| 31 | 7 | 0 | -0.852795 | -1.333856 | 1.607353  |
| 32 | 6 | 0 | 0.931174  | -0.693787 | -1.988790 |
| 33 | 1 | 0 | 1.878946  | -1.025448 | -2.435269 |
| 34 | 1 | 0 | 0.431133  | -0.078942 | -2.742782 |
| 35 | 7 | 0 | 1.133002  | 0.138368  | -0.788353 |
| 36 | 6 | 0 | 1.293720  | 1.576622  | -1.051769 |
| 37 | 1 | 0 | 2.316046  | 1.848964  | -1.348557 |
| 38 | 1 | 0 | 0.633531  | 1.838138  | -1.886951 |
| 39 | 6 | 0 | 2.174693  | -0.391715 | 0.144583  |
| 40 | 1 | 0 | 2.100961  | 0.201426  | 1.060950  |
| 41 | 1 | 0 | 1.879675  | -1.409671 | 0.411851  |
| 42 | 6 | 0 | 3.604869  | -0.383738 | -0.361718 |
| 43 | 6 | 0 | 4.439162  | 0.722272  | -0.137627 |
| 44 | 6 | 0 | 4.132293  | -1.486577 | -1.050785 |
| 45 | 6 | 0 | 5.751194  | 0.738927  | -0.612746 |
| 46 | 1 | 0 | 4.065694  | 1.568116  | 0.435016  |
| 47 | 6 | 0 | 5.443642  | -1.473888 | -1.528264 |
| 48 | 1 | 0 | 3.520995  | -2.374578 | -1.195189 |
| 49 | 6 | 0 | 6.254248  | -0.357510 | -1.315367 |
| 50 | 1 | 0 | 6.383758  | 1.601334  | -0.424492 |
| 51 | 1 | 0 | 5.835576  | -2.338807 | -2.054996 |
| 52 | 1 | 0 | 7.276255  | -0.348131 | -1.681493 |
| 53 | 6 | 0 | 0.871726  | 2.401857  | 0.152208  |
| 54 | 6 | 0 | 1.524351  | 3.583849  | 0.499310  |
| 55 | 6 | 0 | 1.061113  | 4.332899  | 1.581821  |
| 56 | 1 | 0 | 2.383388  | 3.911849  | -0.077455 |
| 57 | 6 | 0 | -0.634410 | 2.671986  | 1.896084  |
| 58 | 6 | 0 | -0.040327 | 3.865871  | 2.296820  |
| 59 | 1 | 0 | 1.554419  | 5.257805  | 1.863318  |
| 60 | 1 | 0 | -1.490114 | 2.266518  | 2.428628  |
| 61 | 1 | 0 | -0.433228 | 4.407604  | 3.150282  |
| 62 | 7 | 0 | -0.200875 | 1.951289  | 0.844522  |

-----  
**2<sub>dp</sub>** (quartet) E(B3LYP/ SDD-6-31G(d,p))= -1490.91221472 hartree  
-----

| Center<br>Number | Atomic<br>Number | Atomic<br>Type | Coordinates (Angstroms) |           |           |
|------------------|------------------|----------------|-------------------------|-----------|-----------|
|                  |                  |                | X                       | Y         | Z         |
| 1                | 7                | 0              | -1.209009               | -1.669643 | -1.015491 |
| 2                | 6                | 0              | -2.237062               | -1.405252 | -2.051416 |
| 3                | 1                | 0              | -1.730306               | -0.907454 | -2.889763 |
| 4                | 1                | 0              | -2.668960               | -2.336239 | -2.442741 |
| 5                | 6                | 0              | -1.729163               | -2.575248 | 0.048469  |
| 6                | 1                | 0              | -2.808890               | -2.378139 | 0.114590  |
| 7                | 1                | 0              | -1.608974               | -3.630350 | -0.228770 |
| 8                | 6                | 0              | 0.100830                | -2.111300 | -1.563718 |
| 9                | 1                | 0              | 0.599559                | -2.693895 | -0.785478 |
| 10               | 1                | 0              | -0.036287               | -2.777861 | -2.425990 |
| 11               | 28               | 0              | -0.906114               | 0.201131  | -0.055656 |
| 12               | 6                | 0              | -3.310681               | -0.496339 | -1.501876 |
| 13               | 6                | 0              | -4.623463               | -0.535169 | -1.954420 |
| 14               | 6                | 0              | -3.782837               | 1.358649  | -0.158056 |
| 15               | 6                | 0              | -5.542452               | 0.412178  | -1.495863 |
| 16               | 1                | 0              | -4.921990               | -1.299537 | -2.665763 |
| 17               | 6                | 0              | -5.099025               | 1.382053  | -0.578342 |
| 18               | 1                | 0              | -3.408139               | 2.091404  | 0.548155  |
| 19               | 1                | 0              | -6.571544               | 0.396169  | -1.836746 |
| 20               | 1                | 0              | -5.772743               | 2.138164  | -0.190638 |
| 21               | 6                | 0              | -1.078609               | -2.280183 | 1.372651  |
| 22               | 6                | 0              | -0.801803               | -3.264636 | 2.318281  |
| 23               | 6                | 0              | -0.302002               | -2.901706 | 3.568202  |
| 24               | 1                | 0              | -0.991656               | -4.306321 | 2.076997  |
| 25               | 6                | 0              | -0.350921               | -0.611340 | 2.840798  |
| 26               | 6                | 0              | -0.079624               | -1.537014 | 3.832552  |
| 27               | 1                | 0              | -0.087362               | -3.655219 | 4.318002  |
| 28               | 1                | 0              | -0.175021               | 0.448629  | 2.995425  |
| 29               | 1                | 0              | 0.300557                | -1.203300 | 4.791484  |
| 30               | 7                | 0              | -2.881050               | 0.442399  | -0.599663 |
| 31               | 7                | 0              | -0.843153               | -0.956807 | 1.628050  |
| 32               | 6                | 0              | 0.974316                | -0.915289 | -1.965655 |
| 33               | 1                | 0              | 1.950692                | -1.268080 | -2.318538 |
| 34               | 1                | 0              | 0.508477                | -0.384454 | -2.801176 |
| 35               | 7                | 0              | 1.108078                | 0.045356  | -0.840488 |
| 36               | 6                | 0              | 1.328052                | 1.450229  | -1.284882 |
| 37               | 1                | 0              | 2.365904                | 1.630267  | -1.584945 |

|    |   |   |           |           |           |
|----|---|---|-----------|-----------|-----------|
| 38 | 1 | 0 | 0.699873  | 1.605286  | -2.173680 |
| 39 | 6 | 0 | 2.116007  | -0.382723 | 0.195487  |
| 40 | 1 | 0 | 2.015299  | 0.323744  | 1.022742  |
| 41 | 1 | 0 | 1.793113  | -1.356438 | 0.570486  |
| 42 | 6 | 0 | 3.558488  | -0.448948 | -0.261132 |
| 43 | 6 | 0 | 4.397241  | 0.670324  | -0.143653 |
| 44 | 6 | 0 | 4.096213  | -1.636004 | -0.781885 |
| 45 | 6 | 0 | 5.727179  | 0.613775  | -0.561935 |
| 46 | 1 | 0 | 4.011319  | 1.585258  | 0.299450  |
| 47 | 6 | 0 | 5.425595  | -1.695445 | -1.202211 |
| 48 | 1 | 0 | 3.479642  | -2.530459 | -0.836631 |
| 49 | 6 | 0 | 6.242033  | -0.567891 | -1.098460 |
| 50 | 1 | 0 | 6.363744  | 1.487291  | -0.458420 |
| 51 | 1 | 0 | 5.826440  | -2.623647 | -1.598003 |
| 52 | 1 | 0 | 7.277896  | -0.614296 | -1.419923 |
| 53 | 6 | 0 | 0.892878  | 2.415796  | -0.207092 |
| 54 | 6 | 0 | 1.537735  | 3.617460  | 0.035584  |
| 55 | 6 | 0 | 1.020987  | 4.505243  | 0.991910  |
| 56 | 1 | 0 | 2.433230  | 3.865921  | -0.526012 |
| 57 | 6 | 0 | -0.729361 | 2.908504  | 1.408162  |
| 58 | 6 | 0 | -0.138195 | 4.127540  | 1.687775  |
| 59 | 1 | 0 | 1.508084  | 5.453120  | 1.189997  |
| 60 | 1 | 0 | -1.616220 | 2.579271  | 1.940727  |
| 61 | 1 | 0 | -0.573767 | 4.771925  | 2.443879  |
| 62 | 7 | 0 | -0.241281 | 2.049265  | 0.469591  |

-----

**3<sub>A</sub>** (singlet) E(B3LYP/ SDD-6-31G(d,p))= -1491.83263048 hartree

| Center<br>Number | Atomic<br>Number | Atomic<br>Type | Coordinates (Angstroms) |           |           |
|------------------|------------------|----------------|-------------------------|-----------|-----------|
|                  |                  |                | X                       | Y         | Z         |
| 1                | 7                | 0              | -1.784795               | -1.215089 | -1.192855 |
| 2                | 6                | 0              | -2.566992               | -0.485542 | -2.234400 |
| 3                | 1                | 0              | -2.143850               | -0.645753 | -3.232692 |
| 4                | 1                | 0              | -3.583189               | -0.893216 | -2.260090 |
| 5                | 6                | 0              | -2.424149               | -2.498833 | -0.766438 |
| 6                | 1                | 0              | -3.509279               | -2.352801 | -0.758771 |
| 7                | 1                | 0              | -2.205817               | -3.314859 | -1.466294 |
| 8                | 6                | 0              | -0.379243               | -1.498353 | -1.647239 |
| 9                | 1                | 0              | 0.035580                | -2.235033 | -0.957579 |
| 10               | 1                | 0              | -0.434977               | -1.982532 | -2.631524 |
| 11               | 28               | 0              | -1.850385               | -0.105300 | 0.476887  |
| 12               | 6                | 0              | -2.663384               | 0.989791  | -1.916052 |



|    |   |   |           |           |           |
|----|---|---|-----------|-----------|-----------|
| 13 | 6 | 0 | -3.095278 | 1.920653  | -2.858501 |
| 14 | 6 | 0 | -2.577572 | 2.632340  | -0.262781 |
| 15 | 6 | 0 | -3.274417 | 3.247739  | -2.472987 |
| 16 | 1 | 0 | -3.302218 | 1.603255  | -3.875515 |
| 17 | 6 | 0 | -3.018190 | 3.606410  | -1.148280 |
| 18 | 1 | 0 | -2.382270 | 2.856655  | 0.777625  |
| 19 | 1 | 0 | -3.617924 | 3.986051  | -3.190406 |
| 20 | 1 | 0 | -3.164350 | 4.622840  | -0.800529 |
| 21 | 6 | 0 | -1.974719 | -2.833192 | 0.637634  |
| 22 | 6 | 0 | -1.934036 | -4.129564 | 1.138989  |
| 23 | 6 | 0 | -1.597201 | -4.328112 | 2.479059  |
| 24 | 1 | 0 | -2.172263 | -4.968390 | 0.493328  |
| 25 | 6 | 0 | -1.355239 | -1.952620 | 2.708128  |
| 26 | 6 | 0 | -1.306796 | -3.220721 | 3.275386  |
| 27 | 1 | 0 | -1.565961 | -5.330656 | 2.893334  |
| 28 | 1 | 0 | -1.149667 | -1.062048 | 3.287371  |
| 29 | 1 | 0 | -1.049745 | -3.330826 | 4.322804  |
| 30 | 7 | 0 | -2.388308 | 1.345926  | -0.635478 |
| 31 | 7 | 0 | -1.676718 | -1.756818 | 1.412622  |
| 32 | 6 | 0 | 0.556986  | -0.292421 | -1.755854 |
| 33 | 1 | 0 | 1.388816  | -0.589636 | -2.410987 |
| 34 | 1 | 0 | 0.042680  | 0.527350  | -2.266908 |
| 35 | 7 | 0 | 1.049886  | 0.213346  | -0.459150 |
| 36 | 6 | 0 | 1.620222  | 1.555554  | -0.598892 |
| 37 | 1 | 0 | 2.632986  | 1.561951  | -1.026711 |
| 38 | 1 | 0 | 0.987839  | 2.136293  | -1.282604 |
| 39 | 6 | 0 | 2.003594  | -0.722722 | 0.231022  |
| 40 | 1 | 0 | 2.214940  | -0.285043 | 1.212432  |
| 41 | 1 | 0 | 1.458349  | -1.648991 | 0.428339  |
| 42 | 6 | 0 | 3.307384  | -1.021430 | -0.482605 |
| 43 | 6 | 0 | 4.453561  | -0.252016 | -0.228640 |
| 44 | 6 | 0 | 3.403508  | -2.080321 | -1.399053 |
| 45 | 6 | 0 | 5.654300  | -0.514650 | -0.889899 |
| 46 | 1 | 0 | 4.418606  | 0.538445  | 0.518556  |
| 47 | 6 | 0 | 4.601751  | -2.345444 | -2.063130 |
| 48 | 1 | 0 | 2.545305  | -2.725082 | -1.576045 |
| 49 | 6 | 0 | 5.727862  | -1.558268 | -1.814078 |
| 50 | 1 | 0 | 6.534388  | 0.082870  | -0.673426 |
| 51 | 1 | 0 | 4.661223  | -3.173708 | -2.762252 |
| 52 | 1 | 0 | 6.662381  | -1.768689 | -2.324201 |
| 53 | 6 | 0 | 1.653139  | 2.301414  | 0.718326  |
| 54 | 6 | 0 | 2.597821  | 3.268861  | 1.050531  |
| 55 | 6 | 0 | 2.503971  | 3.939783  | 2.271231  |
| 56 | 1 | 0 | 3.399843  | 3.487490  | 0.354031  |

|    |   |   |           |          |          |
|----|---|---|-----------|----------|----------|
| 57 | 6 | 0 | 0.547041  | 2.669420 | 2.800095 |
| 58 | 6 | 0 | 1.465473  | 3.637764 | 3.161390 |
| 59 | 1 | 0 | 3.240797  | 4.693048 | 2.532431 |
| 60 | 1 | 0 | -0.289760 | 2.365752 | 3.418474 |
| 61 | 1 | 0 | 1.373525  | 4.140812 | 4.116810 |
| 62 | 7 | 0 | 0.668424  | 2.043783 | 1.608263 |
| 63 | 1 | 0 | -0.024515 | 1.319398 | 1.348984 |
| 64 | 1 | 0 | -1.846483 | 0.702300 | 1.707596 |

-----  
**3<sub>A</sub>**(triplet) E(B3LYP/ SDD-6-31G(d,p))= -1491.837405 hartree  
 -----

| Center<br>Number | Atomic<br>Number | Atomic<br>Type | Coordinates (Angstroms) |           |           |
|------------------|------------------|----------------|-------------------------|-----------|-----------|
|                  |                  |                | X                       | Y         | Z         |
| 1                | 7                | 0              | -1.690056               | -1.190789 | -1.119443 |
| 2                | 6                | 0              | -2.590667               | -0.627430 | -2.156314 |
| 3                | 1                | 0              | -1.975162               | -0.131536 | -2.915090 |
| 4                | 1                | 0              | -3.150740               | -1.417399 | -2.673654 |
| 5                | 6                | 0              | -2.418133               | -2.176545 | -0.274697 |
| 6                | 1                | 0              | -3.474290               | -1.886503 | -0.255027 |
| 7                | 1                | 0              | -2.374241               | -3.180822 | -0.714168 |
| 8                | 6                | 0              | -0.436077               | -1.762335 | -1.676763 |
| 9                | 1                | 0              | -0.057530               | -2.487972 | -0.953403 |
| 10               | 1                | 0              | -0.632653               | -2.314537 | -2.605606 |
| 11               | 28               | 0              | -1.156043               | 0.442443  | 0.174030  |
| 12               | 6                | 0              | -3.535084               | 0.388647  | -1.539259 |
| 13               | 6                | 0              | -4.788583               | 0.670537  | -2.076374 |
| 14               | 6                | 0              | -3.826460               | 1.984727  | 0.131519  |
| 15               | 6                | 0              | -5.573856               | 1.655665  | -1.474364 |
| 16               | 1                | 0              | -5.143962               | 0.130561  | -2.948128 |
| 17               | 6                | 0              | -5.085960               | 2.324541  | -0.351041 |
| 18               | 1                | 0              | -3.395675               | 2.470141  | 1.001075  |
| 19               | 1                | 0              | -6.554303               | 1.892963  | -1.874941 |
| 20               | 1                | 0              | -5.668312               | 3.092327  | 0.145780  |
| 21               | 6                | 0              | -1.915433               | -2.183637 | 1.153280  |
| 22               | 6                | 0              | -2.063329               | -3.289261 | 1.988912  |
| 23               | 6                | 0              | -1.681715               | -3.181632 | 3.326481  |
| 24               | 1                | 0              | -2.478790               | -4.213764 | 1.600912  |
| 25               | 6                | 0              | -1.028304               | -0.917945 | 2.893156  |
| 26               | 6                | 0              | -1.160941               | -1.972234 | 3.789841  |
| 27               | 1                | 0              | -1.791816               | -4.028208 | 3.996689  |
| 28               | 1                | 0              | -0.628831               | 0.044080  | 3.196275  |
| 29               | 1                | 0              | -0.860453               | -1.846254 | 4.823886  |
| 30               | 7                | 0              | -3.068539               | 1.036300  | -0.449313 |

|    |   |   |           |           |           |
|----|---|---|-----------|-----------|-----------|
| 31 | 7 | 0 | -1.392854 | -1.022919 | 1.601557  |
| 32 | 6 | 0 | 0.609078  | -0.683757 | -1.945403 |
| 33 | 1 | 0 | 1.492154  | -1.142534 | -2.406468 |
| 34 | 1 | 0 | 0.213261  | 0.034702  | -2.670819 |
| 35 | 7 | 0 | 0.988898  | 0.086724  | -0.719455 |
| 36 | 6 | 0 | 1.727597  | 1.291233  | -1.200719 |
| 37 | 1 | 0 | 2.595607  | 0.985297  | -1.797294 |
| 38 | 1 | 0 | 1.055578  | 1.837514  | -1.874254 |
| 39 | 6 | 0 | 1.825188  | -0.739629 | 0.241382  |
| 40 | 1 | 0 | 2.005404  | -0.101876 | 1.110747  |
| 41 | 1 | 0 | 1.180659  | -1.550315 | 0.586215  |
| 42 | 6 | 0 | 3.135147  | -1.297246 | -0.279445 |
| 43 | 6 | 0 | 4.341868  | -0.614362 | -0.062563 |
| 44 | 6 | 0 | 3.180186  | -2.533089 | -0.945888 |
| 45 | 6 | 0 | 5.552478  | -1.131504 | -0.525862 |
| 46 | 1 | 0 | 4.342484  | 0.312192  | 0.505383  |
| 47 | 6 | 0 | 4.387903  | -3.051857 | -1.413493 |
| 48 | 1 | 0 | 2.271222  | -3.115153 | -1.077975 |
| 49 | 6 | 0 | 5.576407  | -2.347756 | -1.210655 |
| 50 | 1 | 0 | 6.477821  | -0.595887 | -0.337751 |
| 51 | 1 | 0 | 4.403527  | -4.011174 | -1.921023 |
| 52 | 1 | 0 | 6.517514  | -2.754302 | -1.566744 |
| 53 | 6 | 0 | 2.229925  | 2.283301  | -0.171129 |
| 54 | 6 | 0 | 3.478855  | 2.890645  | -0.289508 |
| 55 | 6 | 0 | 3.858646  | 3.887803  | 0.612187  |
| 56 | 1 | 0 | 4.146541  | 2.584007  | -1.086618 |
| 57 | 6 | 0 | 1.760608  | 3.636806  | 1.725929  |
| 58 | 6 | 0 | 2.990445  | 4.267757  | 1.639562  |
| 59 | 1 | 0 | 4.829221  | 4.363918  | 0.513980  |
| 60 | 1 | 0 | 1.020440  | 3.865129  | 2.484925  |
| 61 | 1 | 0 | 3.258428  | 5.035514  | 2.355951  |
| 62 | 7 | 0 | 1.420254  | 2.685512  | 0.833332  |
| 63 | 1 | 0 | 0.446239  | 2.233796  | 0.922090  |
| 64 | 1 | 0 | -0.802804 | 1.715242  | 1.082819  |

-----  
**3<sub>B</sub>** (triplet) E(B3LYP/ SDD-6-31G(d,p))= -1491.83468660 hartree

| Center<br>Number | Atomic<br>Number | Atomic<br>Type | Coordinates (Angstroms) |           |           |
|------------------|------------------|----------------|-------------------------|-----------|-----------|
|                  |                  |                | X                       | Y         | Z         |
| 1                | 7                | 0              | -1.510931               | -1.257133 | -0.524710 |
| 2                | 6                | 0              | -2.498671               | -1.262712 | -1.639690 |
| 3                | 1                | 0              | -2.020835               | -0.789174 | -2.505289 |

|    |    |   |           |           |           |
|----|----|---|-----------|-----------|-----------|
| 4  | 1  | 0 | -2.716978 | -2.298033 | -1.935411 |
| 5  | 6  | 0 | -2.081549 | -1.863857 | 0.706960  |
| 6  | 1  | 0 | -3.087021 | -1.455414 | 0.853569  |
| 7  | 1  | 0 | -2.193939 | -2.951459 | 0.598263  |
| 8  | 6  | 0 | -0.296030 | -2.020260 | -0.973947 |
| 9  | 1  | 0 | 0.164239  | -2.452888 | -0.083642 |
| 10 | 1  | 0 | -0.588306 | -2.860331 | -1.617562 |
| 11 | 28 | 0 | -0.590402 | 0.681225  | 0.183461  |
| 12 | 6  | 0 | -3.837172 | -0.582816 | -1.419314 |
| 13 | 6  | 0 | -5.008018 | -1.108162 | -1.961464 |
| 14 | 6  | 0 | -5.054583 | 1.287136  | -0.608559 |
| 15 | 6  | 0 | -6.211131 | -0.408720 | -1.830928 |
| 16 | 1  | 0 | -4.977713 | -2.055908 | -2.487879 |
| 17 | 6  | 0 | -6.238993 | 0.808380  | -1.145728 |
| 18 | 1  | 0 | -4.979913 | 2.213746  | -0.049689 |
| 19 | 1  | 0 | -7.121843 | -0.816546 | -2.258203 |
| 20 | 1  | 0 | -7.156902 | 1.371646  | -1.024132 |
| 21 | 6  | 0 | -1.265786 | -1.543917 | 1.944939  |
| 22 | 6  | 0 | -1.296298 | -2.375964 | 3.063466  |
| 23 | 6  | 0 | -0.611284 | -1.992038 | 4.216231  |
| 24 | 1  | 0 | -1.853126 | -3.307075 | 3.033501  |
| 25 | 6  | 0 | 0.095244  | -0.020784 | 3.055797  |
| 26 | 6  | 0 | 0.093857  | -0.788216 | 4.215084  |
| 27 | 1  | 0 | -0.626877 | -2.623437 | 5.098810  |
| 28 | 1  | 0 | 0.640325  | 0.915766  | 3.000613  |
| 29 | 1  | 0 | 0.638867  | -0.450531 | 5.089358  |
| 30 | 7  | 0 | -3.907942 | 0.596750  | -0.762668 |
| 31 | 7  | 0 | -0.568257 | -0.388340 | 1.943015  |
| 32 | 6  | 0 | 0.714421  | -1.131490 | -1.697698 |
| 33 | 1  | 0 | 1.537234  | -1.746006 | -2.080665 |
| 34 | 1  | 0 | 0.248205  | -0.652764 | -2.564841 |
| 35 | 7  | 0 | 1.203090  | -0.065444 | -0.787788 |
| 36 | 6  | 0 | 1.703222  | 1.132231  | -1.512572 |
| 37 | 1  | 0 | 2.714747  | 0.979745  | -1.903190 |
| 38 | 1  | 0 | 1.050440  | 1.304504  | -2.377296 |
| 39 | 6  | 0 | 2.244098  | -0.569862 | 0.198242  |
| 40 | 1  | 0 | 2.438572  | 0.262696  | 0.879187  |
| 41 | 1  | 0 | 1.765431  | -1.353373 | 0.788386  |
| 42 | 6  | 0 | 3.540054  | -1.076999 | -0.393820 |
| 43 | 6  | 0 | 4.632106  | -0.212834 | -0.573390 |
| 44 | 6  | 0 | 3.691296  | -2.429882 | -0.738423 |
| 45 | 6  | 0 | 5.830607  | -0.680311 | -1.113743 |
| 46 | 1  | 0 | 4.556298  | 0.826155  | -0.260529 |
| 47 | 6  | 0 | 4.888529  | -2.899607 | -1.279571 |

|    |   |   |           |           |           |
|----|---|---|-----------|-----------|-----------|
| 48 | 1 | 0 | 2.880366  | -3.131915 | -0.555356 |
| 49 | 6 | 0 | 5.957746  | -2.023121 | -1.474725 |
| 50 | 1 | 0 | 6.668601  | -0.001836 | -1.238845 |
| 51 | 1 | 0 | 4.991998  | -3.949663 | -1.534216 |
| 52 | 1 | 0 | 6.891853  | -2.388811 | -1.888945 |
| 53 | 6 | 0 | 1.643789  | 2.353978  | -0.615484 |
| 54 | 6 | 0 | 2.528516  | 3.423209  | -0.737253 |
| 55 | 6 | 0 | 2.353765  | 4.541875  | 0.079207  |
| 56 | 1 | 0 | 3.335584  | 3.381412  | -1.461436 |
| 57 | 6 | 0 | 0.455128  | 3.456561  | 1.057080  |
| 58 | 6 | 0 | 1.298373  | 4.560527  | 0.992508  |
| 59 | 1 | 0 | 3.031032  | 5.386547  | 0.002218  |
| 60 | 1 | 0 | -0.390506 | 3.424372  | 1.736948  |
| 61 | 1 | 0 | 1.127700  | 5.412603  | 1.640841  |
| 62 | 7 | 0 | 0.629481  | 2.373859  | 0.276705  |
| 63 | 1 | 0 | -3.007887 | 0.996597  | -0.296426 |
| 64 | 1 | 0 | -1.973887 | 1.483180  | 0.373830  |

-----  
**3<sub>B</sub>** (singlet) E(B3LYP/ SDD-6-31G(d,p))= -1491.81984928 hartree  
 -----

| Center<br>Number | Atomic<br>Number | Atomic<br>Type | Coordinates (Angstroms) |           |           |
|------------------|------------------|----------------|-------------------------|-----------|-----------|
|                  |                  |                | X                       | Y         | Z         |
| 1                | 7                | 0              | -1.372358               | -0.982230 | -0.883467 |
| 2                | 6                | 0              | -2.311754               | -0.498103 | -1.943625 |
| 3                | 1                | 0              | -1.786175               | 0.258370  | -2.534902 |
| 4                | 1                | 0              | -2.539490               | -1.328662 | -2.624435 |
| 5                | 6                | 0              | -2.034919               | -2.058495 | -0.081839 |
| 6                | 1                | 0              | -3.004874               | -1.674961 | 0.250577  |
| 7                | 1                | 0              | -2.235103               | -2.927416 | -0.723580 |
| 8                | 6                | 0              | -0.162425               | -1.553817 | -1.592041 |
| 9                | 1                | 0              | 0.304675                | -2.256678 | -0.901473 |
| 10               | 1                | 0              | -0.473901               | -2.122872 | -2.477147 |
| 11               | 28               | 0              | -0.526857               | 0.472681  | 0.309990  |
| 12               | 6                | 0              | -3.645111               | 0.092263  | -1.526877 |
| 13               | 6                | 0              | -4.793633               | -0.102904 | -2.289968 |
| 14               | 6                | 0              | -4.860287               | 1.531523  | -0.072089 |
| 15               | 6                | 0              | -5.981064               | 0.544671  | -1.938306 |
| 16               | 1                | 0              | -4.757004               | -0.753679 | -3.156791 |
| 17               | 6                | 0              | -6.018599               | 1.375687  | -0.814638 |
| 18               | 1                | 0              | -4.797401               | 2.140179  | 0.822819  |
| 19               | 1                | 0              | -6.874628               | 0.395229  | -2.536305 |
| 20               | 1                | 0              | -6.926782               | 1.885532  | -0.514890 |
| 21               | 6                | 0              | -1.241197               | -2.478886 | 1.141094  |

|    |   |   |           |           |           |
|----|---|---|-----------|-----------|-----------|
| 22 | 6 | 0 | -1.449110 | -3.732907 | 1.719316  |
| 23 | 6 | 0 | -0.772991 | -4.045630 | 2.898411  |
| 24 | 1 | 0 | -2.127192 | -4.447396 | 1.262380  |
| 25 | 6 | 0 | 0.254060  | -1.884891 | 2.790615  |
| 26 | 6 | 0 | 0.092826  | -3.101085 | 3.450160  |
| 27 | 1 | 0 | -0.917525 | -5.010113 | 3.374623  |
| 28 | 1 | 0 | 0.931056  | -1.128548 | 3.178797  |
| 29 | 1 | 0 | 0.638757  | -3.302630 | 4.365251  |
| 30 | 7 | 0 | -3.727255 | 0.904247  | -0.449903 |
| 31 | 7 | 0 | -0.397251 | -1.573244 | 1.657779  |
| 32 | 6 | 0 | 0.822198  | -0.454853 | -1.967328 |
| 33 | 1 | 0 | 1.701417  | -0.882945 | -2.460249 |
| 34 | 1 | 0 | 0.374875  | 0.249147  | -2.674419 |
| 35 | 7 | 0 | 1.192696  | 0.292670  | -0.734581 |
| 36 | 6 | 0 | 1.569051  | 1.713292  | -0.997511 |
| 37 | 1 | 0 | 2.603586  | 1.804348  | -1.342139 |
| 38 | 1 | 0 | 0.920839  | 2.095950  | -1.793868 |
| 39 | 6 | 0 | 2.281607  | -0.416959 | 0.068172  |
| 40 | 1 | 0 | 2.375233  | 0.144826  | 1.000343  |
| 41 | 1 | 0 | 1.879616  | -1.395620 | 0.330570  |
| 42 | 6 | 0 | 3.626154  | -0.551117 | -0.608698 |
| 43 | 6 | 0 | 4.616320  | 0.429885  | -0.436777 |
| 44 | 6 | 0 | 3.929392  | -1.681635 | -1.384737 |
| 45 | 6 | 0 | 5.861821  | 0.302306  | -1.052423 |
| 46 | 1 | 0 | 4.424993  | 1.284835  | 0.207999  |
| 47 | 6 | 0 | 5.173891  | -1.810775 | -2.002447 |
| 48 | 1 | 0 | 3.201929  | -2.484684 | -1.483047 |
| 49 | 6 | 0 | 6.139261  | -0.814710 | -1.843067 |
| 50 | 1 | 0 | 6.619740  | 1.064826  | -0.903028 |
| 51 | 1 | 0 | 5.395353  | -2.694008 | -2.593180 |
| 52 | 1 | 0 | 7.110181  | -0.917852 | -2.316911 |
| 53 | 6 | 0 | 1.321332  | 2.505562  | 0.261512  |
| 54 | 6 | 0 | 2.051096  | 3.628993  | 0.634655  |
| 55 | 6 | 0 | 1.712024  | 4.299337  | 1.811335  |
| 56 | 1 | 0 | 2.872210  | 3.970918  | 0.013441  |
| 57 | 6 | 0 | -0.033697 | 2.689142  | 2.155762  |
| 58 | 6 | 0 | 0.656344  | 3.817389  | 2.585154  |
| 59 | 1 | 0 | 2.267816  | 5.178407  | 2.121254  |
| 60 | 1 | 0 | -0.860440 | 2.276111  | 2.720092  |
| 61 | 1 | 0 | 0.366500  | 4.303300  | 3.509959  |
| 62 | 7 | 0 | 0.287693  | 2.046816  | 1.013638  |
| 63 | 1 | 0 | -2.855427 | 0.991106  | 0.147530  |
| 64 | 1 | 0 | -1.781044 | 0.772399  | 1.043866  |

3c (triplet) E(B3LYP/ SDD-6-31G(d,p))= -1491.83582128 hartree

| Center<br>Number | Atomic<br>Number | Atomic<br>Type | Coordinates (Angstroms) |           |           |
|------------------|------------------|----------------|-------------------------|-----------|-----------|
|                  |                  |                | X                       | Y         | Z         |
| 1                | 7                | 0              | 1.324376                | 1.129202  | -1.117285 |
| 2                | 6                | 0              | 2.204445                | 0.419707  | -2.091757 |
| 3                | 1                | 0              | 1.575510                | -0.229886 | -2.708744 |
| 4                | 1                | 0              | 2.690222                | 1.127231  | -2.777149 |
| 5                | 6                | 0              | 2.097295                | 2.285754  | -0.584007 |
| 6                | 1                | 0              | 3.040791                | 1.890163  | -0.191178 |
| 7                | 1                | 0              | 2.355697                | 2.970114  | -1.403622 |
| 8                | 6                | 0              | 0.037230                | 1.559364  | -1.736182 |
| 9                | 1                | 0              | -0.414307               | 2.297464  | -1.068592 |
| 10               | 1                | 0              | 0.208748                | 2.062429  | -2.698501 |
| 11               | 28               | 0              | 0.818475                | -0.609972 | 0.215732  |
| 12               | 6                | 0              | 3.238835                | -0.431721 | -1.381648 |
| 13               | 6                | 0              | 4.536293                | -0.585770 | -1.862927 |
| 14               | 6                | 0              | 3.658042                | -1.881865 | 0.383964  |
| 15               | 6                | 0              | 5.412973                | -1.435199 | -1.184545 |
| 16               | 1                | 0              | 4.854799                | -0.054754 | -2.754114 |
| 17               | 6                | 0              | 4.966569                | -2.093859 | -0.039635 |
| 18               | 1                | 0              | 3.272775                | -2.367629 | 1.273384  |
| 19               | 1                | 0              | 6.428195                | -1.574056 | -1.542241 |
| 20               | 1                | 0              | 5.616059                | -2.757322 | 0.520237  |
| 21               | 6                | 0              | 1.448783                | 3.113855  | 0.505451  |
| 22               | 6                | 0              | 1.408058                | 4.504612  | 0.458351  |
| 23               | 6                | 0              | 0.905037                | 5.223682  | 1.547626  |
| 24               | 1                | 0              | 1.777654                | 5.022608  | -0.419781 |
| 25               | 6                | 0              | 0.482893                | 3.158553  | 2.674892  |
| 26               | 6                | 0              | 0.437010                | 4.544643  | 2.674734  |
| 27               | 1                | 0              | 0.879743                | 6.308370  | 1.513579  |
| 28               | 1                | 0              | 0.136182                | 2.546869  | 3.500824  |
| 29               | 1                | 0              | 0.043367                | 5.074021  | 3.534666  |
| 30               | 7                | 0              | 2.806668                | -1.073071 | -0.272426 |
| 31               | 7                | 0              | 0.981259                | 2.495681  | 1.614314  |
| 32               | 6                | 0              | -0.927174               | 0.387663  | -1.942734 |
| 33               | 1                | 0              | -1.876863               | 0.769348  | -2.334704 |
| 34               | 1                | 0              | -0.533618               | -0.292471 | -2.702985 |
| 35               | 7                | 0              | -1.127340               | -0.394892 | -0.692407 |
| 36               | 6                | 0              | -1.541878               | -1.796817 | -0.981601 |
| 37               | 1                | 0              | -2.610912               | -1.862085 | -1.208489 |
| 38               | 1                | 0              | -1.005600               | -2.129696 | -1.878108 |

|    |   |   |           |           |           |
|----|---|---|-----------|-----------|-----------|
| 39 | 6 | 0 | -2.082686 | 0.278202  | 0.277850  |
| 40 | 1 | 0 | -2.036362 | -0.309692 | 1.197803  |
| 41 | 1 | 0 | -1.649662 | 1.255632  | 0.506014  |
| 42 | 6 | 0 | -3.514446 | 0.432806  | -0.183857 |
| 43 | 6 | 0 | -4.470254 | -0.549490 | 0.121060  |
| 44 | 6 | 0 | -3.925524 | 1.570658  | -0.896564 |
| 45 | 6 | 0 | -5.792859 | -0.413750 | -0.302398 |
| 46 | 1 | 0 | -4.184790 | -1.413321 | 0.717160  |
| 47 | 6 | 0 | -5.247113 | 1.708110  | -1.322529 |
| 48 | 1 | 0 | -3.217162 | 2.371702  | -1.098344 |
| 49 | 6 | 0 | -6.181180 | 0.711871  | -1.031728 |
| 50 | 1 | 0 | -6.522092 | -1.177897 | -0.052370 |
| 51 | 1 | 0 | -5.550716 | 2.595903  | -1.868317 |
| 52 | 1 | 0 | -7.210796 | 0.820425  | -1.357236 |
| 53 | 6 | 0 | -1.176871 | -2.716439 | 0.165249  |
| 54 | 6 | 0 | -1.941677 | -3.831504 | 0.502067  |
| 55 | 6 | 0 | -1.515194 | -4.657068 | 1.542845  |
| 56 | 1 | 0 | -2.854499 | -4.048232 | -0.043194 |
| 57 | 6 | 0 | 0.359637  | -3.197876 | 1.841824  |
| 58 | 6 | 0 | -0.345213 | -4.331945 | 2.229832  |
| 59 | 1 | 0 | -2.093300 | -5.532719 | 1.820324  |
| 60 | 1 | 0 | 1.259411  | -2.890513 | 2.364414  |
| 61 | 1 | 0 | 0.012816  | -4.937322 | 3.054907  |
| 62 | 7 | 0 | -0.035835 | -2.413965 | 0.822039  |
| 63 | 1 | 0 | 0.974204  | 1.409920  | 1.631416  |
| 64 | 1 | 0 | 0.887116  | 0.076853  | 1.650995  |

-----  
**3<sub>c</sub>** (singlet) E(B3LYP/ SDD-6-31G(d,p))= -1491.81270919 hartree

| Center<br>Number | Atomic<br>Number | Atomic<br>Type | Coordinates (Angstroms) |           |           |
|------------------|------------------|----------------|-------------------------|-----------|-----------|
|                  |                  |                | X                       | Y         | Z         |
| 1                | 7                | 0              | 1.223295                | 1.077647  | -1.168827 |
| 2                | 6                | 0              | 2.095178                | 0.361766  | -2.198975 |
| 3                | 1                | 0              | 1.423158                | -0.176576 | -2.866229 |
| 4                | 1                | 0              | 2.608669                | 1.121703  | -2.798287 |
| 5                | 6                | 0              | 2.004343                | 2.278746  | -0.728719 |
| 6                | 1                | 0              | 2.999941                | 1.917846  | -0.451671 |
| 7                | 1                | 0              | 2.126166                | 2.961875  | -1.577336 |
| 8                | 6                | 0              | -0.060103               | 1.487058  | -1.847628 |
| 9                | 1                | 0              | -0.535743               | 2.252662  | -1.229133 |
| 10               | 1                | 0              | 0.151783                | 1.938720  | -2.825156 |
| 11               | 28               | 0              | 0.660999                | -0.235029 | 0.240864  |



|    |   |   |           |           |           |
|----|---|---|-----------|-----------|-----------|
| 12 | 6 | 0 | 3.066506  | -0.638329 | -1.623738 |
| 13 | 6 | 0 | 4.448172  | -0.474543 | -1.710411 |
| 14 | 6 | 0 | 3.286479  | -2.691067 | -0.613008 |
| 15 | 6 | 0 | 5.273403  | -1.490037 | -1.215551 |
| 16 | 1 | 0 | 4.875592  | 0.410125  | -2.172864 |
| 17 | 6 | 0 | 4.682659  | -2.619929 | -0.657992 |
| 18 | 1 | 0 | 2.792573  | -3.562142 | -0.189785 |
| 19 | 1 | 0 | 6.353269  | -1.399618 | -1.275831 |
| 20 | 1 | 0 | 5.282912  | -3.437379 | -0.273354 |
| 21 | 6 | 0 | 1.449147  | 3.079664  | 0.428939  |
| 22 | 6 | 0 | 1.175032  | 4.441047  | 0.360279  |
| 23 | 6 | 0 | 0.773429  | 5.129062  | 1.511284  |
| 24 | 1 | 0 | 1.289168  | 4.963629  | -0.583167 |
| 25 | 6 | 0 | 0.921144  | 3.089271  | 2.753429  |
| 26 | 6 | 0 | 0.645758  | 4.448037  | 2.724420  |
| 27 | 1 | 0 | 0.564996  | 6.193181  | 1.459200  |
| 28 | 1 | 0 | 0.848127  | 2.481164  | 3.647873  |
| 29 | 1 | 0 | 0.341672  | 4.956585  | 3.631995  |
| 30 | 7 | 0 | 2.488429  | -1.728050 | -1.086062 |
| 31 | 7 | 0 | 1.309901  | 2.460892  | 1.626625  |
| 32 | 6 | 0 | -0.980623 | 0.274674  | -1.994877 |
| 33 | 1 | 0 | -1.950043 | 0.577479  | -2.402970 |
| 34 | 1 | 0 | -0.558744 | -0.456177 | -2.687516 |
| 35 | 7 | 0 | -1.122395 | -0.374234 | -0.663486 |
| 36 | 6 | 0 | -1.348638 | -1.846562 | -0.709483 |
| 37 | 1 | 0 | -2.386873 | -2.098468 | -0.946719 |
| 38 | 1 | 0 | -0.709056 | -2.259792 | -1.496939 |
| 39 | 6 | 0 | -2.174375 | 0.322821  | 0.196729  |
| 40 | 1 | 0 | -2.093876 | -0.117041 | 1.192692  |
| 41 | 1 | 0 | -1.861216 | 1.366934  | 0.281273  |
| 42 | 6 | 0 | -3.599519 | 0.242682  | -0.302260 |
| 43 | 6 | 0 | -4.437060 | -0.809120 | 0.103056  |
| 44 | 6 | 0 | -4.125910 | 1.234786  | -1.144908 |
| 45 | 6 | 0 | -5.754457 | -0.885650 | -0.349491 |
| 46 | 1 | 0 | -4.066986 | -1.558946 | 0.798544  |
| 47 | 6 | 0 | -5.442984 | 1.159523  | -1.599388 |
| 48 | 1 | 0 | -3.515319 | 2.090044  | -1.427291 |
| 49 | 6 | 0 | -6.256806 | 0.094755  | -1.207683 |
| 50 | 1 | 0 | -6.392108 | -1.700772 | -0.022249 |
| 51 | 1 | 0 | -5.837427 | 1.936930  | -2.245987 |
| 52 | 1 | 0 | -7.283245 | 0.038601  | -1.555607 |
| 53 | 6 | 0 | -0.919762 | -2.424815 | 0.620227  |
| 54 | 6 | 0 | -1.431066 | -3.606430 | 1.146798  |
| 55 | 6 | 0 | -0.929399 | -4.084150 | 2.358517  |

|    |   |   |           |           |          |
|----|---|---|-----------|-----------|----------|
| 56 | 1 | 0 | -2.206989 | -4.144449 | 0.612329 |
| 57 | 6 | 0 | 0.533126  | -2.184485 | 2.435725 |
| 58 | 6 | 0 | 0.067597  | -3.360365 | 3.012728 |
| 59 | 1 | 0 | -1.313544 | -5.004979 | 2.785572 |
| 60 | 1 | 0 | 1.312751  | -1.592323 | 2.897405 |
| 61 | 1 | 0 | 0.483198  | -3.696726 | 3.955859 |
| 62 | 7 | 0 | 0.049928  | -1.722661 | 1.264067 |
| 63 | 1 | 0 | 1.483364  | 1.423019  | 1.620338 |
| 64 | 1 | 0 | 1.854122  | -0.009934 | 1.106508 |

-----

**3<sub>dp-A</sub>** (triplet) E(B3LYP/ SDD-6-31G(d,p))= -1491.53246982 hartree

-----

| Center<br>Number | Atomic<br>Number | Atomic<br>Type | Coordinates (Angstroms) |           |           |
|------------------|------------------|----------------|-------------------------|-----------|-----------|
|                  |                  |                | X                       | Y         | Z         |
| 1                | 7                | 0              | 0.876363                | -0.774450 | 1.492747  |
| 2                | 6                | 0              | 1.984682                | 0.017700  | 2.050161  |
| 3                | 1                | 0              | 1.638204                | 1.050693  | 2.164652  |
| 4                | 1                | 0              | 2.292494                | -0.333534 | 3.047428  |
| 5                | 6                | 0              | 1.203344                | -2.215914 | 1.465899  |
| 6                | 1                | 0              | 2.292508                | -2.320730 | 1.423483  |
| 7                | 1                | 0              | 0.879659                | -2.720490 | 2.387057  |
| 8                | 6                | 0              | -0.444216               | -0.527093 | 2.117209  |
| 9                | 1                | 0              | -1.033146               | -1.439877 | 1.994486  |
| 10               | 1                | 0              | -0.350919               | -0.360543 | 3.200693  |
| 11               | 28               | 0              | 0.767601                | -0.015247 | -0.674064 |
| 12               | 6                | 0              | 3.174208                | -0.005191 | 1.100596  |
| 13               | 6                | 0              | 4.491211                | 0.069664  | 1.554583  |
| 14               | 6                | 0              | 3.880588                | -0.094192 | -1.110534 |
| 15               | 6                | 0              | 5.528819                | 0.068030  | 0.620945  |
| 16               | 1                | 0              | 4.698702                | 0.124257  | 2.618718  |
| 17               | 6                | 0              | 5.220963                | -0.018254 | -0.736574 |
| 18               | 1                | 0              | 3.574874                | -0.155342 | -2.150769 |
| 19               | 1                | 0              | 6.561511                | 0.125103  | 0.950818  |
| 20               | 1                | 0              | 5.998155                | -0.029493 | -1.492746 |
| 21               | 6                | 0              | 0.632404                | -2.910662 | 0.245792  |
| 22               | 6                | 0              | 0.342077                | -4.275624 | 0.238634  |
| 23               | 6                | 0              | -0.078589               | -4.868239 | -0.951856 |
| 24               | 1                | 0              | 0.449920                | -4.861554 | 1.146292  |
| 25               | 6                | 0              | 0.094051                | -2.720822 | -2.000808 |
| 26               | 6                | 0              | -0.197759               | -4.079151 | -2.096023 |
| 27               | 1                | 0              | -0.308952               | -5.928637 | -0.984426 |
| 28               | 1                | 0              | 0.013942                | -2.045687 | -2.847539 |

|    |   |   |           |           |           |
|----|---|---|-----------|-----------|-----------|
| 29 | 1 | 0 | -0.516399 | -4.501530 | -3.042656 |
| 30 | 7 | 0 | 2.882869  | -0.085485 | -0.213698 |
| 31 | 7 | 0 | 0.494932  | -2.149878 | -0.853800 |
| 32 | 6 | 0 | -1.191578 | 0.650427  | 1.486954  |
| 33 | 1 | 0 | -2.176782 | 0.746289  | 1.962919  |
| 34 | 1 | 0 | -0.650679 | 1.576764  | 1.692217  |
| 35 | 7 | 0 | -1.310534 | 0.515336  | 0.013510  |
| 36 | 6 | 0 | -1.557167 | 1.823705  | -0.624118 |
| 37 | 1 | 0 | -1.715298 | 1.631753  | -1.692242 |
| 38 | 1 | 0 | -2.464155 | 2.307078  | -0.237174 |
| 39 | 6 | 0 | -2.340460 | -0.487638 | -0.413568 |
| 40 | 1 | 0 | -2.223123 | -0.589249 | -1.496126 |
| 41 | 1 | 0 | -2.057210 | -1.446867 | 0.025118  |
| 42 | 6 | 0 | -3.783922 | -0.171975 | -0.067473 |
| 43 | 6 | 0 | -4.593521 | 0.550580  | -0.956736 |
| 44 | 6 | 0 | -4.348976 | -0.615837 | 1.137742  |
| 45 | 6 | 0 | -5.920928 | 0.842132  | -0.640930 |
| 46 | 1 | 0 | -4.188271 | 0.871721  | -1.913166 |
| 47 | 6 | 0 | -5.675801 | -0.324884 | 1.458693  |
| 48 | 1 | 0 | -3.753779 | -1.214492 | 1.823906  |
| 49 | 6 | 0 | -6.463410 | 0.409656  | 0.570820  |
| 50 | 1 | 0 | -6.534092 | 1.396616  | -1.344979 |
| 51 | 1 | 0 | -6.096689 | -0.680818 | 2.394278  |
| 52 | 1 | 0 | -7.497599 | 0.631850  | 0.815259  |
| 53 | 6 | 0 | -0.378518 | 2.760843  | -0.499503 |
| 54 | 6 | 0 | -0.550695 | 4.143755  | -0.591459 |
| 55 | 6 | 0 | 0.568660  | 4.971409  | -0.566096 |
| 56 | 1 | 0 | -1.549465 | 4.557790  | -0.687618 |
| 57 | 6 | 0 | 1.912751  | 3.004409  | -0.335156 |
| 58 | 6 | 0 | 1.829642  | 4.388938  | -0.437883 |
| 59 | 1 | 0 | 0.459478  | 6.048641  | -0.642890 |
| 60 | 1 | 0 | 2.874892  | 2.513749  | -0.235413 |
| 61 | 1 | 0 | 2.731549  | 4.990689  | -0.413367 |
| 62 | 7 | 0 | 0.836751  | 2.199242  | -0.362920 |
| 63 | 1 | 0 | 0.668031  | 0.234794  | -2.239175 |

-----

**3<sub>dp-A</sub>** (singlet) E(B3LYP/ SDD-6-31G(d,p))= -1491.51565940 hartree

| Center<br>Number | Atomic<br>Number | Atomic<br>Type | Coordinates (Angstroms) |           |          |
|------------------|------------------|----------------|-------------------------|-----------|----------|
|                  |                  |                | X                       | Y         | Z        |
| 1                | 7                | 0              | -0.974732               | 0.538995  | 1.045152 |
| 2                | 6                | 0              | -1.805161               | -0.483732 | 1.752143 |

|    |    |   |           |           |           |
|----|----|---|-----------|-----------|-----------|
| 3  | 1  | 0 | -1.370861 | -1.461755 | 1.524214  |
| 4  | 1  | 0 | -1.712942 | -0.336593 | 2.837455  |
| 5  | 6  | 0 | -1.625254 | 1.876330  | 1.071624  |
| 6  | 1  | 0 | -2.693450 | 1.739985  | 0.890951  |
| 7  | 1  | 0 | -1.515235 | 2.360858  | 2.052015  |
| 8  | 6  | 0 | 0.357007  | 0.642028  | 1.723665  |
| 9  | 1  | 0 | 0.787961  | 1.606614  | 1.443224  |
| 10 | 1  | 0 | 0.212112  | 0.661332  | 2.814215  |
| 11 | 28 | 0 | -0.585859 | 0.207980  | -1.043002 |
| 12 | 6  | 0 | -3.284677 | -0.508742 | 1.407023  |
| 13 | 6  | 0 | -4.226538 | -0.667386 | 2.429894  |
| 14 | 6  | 0 | -4.942520 | -0.459197 | -0.189634 |
| 15 | 6  | 0 | -5.579830 | -0.738465 | 2.099091  |
| 16 | 1  | 0 | -3.906666 | -0.734200 | 3.465324  |
| 17 | 6  | 0 | -5.950143 | -0.628917 | 0.760520  |
| 18 | 1  | 0 | -5.189267 | -0.361473 | -1.244640 |
| 19 | 1  | 0 | -6.328694 | -0.866576 | 2.874605  |
| 20 | 1  | 0 | -6.990402 | -0.668400 | 0.455516  |
| 21 | 6  | 0 | -1.087078 | 2.754481  | -0.027601 |
| 22 | 6  | 0 | -1.079006 | 4.144936  | 0.060658  |
| 23 | 6  | 0 | -0.653918 | 4.895420  | -1.033879 |
| 24 | 1  | 0 | -1.407959 | 4.627108  | 0.975396  |
| 25 | 6  | 0 | -0.264479 | 2.837941  | -2.203660 |
| 26 | 6  | 0 | -0.243157 | 4.227321  | -2.186808 |
| 27 | 1  | 0 | -0.643688 | 5.979658  | -0.986913 |
| 28 | 1  | 0 | 0.045539  | 2.272529  | -3.072177 |
| 29 | 1  | 0 | 0.092675  | 4.767595  | -3.064691 |
| 30 | 7  | 0 | -3.638999 | -0.408637 | 0.115735  |
| 31 | 7  | 0 | -0.675062 | 2.106835  | -1.143856 |
| 32 | 6  | 0 | 1.341353  | -0.465211 | 1.345887  |
| 33 | 1  | 0 | 2.199604  | -0.421875 | 2.032505  |
| 34 | 1  | 0 | 0.881657  | -1.445872 | 1.499848  |
| 35 | 7  | 0 | 1.746319  | -0.344968 | -0.058051 |
| 36 | 6  | 0 | 1.936831  | -1.618711 | -0.737797 |
| 37 | 1  | 0 | 2.322678  | -1.397912 | -1.741621 |
| 38 | 1  | 0 | 2.682373  | -2.270314 | -0.254723 |
| 39 | 6  | 0 | 2.841897  | 0.623369  | -0.303578 |
| 40 | 1  | 0 | 2.909092  | 0.749107  | -1.389532 |
| 41 | 1  | 0 | 2.523801  | 1.589436  | 0.102496  |
| 42 | 6  | 0 | 4.203290  | 0.260269  | 0.266084  |
| 43 | 6  | 0 | 5.086471  | -0.562306 | -0.449554 |
| 44 | 6  | 0 | 4.605749  | 0.735992  | 1.522832  |
| 45 | 6  | 0 | 6.325120  | -0.917911 | 0.084678  |
| 46 | 1  | 0 | 4.812760  | -0.911834 | -1.442178 |

|    |   |   |           |           |           |
|----|---|---|-----------|-----------|-----------|
| 47 | 6 | 0 | 5.844189  | 0.382094  | 2.061696  |
| 48 | 1 | 0 | 3.954325  | 1.408797  | 2.076650  |
| 49 | 6 | 0 | 6.704596  | -0.450545 | 1.344879  |
| 50 | 1 | 0 | 6.998998  | -1.549216 | -0.486901 |
| 51 | 1 | 0 | 6.140512  | 0.764822  | 3.033816  |
| 52 | 1 | 0 | 7.670722  | -0.722542 | 1.758838  |
| 53 | 6 | 0 | 0.652872  | -2.402812 | -0.919567 |
| 54 | 6 | 0 | 0.693219  | -3.797561 | -0.987147 |
| 55 | 6 | 0 | -0.466360 | -4.513980 | -1.267757 |
| 56 | 1 | 0 | 1.637905  | -4.307157 | -0.827716 |
| 57 | 6 | 0 | -1.632234 | -2.424686 | -1.364330 |
| 58 | 6 | 0 | -1.653283 | -3.809962 | -1.465108 |
| 59 | 1 | 0 | -0.443487 | -5.597362 | -1.331207 |
| 60 | 1 | 0 | -2.526892 | -1.828709 | -1.486701 |
| 61 | 1 | 0 | -2.584337 | -4.317362 | -1.691614 |
| 62 | 7 | 0 | -0.507830 | -1.728972 | -1.087754 |
| 63 | 1 | 0 | -0.396394 | 0.124762  | -2.476493 |

-----  
**3<sub>dp-B</sub>** (triplet) E(B3LYP/ SDD-6-31G(d,p))= -1491.52817657 hartree

| Center<br>Number | Atomic<br>Number | Atomic<br>Type | Coordinates (Angstroms) |           |           |
|------------------|------------------|----------------|-------------------------|-----------|-----------|
|                  |                  |                | X                       | Y         | Z         |
| 1                | 7                | 0              | 1.439134                | 1.538345  | -1.250574 |
| 2                | 6                | 0              | 2.737154                | 1.139443  | -1.831003 |
| 3                | 1                | 0              | 2.789341                | 1.372347  | -2.904566 |
| 4                | 1                | 0              | 3.513008                | 1.731923  | -1.334358 |
| 5                | 6                | 0              | 1.431854                | 2.955946  | -0.827906 |
| 6                | 1                | 0              | 2.413049                | 3.168560  | -0.390508 |
| 7                | 1                | 0              | 1.289239                | 3.640374  | -1.676727 |
| 8                | 6                | 0              | 0.280137                | 1.218333  | -2.129744 |
| 9                | 1                | 0              | -0.514109               | 1.930950  | -1.894027 |
| 10               | 1                | 0              | 0.542814                | 1.378878  | -3.185390 |
| 11               | 28               | 0              | 1.228881                | 0.419472  | 0.608825  |
| 12               | 6                | 0              | 3.098453                | -0.314316 | -1.592255 |
| 13               | 6                | 0              | 4.046995                | -0.954733 | -2.393022 |
| 14               | 6                | 0              | 2.965748                | -2.148532 | -0.190518 |
| 15               | 6                | 0              | 4.465200                | -2.239363 | -2.053539 |
| 16               | 1                | 0              | 4.456390                | -0.446289 | -3.260512 |
| 17               | 6                | 0              | 3.921152                | -2.846839 | -0.921189 |
| 18               | 1                | 0              | 2.513101                | -2.579916 | 0.697080  |
| 19               | 1                | 0              | 5.205421                | -2.754380 | -2.657680 |
| 20               | 1                | 0              | 4.224572                | -3.840664 | -0.610996 |

|    |   |   |           |           |           |
|----|---|---|-----------|-----------|-----------|
| 21 | 6 | 0 | 0.402199  | 3.233325  | 0.250722  |
| 22 | 6 | 0 | -0.138170 | 4.508917  | 0.423931  |
| 23 | 6 | 0 | -0.978854 | 4.748277  | 1.509454  |
| 24 | 1 | 0 | 0.106767  | 5.301185  | -0.276590 |
| 25 | 6 | 0 | -0.699156 | 2.453732  | 2.130717  |
| 26 | 6 | 0 | -1.260181 | 3.700910  | 2.386918  |
| 27 | 1 | 0 | -1.405010 | 5.733873  | 1.667946  |
| 28 | 1 | 0 | -0.896804 | 1.605941  | 2.779990  |
| 29 | 1 | 0 | -1.904913 | 3.841325  | 3.247514  |
| 30 | 7 | 0 | 2.551546  | -0.913499 | -0.519973 |
| 31 | 7 | 0 | 0.109977  | 2.218293  | 1.085906  |
| 32 | 6 | 0 | -0.250774 | -0.211324 | -1.953637 |
| 33 | 1 | 0 | -1.081057 | -0.368415 | -2.655149 |
| 34 | 1 | 0 | 0.526833  | -0.929573 | -2.219256 |
| 35 | 7 | 0 | -0.645570 | -0.459412 | -0.552761 |
| 36 | 6 | 0 | -0.589037 | -1.873109 | -0.143740 |
| 37 | 1 | 0 | -1.486237 | -2.435685 | -0.430590 |
| 38 | 1 | 0 | 0.255340  | -2.339682 | -0.660685 |
| 39 | 6 | 0 | -1.960745 | 0.160836  | -0.186782 |
| 40 | 1 | 0 | -2.057568 | 0.062616  | 0.898052  |
| 41 | 1 | 0 | -1.885699 | 1.229446  | -0.393169 |
| 42 | 6 | 0 | -3.193431 | -0.407482 | -0.865075 |
| 43 | 6 | 0 | -3.925569 | -1.445753 | -0.268975 |
| 44 | 6 | 0 | -3.646695 | 0.108440  | -2.089165 |
| 45 | 6 | 0 | -5.057576 | -1.974682 | -0.890583 |
| 46 | 1 | 0 | -3.619948 | -1.827523 | 0.702488  |
| 47 | 6 | 0 | -4.777554 | -0.418144 | -2.714861 |
| 48 | 1 | 0 | -3.126644 | 0.946531  | -2.547347 |
| 49 | 6 | 0 | -5.481923 | -1.466001 | -2.119373 |
| 50 | 1 | 0 | -5.614272 | -2.774264 | -0.411054 |
| 51 | 1 | 0 | -5.115305 | -0.002493 | -3.659442 |
| 52 | 1 | 0 | -6.364958 | -1.872854 | -2.602365 |
| 53 | 6 | 0 | -0.353390 | -1.995681 | 1.353165  |
| 54 | 6 | 0 | -0.901929 | -3.031200 | 2.110821  |
| 55 | 6 | 0 | -0.589211 | -3.120354 | 3.467880  |
| 56 | 1 | 0 | -1.561457 | -3.754388 | 1.641396  |
| 57 | 6 | 0 | 0.771866  | -1.166186 | 3.211671  |
| 58 | 6 | 0 | 0.263981  | -2.171740 | 4.030938  |
| 59 | 1 | 0 | -1.006896 | -3.917614 | 4.074997  |
| 60 | 1 | 0 | 1.452202  | -0.405280 | 3.582753  |
| 61 | 1 | 0 | 0.534253  | -2.205974 | 5.080572  |
| 62 | 7 | 0 | 0.467022  | -1.078244 | 1.906538  |
| 63 | 1 | 0 | 2.471852  | 0.971148  | 1.437466  |

3<sub>dp-B</sub> (singlet) E(B3LYP/ SDD-6-31G(d,p))= -1491.50072715 hartree

| Center<br>Number | Atomic<br>Number | Atomic<br>Type | Coordinates (Angstroms) |           |           |
|------------------|------------------|----------------|-------------------------|-----------|-----------|
|                  |                  |                | X                       | Y         | Z         |
| 1                | 7                | 0              | 1.674420                | 1.802157  | -1.120438 |
| 2                | 6                | 0              | 2.916081                | 1.262016  | -1.652871 |
| 3                | 1                | 0              | 3.030900                | 1.485038  | -2.725856 |
| 4                | 1                | 0              | 3.753717                | 1.755537  | -1.146959 |
| 5                | 6                | 0              | 1.749804                | 2.989867  | -0.277782 |
| 6                | 1                | 0              | 2.773404                | 3.067897  | 0.104726  |
| 7                | 1                | 0              | 1.550347                | 3.919661  | -0.833524 |
| 8                | 6                | 0              | 0.510552                | 1.707919  | -1.998617 |
| 9                | 1                | 0              | -0.229906               | 2.439214  | -1.662531 |
| 10               | 1                | 0              | 0.763675                | 1.977734  | -3.037529 |
| 11               | 28               | 0              | 1.344111                | 0.216088  | 0.669241  |
| 12               | 6                | 0              | 3.122565                | -0.242160 | -1.456475 |
| 13               | 6                | 0              | 3.992007                | -0.936276 | -2.300804 |
| 14               | 6                | 0              | 2.797163                | -2.159674 | -0.174313 |
| 15               | 6                | 0              | 4.270855                | -2.278549 | -2.056917 |
| 16               | 1                | 0              | 4.449430                | -0.417296 | -3.137497 |
| 17               | 6                | 0              | 3.664586                | -2.901727 | -0.966148 |
| 18               | 1                | 0              | 2.296643                | -2.590517 | 0.684833  |
| 19               | 1                | 0              | 4.949028                | -2.826260 | -2.703607 |
| 20               | 1                | 0              | 3.854909                | -3.942439 | -0.728845 |
| 21               | 6                | 0              | 0.831091                | 2.950651  | 0.941550  |
| 22               | 6                | 0              | 0.304526                | 4.130751  | 1.468167  |
| 23               | 6                | 0              | -0.440673               | 4.092626  | 2.645457  |
| 24               | 1                | 0              | 0.488366                | 5.070943  | 0.957860  |
| 25               | 6                | 0              | -0.111805               | 1.721843  | 2.682036  |
| 26               | 6                | 0              | -0.647987               | 2.862875  | 3.268136  |
| 27               | 1                | 0              | -0.850517               | 5.004985  | 3.066933  |
| 28               | 1                | 0              | -0.249172               | 0.739354  | 3.118550  |
| 29               | 1                | 0              | -1.216774               | 2.780927  | 4.187575  |
| 30               | 7                | 0              | 2.521315                | -0.861574 | -0.414888 |
| 31               | 7                | 0              | 0.604692                | 1.758402  | 1.542803  |
| 32               | 6                | 0              | -0.104551               | 0.301092  | -2.012949 |
| 33               | 1                | 0              | -0.964201               | 0.287748  | -2.695838 |
| 34               | 1                | 0              | 0.627974                | -0.401912 | -2.418147 |
| 35               | 7                | 0              | -0.480036               | -0.181519 | -0.659547 |
| 36               | 6                | 0              | -0.693585               | -1.649944 | -0.706184 |
| 37               | 1                | 0              | -1.560504               | -1.900953 | -1.330718 |
| 38               | 1                | 0              | 0.184523                | -2.087133 | -1.193764 |

|    |   |   |           |           |           |
|----|---|---|-----------|-----------|-----------|
| 39 | 6 | 0 | -1.710047 | 0.515802  | -0.134728 |
| 40 | 1 | 0 | -1.840593 | 0.167416  | 0.891618  |
| 41 | 1 | 0 | -1.475008 | 1.579298  | -0.077035 |
| 42 | 6 | 0 | -3.002002 | 0.330733  | -0.911545 |
| 43 | 6 | 0 | -3.904771 | -0.689124 | -0.573880 |
| 44 | 6 | 0 | -3.347752 | 1.204712  | -1.954151 |
| 45 | 6 | 0 | -5.101694 | -0.848870 | -1.273548 |
| 46 | 1 | 0 | -3.677590 | -1.352905 | 0.256083  |
| 47 | 6 | 0 | -4.542370 | 1.047360  | -2.658115 |
| 48 | 1 | 0 | -2.689017 | 2.032710  | -2.205384 |
| 49 | 6 | 0 | -5.420315 | 0.015331  | -2.322402 |
| 50 | 1 | 0 | -5.790020 | -1.640504 | -0.992711 |
| 51 | 1 | 0 | -4.792651 | 1.736717  | -3.458878 |
| 52 | 1 | 0 | -6.352850 | -0.105376 | -2.865027 |
| 53 | 6 | 0 | -0.847233 | -2.299800 | 0.657475  |
| 54 | 6 | 0 | -1.708554 | -3.387937 | 0.836326  |
| 55 | 6 | 0 | -1.761260 | -4.011401 | 2.082843  |
| 56 | 1 | 0 | -2.322879 | -3.738543 | 0.012623  |
| 57 | 6 | 0 | -0.133661 | -2.432975 | 2.846038  |
| 58 | 6 | 0 | -0.957627 | -3.525676 | 3.113645  |
| 59 | 1 | 0 | -2.420030 | -4.858890 | 2.245881  |
| 60 | 1 | 0 | 0.514766  | -2.023211 | 3.617713  |
| 61 | 1 | 0 | -0.966461 | -3.977935 | 4.099635  |
| 62 | 7 | 0 | -0.073786 | -1.831313 | 1.649369  |
| 63 | 1 | 0 | 2.459097  | 0.348376  | 1.588546  |

-----  
**3<sub>dp-c</sub>** (triplet) E(B3LYP/ SDD-6-31G(d,p))= -1491.52403113 hartree  
 -----

| Center<br>Number | Atomic<br>Number | Atomic<br>Type | Coordinates (Angstroms) |           |           |
|------------------|------------------|----------------|-------------------------|-----------|-----------|
|                  |                  |                | X                       | Y         | Z         |
| 1                | 7                | 0              | 1.158646                | -1.924253 | 0.296735  |
| 2                | 6                | 0              | 1.941718                | -1.815559 | 1.546263  |
| 3                | 1                | 0              | 1.607307                | -2.563843 | 2.277857  |
| 4                | 1                | 0              | 2.987046                | -2.059342 | 1.326096  |
| 5                | 6                | 0              | 1.949859                | -2.535692 | -0.792784 |
| 6                | 1                | 0              | 2.375704                | -3.508410 | -0.506062 |
| 7                | 1                | 0              | 1.270442                | -2.689052 | -1.637763 |
| 8                | 6                | 0              | -0.175352               | -2.534392 | 0.507996  |
| 9                | 1                | 0              | -0.537943               | -2.877923 | -0.462841 |
| 10               | 1                | 0              | -0.111702               | -3.415055 | 1.164232  |
| 11               | 28               | 0              | 0.677737                | 0.021571  | -0.575506 |
| 12               | 6                | 0              | 1.932089                | -0.439777 | 2.189083  |
| 13               | 6                | 0              | 2.459566                | -0.266782 | 3.473668  |



|    |   |   |           |           |           |
|----|---|---|-----------|-----------|-----------|
| 14 | 6 | 0 | 1.535476  | 1.827411  | 1.994136  |
| 15 | 6 | 0 | 2.526348  | 1.013435  | 4.013713  |
| 16 | 1 | 0 | 2.816574  | -1.126181 | 4.033355  |
| 17 | 6 | 0 | 2.061455  | 2.088653  | 3.253788  |
| 18 | 1 | 0 | 1.151868  | 2.628962  | 1.371121  |
| 19 | 1 | 0 | 2.934799  | 1.171386  | 5.006996  |
| 20 | 1 | 0 | 2.099570  | 3.105549  | 3.628622  |
| 21 | 6 | 0 | 3.049726  | -1.594303 | -1.249396 |
| 22 | 6 | 0 | 4.248162  | -2.073084 | -1.779297 |
| 23 | 6 | 0 | 5.192166  | -1.163981 | -2.255436 |
| 24 | 1 | 0 | 4.433526  | -3.141896 | -1.821574 |
| 25 | 6 | 0 | 3.703697  | 0.596021  | -1.611593 |
| 26 | 6 | 0 | 4.915919  | 0.199961  | -2.170272 |
| 27 | 1 | 0 | 6.128084  | -1.514681 | -2.678789 |
| 28 | 1 | 0 | 3.451760  | 1.648596  | -1.516262 |
| 29 | 1 | 0 | 5.623002  | 0.943695  | -2.521026 |
| 30 | 7 | 0 | 1.463002  | 0.590533  | 1.468005  |
| 31 | 7 | 0 | 2.785724  | -0.274188 | -1.165732 |
| 32 | 6 | 0 | -1.167198 | -1.524356 | 1.106732  |
| 33 | 1 | 0 | -2.109344 | -2.034329 | 1.343350  |
| 34 | 1 | 0 | -0.773195 | -1.136149 | 2.050481  |
| 35 | 7 | 0 | -1.370530 | -0.382643 | 0.186515  |
| 36 | 6 | 0 | -1.748196 | 0.880474  | 0.848039  |
| 37 | 1 | 0 | -2.811195 | 0.915940  | 1.116945  |
| 38 | 1 | 0 | -1.176129 | 0.956845  | 1.778110  |
| 39 | 6 | 0 | -2.291472 | -0.707120 | -0.958840 |
| 40 | 1 | 0 | -2.221943 | 0.131290  | -1.654968 |
| 41 | 1 | 0 | -1.854336 | -1.555940 | -1.485279 |
| 42 | 6 | 0 | -3.736440 | -0.984395 | -0.594812 |
| 43 | 6 | 0 | -4.685617 | 0.049585  | -0.580441 |
| 44 | 6 | 0 | -4.169035 | -2.286079 | -0.296268 |
| 45 | 6 | 0 | -6.017085 | -0.201638 | -0.246059 |
| 46 | 1 | 0 | -4.384447 | 1.056209  | -0.860765 |
| 47 | 6 | 0 | -5.499088 | -2.541955 | 0.040158  |
| 48 | 1 | 0 | -3.466057 | -3.113934 | -0.354282 |
| 49 | 6 | 0 | -6.425113 | -1.497942 | 0.073029  |
| 50 | 1 | 0 | -6.737827 | 0.610715  | -0.247608 |
| 51 | 1 | 0 | -5.814679 | -3.556893 | 0.262612  |
| 52 | 1 | 0 | -7.461498 | -1.696237 | 0.328523  |
| 53 | 6 | 0 | -1.398656 | 2.063388  | -0.041064 |
| 54 | 6 | 0 | -2.211775 | 3.194872  | -0.121859 |
| 55 | 6 | 0 | -1.829730 | 4.252158  | -0.947681 |
| 56 | 1 | 0 | -3.132604 | 3.239946  | 0.450924  |
| 57 | 6 | 0 | 0.103195  | 2.977832  | -1.555126 |

|    |   |   |           |           |           |
|----|---|---|-----------|-----------|-----------|
| 58 | 6 | 0 | -0.651340 | 4.140810  | -1.684623 |
| 59 | 1 | 0 | -2.449090 | 5.140283  | -1.025096 |
| 60 | 1 | 0 | 1.016825  | 2.834254  | -2.124240 |
| 61 | 1 | 0 | -0.324422 | 4.929743  | -2.352940 |
| 62 | 7 | 0 | -0.248766 | 1.968473  | -0.743489 |
| 63 | 1 | 0 | 0.297062  | -0.478250 | -2.036114 |

-----

**3<sub>dp-c</sub>** (singlet) E(B3LYP/ SDD-6-31G(d,p))= -1491.50743211 hartree

-----

| Center<br>Number | Atomic<br>Number | Atomic<br>Type | Coordinates (Angstroms) |           |           |
|------------------|------------------|----------------|-------------------------|-----------|-----------|
|                  |                  |                | X                       | Y         | Z         |
| 1                | 7                | 0              | 1.055344                | -1.990882 | 0.358015  |
| 2                | 6                | 0              | 1.769836                | -1.762266 | 1.610462  |
| 3                | 1                | 0              | 1.382772                | -2.408999 | 2.411729  |
| 4                | 1                | 0              | 2.821576                | -2.053368 | 1.487926  |
| 5                | 6                | 0              | 1.865533                | -2.629905 | -0.672467 |
| 6                | 1                | 0              | 2.236447                | -3.628804 | -0.382589 |
| 7                | 1                | 0              | 1.230364                | -2.770700 | -1.555199 |
| 8                | 6                | 0              | -0.263324               | -2.607730 | 0.530533  |
| 9                | 1                | 0              | -0.593605               | -2.969747 | -0.447063 |
| 10               | 1                | 0              | -0.214055               | -3.490839 | 1.192465  |
| 11               | 28               | 0              | 1.173597                | 0.464228  | -0.736017 |
| 12               | 6                | 0              | 1.778124                | -0.327783 | 2.126632  |
| 13               | 6                | 0              | 2.032802                | -0.109202 | 3.486008  |
| 14               | 6                | 0              | 1.723398                | 1.960142  | 1.753142  |
| 15               | 6                | 0              | 2.144338                | 1.187437  | 3.974685  |
| 16               | 1                | 0              | 2.144138                | -0.961565 | 4.149197  |
| 17               | 6                | 0              | 1.992455                | 2.250363  | 3.083930  |
| 18               | 1                | 0              | 1.581076                | 2.757189  | 1.031327  |
| 19               | 1                | 0              | 2.343163                | 1.365941  | 5.026798  |
| 20               | 1                | 0              | 2.072462                | 3.281742  | 3.408797  |
| 21               | 6                | 0              | 3.045673                | -1.775970 | -1.077975 |
| 22               | 6                | 0              | 4.271551                | -2.355054 | -1.414966 |
| 23               | 6                | 0              | 5.331469                | -1.548814 | -1.818471 |
| 24               | 1                | 0              | 4.382519                | -3.432899 | -1.356232 |
| 25               | 6                | 0              | 3.896474                | 0.340761  | -1.511410 |
| 26               | 6                | 0              | 5.139901                | -0.168295 | -1.862891 |
| 27               | 1                | 0              | 6.287539                | -1.986959 | -2.086668 |
| 28               | 1                | 0              | 3.701029                | 1.406450  | -1.543051 |
| 29               | 1                | 0              | 5.932430                | 0.506870  | -2.165294 |
| 30               | 7                | 0              | 1.612884                | 0.703423  | 1.271064  |
| 31               | 7                | 0              | 2.865313                | -0.439458 | -1.125148 |

|    |   |   |           |           |           |
|----|---|---|-----------|-----------|-----------|
| 32 | 6 | 0 | -1.306437 | -1.631834 | 1.085489  |
| 33 | 1 | 0 | -2.223667 | -2.192336 | 1.323290  |
| 34 | 1 | 0 | -0.949414 | -1.228271 | 2.038835  |
| 35 | 7 | 0 | -1.540640 | -0.520566 | 0.169129  |
| 36 | 6 | 0 | -1.765082 | 0.765817  | 0.798899  |
| 37 | 1 | 0 | -2.804909 | 0.925844  | 1.127971  |
| 38 | 1 | 0 | -1.144947 | 0.814524  | 1.700937  |
| 39 | 6 | 0 | -2.444422 | -0.817843 | -0.964730 |
| 40 | 1 | 0 | -2.340222 | 0.000388  | -1.685092 |
| 41 | 1 | 0 | -2.058095 | -1.710868 | -1.465661 |
| 42 | 6 | 0 | -3.911079 | -1.020195 | -0.620769 |
| 43 | 6 | 0 | -4.803376 | 0.062391  | -0.613097 |
| 44 | 6 | 0 | -4.407739 | -2.292661 | -0.299853 |
| 45 | 6 | 0 | -6.144932 | -0.114530 | -0.270718 |
| 46 | 1 | 0 | -4.450192 | 1.048662  | -0.905547 |
| 47 | 6 | 0 | -5.748152 | -2.474686 | 0.044033  |
| 48 | 1 | 0 | -3.746438 | -3.154986 | -0.343929 |
| 49 | 6 | 0 | -6.618985 | -1.383847 | 0.065264  |
| 50 | 1 | 0 | -6.822439 | 0.734400  | -0.278654 |
| 51 | 1 | 0 | -6.114896 | -3.468642 | 0.282745  |
| 52 | 1 | 0 | -7.663359 | -1.524587 | 0.326637  |
| 53 | 6 | 0 | -1.373599 | 1.926649  | -0.096811 |
| 54 | 6 | 0 | -2.204232 | 3.049080  | -0.179762 |
| 55 | 6 | 0 | -1.847284 | 4.132874  | -0.975193 |
| 56 | 1 | 0 | -3.131855 | 3.055233  | 0.383045  |
| 57 | 6 | 0 | 0.118115  | 2.913593  | -1.580674 |
| 58 | 6 | 0 | -0.657632 | 4.059302  | -1.697249 |
| 59 | 1 | 0 | -2.489198 | 5.005567  | -1.043017 |
| 60 | 1 | 0 | 1.035040  | 2.803547  | -2.146496 |
| 61 | 1 | 0 | -0.335453 | 4.862147  | -2.350878 |
| 62 | 7 | 0 | -0.209435 | 1.867879  | -0.785711 |
| 63 | 1 | 0 | 0.906866  | 0.307140  | -2.151513 |

-----

**TS<sub>A</sub>** (triplet)E(B3LYP/ SDD-6-31G(d,p))= -1491.82788406 hartree

-----

| Center<br>Number | Atomic<br>Number | Atomic<br>Type | Coordinates (Angstroms) |           |           |
|------------------|------------------|----------------|-------------------------|-----------|-----------|
|                  |                  |                | X                       | Y         | Z         |
| 1                | 7                | 0              | -1.620128               | -1.245658 | -1.207638 |
| 2                | 6                | 0              | -2.487567               | -0.558987 | -2.197295 |
| 3                | 1                | 0              | -1.846386               | -0.060760 | -2.931872 |
| 4                | 1                | 0              | -3.102698               | -1.277621 | -2.752817 |
| 5                | 6                | 0              | -2.376774               | -2.285967 | -0.459457 |

|    |    |   |           |           |           |
|----|----|---|-----------|-----------|-----------|
| 6  | 1  | 0 | -3.412428 | -1.942855 | -0.357096 |
| 7  | 1  | 0 | -2.404248 | -3.226800 | -1.022517 |
| 8  | 6  | 0 | -0.345918 | -1.775596 | -1.772798 |
| 9  | 1  | 0 | 0.023268  | -2.539147 | -1.083821 |
| 10 | 1  | 0 | -0.518565 | -2.267673 | -2.738344 |
| 11 | 28 | 0 | -1.052458 | 0.180423  | 0.204101  |
| 12 | 6  | 0 | -3.357686 | 0.481287  | -1.514196 |
| 13 | 6  | 0 | -4.570181 | 0.898305  | -2.055529 |
| 14 | 6  | 0 | -3.568309 | 1.993502  | 0.249742  |
| 15 | 6  | 0 | -5.289384 | 1.907775  | -1.413202 |
| 16 | 1  | 0 | -4.944482 | 0.442788  | -2.966667 |
| 17 | 6  | 0 | -4.778839 | 2.466754  | -0.240672 |
| 18 | 1  | 0 | -3.137322 | 2.392879  | 1.161560  |
| 19 | 1  | 0 | -6.236094 | 2.248297  | -1.820503 |
| 20 | 1  | 0 | -5.307901 | 3.250632  | 0.289348  |
| 21 | 6  | 0 | -1.799630 | -2.496194 | 0.923675  |
| 22 | 6  | 0 | -1.950443 | -3.692690 | 1.620483  |
| 23 | 6  | 0 | -1.460842 | -3.784762 | 2.923732  |
| 24 | 1  | 0 | -2.447384 | -4.535695 | 1.151394  |
| 25 | 6  | 0 | -0.699758 | -1.521166 | 2.732082  |
| 26 | 6  | 0 | -0.825921 | -2.678433 | 3.490708  |
| 27 | 1  | 0 | -1.570889 | -4.706432 | 3.486209  |
| 28 | 1  | 0 | -0.205379 | -0.640739 | 3.128967  |
| 29 | 1  | 0 | -0.430577 | -2.708295 | 4.499760  |
| 30 | 7  | 0 | -2.867350 | 1.020958  | -0.370921 |
| 31 | 7  | 0 | -1.177150 | -1.429499 | 1.473911  |
| 32 | 6  | 0 | 0.673532  | -0.655376 | -1.933506 |
| 33 | 1  | 0 | 1.613699  | -1.062011 | -2.319139 |
| 34 | 1  | 0 | 0.314575  | 0.063141  | -2.675565 |
| 35 | 7  | 0 | 0.916982  | 0.101325  | -0.656134 |
| 36 | 6  | 0 | 1.470902  | 1.441486  | -1.068670 |
| 37 | 1  | 0 | 2.377566  | 1.276251  | -1.660571 |
| 38 | 1  | 0 | 0.728647  | 1.893156  | -1.737995 |
| 39 | 6  | 0 | 1.883644  | -0.641752 | 0.265943  |
| 40 | 1  | 0 | 2.003268  | 0.001996  | 1.140301  |
| 41 | 1  | 0 | 1.357979  | -1.540988 | 0.592689  |
| 42 | 6  | 0 | 3.231816  | -1.020525 | -0.307360 |
| 43 | 6  | 0 | 4.336006  | -0.162108 | -0.189411 |
| 44 | 6  | 0 | 3.417637  | -2.272451 | -0.917295 |
| 45 | 6  | 0 | 5.582373  | -0.531542 | -0.696590 |
| 46 | 1  | 0 | 4.229255  | 0.787634  | 0.326535  |
| 47 | 6  | 0 | 4.662152  | -2.643145 | -1.426909 |
| 48 | 1  | 0 | 2.591970  | -2.979556 | -0.970277 |
| 49 | 6  | 0 | 5.745700  | -1.768681 | -1.323083 |

|    |   |   |           |           |           |
|----|---|---|-----------|-----------|-----------|
| 50 | 1 | 0 | 6.429279  | 0.138961  | -0.589610 |
| 51 | 1 | 0 | 4.790024  | -3.616809 | -1.889196 |
| 52 | 1 | 0 | 6.716819  | -2.057745 | -1.711956 |
| 53 | 6 | 0 | 1.768798  | 2.434344  | 0.034169  |
| 54 | 6 | 0 | 2.914311  | 3.232167  | -0.032207 |
| 55 | 6 | 0 | 3.106801  | 4.222877  | 0.932176  |
| 56 | 1 | 0 | 3.637632  | 3.086889  | -0.828181 |
| 57 | 6 | 0 | 1.047966  | 3.531511  | 1.933452  |
| 58 | 6 | 0 | 2.155721  | 4.377072  | 1.939041  |
| 59 | 1 | 0 | 3.985242  | 4.859352  | 0.896839  |
| 60 | 1 | 0 | 0.284401  | 3.616938  | 2.704023  |
| 61 | 1 | 0 | 2.264617  | 5.131209  | 2.710613  |
| 62 | 7 | 0 | 0.849395  | 2.587623  | 1.000366  |
| 63 | 1 | 0 | -0.672100 | 1.538344  | 1.648483  |
| 64 | 1 | 0 | -1.271859 | 1.153321  | 1.945355  |

-----

**TS<sub>B</sub>** (triplet) E(B3LYP/ SDD-6-31G(d,p))= -1491.83050778 hartree

| Center<br>Number | Atomic<br>Number | Atomic<br>Type | Coordinates (Angstroms) |           |           |
|------------------|------------------|----------------|-------------------------|-----------|-----------|
|                  |                  |                | X                       | Y         | Z         |
| 1                | 7                | 0              | -1.449767               | -1.237016 | -0.640785 |
| 2                | 6                | 0              | -2.416284               | -1.113000 | -1.777667 |
| 3                | 1                | 0              | -1.911841               | -0.550950 | -2.571676 |
| 4                | 1                | 0              | -2.618186               | -2.112346 | -2.184905 |
| 5                | 6                | 0              | -2.057627               | -1.972378 | 0.503178  |
| 6                | 1                | 0              | -3.072261               | -1.589747 | 0.650482  |
| 7                | 1                | 0              | -2.149562               | -3.043010 | 0.277684  |
| 8                | 6                | 0              | -0.228513               | -1.965772 | -1.134170 |
| 9                | 1                | 0              | 0.223997                | -2.465849 | -0.275437 |
| 10               | 1                | 0              | -0.515906               | -2.750064 | -1.845367 |
| 11               | 28               | 0              | -0.572839               | 0.555644  | 0.234572  |
| 12               | 6                | 0              | -3.754510               | -0.452183 | -1.497675 |
| 13               | 6                | 0              | -4.907028               | -0.913184 | -2.135283 |
| 14               | 6                | 0              | -4.963606               | 1.278863  | -0.494571 |
| 15               | 6                | 0              | -6.112122               | -0.232132 | -1.947826 |
| 16               | 1                | 0              | -4.863535               | -1.788431 | -2.775260 |
| 17               | 6                | 0              | -6.144839               | 0.886063  | -1.114619 |
| 18               | 1                | 0              | -4.922498               | 2.130175  | 0.179229  |
| 19               | 1                | 0              | -7.014251               | -0.576938 | -2.443050 |
| 20               | 1                | 0              | -7.061839               | 1.437786  | -0.941429 |
| 21               | 6                | 0              | -1.283541               | -1.767673 | 1.790458  |
| 22               | 6                | 0              | -1.350892               | -2.685978 | 2.837349  |

|    |   |   |           |           |           |
|----|---|---|-----------|-----------|-----------|
| 23 | 6 | 0 | -0.694989 | -2.401441 | 4.034934  |
| 24 | 1 | 0 | -1.914044 | -3.605827 | 2.717129  |
| 25 | 6 | 0 | 0.057788  | -0.348029 | 3.060644  |
| 26 | 6 | 0 | 0.018904  | -1.207554 | 4.151644  |
| 27 | 1 | 0 | -0.739659 | -3.101332 | 4.863232  |
| 28 | 1 | 0 | 0.608576  | 0.586253  | 3.097345  |
| 29 | 1 | 0 | 0.541017  | -0.947265 | 5.065439  |
| 30 | 7 | 0 | -3.807238 | 0.626797  | -0.694018 |
| 31 | 7 | 0 | -0.577645 | -0.621602 | 1.904125  |
| 32 | 6 | 0 | 0.783894  | -1.018178 | -1.773435 |
| 33 | 1 | 0 | 1.632080  | -1.587747 | -2.168156 |
| 34 | 1 | 0 | 0.333692  | -0.493182 | -2.621176 |
| 35 | 7 | 0 | 1.224166  | -0.003776 | -0.777949 |
| 36 | 6 | 0 | 1.679435  | 1.267434  | -1.402794 |
| 37 | 1 | 0 | 2.710832  | 1.194247  | -1.762071 |
| 38 | 1 | 0 | 1.050160  | 1.463353  | -2.279413 |
| 39 | 6 | 0 | 2.277252  | -0.541415 | 0.182052  |
| 40 | 1 | 0 | 2.430316  | 0.244689  | 0.926085  |
| 41 | 1 | 0 | 1.823859  | -1.386941 | 0.702758  |
| 42 | 6 | 0 | 3.597744  | -0.947438 | -0.431196 |
| 43 | 6 | 0 | 4.655726  | -0.028759 | -0.525467 |
| 44 | 6 | 0 | 3.807121  | -2.262141 | -0.878243 |
| 45 | 6 | 0 | 5.878346  | -0.404539 | -1.082945 |
| 46 | 1 | 0 | 4.535275  | 0.978120  | -0.131738 |
| 47 | 6 | 0 | 5.028617  | -2.639604 | -1.436904 |
| 48 | 1 | 0 | 3.023730  | -3.008071 | -0.761722 |
| 49 | 6 | 0 | 6.063476  | -1.708578 | -1.546616 |
| 50 | 1 | 0 | 6.689920  | 0.313829  | -1.141377 |
| 51 | 1 | 0 | 5.177740  | -3.661309 | -1.771433 |
| 52 | 1 | 0 | 7.016439  | -2.003223 | -1.974230 |
| 53 | 6 | 0 | 1.521120  | 2.419492  | -0.429843 |
| 54 | 6 | 0 | 2.340707  | 3.545097  | -0.454038 |
| 55 | 6 | 0 | 2.077940  | 4.594160  | 0.428421  |
| 56 | 1 | 0 | 3.166676  | 3.600114  | -1.155616 |
| 57 | 6 | 0 | 0.227556  | 3.335304  | 1.281989  |
| 58 | 6 | 0 | 1.002382  | 4.488803  | 1.312190  |
| 59 | 1 | 0 | 2.703977  | 5.480845  | 0.425767  |
| 60 | 1 | 0 | -0.625691 | 3.207370  | 1.940668  |
| 61 | 1 | 0 | 0.764993  | 5.283258  | 2.010675  |
| 62 | 7 | 0 | 0.484279  | 2.319728  | 0.433674  |
| 63 | 1 | 0 | -2.695602 | 1.035420  | 0.056132  |
| 64 | 1 | 0 | -2.029819 | 1.338391  | 0.630684  |

---

TS<sub>c</sub> (triplet) E(B3LYP/ SDD-6-31G(d,p))= -1491.82563055 hartree

| Center<br>Number | Atomic<br>Number | Atomic<br>Type | Coordinates (Angstroms) |           |           |
|------------------|------------------|----------------|-------------------------|-----------|-----------|
|                  |                  |                | X                       | Y         | Z         |
| 1                | 7                | 0              | 0.790073                | -1.245790 | 1.199161  |
| 2                | 6                | 0              | 1.975729                | -0.867527 | 2.031512  |
| 3                | 1                | 0              | 1.765302                | 0.088621  | 2.526783  |
| 4                | 1                | 0              | 2.149139                | -1.603218 | 2.826819  |
| 5                | 6                | 0              | 0.946682                | -2.684318 | 0.798501  |
| 6                | 1                | 0              | 1.955047                | -2.791820 | 0.389034  |
| 7                | 1                | 0              | 0.894719                | -3.304900 | 1.702252  |
| 8                | 6                | 0              | -0.496060               | -1.017675 | 1.924887  |
| 9                | 1                | 0              | -1.233910               | -1.698413 | 1.497185  |
| 10               | 1                | 0              | -0.399336               | -1.277939 | 2.986684  |
| 11               | 28               | 0              | 0.953941                | 0.352024  | -0.234862 |
| 12               | 6                | 0              | 3.197194                | -0.735326 | 1.143065  |
| 13               | 6                | 0              | 4.472123                | -1.138521 | 1.528580  |
| 14               | 6                | 0              | 3.967954                | -0.104524 | -0.961589 |
| 15               | 6                | 0              | 5.526195                | -1.002073 | 0.622524  |
| 16               | 1                | 0              | 4.635746                | -1.560878 | 2.514618  |
| 17               | 6                | 0              | 5.267908                | -0.488826 | -0.649063 |
| 18               | 1                | 0              | 3.718809                | 0.283625  | -1.944453 |
| 19               | 1                | 0              | 6.529306                | -1.310069 | 0.899821  |
| 20               | 1                | 0              | 6.053693                | -0.392465 | -1.389859 |
| 21               | 6                | 0              | -0.039581               | -3.203996 | -0.226077 |
| 22               | 6                | 0              | -0.755795               | -4.379107 | 0.010254  |
| 23               | 6                | 0              | -1.561255               | -4.899132 | -1.006553 |
| 24               | 1                | 0              | -0.674184               | -4.889394 | 0.964839  |
| 25               | 6                | 0              | -0.896425               | -3.045775 | -2.368143 |
| 26               | 6                | 0              | -1.630009               | -4.223923 | -2.222595 |
| 27               | 1                | 0              | -2.119832               | -5.816165 | -0.848446 |
| 28               | 1                | 0              | -0.928577               | -2.483649 | -3.298442 |
| 29               | 1                | 0              | -2.235593               | -4.594236 | -3.042422 |
| 30               | 7                | 0              | 2.956161                | -0.206497 | -0.078759 |
| 31               | 7                | 0              | -0.117392               | -2.546191 | -1.398200 |
| 32               | 6                | 0              | -0.971761               | 0.430384  | 1.793527  |
| 33               | 1                | 0              | -1.958233               | 0.536576  | 2.259549  |
| 34               | 1                | 0              | -0.294263               | 1.106000  | 2.328561  |
| 35               | 7                | 0              | -1.008851               | 0.880522  | 0.365772  |
| 36               | 6                | 0              | -1.172979               | 2.362203  | 0.289677  |
| 37               | 1                | 0              | -1.974606               | 2.596011  | -0.414935 |
| 38               | 1                | 0              | -1.513619               | 2.759565  | 1.252131  |
| 39               | 6                | 0              | -2.088276               | 0.180314  | -0.454242 |

|    |   |   |           |           |           |
|----|---|---|-----------|-----------|-----------|
| 40 | 1 | 0 | -1.913000 | 0.492068  | -1.487539 |
| 41 | 1 | 0 | -1.874780 | -0.887354 | -0.406159 |
| 42 | 6 | 0 | -3.520349 | 0.467001  | -0.062944 |
| 43 | 6 | 0 | -4.263350 | 1.430853  | -0.763484 |
| 44 | 6 | 0 | -4.151201 | -0.244585 | 0.971196  |
| 45 | 6 | 0 | -5.587878 | 1.702157  | -0.418825 |
| 46 | 1 | 0 | -3.817425 | 1.952141  | -1.608184 |
| 47 | 6 | 0 | -5.474497 | 0.027023  | 1.319412  |
| 48 | 1 | 0 | -3.621703 | -1.039005 | 1.492181  |
| 49 | 6 | 0 | -6.192552 | 1.006363  | 0.629365  |
| 50 | 1 | 0 | -6.150261 | 2.444012  | -0.976811 |
| 51 | 1 | 0 | -5.949677 | -0.534815 | 2.117327  |
| 52 | 1 | 0 | -7.224377 | 1.212220  | 0.895371  |
| 53 | 6 | 0 | 0.074584  | 3.097404  | -0.151693 |
| 54 | 6 | 0 | 0.092079  | 4.493771  | -0.178289 |
| 55 | 6 | 0 | 1.226406  | 5.154395  | -0.638582 |
| 56 | 1 | 0 | -0.778895 | 5.049646  | 0.154429  |
| 57 | 6 | 0 | 2.245750  | 3.018813  | -0.991013 |
| 58 | 6 | 0 | 2.326460  | 4.400088  | -1.057753 |
| 59 | 1 | 0 | 1.255239  | 6.238892  | -0.670778 |
| 60 | 1 | 0 | 3.080051  | 2.397005  | -1.289905 |
| 61 | 1 | 0 | 3.230341  | 4.872904  | -1.424672 |
| 62 | 7 | 0 | 1.141448  | 2.372316  | -0.549759 |
| 63 | 1 | 0 | 0.533255  | -0.814983 | -1.708383 |
| 64 | 1 | 0 | 0.718624  | -0.079953 | -1.957902 |

## Co

1'-H<sub>2</sub>O (quartet) E(B3LYP/ SDD-6-31G(d,p))= -1542.03365992 hartree

| Center<br>Number | Atomic<br>Number | Atomic<br>Type | Coordinates (Angstroms) |           |          |
|------------------|------------------|----------------|-------------------------|-----------|----------|
|                  |                  |                | X                       | Y         | Z        |
| 1                | 7                | 0              | 0.806867                | -0.843152 | 1.539301 |
| 2                | 6                | 0              | 1.897366                | -0.094585 | 2.205289 |
| 3                | 1                | 0              | 1.552004                | 0.930555  | 2.379037 |
| 4                | 1                | 0              | 2.143505                | -0.521812 | 3.186957 |
| 5                | 6                | 0              | 1.128382                | -2.291239 | 1.472591 |
| 6                | 1                | 0              | 2.216702                | -2.400085 | 1.421473 |
| 7                | 1                | 0              | 0.804826                | -2.811590 | 2.382823 |
| 8                | 6                | 0              | -0.527705               | -0.605133 | 2.155905 |
| 9                | 1                | 0              | -1.136532               | -1.493590 | 1.973753 |



|    |    |   |           |           |           |
|----|----|---|-----------|-----------|-----------|
| 10 | 1  | 0 | -0.445083 | -0.498559 | 3.245448  |
| 11 | 27 | 0 | 0.760983  | -0.065702 | -0.534720 |
| 12 | 6  | 0 | 3.124282  | -0.073787 | 1.314313  |
| 13 | 6  | 0 | 4.420378  | -0.046882 | 1.827580  |
| 14 | 6  | 0 | 3.931576  | -0.077996 | -0.864136 |
| 15 | 6  | 0 | 5.500417  | -0.029137 | 0.944215  |
| 16 | 1  | 0 | 4.579870  | -0.047240 | 2.901091  |
| 17 | 6  | 0 | 5.252574  | -0.052060 | -0.429295 |
| 18 | 1  | 0 | 3.691458  | -0.094807 | -1.922850 |
| 19 | 1  | 0 | 6.517764  | -0.009854 | 1.321932  |
| 20 | 1  | 0 | 6.062583  | -0.054213 | -1.150140 |
| 21 | 6  | 0 | 0.536632  | -2.948343 | 0.244554  |
| 22 | 6  | 0 | 0.223045  | -4.307288 | 0.226156  |
| 23 | 6  | 0 | -0.247076 | -4.883150 | -0.953354 |
| 24 | 1  | 0 | 0.348988  | -4.904396 | 1.123650  |
| 25 | 6  | 0 | -0.085598 | -2.728294 | -1.980332 |
| 26 | 6  | 0 | -0.404722 | -4.076795 | -2.081516 |
| 27 | 1  | 0 | -0.493338 | -5.939590 | -0.988946 |
| 28 | 1  | 0 | -0.226380 | -2.062337 | -2.825544 |
| 29 | 1  | 0 | -0.776084 | -4.478693 | -3.017537 |
| 30 | 7  | 0 | 2.885540  | -0.081456 | -0.015726 |
| 31 | 7  | 0 | 0.383704  | -2.167026 | -0.847094 |
| 32 | 6  | 0 | -1.209528 | 0.626126  | 1.565854  |
| 33 | 1  | 0 | -2.202638 | 0.748939  | 2.013910  |
| 34 | 1  | 0 | -0.634806 | 1.523732  | 1.809912  |
| 35 | 7  | 0 | -1.306589 | 0.542958  | 0.078932  |
| 36 | 6  | 0 | -1.570903 | 1.887883  | -0.485637 |
| 37 | 1  | 0 | -1.848191 | 1.756476  | -1.538406 |
| 38 | 1  | 0 | -2.426825 | 2.368243  | 0.002065  |
| 39 | 6  | 0 | -2.377954 | -0.430127 | -0.378340 |
| 40 | 1  | 0 | -2.279702 | -0.488951 | -1.466551 |
| 41 | 1  | 0 | -2.107333 | -1.409576 | 0.018959  |
| 42 | 6  | 0 | -3.805208 | -0.092770 | -0.001045 |
| 43 | 6  | 0 | -4.614098 | 0.665781  | -0.861184 |
| 44 | 6  | 0 | -4.359564 | -0.565463 | 1.199193  |
| 45 | 6  | 0 | -5.932446 | 0.967442  | -0.518890 |
| 46 | 1  | 0 | -4.222602 | 1.003024  | -1.818190 |
| 47 | 6  | 0 | -5.677072 | -0.263131 | 1.545332  |
| 48 | 1  | 0 | -3.769406 | -1.197995 | 1.858979  |
| 49 | 6  | 0 | -6.463781 | 0.508928  | 0.688466  |
| 50 | 1  | 0 | -6.548231 | 1.547079  | -1.199351 |
| 51 | 1  | 0 | -6.092862 | -0.641163 | 2.473979  |
| 52 | 1  | 0 | -7.491353 | 0.737839  | 0.952269  |
| 53 | 6  | 0 | -0.354402 | 2.780282  | -0.414256 |

|    |   |   |           |           |           |
|----|---|---|-----------|-----------|-----------|
| 54 | 6 | 0 | -0.477646 | 4.167443  | -0.324204 |
| 55 | 6 | 0 | 0.671145  | 4.956238  | -0.336004 |
| 56 | 1 | 0 | -1.461904 | 4.618137  | -0.247980 |
| 57 | 6 | 0 | 1.956621  | 2.942095  | -0.497569 |
| 58 | 6 | 0 | 1.914884  | 4.329880  | -0.427671 |
| 59 | 1 | 0 | 0.597560  | 6.037115  | -0.269915 |
| 60 | 1 | 0 | 2.904372  | 2.419513  | -0.556955 |
| 61 | 1 | 0 | 2.836481  | 4.901172  | -0.438486 |
| 62 | 7 | 0 | 0.848655  | 2.170959  | -0.494109 |
| 63 | 8 | 0 | 0.887267  | 0.295114  | -2.703862 |
| 64 | 1 | 0 | 1.206485  | -0.283121 | -3.410292 |
| 65 | 1 | 0 | 1.031187  | 1.207300  | -2.991969 |

-----  
**1'-H<sub>2</sub>O** (doublet) E(B3LYP/ SDD-6-31G(d,p))= -1542.01484898 hartree  
 -----

| Center<br>Number | Atomic<br>Number | Atomic<br>Type | Coordinates (Angstroms) |           |           |
|------------------|------------------|----------------|-------------------------|-----------|-----------|
|                  |                  |                | X                       | Y         | Z         |
| 1                | 7                | 0              | -0.778712               | -0.772140 | -1.733638 |
| 2                | 6                | 0              | -1.931109               | -0.024198 | -2.273836 |
| 3                | 1                | 0              | -1.622478               | 1.014289  | -2.439177 |
| 4                | 1                | 0              | -2.277223               | -0.416481 | -3.240310 |
| 5                | 6                | 0              | -1.064752               | -2.220328 | -1.632022 |
| 6                | 1                | 0              | -2.143002               | -2.378626 | -1.741110 |
| 7                | 1                | 0              | -0.593283               | -2.780806 | -2.448165 |
| 8                | 6                | 0              | 0.551683                | -0.487100 | -2.328897 |
| 9                | 1                | 0              | 1.137392                | -1.407855 | -2.277269 |
| 10               | 1                | 0              | 0.474269                | -0.226079 | -3.392345 |
| 11               | 27               | 0              | -0.708622               | 0.064267  | 0.294496  |
| 12               | 6                | 0              | -3.058268               | -0.075043 | -1.252199 |
| 13               | 6                | 0              | -4.402806               | -0.116161 | -1.612615 |
| 14               | 6                | 0              | -3.619230               | -0.156444 | 1.014855  |
| 15               | 6                | 0              | -5.377675               | -0.172312 | -0.613883 |
| 16               | 1                | 0              | -4.681653               | -0.112158 | -2.661423 |
| 17               | 6                | 0              | -4.979327               | -0.198508 | 0.722434  |
| 18               | 1                | 0              | -3.247674               | -0.160784 | 2.033277  |
| 19               | 1                | 0              | -6.429928               | -0.205897 | -0.877819 |
| 20               | 1                | 0              | -5.703700               | -0.253465 | 1.527366  |
| 21               | 6                | 0              | -0.645515               | -2.785108 | -0.290164 |
| 22               | 6                | 0              | -0.467599               | -4.156611 | -0.103849 |
| 23               | 6                | 0              | -0.158225               | -4.639595 | 1.165361  |
| 24               | 1                | 0              | -0.575326               | -4.833365 | -0.945663 |
| 25               | 6                | 0              | -0.203877               | -2.379092 | 1.952559  |
| 26               | 6                | 0              | -0.026607               | -3.730676 | 2.216887  |

|    |   |   |           |           |           |
|----|---|---|-----------|-----------|-----------|
| 27 | 1 | 0 | -0.018280 | -5.703014 | 1.330828  |
| 28 | 1 | 0 | -0.089683 | -1.635705 | 2.731759  |
| 29 | 1 | 0 | 0.217327  | -4.058571 | 3.221150  |
| 30 | 7 | 0 | -2.680058 | -0.089593 | 0.052829  |
| 31 | 7 | 0 | -0.507869 | -1.907078 | 0.725613  |
| 32 | 6 | 0 | 1.281066  | 0.632908  | -1.586253 |
| 33 | 1 | 0 | 2.311213  | 0.711652  | -1.950006 |
| 34 | 1 | 0 | 0.794173  | 1.588144  | -1.791357 |
| 35 | 7 | 0 | 1.280415  | 0.432995  | -0.091678 |
| 36 | 6 | 0 | 1.587053  | 1.732177  | 0.568724  |
| 37 | 1 | 0 | 1.740403  | 1.532359  | 1.635055  |
| 38 | 1 | 0 | 2.515579  | 2.167529  | 0.184381  |
| 39 | 6 | 0 | 2.291377  | -0.617853 | 0.341643  |
| 40 | 1 | 0 | 2.138988  | -0.745282 | 1.416229  |
| 41 | 1 | 0 | 1.994917  | -1.550736 | -0.139480 |
| 42 | 6 | 0 | 3.744887  | -0.315525 | 0.048761  |
| 43 | 6 | 0 | 4.538779  | 0.362618  | 0.987050  |
| 44 | 6 | 0 | 4.340166  | -0.750465 | -1.146215 |
| 45 | 6 | 0 | 5.883570  | 0.625443  | 0.725218  |
| 46 | 1 | 0 | 4.113088  | 0.665752  | 1.940895  |
| 47 | 6 | 0 | 5.684667  | -0.487725 | -1.411095 |
| 48 | 1 | 0 | 3.759292  | -1.323440 | -1.865959 |
| 49 | 6 | 0 | 6.456654  | 0.206306  | -0.477430 |
| 50 | 1 | 0 | 6.486950  | 1.142951  | 1.464311  |
| 51 | 1 | 0 | 6.131991  | -0.836445 | -2.336487 |
| 52 | 1 | 0 | 7.504647  | 0.404347  | -0.678329 |
| 53 | 6 | 0 | 0.430441  | 2.680298  | 0.403857  |
| 54 | 6 | 0 | 0.583762  | 4.064463  | 0.453938  |
| 55 | 6 | 0 | -0.541121 | 4.879120  | 0.335746  |
| 56 | 1 | 0 | 1.572466  | 4.492749  | 0.581855  |
| 57 | 6 | 0 | -1.866023 | 2.892772  | 0.112267  |
| 58 | 6 | 0 | -1.789243 | 4.279373  | 0.161946  |
| 59 | 1 | 0 | -0.445023 | 5.959566  | 0.372112  |
| 60 | 1 | 0 | -2.817925 | 2.395974  | -0.023558 |
| 61 | 1 | 0 | -2.691816 | 4.871600  | 0.060557  |
| 62 | 7 | 0 | -0.780694 | 2.096279  | 0.231003  |
| 63 | 8 | 0 | -0.945074 | 0.679259  | 2.815514  |
| 64 | 1 | 0 | -0.948855 | 0.307740  | 3.708692  |
| 65 | 1 | 0 | -1.101403 | 1.625151  | 2.938869  |

-----  
**2'<sub>dp</sub>-H<sub>2</sub>O** (triplet) E(B3LYP/ SDD-6-31G(d,p))= -1542.28099021 hartree  
 -----

| Center<br>Number | Atomic<br>Number | Atomic<br>Type | Coordinates (Angstroms) |   |   |
|------------------|------------------|----------------|-------------------------|---|---|
|                  |                  |                | X                       | Y | Z |

|    |    |   |           |           |           |
|----|----|---|-----------|-----------|-----------|
| 1  | 7  | 0 | -0.809548 | -0.866173 | -1.549124 |
| 2  | 6  | 0 | -1.908632 | -0.151692 | -2.211122 |
| 3  | 1  | 0 | -1.587149 | 0.884760  | -2.366728 |
| 4  | 1  | 0 | -2.143278 | -0.566998 | -3.205620 |
| 5  | 6  | 0 | -1.086974 | -2.309772 | -1.416090 |
| 6  | 1  | 0 | -2.169940 | -2.438145 | -1.319417 |
| 7  | 1  | 0 | -0.780809 | -2.872396 | -2.310601 |
| 8  | 6  | 0 | 0.521479  | -0.607849 | -2.137517 |
| 9  | 1  | 0 | 1.136231  | -1.494112 | -1.957870 |
| 10 | 1  | 0 | 0.461046  | -0.491242 | -3.230610 |
| 11 | 27 | 0 | -0.893425 | -0.056531 | 0.554506  |
| 12 | 6  | 0 | -3.161834 | -0.158009 | -1.350294 |
| 13 | 6  | 0 | -4.431793 | -0.140393 | -1.925117 |
| 14 | 6  | 0 | -4.073860 | -0.176561 | 0.775139  |
| 15 | 6  | 0 | -5.559529 | -0.123338 | -1.102847 |
| 16 | 1  | 0 | -4.533054 | -0.143148 | -3.006193 |
| 17 | 6  | 0 | -5.373855 | -0.146063 | 0.279418  |
| 18 | 1  | 0 | -3.891203 | -0.206516 | 1.845898  |
| 19 | 1  | 0 | -6.556229 | -0.104898 | -1.531576 |
| 20 | 1  | 0 | -6.215699 | -0.148521 | 0.963598  |
| 21 | 6  | 0 | -0.441997 | -2.894860 | -0.176120 |
| 22 | 6  | 0 | 0.035175  | -4.204096 | -0.147869 |
| 23 | 6  | 0 | 0.546866  | -4.721654 | 1.043133  |
| 24 | 1  | 0 | -0.000005 | -4.809779 | -1.048360 |
| 25 | 6  | 0 | 0.091548  | -2.596517 | 2.055282  |
| 26 | 6  | 0 | 0.571286  | -3.898152 | 2.168155  |
| 27 | 1  | 0 | 0.920099  | -5.739695 | 1.088297  |
| 28 | 1  | 0 | 0.114945  | -1.915907 | 2.900242  |
| 29 | 1  | 0 | 0.962222  | -4.249410 | 3.117116  |
| 30 | 7  | 0 | -2.976100 | -0.172444 | -0.007639 |
| 31 | 7  | 0 | -0.411630 | -2.089061 | 0.911546  |
| 32 | 6  | 0 | 1.210723  | 0.622986  | -1.542336 |
| 33 | 1  | 0 | 2.174856  | 0.771684  | -2.050975 |
| 34 | 1  | 0 | 0.605906  | 1.509263  | -1.752913 |
| 35 | 7  | 0 | 1.373635  | 0.533194  | -0.075165 |
| 36 | 6  | 0 | 1.572044  | 1.860655  | 0.518919  |
| 37 | 1  | 0 | 1.816527  | 1.709809  | 1.578591  |
| 38 | 1  | 0 | 2.423165  | 2.401787  | 0.078496  |
| 39 | 6  | 0 | 2.438903  | -0.419956 | 0.354601  |
| 40 | 1  | 0 | 2.361705  | -0.492055 | 1.443944  |
| 41 | 1  | 0 | 2.173573  | -1.403530 | -0.039695 |
| 42 | 6  | 0 | 3.865730  | -0.078218 | -0.040522 |
| 43 | 6  | 0 | 4.678036  | 0.698299  | 0.799183  |

|    |   |   |           |           |           |
|----|---|---|-----------|-----------|-----------|
| 44 | 6 | 0 | 4.409564  | -0.542203 | -1.247833 |
| 45 | 6 | 0 | 5.985767  | 1.021038  | 0.434913  |
| 46 | 1 | 0 | 4.291281  | 1.037757  | 1.757209  |
| 47 | 6 | 0 | 5.716375  | -0.220571 | -1.617811 |
| 48 | 1 | 0 | 3.813216  | -1.179121 | -1.897325 |
| 49 | 6 | 0 | 6.506311  | 0.566487  | -0.778262 |
| 50 | 1 | 0 | 6.601139  | 1.617123  | 1.102266  |
| 51 | 1 | 0 | 6.120480  | -0.593000 | -2.554465 |
| 52 | 1 | 0 | 7.525204  | 0.812728  | -1.061070 |
| 53 | 6 | 0 | 0.334195  | 2.729464  | 0.437999  |
| 54 | 6 | 0 | 0.447846  | 4.119909  | 0.378279  |
| 55 | 6 | 0 | -0.701998 | 4.906769  | 0.380349  |
| 56 | 1 | 0 | 1.432872  | 4.574075  | 0.333044  |
| 57 | 6 | 0 | -1.974092 | 2.879101  | 0.467532  |
| 58 | 6 | 0 | -1.941826 | 4.268554  | 0.428889  |
| 59 | 1 | 0 | -0.632162 | 5.989073  | 0.339395  |
| 60 | 1 | 0 | -2.918923 | 2.346759  | 0.488877  |
| 61 | 1 | 0 | -2.869145 | 4.831449  | 0.428345  |
| 62 | 7 | 0 | -0.866126 | 2.105682  | 0.473507  |
| 63 | 8 | 0 | -0.946176 | 0.309151  | 2.908005  |
| 64 | 1 | 0 | -1.664020 | -0.121171 | 3.391004  |
| 65 | 1 | 0 | -1.105322 | 1.257969  | 3.001199  |

-----  
**2'<sub>dp</sub>-H<sub>2</sub>O** (singlet) E(B3LYP/ SDD-6-31G(d,p))= -1542.24523559 hartree  
 -----

| Center<br>Number | Atomic<br>Number | Atomic<br>Type | Coordinates (Angstroms) |           |           |
|------------------|------------------|----------------|-------------------------|-----------|-----------|
|                  |                  |                | X                       | Y         | Z         |
| 1                | 7                | 0              | -0.686904               | -0.892892 | -1.848242 |
| 2                | 6                | 0              | -1.842711               | -0.168051 | -2.378895 |
| 3                | 1                | 0              | -1.538080               | 0.868275  | -2.564855 |
| 4                | 1                | 0              | -2.202551               | -0.575839 | -3.338319 |
| 5                | 6                | 0              | -0.912624               | -2.318743 | -1.628923 |
| 6                | 1                | 0              | -1.971010               | -2.542636 | -1.808383 |
| 7                | 1                | 0              | -0.352557               | -2.939115 | -2.342617 |
| 8                | 6                | 0              | 0.641649                | -0.538751 | -2.365954 |
| 9                | 1                | 0              | 1.272296                | -1.428444 | -2.286456 |
| 10               | 1                | 0              | 0.610869                | -0.282753 | -3.436105 |
| 11               | 27               | 0              | -0.710297               | 0.182774  | 0.234550  |
| 12               | 6                | 0              | -2.983768               | -0.177263 | -1.371142 |
| 13               | 6                | 0              | -4.311955               | -0.333773 | -1.762416 |
| 14               | 6                | 0              | -3.613975               | -0.059138 | 0.871929  |
| 15               | 6                | 0              | -5.317615               | -0.340242 | -0.794458 |
| 16               | 1                | 0              | -4.550964               | -0.453728 | -2.814263 |

|    |   |   |           |           |           |
|----|---|---|-----------|-----------|-----------|
| 17 | 6 | 0 | -4.960188 | -0.207368 | 0.545557  |
| 18 | 1 | 0 | -3.278303 | 0.056123  | 1.898824  |
| 19 | 1 | 0 | -6.357281 | -0.457674 | -1.083334 |
| 20 | 1 | 0 | -5.704912 | -0.219356 | 1.333759  |
| 21 | 6 | 0 | -0.588305 | -2.758301 | -0.207270 |
| 22 | 6 | 0 | -0.394536 | -4.110614 | 0.081875  |
| 23 | 6 | 0 | -0.185044 | -4.506199 | 1.399951  |
| 24 | 1 | 0 | -0.413761 | -4.840029 | -0.722493 |
| 25 | 6 | 0 | -0.372371 | -2.200158 | 2.032295  |
| 26 | 6 | 0 | -0.184261 | -3.529760 | 2.395369  |
| 27 | 1 | 0 | -0.031423 | -5.552552 | 1.644718  |
| 28 | 1 | 0 | -0.398902 | -1.415332 | 2.780596  |
| 29 | 1 | 0 | -0.039755 | -3.784550 | 3.439466  |
| 30 | 7 | 0 | -2.643994 | -0.033159 | -0.064515 |
| 31 | 7 | 0 | -0.557442 | -1.808559 | 0.751487  |
| 32 | 6 | 0 | 1.301051  | 0.629898  | -1.618663 |
| 33 | 1 | 0 | 2.327361  | 0.759009  | -1.987348 |
| 34 | 1 | 0 | 0.763537  | 1.554808  | -1.839870 |
| 35 | 7 | 0 | 1.295748  | 0.468746  | -0.128945 |
| 36 | 6 | 0 | 1.614248  | 1.771940  | 0.516479  |
| 37 | 1 | 0 | 1.771250  | 1.565602  | 1.582079  |
| 38 | 1 | 0 | 2.540875  | 2.210247  | 0.126462  |
| 39 | 6 | 0 | 2.259596  | -0.591636 | 0.339729  |
| 40 | 1 | 0 | 2.085647  | -0.696152 | 1.413374  |
| 41 | 1 | 0 | 1.950202  | -1.529998 | -0.122243 |
| 42 | 6 | 0 | 3.731640  | -0.342833 | 0.070754  |
| 43 | 6 | 0 | 4.530748  | 0.319266  | 1.015056  |
| 44 | 6 | 0 | 4.337182  | -0.802502 | -1.108778 |
| 45 | 6 | 0 | 5.887464  | 0.540455  | 0.776397  |
| 46 | 1 | 0 | 4.093486  | 0.648586  | 1.954446  |
| 47 | 6 | 0 | 5.693555  | -0.582648 | -1.352215 |
| 48 | 1 | 0 | 3.749607  | -1.357053 | -1.836859 |
| 49 | 6 | 0 | 6.470657  | 0.094933  | -0.411289 |
| 50 | 1 | 0 | 6.490700  | 1.049693  | 1.521872  |
| 51 | 1 | 0 | 6.144762  | -0.949706 | -2.269094 |
| 52 | 1 | 0 | 7.527362  | 0.261933  | -0.595828 |
| 53 | 6 | 0 | 0.456048  | 2.712649  | 0.364785  |
| 54 | 6 | 0 | 0.606416  | 4.093246  | 0.335506  |
| 55 | 6 | 0 | -0.521835 | 4.911984  | 0.269261  |
| 56 | 1 | 0 | 1.604507  | 4.518743  | 0.371195  |
| 57 | 6 | 0 | -1.852982 | 2.908193  | 0.231353  |
| 58 | 6 | 0 | -1.772225 | 4.293096  | 0.218501  |
| 59 | 1 | 0 | -0.427600 | 5.992245  | 0.253668  |
| 60 | 1 | 0 | -2.813542 | 2.412686  | 0.188712  |

|    |   |   |           |          |          |
|----|---|---|-----------|----------|----------|
| 61 | 1 | 0 | -2.686301 | 4.874685 | 0.162266 |
| 62 | 7 | 0 | -0.762896 | 2.095233 | 0.310694 |
| 63 | 8 | 0 | -1.422740 | 0.528304 | 3.261615 |
| 64 | 1 | 0 | -1.328817 | 1.395214 | 3.677775 |
| 65 | 1 | 0 | -1.083510 | 0.644075 | 2.340962 |

-----  
**1'** (quartet) E(B3LYP/ SDD-6-31G(d,p))= -1465.59413739 hartree  
 -----

| Center<br>Number | Atomic<br>Number | Atomic<br>Type | Coordinates (Angstroms) |           |           |
|------------------|------------------|----------------|-------------------------|-----------|-----------|
|                  |                  |                | X                       | Y         | Z         |
| 1                | 7                | 0              | -1.248353               | -1.536295 | -1.210114 |
| 2                | 6                | 0              | -2.168074               | -1.060767 | -2.269168 |
| 3                | 1                | 0              | -1.572789               | -0.601626 | -3.065463 |
| 4                | 1                | 0              | -2.715015               | -1.891302 | -2.733260 |
| 5                | 6                | 0              | -1.881325               | -2.599674 | -0.393679 |
| 6                | 1                | 0              | -2.963369               | -2.422623 | -0.392737 |
| 7                | 1                | 0              | -1.726505               | -3.592397 | -0.835501 |
| 8                | 6                | 0              | 0.081077                | -1.934395 | -1.750267 |
| 9                | 1                | 0              | 0.555207                | -2.586958 | -1.012623 |
| 10               | 1                | 0              | -0.022495               | -2.520219 | -2.673246 |
| 11               | 27               | 0              | -0.847553               | 0.173515  | 0.165967  |
| 12               | 6                | 0              | -3.126941               | -0.017388 | -1.735336 |
| 13               | 6                | 0              | -4.381925               | 0.194521  | -2.301243 |
| 14               | 6                | 0              | -3.445201               | 1.749194  | -0.253068 |
| 15               | 6                | 0              | -5.182096               | 1.229133  | -1.815611 |
| 16               | 1                | 0              | -4.724981               | -0.439164 | -3.112690 |
| 17               | 6                | 0              | -4.703466               | 2.024690  | -0.773649 |
| 18               | 1                | 0              | -3.033134               | 2.342124  | 0.556630  |
| 19               | 1                | 0              | -6.163090               | 1.410164  | -2.243298 |
| 20               | 1                | 0              | -5.291619               | 2.840071  | -0.368007 |
| 21               | 6                | 0              | -1.411404               | -2.577554 | 1.045932  |
| 22               | 6                | 0              | -1.445181               | -3.717087 | 1.847281  |
| 23               | 6                | 0              | -1.093199               | -3.615474 | 3.193343  |
| 24               | 1                | 0              | -1.749123               | -4.668734 | 1.423395  |
| 25               | 6                | 0              | -0.679971               | -1.284915 | 2.841925  |
| 26               | 6                | 0              | -0.706085               | -2.374620 | 3.702586  |
| 27               | 1                | 0              | -1.117760               | -4.491717 | 3.833412  |
| 28               | 1                | 0              | -0.370171               | -0.304123 | 3.189089  |
| 29               | 1                | 0              | -0.423506               | -2.252202 | 4.742044  |
| 30               | 7                | 0              | -2.669250               | 0.746858  | -0.717277 |
| 31               | 7                | 0              | -1.026366               | -1.378299 | 1.539921  |
| 32               | 6                | 0              | 0.954335                | -0.703113 | -2.008949 |

|    |   |   |           |           |           |
|----|---|---|-----------|-----------|-----------|
| 33 | 1 | 0 | 1.934443  | -1.009115 | -2.389605 |
| 34 | 1 | 0 | 0.499730  | -0.072867 | -2.778725 |
| 35 | 7 | 0 | 1.083107  | 0.111453  | -0.768581 |
| 36 | 6 | 0 | 1.358977  | 1.548025  | -1.037048 |
| 37 | 1 | 0 | 2.406582  | 1.713493  | -1.309762 |
| 38 | 1 | 0 | 0.750887  | 1.856275  | -1.896105 |
| 39 | 6 | 0 | 2.107501  | -0.470653 | 0.201220  |
| 40 | 1 | 0 | 2.032041  | 0.123907  | 1.115772  |
| 41 | 1 | 0 | 1.765239  | -1.478374 | 0.446185  |
| 42 | 6 | 0 | 3.538935  | -0.505860 | -0.283370 |
| 43 | 6 | 0 | 4.406649  | 0.568794  | -0.029853 |
| 44 | 6 | 0 | 4.039226  | -1.629802 | -0.960338 |
| 45 | 6 | 0 | 5.729921  | 0.535143  | -0.470762 |
| 46 | 1 | 0 | 4.056093  | 1.424619  | 0.542928  |
| 47 | 6 | 0 | 5.362033  | -1.664812 | -1.402594 |
| 48 | 1 | 0 | 3.403231  | -2.498125 | -1.118266 |
| 49 | 6 | 0 | 6.206931  | -0.578897 | -1.164546 |
| 50 | 1 | 0 | 6.391946  | 1.369157  | -0.260314 |
| 51 | 1 | 0 | 5.736604  | -2.543179 | -1.918480 |
| 52 | 1 | 0 | 7.237935  | -0.608391 | -1.502111 |
| 53 | 6 | 0 | 0.982467  | 2.405183  | 0.160230  |
| 54 | 6 | 0 | 1.643772  | 3.598236  | 0.447163  |
| 55 | 6 | 0 | 1.224409  | 4.368196  | 1.532219  |
| 56 | 1 | 0 | 2.475438  | 3.917623  | -0.172372 |
| 57 | 6 | 0 | -0.453315 | 2.719172  | 1.971476  |
| 58 | 6 | 0 | 0.157386  | 3.919224  | 2.312860  |
| 59 | 1 | 0 | 1.727372  | 5.300309  | 1.769548  |
| 60 | 1 | 0 | -1.283358 | 2.328601  | 2.553341  |
| 61 | 1 | 0 | -0.193485 | 4.482739  | 3.170102  |
| 62 | 7 | 0 | -0.057861 | 1.976299  | 0.915837  |

-----

**1'** (doublet) E(B3LYP/ SDD-6-31G(d,p))= -1465.57837194 hartree

| Center<br>Number | Atomic<br>Number | Atomic<br>Type | Coordinates (Angstroms) |           |           |
|------------------|------------------|----------------|-------------------------|-----------|-----------|
|                  |                  |                | X                       | Y         | Z         |
| 1                | 7                | 0              | -1.137158               | -1.547519 | -1.109797 |
| 2                | 6                | 0              | -2.131073               | -1.243337 | -2.180626 |
| 3                | 1                | 0              | -1.609660               | -0.737596 | -3.000934 |
| 4                | 1                | 0              | -2.562227               | -2.163293 | -2.593845 |
| 5                | 6                | 0              | -1.706876               | -2.546129 | -0.148224 |
| 6                | 1                | 0              | -2.790878               | -2.395988 | -0.115817 |
| 7                | 1                | 0              | -1.534214               | -3.564892 | -0.513517 |



|    |    |   |           |           |           |
|----|----|---|-----------|-----------|-----------|
| 8  | 6  | 0 | 0.184369  | -2.008372 | -1.659517 |
| 9  | 1  | 0 | 0.660830  | -2.615937 | -0.887340 |
| 10 | 1  | 0 | 0.036940  | -2.651049 | -2.535382 |
| 11 | 27 | 0 | -0.818773 | 0.171398  | -0.168167 |
| 12 | 6  | 0 | -3.198176 | -0.333745 | -1.614283 |
| 13 | 6  | 0 | -4.490920 | -0.282426 | -2.126139 |
| 14 | 6  | 0 | -3.687298 | 1.316772  | -0.053267 |
| 15 | 6  | 0 | -5.403374 | 0.617450  | -1.573858 |
| 16 | 1  | 0 | -4.777716 | -0.934989 | -2.944317 |
| 17 | 6  | 0 | -4.992764 | 1.430465  | -0.517859 |
| 18 | 1  | 0 | -3.337042 | 1.932692  | 0.765162  |
| 19 | 1  | 0 | -6.416513 | 0.677594  | -1.958142 |
| 20 | 1  | 0 | -5.668882 | 2.140604  | -0.055266 |
| 21 | 6  | 0 | -1.156177 | -2.352202 | 1.246482  |
| 22 | 6  | 0 | -1.107400 | -3.390927 | 2.174421  |
| 23 | 6  | 0 | -0.681102 | -3.114007 | 3.473859  |
| 24 | 1  | 0 | -1.404185 | -4.394977 | 1.888410  |
| 25 | 6  | 0 | -0.367646 | -0.833408 | 2.809195  |
| 26 | 6  | 0 | -0.308497 | -1.809388 | 3.799139  |
| 27 | 1  | 0 | -0.638522 | -3.903571 | 4.217215  |
| 28 | 1  | 0 | -0.069797 | 0.189735  | 3.015907  |
| 29 | 1  | 0 | 0.028977  | -1.550832 | 4.796621  |
| 30 | 7  | 0 | -2.797525 | 0.454784  | -0.583653 |
| 31 | 7  | 0 | -0.784592 | -1.091723 | 1.556090  |
| 32 | 6  | 0 | 1.053046  | -0.802397 | -2.000073 |
| 33 | 1  | 0 | 2.051682  | -1.117215 | -2.319283 |
| 34 | 1  | 0 | 0.614438  | -0.238955 | -2.828821 |
| 35 | 7  | 0 | 1.117109  | 0.103237  | -0.808635 |
| 36 | 6  | 0 | 1.369967  | 1.528870  | -1.185170 |
| 37 | 1  | 0 | 2.432883  | 1.716038  | -1.365253 |
| 38 | 1  | 0 | 0.840970  | 1.735093  | -2.123174 |
| 39 | 6  | 0 | 2.129145  | -0.372708 | 0.230966  |
| 40 | 1  | 0 | 1.999967  | 0.287234  | 1.091602  |
| 41 | 1  | 0 | 1.805743  | -1.367022 | 0.542514  |
| 42 | 6  | 0 | 3.574035  | -0.396714 | -0.208930 |
| 43 | 6  | 0 | 4.404604  | 0.715737  | 0.003913  |
| 44 | 6  | 0 | 4.127261  | -1.546600 | -0.795614 |
| 45 | 6  | 0 | 5.742668  | 0.692259  | -0.390437 |
| 46 | 1  | 0 | 4.012859  | 1.595075  | 0.510759  |
| 47 | 6  | 0 | 5.464823  | -1.571608 | -1.191646 |
| 48 | 1  | 0 | 3.521325  | -2.442156 | -0.916490 |
| 49 | 6  | 0 | 6.272186  | -0.449151 | -0.996063 |
| 50 | 1  | 0 | 6.374855  | 1.556241  | -0.211720 |
| 51 | 1  | 0 | 5.880181  | -2.469854 | -1.637276 |

|    |   |   |           |           |           |
|----|---|---|-----------|-----------|-----------|
| 52 | 1 | 0 | 7.314599  | -0.470631 | -1.297195 |
| 53 | 6 | 0 | 0.822049  | 2.420676  | -0.095926 |
| 54 | 6 | 0 | 1.370451  | 3.655004  | 0.240497  |
| 55 | 6 | 0 | 0.782434  | 4.405921  | 1.259473  |
| 56 | 1 | 0 | 2.246044  | 4.018917  | -0.286771 |
| 57 | 6 | 0 | -0.821024 | 2.647302  | 1.542094  |
| 58 | 6 | 0 | -0.326455 | 3.887401  | 1.929330  |
| 59 | 1 | 0 | 1.192193  | 5.372249  | 1.535421  |
| 60 | 1 | 0 | -1.667050 | 2.198068  | 2.050923  |
| 61 | 1 | 0 | -0.800151 | 4.427777  | 2.741203  |
| 62 | 7 | 0 | -0.275024 | 1.932000  | 0.538125  |

-----  
**1'(square pyramidal) (doublet) E(B3LYP/ SDD-6-31G(d,p))= -1465.57346714 hartree**  
 -----

| Center<br>Number | Atomic<br>Number | Atomic<br>Type | Coordinates (Angstroms) |           |           |
|------------------|------------------|----------------|-------------------------|-----------|-----------|
|                  |                  |                | X                       | Y         | Z         |
| 1                | 7                | 0              | 0.811614                | -0.744582 | 1.646117  |
| 2                | 6                | 0              | 1.979095                | -0.019948 | 2.197011  |
| 3                | 1                | 0              | 1.676912                | 1.014522  | 2.397194  |
| 4                | 1                | 0              | 2.328374                | -0.445186 | 3.147660  |
| 5                | 6                | 0              | 1.075178                | -2.199473 | 1.515606  |
| 6                | 1                | 0              | 2.144730                | -2.381256 | 1.666876  |
| 7                | 1                | 0              | 0.559273                | -2.768312 | 2.297491  |
| 8                | 6                | 0              | -0.506130               | -0.439116 | 2.269444  |
| 9                | 1                | 0              | -1.102523               | -1.353659 | 2.249060  |
| 10               | 1                | 0              | -0.397268               | -0.161354 | 3.325126  |
| 11               | 27               | 0              | 0.734646                | 0.117537  | -0.322625 |
| 12               | 6                | 0              | 3.095151                | -0.043149 | 1.164489  |
| 13               | 6                | 0              | 4.444119                | -0.088798 | 1.506675  |
| 14               | 6                | 0              | 3.627662                | -0.070504 | -1.111392 |
| 15               | 6                | 0              | 5.406136                | -0.115389 | 0.494584  |
| 16               | 1                | 0              | 4.736304                | -0.109685 | 2.551610  |
| 17               | 6                | 0              | 4.991060                | -0.112672 | -0.837268 |
| 18               | 1                | 0              | 3.257143                | -0.066660 | -2.131391 |
| 19               | 1                | 0              | 6.461905                | -0.149786 | 0.743883  |
| 20               | 1                | 0              | 5.704609                | -0.146045 | -1.652919 |
| 21               | 6                | 0              | 0.704579                | -2.726240 | 0.141884  |
| 22               | 6                | 0              | 0.564922                | -4.092480 | -0.104431 |
| 23               | 6                | 0              | 0.313600                | -4.528965 | -1.403728 |
| 24               | 1                | 0              | 0.658978                | -4.801890 | 0.711779  |
| 25               | 6                | 0              | 0.339159                | -2.239668 | -2.104469 |
| 26               | 6                | 0              | 0.205100                | -3.583831 | -2.426461 |
| 27               | 1                | 0              | 0.204434                | -5.587747 | -1.615709 |

|    |   |   |           |           |           |
|----|---|---|-----------|-----------|-----------|
| 28 | 1 | 0 | 0.249047  | -1.470468 | -2.865854 |
| 29 | 1 | 0 | 0.013767  | -3.878309 | -3.452199 |
| 30 | 7 | 0 | 2.699749  | -0.026213 | -0.135665 |
| 31 | 7 | 0 | 0.579489  | -1.815446 | -0.845318 |
| 32 | 6 | 0 | -1.236166 | 0.677739  | 1.521497  |
| 33 | 1 | 0 | -2.262851 | 0.768116  | 1.892487  |
| 34 | 1 | 0 | -0.739935 | 1.633638  | 1.702124  |
| 35 | 7 | 0 | -1.248315 | 0.448525  | 0.030984  |
| 36 | 6 | 0 | -1.597564 | 1.724552  | -0.657192 |
| 37 | 1 | 0 | -1.804681 | 1.490479  | -1.707690 |
| 38 | 1 | 0 | -2.512975 | 2.161467  | -0.244761 |
| 39 | 6 | 0 | -2.239236 | -0.638017 | -0.369370 |
| 40 | 1 | 0 | -2.092265 | -0.788703 | -1.441623 |
| 41 | 1 | 0 | -1.917805 | -1.552094 | 0.131069  |
| 42 | 6 | 0 | -3.695780 | -0.358407 | -0.071785 |
| 43 | 6 | 0 | -4.512676 | 0.270367  | -1.024879 |
| 44 | 6 | 0 | -4.271005 | -0.768138 | 1.141946  |
| 45 | 6 | 0 | -5.860820 | 0.511041  | -0.759429 |
| 46 | 1 | 0 | -4.103346 | 0.551188  | -1.992646 |
| 47 | 6 | 0 | -5.618915 | -0.527436 | 1.410048  |
| 48 | 1 | 0 | -3.672483 | -1.305609 | 1.874510  |
| 49 | 6 | 0 | -6.414088 | 0.118478  | 0.461313  |
| 50 | 1 | 0 | -6.481924 | 0.989904  | -1.509733 |
| 51 | 1 | 0 | -6.050764 | -0.856484 | 2.349844  |
| 52 | 1 | 0 | -7.464703 | 0.298925  | 0.664965  |
| 53 | 6 | 0 | -0.446192 | 2.690543  | -0.586017 |
| 54 | 6 | 0 | -0.615310 | 4.065686  | -0.725721 |
| 55 | 6 | 0 | 0.505203  | 4.894280  | -0.705099 |
| 56 | 1 | 0 | -1.611525 | 4.476820  | -0.851113 |
| 57 | 6 | 0 | 1.858980  | 2.941148  | -0.390230 |
| 58 | 6 | 0 | 1.765227  | 4.318747  | -0.534135 |
| 59 | 1 | 0 | 0.397022  | 5.968508  | -0.815601 |
| 60 | 1 | 0 | 2.819711  | 2.463034  | -0.251499 |
| 61 | 1 | 0 | 2.664248  | 4.924143  | -0.508431 |
| 62 | 7 | 0 | 0.776807  | 2.130131  | -0.414830 |

-----  
**1'(square pyramidal) (q) E(B3LYP/ SDD-6-31G(d,p))= -1465.582229 hartree**  
 -----

| Center<br>Number | Atomic<br>Number | Atomic<br>Type | Coordinates (Angstroms) |           |          |
|------------------|------------------|----------------|-------------------------|-----------|----------|
|                  |                  |                | X                       | Y         | Z        |
| 1                | 7                | 0              | 0.805607                | -0.916510 | 1.491459 |
| 2                | 6                | 0              | 1.900442                | -0.258910 | 2.250614 |
| 3                | 1                | 0              | 1.554760                | 0.738741  | 2.544822 |

|    |    |   |           |           |           |
|----|----|---|-----------|-----------|-----------|
| 4  | 1  | 0 | 2.131748  | -0.803696 | 3.175223  |
| 5  | 6  | 0 | 1.105287  | -2.354486 | 1.248375  |
| 6  | 1  | 0 | 2.189646  | -2.494598 | 1.312871  |
| 7  | 1  | 0 | 0.665439  | -2.987083 | 2.028178  |
| 8  | 6  | 0 | -0.530503 | -0.706942 | 2.124841  |
| 9  | 1  | 0 | -1.141275 | -1.586365 | 1.913563  |
| 10 | 1  | 0 | -0.439015 | -0.643996 | 3.216176  |
| 11 | 27 | 0 | 0.791196  | 0.088104  | -0.436803 |
| 12 | 6  | 0 | 3.135600  | -0.135591 | 1.381157  |
| 13 | 6  | 0 | 4.426972  | -0.217220 | 1.898786  |
| 14 | 6  | 0 | 3.960494  | 0.150909  | -0.773689 |
| 15 | 6  | 0 | 5.514372  | -0.099898 | 1.031802  |
| 16 | 1  | 0 | 4.577955  | -0.376350 | 2.961653  |
| 17 | 6  | 0 | 5.277488  | 0.078238  | -0.331844 |
| 18 | 1  | 0 | 3.733570  | 0.283541  | -1.827912 |
| 19 | 1  | 0 | 6.528656  | -0.160323 | 1.413342  |
| 20 | 1  | 0 | 6.092825  | 0.155657  | -1.042414 |
| 21 | 6  | 0 | 0.666682  | -2.817199 | -0.126944 |
| 22 | 6  | 0 | 0.419965  | -4.161850 | -0.398734 |
| 23 | 6  | 0 | 0.125752  | -4.551202 | -1.705746 |
| 24 | 1  | 0 | 0.465152  | -4.894269 | 0.400898  |
| 25 | 6  | 0 | 0.318657  | -2.258510 | -2.363132 |
| 26 | 6  | 0 | 0.080419  | -3.582347 | -2.709785 |
| 27 | 1  | 0 | -0.065508 | -5.594476 | -1.936193 |
| 28 | 1  | 0 | 0.280885  | -1.470523 | -3.109707 |
| 29 | 1  | 0 | -0.140961 | -3.842354 | -3.738739 |
| 30 | 7  | 0 | 2.907484  | 0.058170  | 0.063007  |
| 31 | 7  | 0 | 0.604934  | -1.878252 | -1.099189 |
| 32 | 6  | 0 | -1.217921 | 0.549555  | 1.589919  |
| 33 | 1  | 0 | -2.211726 | 0.645166  | 2.043533  |
| 34 | 1  | 0 | -0.648630 | 1.442494  | 1.868751  |
| 35 | 7  | 0 | -1.317517 | 0.523702  | 0.100631  |
| 36 | 6  | 0 | -1.656675 | 1.869375  | -0.422930 |
| 37 | 1  | 0 | -2.065303 | 1.741538  | -1.431432 |
| 38 | 1  | 0 | -2.447276 | 2.344933  | 0.168290  |
| 39 | 6  | 0 | -2.327306 | -0.497583 | -0.397753 |
| 40 | 1  | 0 | -2.234498 | -0.497896 | -1.487699 |
| 41 | 1  | 0 | -1.988225 | -1.475448 | -0.052278 |
| 42 | 6  | 0 | -3.768164 | -0.266259 | 0.004569  |
| 43 | 6  | 0 | -4.631841 | 0.468138  | -0.822908 |
| 44 | 6  | 0 | -4.279676 | -0.811794 | 1.193254  |
| 45 | 6  | 0 | -5.962158 | 0.676938  | -0.458767 |
| 46 | 1  | 0 | -4.274933 | 0.857721  | -1.773441 |
| 47 | 6  | 0 | -5.609428 | -0.602921 | 1.560623  |

|    |   |   |           |           |           |
|----|---|---|-----------|-----------|-----------|
| 48 | 1 | 0 | -3.647212 | -1.429771 | 1.827103  |
| 49 | 6 | 0 | -6.451091 | 0.147629  | 0.737363  |
| 50 | 1 | 0 | -6.619624 | 1.238895  | -1.114533 |
| 51 | 1 | 0 | -5.991342 | -1.036892 | 2.479264  |
| 52 | 1 | 0 | -7.487745 | 0.304174  | 1.017853  |
| 53 | 6 | 0 | -0.453734 | 2.777145  | -0.529736 |
| 54 | 6 | 0 | -0.603733 | 4.163573  | -0.542683 |
| 55 | 6 | 0 | 0.512104  | 4.970269  | -0.754635 |
| 56 | 1 | 0 | -1.586230 | 4.600194  | -0.395705 |
| 57 | 6 | 0 | 1.835338  | 2.980321  | -0.886442 |
| 58 | 6 | 0 | 1.756861  | 4.364651  | -0.936268 |
| 59 | 1 | 0 | 0.413535  | 6.050997  | -0.774521 |
| 60 | 1 | 0 | 2.786494  | 2.475557  | -0.998238 |
| 61 | 1 | 0 | 2.652746  | 4.951334  | -1.105225 |
| 62 | 7 | 0 | 0.755004  | 2.190052  | -0.691004 |

-----  
**1'**<sub>pt-A</sub> (quartet) E(B3LYP/ SDD-6-31G(d,p))= -1465.74302710 hartree

| Center<br>Number | Atomic<br>Number | Atomic<br>Type | Coordinates (Angstroms) |           |           |
|------------------|------------------|----------------|-------------------------|-----------|-----------|
|                  |                  |                | X                       | Y         | Z         |
| 1                | 7                | 0              | -1.897783               | -1.084239 | -1.302355 |
| 2                | 6                | 0              | -2.752269               | -0.197845 | -2.141021 |
| 3                | 1                | 0              | -2.133761               | 0.249439  | -2.926286 |
| 4                | 1                | 0              | -3.531801               | -0.770562 | -2.656385 |
| 5                | 6                | 0              | -2.703039               | -2.146725 | -0.635505 |
| 6                | 1                | 0              | -3.728098               | -1.773922 | -0.528569 |
| 7                | 1                | 0              | -2.759895               | -3.047147 | -1.258486 |
| 8                | 6                | 0              | -0.714115               | -1.623308 | -2.028342 |
| 9                | 1                | 0              | -0.353988               | -2.495690 | -1.477075 |
| 10               | 1                | 0              | -0.985155               | -1.973846 | -3.032604 |
| 11               | 27               | 0              | -1.085585               | 0.118490  | 0.248275  |
| 12               | 6                | 0              | -3.364763               | 0.912115  | -1.308274 |
| 13               | 6                | 0              | -4.561490               | 1.529111  | -1.659766 |
| 14               | 6                | 0              | -3.142667               | 2.318488  | 0.552342  |
| 15               | 6                | 0              | -5.046798               | 2.578643  | -0.875857 |
| 16               | 1                | 0              | -5.109985               | 1.191539  | -2.533486 |
| 17               | 6                | 0              | -4.324770               | 2.979233  | 0.251657  |
| 18               | 1                | 0              | -2.562956               | 2.582773  | 1.431742  |
| 19               | 1                | 0              | -5.980215               | 3.068683  | -1.135660 |
| 20               | 1                | 0              | -4.676436               | 3.780202  | 0.892593  |
| 21               | 6                | 0              | -2.185228               | -2.477496 | 0.750058  |
| 22               | 6                | 0              | -2.487622               | -3.683539 | 1.376263  |

|    |   |   |           |           |           |
|----|---|---|-----------|-----------|-----------|
| 23 | 6 | 0 | -2.089667 | -3.885470 | 2.699274  |
| 24 | 1 | 0 | -3.038026 | -4.450500 | 0.840500  |
| 25 | 6 | 0 | -1.104199 | -1.703490 | 2.677810  |
| 26 | 6 | 0 | -1.390751 | -2.873861 | 3.364439  |
| 27 | 1 | 0 | -2.324129 | -4.817443 | 3.204526  |
| 28 | 1 | 0 | -0.558597 | -0.894962 | 3.154942  |
| 29 | 1 | 0 | -1.072443 | -2.989903 | 4.394539  |
| 30 | 7 | 0 | -2.660787 | 1.308568  | -0.214048 |
| 31 | 7 | 0 | -1.488681 | -1.504567 | 1.392740  |
| 32 | 6 | 0 | 0.371241  | -0.555809 | -2.149472 |
| 33 | 1 | 0 | 1.232947  | -0.952137 | -2.691009 |
| 34 | 1 | 0 | -0.005357 | 0.282393  | -2.741679 |
| 35 | 7 | 0 | 0.800738  | 0.011176  | -0.810926 |
| 36 | 6 | 0 | 1.557942  | 1.277941  | -1.127254 |
| 37 | 1 | 0 | 2.448949  | 1.010890  | -1.707456 |
| 38 | 1 | 0 | 0.918461  | 1.874949  | -1.781140 |
| 39 | 6 | 0 | 1.650311  | -0.991472 | -0.011347 |
| 40 | 1 | 0 | 1.636714  | -0.642198 | 1.026078  |
| 41 | 1 | 0 | 1.090771  | -1.929043 | -0.029435 |
| 42 | 6 | 0 | 3.094231  | -1.220751 | -0.423734 |
| 43 | 6 | 0 | 4.116061  | -0.879497 | 0.487519  |
| 44 | 6 | 0 | 3.463456  | -1.855249 | -1.621933 |
| 45 | 6 | 0 | 5.461528  | -1.115150 | 0.187235  |
| 46 | 1 | 0 | 3.852545  | -0.513146 | 1.479245  |
| 47 | 6 | 0 | 4.808665  | -2.077004 | -1.927973 |
| 48 | 1 | 0 | 2.714839  | -2.229845 | -2.312388 |
| 49 | 6 | 0 | 5.811152  | -1.696466 | -1.033684 |
| 50 | 1 | 0 | 6.230213  | -0.875594 | 0.915627  |
| 51 | 1 | 0 | 5.071197  | -2.571049 | -2.857979 |
| 52 | 1 | 0 | 6.853314  | -1.884142 | -1.270643 |
| 53 | 6 | 0 | 1.971523  | 2.190582  | 0.012268  |
| 54 | 6 | 0 | 1.194606  | 3.247441  | 0.474192  |
| 55 | 6 | 0 | 1.711845  | 4.150219  | 1.414707  |
| 56 | 1 | 0 | 0.203164  | 3.399560  | 0.059827  |
| 57 | 6 | 0 | 3.771054  | 2.933497  | 1.407033  |
| 58 | 6 | 0 | 3.016812  | 3.995382  | 1.885504  |
| 59 | 1 | 0 | 1.107093  | 4.985087  | 1.756153  |
| 60 | 1 | 0 | 4.794383  | 2.739408  | 1.709804  |
| 61 | 1 | 0 | 3.452334  | 4.687562  | 2.597876  |
| 62 | 7 | 0 | 3.234759  | 2.082544  | 0.506437  |
| 63 | 1 | 0 | 3.808691  | 1.287916  | 0.193621  |

-----  
**1'**<sub>pt-A</sub> (doublet) E(B3LYP/ SDD-6-31G(d,p))= -1465.71066440 hartree  
 -----

| Center<br>Number | Atomic<br>Number | Atomic<br>Type | Coordinates (Angstroms) |           |           |
|------------------|------------------|----------------|-------------------------|-----------|-----------|
|                  |                  |                | X                       | Y         | Z         |
| 1                | 7                | 0              | -1.807352               | -1.305697 | -1.188767 |
| 2                | 6                | 0              | -2.882381               | -0.757605 | -2.077382 |
| 3                | 1                | 0              | -2.407843               | -0.291100 | -2.948428 |
| 4                | 1                | 0              | -3.528182               | -1.559020 | -2.454976 |
| 5                | 6                | 0              | -2.384054               | -2.238543 | -0.162695 |
| 6                | 1                | 0              | -3.454817               | -2.026698 | -0.081142 |
| 7                | 1                | 0              | -2.292913               | -3.273491 | -0.508297 |
| 8                | 6                | 0              | -0.642374               | -1.897960 | -1.924162 |
| 9                | 1                | 0              | -0.234149               | -2.705917 | -1.314959 |
| 10               | 1                | 0              | -0.965417               | -2.344824 | -2.871276 |
| 11               | 27               | 0              | -1.130516               | 0.277258  | -0.183994 |
| 12               | 6                | 0              | -3.669657               | 0.270245  | -1.290751 |
| 13               | 6                | 0              | -4.986426               | 0.615517  | -1.570508 |
| 14               | 6                | 0              | -3.603629               | 1.775882  | 0.507347  |
| 15               | 6                | 0              | -5.614055               | 1.588059  | -0.786480 |
| 16               | 1                | 0              | -5.516353               | 0.132243  | -2.385193 |
| 17               | 6                | 0              | -4.913056               | 2.173979  | 0.270731  |
| 18               | 1                | 0              | -3.027683               | 2.184802  | 1.331735  |
| 19               | 1                | 0              | -6.641465               | 1.873605  | -0.990593 |
| 20               | 1                | 0              | -5.374363               | 2.919468  | 0.909058  |
| 21               | 6                | 0              | -1.769575               | -2.071011 | 1.218198  |
| 22               | 6                | 0              | -1.878541               | -3.080234 | 2.173845  |
| 23               | 6                | 0              | -1.425854               | -2.839105 | 3.471635  |
| 24               | 1                | 0              | -2.324626               | -4.034540 | 1.911028  |
| 25               | 6                | 0              | -0.770157               | -0.645025 | 2.765678  |
| 26               | 6                | 0              | -0.868985               | -1.594615 | 3.775260  |
| 27               | 1                | 0              | -1.510517               | -3.608046 | 4.233216  |
| 28               | 1                | 0              | -0.335365               | 0.331138  | 2.958249  |
| 29               | 1                | 0              | -0.515157               | -1.363045 | 4.773906  |
| 30               | 7                | 0              | -2.986313               | 0.854275  | -0.266138 |
| 31               | 7                | 0              | -1.207549               | -0.876171 | 1.509173  |
| 32               | 6                | 0              | 0.397210                | -0.816346 | -2.186025 |
| 33               | 1                | 0              | 1.272277                | -1.230289 | -2.692135 |
| 34               | 1                | 0              | -0.024052               | -0.063775 | -2.860980 |
| 35               | 7                | 0              | 0.794418                | -0.094074 | -0.909263 |
| 36               | 6                | 0              | 1.548960                | 1.138040  | -1.362388 |
| 37               | 1                | 0              | 2.457549                | 0.810937  | -1.881350 |
| 38               | 1                | 0              | 0.925108                | 1.642451  | -2.104465 |
| 39               | 6                | 0              | 1.638724                | -0.970460 | 0.022631  |
| 40               | 1                | 0              | 1.582678                | -0.495357 | 1.004602  |
| 41               | 1                | 0              | 1.098482                | -1.914009 | 0.115955  |

|    |   |   |          |           |           |
|----|---|---|----------|-----------|-----------|
| 42 | 6 | 0 | 3.097623 | -1.219942 | -0.321868 |
| 43 | 6 | 0 | 4.079167 | -0.811376 | 0.606663  |
| 44 | 6 | 0 | 3.520971 | -1.934498 | -1.455511 |
| 45 | 6 | 0 | 5.436858 | -1.066075 | 0.385355  |
| 46 | 1 | 0 | 3.771848 | -0.375036 | 1.556809  |
| 47 | 6 | 0 | 4.878301 | -2.174647 | -1.684173 |
| 48 | 1 | 0 | 2.805548 | -2.357835 | -2.152549 |
| 49 | 6 | 0 | 5.840239 | -1.732045 | -0.773742 |
| 50 | 1 | 0 | 6.172077 | -0.771895 | 1.128100  |
| 51 | 1 | 0 | 5.182067 | -2.731184 | -2.565060 |
| 52 | 1 | 0 | 6.891633 | -1.934685 | -0.949708 |
| 53 | 6 | 0 | 1.924586 | 2.189303  | -0.334778 |
| 54 | 6 | 0 | 1.164826 | 3.327888  | -0.088977 |
| 55 | 6 | 0 | 1.652581 | 4.339388  | 0.752031  |
| 56 | 1 | 0 | 0.215276 | 3.457870  | -0.598818 |
| 57 | 6 | 0 | 3.650819 | 3.064534  | 1.073788  |
| 58 | 6 | 0 | 2.912092 | 4.209265  | 1.339238  |
| 59 | 1 | 0 | 1.061768 | 5.234374  | 0.923380  |
| 60 | 1 | 0 | 4.641265 | 2.882744  | 1.477080  |
| 61 | 1 | 0 | 3.326498 | 4.981818  | 1.977787  |
| 62 | 7 | 0 | 3.143840 | 2.110880  | 0.264196  |
| 63 | 1 | 0 | 3.708184 | 1.263176  | 0.104703  |

-----  
**1'**<sub>pt-B</sub> (quartet) E(B3LYP/ SDD-6-31G(d,p))= -1465.74091980 hartree

| Center<br>Number | Atomic<br>Number | Atomic<br>Type | Coordinates (Angstroms) |           |           |
|------------------|------------------|----------------|-------------------------|-----------|-----------|
|                  |                  |                | X                       | Y         | Z         |
| 1                | 7                | 0              | -1.367313               | -0.982006 | -0.951406 |
| 2                | 6                | 0              | -2.203131               | -0.439763 | -2.084371 |
| 3                | 1                | 0              | -1.597387               | 0.299812  | -2.615482 |
| 4                | 1                | 0              | -2.393151               | -1.254225 | -2.794670 |
| 5                | 6                | 0              | -2.111579               | -2.046375 | -0.204787 |
| 6                | 1                | 0              | -3.127178               | -1.680180 | -0.024689 |
| 7                | 1                | 0              | -2.197019               | -2.954862 | -0.814598 |
| 8                | 6                | 0              | -0.098870               | -1.567469 | -1.562055 |
| 9                | 1                | 0              | 0.281481                | -2.309808 | -0.855330 |
| 10               | 1                | 0              | -0.345759               | -2.105298 | -2.485486 |
| 11               | 27               | 0              | -0.320648               | 0.159519  | 0.585127  |
| 12               | 6                | 0              | -3.553498               | 0.171220  | -1.756024 |
| 13               | 6                | 0              | -4.752210               | -0.527561 | -1.842652 |
| 14               | 6                | 0              | -4.790652               | 2.176111  | -1.284867 |
| 15               | 6                | 0              | -5.975213               | 0.127602  | -1.637690 |



|    |   |   |           |           |           |
|----|---|---|-----------|-----------|-----------|
| 16 | 1 | 0 | -4.737469 | -1.581117 | -2.100746 |
| 17 | 6 | 0 | -5.995549 | 1.494774  | -1.351296 |
| 18 | 1 | 0 | -4.713008 | 3.241345  | -1.097065 |
| 19 | 1 | 0 | -6.905497 | -0.427169 | -1.719677 |
| 20 | 1 | 0 | -6.925643 | 2.032699  | -1.202228 |
| 21 | 6 | 0 | -1.498063 | -2.381126 | 1.144200  |
| 22 | 6 | 0 | -1.736243 | -3.607981 | 1.756800  |
| 23 | 6 | 0 | -1.242278 | -3.835122 | 3.043836  |
| 24 | 1 | 0 | -2.304115 | -4.375629 | 1.240594  |
| 25 | 6 | 0 | -0.291574 | -1.637324 | 3.007700  |
| 26 | 6 | 0 | -0.513002 | -2.829512 | 3.683016  |
| 27 | 1 | 0 | -1.422135 | -4.784965 | 3.538079  |
| 28 | 1 | 0 | 0.285383  | -0.835082 | 3.456503  |
| 29 | 1 | 0 | -0.114073 | -2.967801 | 4.681944  |
| 30 | 7 | 0 | -3.629874 | 1.505622  | -1.481482 |
| 31 | 7 | 0 | -0.777081 | -1.412197 | 1.762793  |
| 32 | 6 | 0 | 0.974258  | -0.509265 | -1.840092 |
| 33 | 1 | 0 | 1.835023  | -0.981467 | -2.324524 |
| 34 | 1 | 0 | 0.604191  | 0.245101  | -2.539399 |
| 35 | 7 | 0 | 1.386775  | 0.172214  | -0.571858 |
| 36 | 6 | 0 | 1.705453  | 1.624266  | -0.745743 |
| 37 | 1 | 0 | 2.768291  | 1.760712  | -0.965582 |
| 38 | 1 | 0 | 1.158022  | 1.999313  | -1.618078 |
| 39 | 6 | 0 | 2.530240  | -0.568388 | 0.154987  |
| 40 | 1 | 0 | 2.648942  | -0.049639 | 1.111508  |
| 41 | 1 | 0 | 2.150297  | -1.571636 | 0.368882  |
| 42 | 6 | 0 | 3.841128  | -0.639781 | -0.582135 |
| 43 | 6 | 0 | 4.822785  | 0.348347  | -0.391083 |
| 44 | 6 | 0 | 4.123977  | -1.720335 | -1.435915 |
| 45 | 6 | 0 | 6.040760  | 0.277916  | -1.067505 |
| 46 | 1 | 0 | 4.656144  | 1.153028  | 0.322211  |
| 47 | 6 | 0 | 5.341635  | -1.789698 | -2.112906 |
| 48 | 1 | 0 | 3.411145  | -2.535772 | -1.542472 |
| 49 | 6 | 0 | 6.297159  | -0.785954 | -1.935909 |
| 50 | 1 | 0 | 6.796520  | 1.038970  | -0.902333 |
| 51 | 1 | 0 | 5.553519  | -2.634276 | -2.760526 |
| 52 | 1 | 0 | 7.248603  | -0.845580 | -2.454421 |
| 53 | 6 | 0 | 1.293470  | 2.442487  | 0.466909  |
| 54 | 6 | 0 | 1.965124  | 3.604561  | 0.834264  |
| 55 | 6 | 0 | 1.492655  | 4.358466  | 1.911443  |
| 56 | 1 | 0 | 2.847701  | 3.916524  | 0.285097  |
| 57 | 6 | 0 | -0.266276 | 2.756983  | 2.194522  |
| 58 | 6 | 0 | 0.356349  | 3.928080  | 2.602315  |
| 59 | 1 | 0 | 2.008598  | 5.265478  | 2.211634  |

|    |   |   |           |          |           |
|----|---|---|-----------|----------|-----------|
| 60 | 1 | 0 | -1.141728 | 2.375003 | 2.710425  |
| 61 | 1 | 0 | -0.034995 | 4.483152 | 3.447801  |
| 62 | 7 | 0 | 0.186656  | 2.026941 | 1.145863  |
| 63 | 1 | 0 | -2.772464 | 2.051393 | -1.472937 |

-----

**1'**<sub>pt-B</sub> (doublet) E(B3LYP/ SDD-6-31G(d,p))= -1465.72273867 hartree

| Center<br>Number | Atomic<br>Number | Atomic<br>Type | Coordinates (Angstroms) |           |           |
|------------------|------------------|----------------|-------------------------|-----------|-----------|
|                  |                  |                | X                       | Y         | Z         |
| 1                | 7                | 0              | -1.285712               | -1.243632 | -0.686659 |
| 2                | 6                | 0              | -2.195997               | -0.997540 | -1.876912 |
| 3                | 1                | 0              | -1.639661               | -0.387755 | -2.594350 |
| 4                | 1                | 0              | -2.375703               | -1.962493 | -2.365089 |
| 5                | 6                | 0              | -1.983077               | -2.059708 | 0.365439  |
| 6                | 1                | 0              | -3.043185               | -1.791533 | 0.359457  |
| 7                | 1                | 0              | -1.920756               | -3.127942 | 0.129375  |
| 8                | 6                | 0              | -0.065488               | -1.983372 | -1.215602 |
| 9                | 1                | 0              | 0.375339                | -2.510671 | -0.367393 |
| 10               | 1                | 0              | -0.366789               | -2.741026 | -1.948173 |
| 11               | 27               | 0              | -0.385428               | 0.358295  | 0.227814  |
| 12               | 6                | 0              | -3.561732               | -0.374482 | -1.648627 |
| 13               | 6                | 0              | -4.728760               | -1.120508 | -1.527083 |
| 14               | 6                | 0              | -4.880492               | 1.634263  | -1.616144 |
| 15               | 6                | 0              | -5.975969               | -0.484902 | -1.436422 |
| 16               | 1                | 0              | -4.672161               | -2.203949 | -1.532632 |
| 17               | 6                | 0              | -6.053315               | 0.909108  | -1.475689 |
| 18               | 1                | 0              | -4.848472               | 2.716037  | -1.686262 |
| 19               | 1                | 0              | -6.880572               | -1.080528 | -1.353190 |
| 20               | 1                | 0              | -7.003408               | 1.429833  | -1.421444 |
| 21               | 6                | 0              | -1.450503               | -1.769408 | 1.750906  |
| 22               | 6                | 0              | -1.591727               | -2.675221 | 2.797207  |
| 23               | 6                | 0              | -1.174805               | -2.304085 | 4.078131  |
| 24               | 1                | 0              | -2.023788               | -3.654793 | 2.618456  |
| 25               | 6                | 0              | -0.484700               | -0.192990 | 3.178352  |
| 26               | 6                | 0              | -0.616479               | -1.038683 | 4.271775  |
| 27               | 1                | 0              | -1.279248               | -2.994882 | 4.909186  |
| 28               | 1                | 0              | -0.026829               | 0.783979  | 3.279179  |
| 29               | 1                | 0              | -0.276048               | -0.714771 | 5.249184  |
| 30               | 7                | 0              | -3.694767               | 0.983261  | -1.693837 |
| 31               | 7                | 0              | -0.899097               | -0.542280 | 1.937933  |
| 32               | 6                | 0              | 0.943794                | -1.008531 | -1.818516 |
| 33               | 1                | 0              | 1.837519                | -1.543494 | -2.155234 |

|    |   |   |           |           |           |
|----|---|---|-----------|-----------|-----------|
| 34 | 1 | 0 | 0.534910  | -0.492698 | -2.691959 |
| 35 | 7 | 0 | 1.288997  | 0.009493  | -0.779505 |
| 36 | 6 | 0 | 1.722691  | 1.334269  | -1.318426 |
| 37 | 1 | 0 | 2.780697  | 1.315223  | -1.597521 |
| 38 | 1 | 0 | 1.154328  | 1.546921  | -2.231784 |
| 39 | 6 | 0 | 2.345055  | -0.530037 | 0.226268  |
| 40 | 1 | 0 | 2.440960  | 0.245180  | 0.988861  |
| 41 | 1 | 0 | 1.894680  | -1.404517 | 0.700565  |
| 42 | 6 | 0 | 3.684191  | -0.870904 | -0.371214 |
| 43 | 6 | 0 | 4.710011  | 0.090274  | -0.413042 |
| 44 | 6 | 0 | 3.950562  | -2.168705 | -0.842463 |
| 45 | 6 | 0 | 5.959342  | -0.229671 | -0.943910 |
| 46 | 1 | 0 | 4.548741  | 1.079636  | 0.009832  |
| 47 | 6 | 0 | 5.199896  | -2.487777 | -1.373878 |
| 48 | 1 | 0 | 3.196476  | -2.948799 | -0.757777 |
| 49 | 6 | 0 | 6.202263  | -1.515945 | -1.432638 |
| 50 | 1 | 0 | 6.748231  | 0.515350  | -0.958734 |
| 51 | 1 | 0 | 5.398407  | -3.495722 | -1.723409 |
| 52 | 1 | 0 | 7.177269  | -1.766766 | -1.837787 |
| 53 | 6 | 0 | 1.433906  | 2.394078  | -0.276052 |
| 54 | 6 | 0 | 2.103119  | 3.612343  | -0.219536 |
| 55 | 6 | 0 | 1.728643  | 4.552176  | 0.743654  |
| 56 | 1 | 0 | 2.905429  | 3.823257  | -0.919352 |
| 57 | 6 | 0 | 0.068556  | 3.010765  | 1.527880  |
| 58 | 6 | 0 | 0.691109  | 4.247356  | 1.629060  |
| 59 | 1 | 0 | 2.241520  | 5.507186  | 0.804471  |
| 60 | 1 | 0 | -0.738881 | 2.730486  | 2.196810  |
| 61 | 1 | 0 | 0.372608  | 4.951796  | 2.389618  |
| 62 | 7 | 0 | 0.430671  | 2.095940  | 0.597821  |
| 63 | 1 | 0 | -2.866253 | 1.551042  | -1.849272 |

-----

$\mathbf{1}'_{\text{pt-c}}$  (quartet) E(B3LYP/ SDD-6-31G(d,p))= -1465.73211305 hartree

| Center<br>Number | Atomic<br>Number | Atomic<br>Type | Coordinates (Angstroms) |          |           |
|------------------|------------------|----------------|-------------------------|----------|-----------|
|                  |                  |                | X                       | Y        | Z         |
| 1                | 7                | 0              | 1.252333                | 1.222478 | -1.081885 |
| 2                | 6                | 0              | 2.233601                | 0.653972 | -2.076998 |
| 3                | 1                | 0              | 1.668572                | 0.065684 | -2.806092 |
| 4                | 1                | 0              | 2.721293                | 1.456365 | -2.642179 |
| 5                | 6                | 0              | 1.884716                | 2.492630 | -0.566930 |
| 6                | 1                | 0              | 2.892732                | 2.227258 | -0.231955 |
| 7                | 1                | 0              | 2.008617                | 3.184164 | -1.410655 |

|    |    |   |           |           |           |
|----|----|---|-----------|-----------|-----------|
| 8  | 6  | 0 | -0.062480 | 1.487684  | -1.763454 |
| 9  | 1  | 0 | -0.630744 | 2.169947  | -1.130505 |
| 10 | 1  | 0 | 0.097080  | 1.990429  | -2.726104 |
| 11 | 27 | 0 | 0.858377  | -0.667473 | 0.145545  |
| 12 | 6  | 0 | 3.255069  | -0.252341 | -1.429610 |
| 13 | 6  | 0 | 4.565702  | -0.357557 | -1.881105 |
| 14 | 6  | 0 | 3.588350  | -1.985454 | 0.104275  |
| 15 | 6  | 0 | 5.404925  | -1.320890 | -1.311185 |
| 16 | 1  | 0 | 4.924455  | 0.288596  | -2.675975 |
| 17 | 6  | 0 | 4.906262  | -2.150648 | -0.305381 |
| 18 | 1  | 0 | 3.156515  | -2.613090 | 0.876443  |
| 19 | 1  | 0 | 6.430198  | -1.423872 | -1.653372 |
| 20 | 1  | 0 | 5.522984  | -2.915737 | 0.153364  |
| 21 | 6  | 0 | 1.190049  | 3.272275  | 0.534570  |
| 22 | 6  | 0 | 0.226295  | 4.250343  | 0.314100  |
| 23 | 6  | 0 | -0.269913 | 5.014396  | 1.380108  |
| 24 | 1  | 0 | -0.111025 | 4.449093  | -0.697285 |
| 25 | 6  | 0 | 1.186820  | 3.841198  | 2.871223  |
| 26 | 6  | 0 | 0.210294  | 4.804571  | 2.675264  |
| 27 | 1  | 0 | -1.011437 | 5.785521  | 1.191929  |
| 28 | 1  | 0 | 1.643659  | 3.634841  | 3.833043  |
| 29 | 1  | 0 | -0.141528 | 5.391921  | 3.516605  |
| 30 | 7  | 0 | 2.777857  | -1.049403 | -0.441224 |
| 31 | 7  | 0 | 1.632383  | 3.116225  | 1.816765  |
| 32 | 6  | 0 | -0.873788 | 0.204530  | -1.983835 |
| 33 | 1  | 0 | -1.848636 | 0.465391  | -2.409767 |
| 34 | 1  | 0 | -0.381958 | -0.455746 | -2.703725 |
| 35 | 7  | 0 | -1.028442 | -0.542072 | -0.703803 |
| 36 | 6  | 0 | -1.365392 | -1.986507 | -0.885840 |
| 37 | 1  | 0 | -2.428146 | -2.116106 | -1.112529 |
| 38 | 1  | 0 | -0.803749 | -2.367120 | -1.747727 |
| 39 | 6  | 0 | -2.029293 | 0.130908  | 0.253398  |
| 40 | 1  | 0 | -1.978825 | -0.436295 | 1.186141  |
| 41 | 1  | 0 | -1.634895 | 1.130810  | 0.457337  |
| 42 | 6  | 0 | -3.452746 | 0.207653  | -0.239781 |
| 43 | 6  | 0 | -4.371544 | -0.801555 | 0.094727  |
| 44 | 6  | 0 | -3.895309 | 1.298914  | -1.006900 |
| 45 | 6  | 0 | -5.691134 | -0.736884 | -0.353584 |
| 46 | 1  | 0 | -4.065651 | -1.624849 | 0.736481  |
| 47 | 6  | 0 | -5.213925 | 1.363338  | -1.456741 |
| 48 | 1  | 0 | -3.218964 | 2.121715  | -1.231684 |
| 49 | 6  | 0 | -6.111048 | 0.341121  | -1.136304 |
| 50 | 1  | 0 | -6.394540 | -1.516775 | -0.080385 |
| 51 | 1  | 0 | -5.546498 | 2.213590  | -2.043404 |

|    |   |   |           |           |           |
|----|---|---|-----------|-----------|-----------|
| 52 | 1 | 0 | -7.138874 | 0.394188  | -1.480396 |
| 53 | 6 | 0 | -0.983678 | -2.773071 | 0.360061  |
| 54 | 6 | 0 | -1.637886 | -3.946858 | 0.721490  |
| 55 | 6 | 0 | -1.218728 | -4.641367 | 1.858646  |
| 56 | 1 | 0 | -2.464593 | -4.313173 | 0.121187  |
| 57 | 6 | 0 | 0.450250  | -2.958652 | 2.205420  |
| 58 | 6 | 0 | -0.160390 | -4.134473 | 2.617977  |
| 59 | 1 | 0 | -1.717548 | -5.559555 | 2.153460  |
| 60 | 1 | 0 | 1.270501  | -2.525361 | 2.769426  |
| 61 | 1 | 0 | 0.183615  | -4.637898 | 3.514787  |
| 62 | 7 | 0 | 0.056709  | -2.291809 | 1.094454  |
| 63 | 1 | 0 | 2.394870  | 2.466246  | 1.992007  |

-----  
 $1'_{pt-c}$  (doublet) E(B3LYP/ SDD-6-31G(d,p))= -1465.73258932 hartree  
 -----

| Center<br>Number | Atomic<br>Number | Atomic<br>Type | Coordinates (Angstroms) |           |           |
|------------------|------------------|----------------|-------------------------|-----------|-----------|
|                  |                  |                | X                       | Y         | Z         |
| 1                | 7                | 0              | 1.082199                | 1.172305  | -1.197880 |
| 2                | 6                | 0              | 2.140174                | 0.689274  | -2.159602 |
| 3                | 1                | 0              | 1.672928                | -0.027349 | -2.843742 |
| 4                | 1                | 0              | 2.517547                | 1.513431  | -2.776077 |
| 5                | 6                | 0              | 1.629328                | 2.446904  | -0.587474 |
| 6                | 1                | 0              | 2.642416                | 2.226431  | -0.240493 |
| 7                | 1                | 0              | 1.725374                | 3.184268  | -1.393270 |
| 8                | 6                | 0              | -0.229267               | 1.426372  | -1.901771 |
| 9                | 1                | 0              | -0.800141               | 2.125500  | -1.290041 |
| 10               | 1                | 0              | -0.059396               | 1.901098  | -2.875232 |
| 11               | 27               | 0              | 0.853459                | -0.552305 | -0.133539 |
| 12               | 6                | 0              | 3.252351                | 0.021077  | -1.380957 |
| 13               | 6                | 0              | 4.569885                | -0.000072 | -1.822409 |
| 14               | 6                | 0              | 3.796979                | -1.249179 | 0.494553  |
| 15               | 6                | 0              | 5.527354                | -0.685649 | -1.069394 |
| 16               | 1                | 0              | 4.844759                | 0.504167  | -2.743516 |
| 17               | 6                | 0              | 5.131702                | -1.315344 | 0.110960  |
| 18               | 1                | 0              | 3.464025                | -1.733971 | 1.402164  |
| 19               | 1                | 0              | 6.561559                | -0.721792 | -1.397737 |
| 20               | 1                | 0              | 5.841472                | -1.854314 | 0.729084  |
| 21               | 6                | 0              | 0.858795                | 3.112685  | 0.535560  |
| 22               | 6                | 0              | -0.062788               | 4.136144  | 0.346648  |
| 23               | 6                | 0              | -0.635650               | 4.789909  | 1.447960  |
| 24               | 1                | 0              | -0.309360               | 4.454102  | -0.660847 |
| 25               | 6                | 0              | 0.658118                | 3.408194  | 2.912102  |
| 26               | 6                | 0              | -0.276042               | 4.418980  | 2.745793  |

|    |   |   |           |           |           |
|----|---|---|-----------|-----------|-----------|
| 27 | 1 | 0 | -1.343002 | 5.598585  | 1.287614  |
| 28 | 1 | 0 | 1.020050  | 3.078398  | 3.879892  |
| 29 | 1 | 0 | -0.689308 | 4.916693  | 3.616577  |
| 30 | 7 | 0 | 2.861032  | -0.597137 | -0.230581 |
| 31 | 7 | 0 | 1.182561  | 2.796015  | 1.823713  |
| 32 | 6 | 0 | -1.004709 | 0.123710  | -2.057852 |
| 33 | 1 | 0 | -2.023327 | 0.322210  | -2.406973 |
| 34 | 1 | 0 | -0.532911 | -0.524473 | -2.801620 |
| 35 | 7 | 0 | -1.020256 | -0.609513 | -0.749650 |
| 36 | 6 | 0 | -1.304569 | -2.072150 | -0.946466 |
| 37 | 1 | 0 | -2.379044 | -2.248208 | -1.048859 |
| 38 | 1 | 0 | -0.830197 | -2.393453 | -1.880753 |
| 39 | 6 | 0 | -2.000533 | 0.005387  | 0.266755  |
| 40 | 1 | 0 | -1.851215 | -0.559520 | 1.190480  |
| 41 | 1 | 0 | -1.649442 | 1.026578  | 0.443513  |
| 42 | 6 | 0 | -3.454818 | -0.000828 | -0.130285 |
| 43 | 6 | 0 | -4.292911 | -1.052953 | 0.276616  |
| 44 | 6 | 0 | -4.007279 | 1.056682  | -0.873366 |
| 45 | 6 | 0 | -5.642013 | -1.063292 | -0.078986 |
| 46 | 1 | 0 | -3.899581 | -1.852435 | 0.900819  |
| 47 | 6 | 0 | -5.355210 | 1.045406  | -1.231404 |
| 48 | 1 | 0 | -3.393865 | 1.912108  | -1.151380 |
| 49 | 6 | 0 | -6.172049 | -0.018721 | -0.840002 |
| 50 | 1 | 0 | -6.281826 | -1.876214 | 0.248734  |
| 51 | 1 | 0 | -5.772452 | 1.869326  | -1.801274 |
| 52 | 1 | 0 | -7.222507 | -0.024335 | -1.112333 |
| 53 | 6 | 0 | -0.710785 | -2.826734 | 0.213052  |
| 54 | 6 | 0 | -1.211752 | -4.033489 | 0.687754  |
| 55 | 6 | 0 | -0.583925 | -4.652603 | 1.770549  |
| 56 | 1 | 0 | -2.081605 | -4.480612 | 0.217609  |
| 57 | 6 | 0 | 0.964400  | -2.823130 | 1.837328  |
| 58 | 6 | 0 | 0.513277  | -4.026163 | 2.364496  |
| 59 | 1 | 0 | -0.955043 | -5.598030 | 2.153876  |
| 60 | 1 | 0 | 1.800630  | -2.304073 | 2.288794  |
| 61 | 1 | 0 | 1.013866  | -4.458371 | 3.223878  |
| 62 | 7 | 0 | 0.384600  | -2.236847 | 0.766075  |
| 63 | 1 | 0 | 1.906877  | 2.100226  | 1.983989  |

-----  
Co<sup>I</sup> HNPY 2<sub>b</sub>' (triplet) E(B3LYP/ SDD-6-31G(d,p))= -1466.12714691 hartree

-----  

| Center<br>Number | Atomic<br>Number | Atomic<br>Type | Coordinates (Angstroms) |   |   |
|------------------|------------------|----------------|-------------------------|---|---|
|                  |                  |                | X                       | Y | Z |

-----

|    |    |   |           |           |           |
|----|----|---|-----------|-----------|-----------|
| 1  | 7  | 0 | -1.656410 | -1.351374 | -1.170373 |
| 2  | 6  | 0 | -2.577825 | -0.678431 | -2.112284 |
| 3  | 1  | 0 | -1.994204 | -0.303529 | -2.960091 |
| 4  | 1  | 0 | -3.306236 | -1.380815 | -2.536466 |
| 5  | 6  | 0 | -2.290951 | -2.474465 | -0.440947 |
| 6  | 1  | 0 | -3.333986 | -2.194393 | -0.247684 |
| 7  | 1  | 0 | -2.316470 | -3.393158 | -1.043559 |
| 8  | 6  | 0 | -0.357055 | -1.728401 | -1.776050 |
| 9  | 1  | 0 | 0.106423  | -2.474644 | -1.126453 |
| 10 | 1  | 0 | -0.492884 | -2.206247 | -2.757059 |
| 11 | 27 | 0 | -1.253681 | 0.011891  | 0.392899  |
| 12 | 6  | 0 | -3.300022 | 0.503404  | -1.484200 |
| 13 | 6  | 0 | -4.534877 | 0.922257  | -1.977299 |
| 14 | 6  | 0 | -3.280233 | 2.254912  | 0.045263  |
| 15 | 6  | 0 | -5.148123 | 2.051044  | -1.436207 |
| 16 | 1  | 0 | -5.010356 | 0.365118  | -2.778303 |
| 17 | 6  | 0 | -4.504663 | 2.732097  | -0.402797 |
| 18 | 1  | 0 | -2.759053 | 2.756005  | 0.854365  |
| 19 | 1  | 0 | -6.109891 | 2.387656  | -1.809383 |
| 20 | 1  | 0 | -4.943054 | 3.611719  | 0.055058  |
| 21 | 6  | 0 | -1.612635 | -2.738242 | 0.894147  |
| 22 | 6  | 0 | -1.640451 | -4.002542 | 1.479660  |
| 23 | 6  | 0 | -1.092052 | -4.182285 | 2.749345  |
| 24 | 1  | 0 | -2.094218 | -4.833437 | 0.948958  |
| 25 | 6  | 0 | -0.510354 | -1.859391 | 2.743986  |
| 26 | 6  | 0 | -0.519551 | -3.086498 | 3.395850  |
| 27 | 1  | 0 | -1.110810 | -5.158296 | 3.223316  |
| 28 | 1  | 0 | -0.064048 | -0.986671 | 3.209885  |
| 29 | 1  | 0 | -0.082767 | -3.177587 | 4.384048  |
| 30 | 7  | 0 | -2.669812 | 1.164072  | -0.474874 |
| 31 | 7  | 0 | -1.039977 | -1.674539 | 1.515438  |
| 32 | 6  | 0 | 0.556503  | -0.516469 | -1.942440 |
| 33 | 1  | 0 | 1.474840  | -0.822746 | -2.457912 |
| 34 | 1  | 0 | 0.063933  | 0.215734  | -2.588697 |
| 35 | 7  | 0 | 0.878661  | 0.177181  | -0.653944 |
| 36 | 6  | 0 | 1.406351  | 1.517962  | -1.010235 |
| 37 | 1  | 0 | 2.366641  | 1.448619  | -1.535886 |
| 38 | 1  | 0 | 0.691255  | 1.984505  | -1.698694 |
| 39 | 6  | 0 | 1.890726  | -0.601851 | 0.169042  |
| 40 | 1  | 0 | 1.994781  | -0.061503 | 1.115315  |
| 41 | 1  | 0 | 1.414915  | -1.553033 | 0.410145  |
| 42 | 6  | 0 | 3.257302  | -0.835973 | -0.442004 |
| 43 | 6  | 0 | 4.322581  | 0.037395  | -0.171481 |
| 44 | 6  | 0 | 3.503172  | -1.955232 | -1.253828 |

|    |   |   |           |           |           |
|----|---|---|-----------|-----------|-----------|
| 45 | 6 | 0 | 5.587168  | -0.180521 | -0.719890 |
| 46 | 1 | 0 | 4.173430  | 0.876370  | 0.504754  |
| 47 | 6 | 0 | 4.765217  | -2.174998 | -1.806787 |
| 48 | 1 | 0 | 2.712482  | -2.679468 | -1.434958 |
| 49 | 6 | 0 | 5.808150  | -1.283910 | -1.546171 |
| 50 | 1 | 0 | 6.402799  | 0.498053  | -0.489986 |
| 51 | 1 | 0 | 4.938535  | -3.048716 | -2.427015 |
| 52 | 1 | 0 | 6.792179  | -1.459102 | -1.968982 |
| 53 | 6 | 0 | 1.583383  | 2.471255  | 0.148539  |
| 54 | 6 | 0 | 2.643465  | 3.366635  | 0.264392  |
| 55 | 6 | 0 | 2.672615  | 4.276287  | 1.323762  |
| 56 | 1 | 0 | 3.436017  | 3.345926  | -0.475204 |
| 57 | 6 | 0 | 0.608282  | 3.377942  | 2.133678  |
| 58 | 6 | 0 | 1.644709  | 4.281816  | 2.275226  |
| 59 | 1 | 0 | 3.496922  | 4.977228  | 1.411698  |
| 60 | 1 | 0 | -0.227477 | 3.307711  | 2.820240  |
| 61 | 1 | 0 | 1.647738  | 4.973324  | 3.109750  |
| 62 | 7 | 0 | 0.610825  | 2.521562  | 1.086786  |
| 63 | 1 | 0 | -0.166053 | 1.843203  | 0.957670  |

-----

Co<sup>I</sup> HNP<sub>y</sub> 2'<sub>D</sub> (singlet) E(B3LYP/ SDD-6-31G(d,p))= -1466.08305435 hartree

| Center<br>Number | Atomic<br>Number | Atomic<br>Type | Coordinates (Angstroms) |           |           |
|------------------|------------------|----------------|-------------------------|-----------|-----------|
|                  |                  |                | X                       | Y         | Z         |
| 1                | 7                | 0              | -1.651587               | -1.668768 | -0.780799 |
| 2                | 6                | 0              | -2.694778               | -1.462750 | -1.818213 |
| 3                | 1                | 0              | -2.195016               | -1.250949 | -2.771134 |
| 4                | 1                | 0              | -3.304110               | -2.361778 | -1.974423 |
| 5                | 6                | 0              | -2.213858               | -2.272931 | 0.458999  |
| 6                | 1                | 0              | -3.303519               | -2.164279 | 0.436830  |
| 7                | 1                | 0              | -2.008626               | -3.348322 | 0.505975  |
| 8                | 6                | 0              | -0.398072               | -2.320933 | -1.262027 |
| 9                | 1                | 0              | 0.029782                | -2.880667 | -0.428856 |
| 10               | 1                | 0              | -0.600965               | -3.041210 | -2.063194 |
| 11               | 27               | 0              | -1.084282               | 0.263460  | -0.274650 |
| 12               | 6                | 0              | -3.559897               | -0.278742 | -1.420704 |
| 13               | 6                | 0              | -4.869651               | -0.115038 | -1.856930 |
| 14               | 6                | 0              | -3.647427               | 1.749392  | -0.245771 |
| 15               | 6                | 0              | -5.576687               | 1.026918  | -1.472542 |
| 16               | 1                | 0              | -5.330422               | -0.868839 | -2.487011 |
| 17               | 6                | 0              | -4.956644               | 1.971826  | -0.653649 |
| 18               | 1                | 0              | -3.117782               | 2.449588  | 0.388767  |



|    |   |   |           |           |           |
|----|---|---|-----------|-----------|-----------|
| 19 | 1 | 0 | -6.599936 | 1.172090  | -1.804218 |
| 20 | 1 | 0 | -5.474614 | 2.868684  | -0.333177 |
| 21 | 6 | 0 | -1.690459 | -1.568329 | 1.692054  |
| 22 | 6 | 0 | -1.772619 | -2.117988 | 2.968743  |
| 23 | 6 | 0 | -1.328455 | -1.374596 | 4.062625  |
| 24 | 1 | 0 | -2.182058 | -3.114440 | 3.100241  |
| 25 | 6 | 0 | -0.721895 | 0.392024  | 2.554459  |
| 26 | 6 | 0 | -0.795657 | -0.102065 | 3.850952  |
| 27 | 1 | 0 | -1.390597 | -1.787139 | 5.064555  |
| 28 | 1 | 0 | -0.278467 | 1.350260  | 2.310786  |
| 29 | 1 | 0 | -0.431355 | 0.502301  | 4.674018  |
| 30 | 7 | 0 | -2.960477 | 0.648436  | -0.622697 |
| 31 | 7 | 0 | -1.171688 | -0.330232 | 1.506727  |
| 32 | 6 | 0 | 0.581204  | -1.253393 | -1.747140 |
| 33 | 1 | 0 | 1.529954  | -1.709594 | -2.048351 |
| 34 | 1 | 0 | 0.175621  | -0.747625 | -2.631639 |
| 35 | 7 | 0 | 0.826010  | -0.198418 | -0.691413 |
| 36 | 6 | 0 | 1.425604  | 0.994393  | -1.392509 |
| 37 | 1 | 0 | 2.259951  | 0.639780  | -2.008046 |
| 38 | 1 | 0 | 0.659188  | 1.361092  | -2.092566 |
| 39 | 6 | 0 | 1.734662  | -0.723831 | 0.420345  |
| 40 | 1 | 0 | 1.855837  | 0.112214  | 1.107540  |
| 41 | 1 | 0 | 1.168492  | -1.499395 | 0.938318  |
| 42 | 6 | 0 | 3.070740  | -1.279670 | -0.023545 |
| 43 | 6 | 0 | 4.193299  | -0.448807 | -0.168377 |
| 44 | 6 | 0 | 3.224949  | -2.659179 | -0.241383 |
| 45 | 6 | 0 | 5.425704  | -0.979793 | -0.550542 |
| 46 | 1 | 0 | 4.113677  | 0.613661  | 0.040228  |
| 47 | 6 | 0 | 4.456427  | -3.191733 | -0.623096 |
| 48 | 1 | 0 | 2.385604  | -3.333233 | -0.081451 |
| 49 | 6 | 0 | 5.558488  | -2.349905 | -0.784893 |
| 50 | 1 | 0 | 6.286308  | -0.325920 | -0.650566 |
| 51 | 1 | 0 | 4.559212  | -4.260942 | -0.778918 |
| 52 | 1 | 0 | 6.519603  | -2.762046 | -1.075136 |
| 53 | 6 | 0 | 1.911183  | 2.169763  | -0.554126 |
| 54 | 6 | 0 | 2.917571  | 2.977059  | -1.097661 |
| 55 | 6 | 0 | 3.322531  | 4.114510  | -0.400140 |
| 56 | 1 | 0 | 3.374362  | 2.722847  | -2.049494 |
| 57 | 6 | 0 | 1.739945  | 3.530764  | 1.295193  |
| 58 | 6 | 0 | 2.721659  | 4.400228  | 0.824815  |
| 59 | 1 | 0 | 4.095889  | 4.759798  | -0.804465 |
| 60 | 1 | 0 | 1.255928  | 3.716253  | 2.251106  |
| 61 | 1 | 0 | 3.007512  | 5.269738  | 1.406516  |
| 62 | 7 | 0 | 1.333111  | 2.439952  | 0.625328  |

63            1            0            -0.758612      1.604714      0.123674

-----

Co<sup>I</sup> HNPY 2'E (triplet) E(B3LYP/ SDD-6-31G(d,p))= -1466.13856350 hartree

-----

| Center<br>Number | Atomic<br>Number | Atomic<br>Type | Coordinates (Angstroms) |           |           |
|------------------|------------------|----------------|-------------------------|-----------|-----------|
|                  |                  |                | X                       | Y         | Z         |
| 1                | 7                | 0              | 1.348366                | 1.104907  | -1.146802 |
| 2                | 6                | 0              | 2.115463                | 0.482368  | -2.248445 |
| 3                | 1                | 0              | 1.440267                | -0.171487 | -2.810628 |
| 4                | 1                | 0              | 2.480665                | 1.237435  | -2.959458 |
| 5                | 6                | 0              | 2.135035                | 2.223409  | -0.569584 |
| 6                | 1                | 0              | 3.163775                | 1.872009  | -0.420632 |
| 7                | 1                | 0              | 2.191790                | 3.069689  | -1.269853 |
| 8                | 6                | 0              | 0.039082                | 1.608040  | -1.676748 |
| 9                | 1                | 0              | -0.333422               | 2.347983  | -0.965046 |
| 10               | 1                | 0              | 0.189775                | 2.131686  | -2.632597 |
| 11               | 27               | 0              | 0.511373                | -0.054741 | 0.683891  |
| 12               | 6                | 0              | 3.293883                | -0.358228 | -1.808928 |
| 13               | 6                | 0              | 4.496211                | -0.423713 | -2.506544 |
| 14               | 6                | 0              | 4.095358                | -1.996432 | -0.273263 |
| 15               | 6                | 0              | 5.499689                | -1.297270 | -2.079442 |
| 16               | 1                | 0              | 4.640892                | 0.202909  | -3.379894 |
| 17               | 6                | 0              | 5.298794                | -2.096966 | -0.948637 |
| 18               | 1                | 0              | 3.854074                | -2.568505 | 0.614893  |
| 19               | 1                | 0              | 6.437067                | -1.351152 | -2.624315 |
| 20               | 1                | 0              | 6.061219                | -2.781479 | -0.595351 |
| 21               | 6                | 0              | 1.595152                | 2.690650  | 0.765163  |
| 22               | 6                | 0              | 1.846991                | 3.979043  | 1.233138  |
| 23               | 6                | 0              | 1.394531                | 4.343117  | 2.501126  |
| 24               | 1                | 0              | 2.391023                | 4.685453  | 0.614234  |
| 25               | 6                | 0              | 0.465763                | 2.147348  | 2.720265  |
| 26               | 6                | 0              | 0.692119                | 3.407146  | 3.261189  |
| 27               | 1                | 0              | 1.583248                | 5.340160  | 2.885968  |
| 28               | 1                | 0              | -0.088467               | 1.394208  | 3.271249  |
| 29               | 1                | 0              | 0.318898                | 3.646378  | 4.250586  |
| 30               | 7                | 0              | 3.144216                | -1.148316 | -0.721109 |
| 31               | 7                | 0              | 0.905468                | 1.786157  | 1.494052  |
| 32               | 6                | 0              | -0.992229               | 0.494940  | -1.854837 |
| 33               | 1                | 0              | -1.896618               | 0.913894  | -2.309923 |
| 34               | 1                | 0              | -0.622011               | -0.251303 | -2.563245 |
| 35               | 7                | 0              | -1.288603               | -0.184474 | -0.567699 |
| 36               | 6                | 0              | -1.525014               | -1.639285 | -0.733773 |

|    |   |   |           |           |           |
|----|---|---|-----------|-----------|-----------|
| 37 | 1 | 0 | -2.564158 | -1.863949 | -0.997829 |
| 38 | 1 | 0 | -0.906254 | -1.990837 | -1.567492 |
| 39 | 6 | 0 | -2.412125 | 0.483933  | 0.200595  |
| 40 | 1 | 0 | -2.449691 | -0.013854 | 1.174946  |
| 41 | 1 | 0 | -2.090016 | 1.513217  | 0.382586  |
| 42 | 6 | 0 | -3.783054 | 0.472476  | -0.439986 |
| 43 | 6 | 0 | -4.683971 | -0.574174 | -0.185662 |
| 44 | 6 | 0 | -4.196080 | 1.524812  | -1.272680 |
| 45 | 6 | 0 | -5.948125 | -0.587808 | -0.776107 |
| 46 | 1 | 0 | -4.408362 | -1.368069 | 0.505258  |
| 47 | 6 | 0 | -5.459593 | 1.513396  | -1.864925 |
| 48 | 1 | 0 | -3.540093 | 2.377318  | -1.435737 |
| 49 | 6 | 0 | -6.334539 | 0.452602  | -1.623471 |
| 50 | 1 | 0 | -6.636480 | -1.399612 | -0.562784 |
| 51 | 1 | 0 | -5.766540 | 2.338256  | -2.500253 |
| 52 | 1 | 0 | -7.320328 | 0.446540  | -2.077452 |
| 53 | 6 | 0 | -1.109487 | -2.412956 | 0.499230  |
| 54 | 6 | 0 | -1.785005 | -3.555424 | 0.922806  |
| 55 | 6 | 0 | -1.319678 | -4.255259 | 2.036842  |
| 56 | 1 | 0 | -2.667733 | -3.887981 | 0.386534  |
| 57 | 6 | 0 | 0.439765  | -2.643178 | 2.224594  |
| 58 | 6 | 0 | -0.186274 | -3.787986 | 2.703062  |
| 59 | 1 | 0 | -1.837114 | -5.144517 | 2.382501  |
| 60 | 1 | 0 | 1.320290  | -2.241899 | 2.717224  |
| 61 | 1 | 0 | 0.204907  | -4.293958 | 3.578606  |
| 62 | 7 | 0 | -0.001059 | -1.964033 | 1.141280  |
| 63 | 1 | 0 | 2.247644  | -1.037809 | -0.185082 |

-----  
 Co<sup>I</sup> HNP<sub>y</sub> 2'<sub>E</sub>(singlet) E(B3LYP/ SDD-6-31G(d,p))= -1466.11879973 hartree

| Center<br>Number | Atomic<br>Number | Atomic<br>Type | Coordinates (Angstroms) |           |           |
|------------------|------------------|----------------|-------------------------|-----------|-----------|
|                  |                  |                | X                       | Y         | Z         |
| 1                | 7                | 0              | -0.816658               | -1.838897 | 0.212729  |
| 2                | 6                | 0              | -1.691003               | -2.312638 | -0.912430 |
| 3                | 1                | 0              | -1.035887               | -2.539027 | -1.759830 |
| 4                | 1                | 0              | -2.168727               | -3.257897 | -0.630330 |
| 5                | 6                | 0              | -1.479138               | -2.052135 | 1.535898  |
| 6                | 1                | 0              | -2.015957               | -3.008636 | 1.579046  |
| 7                | 1                | 0              | -0.693122               | -2.087596 | 2.297195  |
| 8                | 6                | 0              | 0.505350                | -2.552566 | 0.084876  |
| 9                | 1                | 0              | 0.953505                | -2.606784 | 1.077904  |
| 10               | 1                | 0              | 0.371092                | -3.584000 | -0.262633 |

|    |    |   |           |           |           |
|----|----|---|-----------|-----------|-----------|
| 11 | 27 | 0 | -0.299481 | 0.128312  | 0.323530  |
| 12 | 6  | 0 | -2.752551 | -1.378511 | -1.449856 |
| 13 | 6  | 0 | -4.012312 | -1.811588 | -1.849668 |
| 14 | 6  | 0 | -3.220309 | 0.794027  | -2.289556 |
| 15 | 6  | 0 | -4.878840 | -0.919438 | -2.488945 |
| 16 | 1  | 0 | -4.308468 | -2.840299 | -1.674585 |
| 17 | 6  | 0 | -4.478262 | 0.400412  | -2.718349 |
| 18 | 1  | 0 | -2.833085 | 1.799605  | -2.411382 |
| 19 | 1  | 0 | -5.861597 | -1.254008 | -2.806006 |
| 20 | 1  | 0 | -5.127937 | 1.111598  | -3.215453 |
| 21 | 6  | 0 | -2.399474 | -0.890653 | 1.830457  |
| 22 | 6  | 0 | -3.535615 | -1.017646 | 2.623664  |
| 23 | 6  | 0 | -4.311664 | 0.111130  | 2.889744  |
| 24 | 1  | 0 | -3.803417 | -1.986578 | 3.032807  |
| 25 | 6  | 0 | -2.793405 | 1.374804  | 1.529096  |
| 26 | 6  | 0 | -3.935713 | 1.327418  | 2.320956  |
| 27 | 1  | 0 | -5.194730 | 0.038623  | 3.516134  |
| 28 | 1  | 0 | -2.489475 | 2.299985  | 1.055196  |
| 29 | 1  | 0 | -4.515761 | 2.229428  | 2.481825  |
| 30 | 7  | 0 | -2.404368 | -0.095468 | -1.690846 |
| 31 | 7  | 0 | -2.010329 | 0.298695  | 1.297630  |
| 32 | 6  | 0 | 1.400245  | -1.757367 | -0.864356 |
| 33 | 1  | 0 | 2.380534  | -2.234094 | -0.966135 |
| 34 | 1  | 0 | 0.958256  | -1.710472 | -1.864375 |
| 35 | 7  | 0 | 1.509172  | -0.367452 | -0.341423 |
| 36 | 6  | 0 | 1.798306  | 0.658827  | -1.380274 |
| 37 | 1  | 0 | 2.849525  | 0.653453  | -1.688394 |
| 38 | 1  | 0 | 1.194009  | 0.428340  | -2.264763 |
| 39 | 6  | 0 | 2.525048  | -0.280984 | 0.803557  |
| 40 | 1  | 0 | 2.475228  | 0.742781  | 1.175988  |
| 41 | 1  | 0 | 2.148247  | -0.921905 | 1.603749  |
| 42 | 6  | 0 | 3.950009  | -0.652267 | 0.459316  |
| 43 | 6  | 0 | 4.855977  | 0.323102  | 0.012213  |
| 44 | 6  | 0 | 4.409003  | -1.968815 | 0.625823  |
| 45 | 6  | 0 | 6.174707  | -0.015583 | -0.292803 |
| 46 | 1  | 0 | 4.539543  | 1.360617  | -0.066273 |
| 47 | 6  | 0 | 5.727452  | -2.309636 | 0.322030  |
| 48 | 1  | 0 | 3.742959  | -2.730521 | 1.026004  |
| 49 | 6  | 0 | 6.610132  | -1.334069 | -0.145402 |
| 50 | 1  | 0 | 6.865772  | 0.750909  | -0.629144 |
| 51 | 1  | 0 | 6.069008  | -3.329987 | 0.464501  |
| 52 | 1  | 0 | 7.637908  | -1.596111 | -0.375334 |
| 53 | 6  | 0 | 1.404333  | 1.999307  | -0.801240 |
| 54 | 6  | 0 | 2.032876  | 3.190575  | -1.148045 |

|    |   |   |           |          |           |
|----|---|---|-----------|----------|-----------|
| 55 | 6 | 0 | 1.652785  | 4.374902 | -0.514159 |
| 56 | 1 | 0 | 2.820020  | 3.185983 | -1.895073 |
| 57 | 6 | 0 | 0.088802  | 3.091234 | 0.773049  |
| 58 | 6 | 0 | 0.676247  | 4.317292 | 0.478813  |
| 59 | 1 | 0 | 2.130183  | 5.315105 | -0.770335 |
| 60 | 1 | 0 | -0.646563 | 3.007836 | 1.563265  |
| 61 | 1 | 0 | 0.378399  | 5.201754 | 1.030806  |
| 62 | 7 | 0 | 0.409353  | 1.948893 | 0.128638  |
| 63 | 1 | 0 | -1.481582 | 0.222274 | -1.213240 |

-----

Co<sup>I</sup> HNPY 2<sub>F</sub> (triplet) E(B3LYP/ SDD-6-31G(d,p))= -1466.13390023 hartree

-----

| Center<br>Number | Atomic<br>Number | Atomic<br>Type | Coordinates (Angstroms) |           |           |
|------------------|------------------|----------------|-------------------------|-----------|-----------|
|                  |                  |                | X                       | Y         | Z         |
| 1                | 7                | 0              | 1.370007                | 1.228515  | -1.173389 |
| 2                | 6                | 0              | 2.268037                | 0.557267  | -2.154949 |
| 3                | 1                | 0              | 1.646666                | -0.051644 | -2.817716 |
| 4                | 1                | 0              | 2.782337                | 1.288958  | -2.792823 |
| 5                | 6                | 0              | 2.078724                | 2.410728  | -0.635444 |
| 6                | 1                | 0              | 3.114899                | 2.111625  | -0.432535 |
| 7                | 1                | 0              | 2.125513                | 3.224174  | -1.373568 |
| 8                | 6                | 0              | 0.071373                | 1.614304  | -1.796599 |
| 9                | 1                | 0              | -0.402796               | 2.347039  | -1.137310 |
| 10               | 1                | 0              | 0.233991                | 2.118675  | -2.760252 |
| 11               | 27               | 0              | 0.838123                | -0.674249 | 0.118467  |
| 12               | 6                | 0              | 3.264819                | -0.353773 | -1.472665 |
| 13               | 6                | 0              | 4.584417                | -0.473513 | -1.898420 |
| 14               | 6                | 0              | 3.575097                | -2.002776 | 0.135023  |
| 15               | 6                | 0              | 5.419757                | -1.400551 | -1.269641 |
| 16               | 1                | 0              | 4.951797                | 0.141023  | -2.713994 |
| 17               | 6                | 0              | 4.905441                | -2.179876 | -0.234987 |
| 18               | 1                | 0              | 3.128927                | -2.600728 | 0.922818  |
| 19               | 1                | 0              | 6.451828                | -1.511901 | -1.586343 |
| 20               | 1                | 0              | 5.515912                | -2.916370 | 0.275352  |
| 21               | 6                | 0              | 1.519088                | 2.974294  | 0.651752  |
| 22               | 6                | 0              | 1.468149                | 4.335091  | 0.938141  |
| 23               | 6                | 0              | 1.036630                | 4.765261  | 2.195927  |
| 24               | 1                | 0              | 1.772376                | 5.050426  | 0.181795  |
| 25               | 6                | 0              | 0.699631                | 2.485794  | 2.838861  |
| 26               | 6                | 0              | 0.648797                | 3.830359  | 3.162298  |
| 27               | 1                | 0              | 1.000612                | 5.826734  | 2.420634  |
| 28               | 1                | 0              | 0.411307                | 1.691187  | 3.517551  |

|    |   |   |           |           |           |
|----|---|---|-----------|-----------|-----------|
| 29 | 1 | 0 | 0.310095  | 4.136984  | 4.145147  |
| 30 | 7 | 0 | 2.766813  | -1.105641 | -0.463471 |
| 31 | 7 | 0 | 1.130119  | 2.107779  | 1.615536  |
| 32 | 6 | 0 | -0.871267 | 0.422017  | -2.011893 |
| 33 | 1 | 0 | -1.807016 | 0.791087  | -2.449599 |
| 34 | 1 | 0 | -0.442059 | -0.272201 | -2.739432 |
| 35 | 7 | 0 | -1.106631 | -0.331124 | -0.757499 |
| 36 | 6 | 0 | -1.549540 | -1.728981 | -0.992448 |
| 37 | 1 | 0 | -2.609025 | -1.785015 | -1.266375 |
| 38 | 1 | 0 | -0.976395 | -2.124337 | -1.839208 |
| 39 | 6 | 0 | -2.044562 | 0.388253  | 0.190127  |
| 40 | 1 | 0 | -2.032771 | -0.183481 | 1.122325  |
| 41 | 1 | 0 | -1.591505 | 1.360574  | 0.404880  |
| 42 | 6 | 0 | -3.470751 | 0.578702  | -0.281404 |
| 43 | 6 | 0 | -4.457427 | -0.368001 | 0.036042  |
| 44 | 6 | 0 | -3.842685 | 1.714231  | -1.018225 |
| 45 | 6 | 0 | -5.773202 | -0.199670 | -0.396904 |
| 46 | 1 | 0 | -4.201250 | -1.230754 | 0.646714  |
| 47 | 6 | 0 | -5.157373 | 1.884226  | -1.453710 |
| 48 | 1 | 0 | -3.108568 | 2.487654  | -1.234810 |
| 49 | 6 | 0 | -6.123483 | 0.923475  | -1.148806 |
| 50 | 1 | 0 | -6.526352 | -0.937087 | -0.137567 |
| 51 | 1 | 0 | -5.430141 | 2.769871  | -2.018944 |
| 52 | 1 | 0 | -7.147609 | 1.057343  | -1.482095 |
| 53 | 6 | 0 | -1.273758 | -2.592082 | 0.227547  |
| 54 | 6 | 0 | -2.082587 | -3.678717 | 0.555505  |
| 55 | 6 | 0 | -1.753732 | -4.466062 | 1.659295  |
| 56 | 1 | 0 | -2.955339 | -3.904197 | -0.048922 |
| 57 | 6 | 0 | 0.127673  | -3.032697 | 2.029031  |
| 58 | 6 | 0 | -0.628283 | -4.134342 | 2.413949  |
| 59 | 1 | 0 | -2.368823 | -5.318713 | 1.928637  |
| 60 | 1 | 0 | 1.009378  | -2.738807 | 2.590777  |
| 61 | 1 | 0 | -0.339693 | -4.713509 | 3.283969  |
| 62 | 7 | 0 | -0.176128 | -2.276142 | 0.954658  |
| 63 | 1 | 0 | 1.131214  | 1.088631  | 1.357022  |

-----

Co<sup>I</sup> HNPY 2<sub>F</sub> (singlet) E(B3LYP/ SDD-6-31G(d,p))= -1466.12399484 hartree

| Center<br>Number | Atomic<br>Number | Atomic<br>Type | Coordinates (Angstroms) |          |           |
|------------------|------------------|----------------|-------------------------|----------|-----------|
|                  |                  |                | X                       | Y        | Z         |
| 1                | 7                | 0              | 1.154618                | 1.245356 | -1.260378 |
| 2                | 6                | 0              | 2.159208                | 0.733756 | -2.246622 |

|    |    |   |           |           |           |
|----|----|---|-----------|-----------|-----------|
| 3  | 1  | 0 | 1.642356  | 0.066715  | -2.942614 |
| 4  | 1  | 0 | 2.591673  | 1.550654  | -2.839699 |
| 5  | 6  | 0 | 1.752534  | 2.434017  | -0.581048 |
| 6  | 1  | 0 | 2.802682  | 2.201317  | -0.374617 |
| 7  | 1  | 0 | 1.743780  | 3.297908  | -1.256986 |
| 8  | 6  | 0 | -0.151948 | 1.604366  | -1.905092 |
| 9  | 1  | 0 | -0.648381 | 2.329763  | -1.255111 |
| 10 | 1  | 0 | 0.009601  | 2.096778  | -2.872246 |
| 11 | 27 | 0 | 0.840911  | -0.443121 | -0.184691 |
| 12 | 6  | 0 | 3.227330  | -0.030228 | -1.496773 |
| 13 | 6  | 0 | 4.537709  | -0.126324 | -1.951625 |
| 14 | 6  | 0 | 3.700563  | -1.366093 | 0.338082  |
| 15 | 6  | 0 | 5.454878  | -0.890004 | -1.227295 |
| 16 | 1  | 0 | 4.833681  | 0.383407  | -2.862874 |
| 17 | 6  | 0 | 5.024713  | -1.518424 | -0.060517 |
| 18 | 1  | 0 | 3.342194  | -1.844543 | 1.239307  |
| 19 | 1  | 0 | 6.481299  | -0.986301 | -1.565674 |
| 20 | 1  | 0 | 5.699460  | -2.118414 | 0.539770  |
| 21 | 6  | 0 | 1.115046  | 2.837225  | 0.730118  |
| 22 | 6  | 0 | 0.961336  | 4.161876  | 1.127302  |
| 23 | 6  | 0 | 0.468378  | 4.447224  | 2.404343  |
| 24 | 1  | 0 | 1.233324  | 4.962317  | 0.447559  |
| 25 | 6  | 0 | 0.282693  | 2.099466  | 2.828767  |
| 26 | 6  | 0 | 0.125803  | 3.404086  | 3.270104  |
| 27 | 1  | 0 | 0.349711  | 5.479043  | 2.719857  |
| 28 | 1  | 0 | 0.032405  | 1.230423  | 3.427266  |
| 29 | 1  | 0 | -0.259031 | 3.596603  | 4.265041  |
| 30 | 7  | 0 | 2.800837  | -0.641266 | -0.358034 |
| 31 | 7  | 0 | 0.771050  | 1.858816  | 1.596331  |
| 32 | 6  | 0 | -1.021143 | 0.360898  | -2.067779 |
| 33 | 1  | 0 | -2.017724 | 0.637406  | -2.428550 |
| 34 | 1  | 0 | -0.585812 | -0.307723 | -2.814917 |
| 35 | 7  | 0 | -1.085384 | -0.381180 | -0.773112 |
| 36 | 6  | 0 | -1.381008 | -1.833164 | -0.982377 |
| 37 | 1  | 0 | -2.449979 | -2.013447 | -1.131642 |
| 38 | 1  | 0 | -0.864016 | -2.157008 | -1.891706 |
| 39 | 6  | 0 | -2.077359 | 0.235213  | 0.203970  |
| 40 | 1  | 0 | -1.963896 | -0.330198 | 1.132402  |
| 41 | 1  | 0 | -1.726818 | 1.251552  | 0.398251  |
| 42 | 6  | 0 | -3.528482 | 0.262177  | -0.222000 |
| 43 | 6  | 0 | -4.393950 | -0.788668 | 0.121652  |
| 44 | 6  | 0 | -4.048998 | 1.355883  | -0.932335 |
| 45 | 6  | 0 | -5.734741 | -0.763067 | -0.263723 |
| 46 | 1  | 0 | -4.024831 | -1.620403 | 0.717579  |

|    |   |   |           |           |           |
|----|---|---|-----------|-----------|-----------|
| 47 | 6 | 0 | -5.389015 | 1.383368  | -1.319851 |
| 48 | 1 | 0 | -3.412363 | 2.207783  | -1.163111 |
| 49 | 6 | 0 | -6.232058 | 0.319626  | -0.991872 |
| 50 | 1 | 0 | -6.393271 | -1.579715 | 0.014735  |
| 51 | 1 | 0 | -5.777673 | 2.237908  | -1.864670 |
| 52 | 1 | 0 | -7.275945 | 0.342326  | -1.287838 |
| 53 | 6 | 0 | -0.842131 | -2.602679 | 0.197229  |
| 54 | 6 | 0 | -1.430544 | -3.764040 | 0.688449  |
| 55 | 6 | 0 | -0.857014 | -4.406844 | 1.785963  |
| 56 | 1 | 0 | -2.325283 | -4.156005 | 0.216060  |
| 57 | 6 | 0 | 0.808307  | -2.682656 | 1.827034  |
| 58 | 6 | 0 | 0.276620  | -3.845667 | 2.372797  |
| 59 | 1 | 0 | -1.295014 | -5.316763 | 2.183066  |
| 60 | 1 | 0 | 1.676348  | -2.212403 | 2.273557  |
| 61 | 1 | 0 | 0.744701  | -4.295468 | 3.241231  |
| 62 | 7 | 0 | 0.282734  | -2.072358 | 0.744397  |
| 63 | 1 | 0 | 0.824868  | 0.837222  | 1.197394  |

-----  
Co<sup>III</sup>-H 2'A (singlet) E(B3LYP/ SDD-6-31G(d,p)) = -1466.14666319 hartree

| Center<br>Number | Atomic<br>Number | Atomic<br>Type | Coordinates (Angstroms) |           |           |
|------------------|------------------|----------------|-------------------------|-----------|-----------|
|                  |                  |                | X                       | Y         | Z         |
| 1                | 7                | 0              | 0.838549                | -0.614224 | 1.611475  |
| 2                | 6                | 0              | 2.019980                | 0.134441  | 2.107919  |
| 3                | 1                | 0              | 1.734821                | 1.183567  | 2.240868  |
| 4                | 1                | 0              | 2.371139                | -0.236406 | 3.079557  |
| 5                | 6                | 0              | 1.122437                | -2.080159 | 1.596737  |
| 6                | 1                | 0              | 2.202729                | -2.232927 | 1.685947  |
| 7                | 1                | 0              | 0.671181                | -2.575010 | 2.463495  |
| 8                | 6                | 0              | -0.473288               | -0.316520 | 2.265057  |
| 9                | 1                | 0              | -1.039532               | -1.249666 | 2.301656  |
| 10               | 1                | 0              | -0.336386               | 0.010035  | 3.302741  |
| 11               | 27               | 0              | 0.714716                | 0.048111  | -0.376087 |
| 12               | 6                | 0              | 3.109979                | 0.010555  | 1.055136  |
| 13               | 6                | 0              | 4.469049                | 0.003802  | 1.353435  |
| 14               | 6                | 0              | 3.560328                | -0.222955 | -1.230134 |
| 15               | 6                | 0              | 5.394484                | -0.111768 | 0.312342  |
| 16               | 1                | 0              | 4.798446                | 0.082084  | 2.384507  |
| 17               | 6                | 0              | 4.933097                | -0.231489 | -0.998178 |
| 18               | 1                | 0              | 3.149410                | -0.306944 | -2.229507 |
| 19               | 1                | 0              | 6.458672                | -0.117601 | 0.525623  |
| 20               | 1                | 0              | 5.618660                | -0.331040 | -1.832249 |



|    |   |   |           |           |           |
|----|---|---|-----------|-----------|-----------|
| 21 | 6 | 0 | 0.668011  | -2.711333 | 0.304140  |
| 22 | 6 | 0 | 0.487551  | -4.086962 | 0.170935  |
| 23 | 6 | 0 | 0.170320  | -4.613660 | -1.079842 |
| 24 | 1 | 0 | 0.602797  | -4.733133 | 1.035256  |
| 25 | 6 | 0 | 0.218179  | -2.382661 | -1.958731 |
| 26 | 6 | 0 | 0.042063  | -3.744887 | -2.164687 |
| 27 | 1 | 0 | 0.028036  | -5.682150 | -1.205958 |
| 28 | 1 | 0 | 0.116357  | -1.671128 | -2.768296 |
| 29 | 1 | 0 | -0.196916 | -4.110275 | -3.157111 |
| 30 | 7 | 0 | 2.670447  | -0.099022 | -0.228198 |
| 31 | 7 | 0 | 0.518803  | -1.869918 | -0.744154 |
| 32 | 6 | 0 | -1.251614 | 0.734449  | 1.482536  |
| 33 | 1 | 0 | -2.284190 | 0.789313  | 1.842112  |
| 34 | 1 | 0 | -0.804459 | 1.717699  | 1.633497  |
| 35 | 7 | 0 | -1.241050 | 0.445758  | -0.000222 |
| 36 | 6 | 0 | -1.530947 | 1.710079  | -0.736490 |
| 37 | 1 | 0 | -1.658045 | 1.457818  | -1.794569 |
| 38 | 1 | 0 | -2.465176 | 2.163092  | -0.389662 |
| 39 | 6 | 0 | -2.256333 | -0.624966 | -0.379206 |
| 40 | 1 | 0 | -2.101608 | -0.807739 | -1.444664 |
| 41 | 1 | 0 | -1.964316 | -1.531115 | 0.153557  |
| 42 | 6 | 0 | -3.706515 | -0.298903 | -0.100828 |
| 43 | 6 | 0 | -4.493954 | 0.349272  | -1.065732 |
| 44 | 6 | 0 | -4.305951 | -0.686140 | 1.108586  |
| 45 | 6 | 0 | -5.837074 | 0.630503  | -0.815033 |
| 46 | 1 | 0 | -4.065963 | 0.613715  | -2.029837 |
| 47 | 6 | 0 | -5.648986 | -0.404962 | 1.361539  |
| 48 | 1 | 0 | -3.730137 | -1.237645 | 1.849203  |
| 49 | 6 | 0 | -6.414485 | 0.259745  | 0.401496  |
| 50 | 1 | 0 | -6.436028 | 1.124283  | -1.573626 |
| 51 | 1 | 0 | -6.100240 | -0.716930 | 2.298024  |
| 52 | 1 | 0 | -7.461377 | 0.472192  | 0.593120  |
| 53 | 6 | 0 | -0.370831 | 2.650721  | -0.584568 |
| 54 | 6 | 0 | -0.496865 | 4.029488  | -0.728845 |
| 55 | 6 | 0 | 0.637661  | 4.831944  | -0.624710 |
| 56 | 1 | 0 | -1.472411 | 4.462213  | -0.924354 |
| 57 | 6 | 0 | 1.915379  | 2.841313  | -0.224830 |
| 58 | 6 | 0 | 1.865148  | 4.222605  | -0.366646 |
| 59 | 1 | 0 | 0.564719  | 5.908508  | -0.739893 |
| 60 | 1 | 0 | 2.856861  | 2.345950  | -0.032027 |
| 61 | 1 | 0 | 2.776620  | 4.802530  | -0.275295 |
| 62 | 7 | 0 | 0.819950  | 2.058591  | -0.325597 |
| 63 | 1 | 0 | 0.661168  | 0.310112  | -1.799289 |

---

Co<sup>III</sup>-H 2'<sub>A</sub> (triplet) E(B3LYP/ SDD-6-31G(d,p))= -1466.12547935 hartree

| Center<br>Number | Atomic<br>Number | Atomic<br>Type | Coordinates (Angstroms) |           |           |
|------------------|------------------|----------------|-------------------------|-----------|-----------|
|                  |                  |                | X                       | Y         | Z         |
| 1                | 7                | 0              | 0.830068                | -0.718497 | 1.477495  |
| 2                | 6                | 0              | 1.924478                | 0.056983  | 2.121750  |
| 3                | 1                | 0              | 1.572507                | 1.084372  | 2.264541  |
| 4                | 1                | 0              | 2.169134                | -0.345251 | 3.113348  |
| 5                | 6                | 0              | 1.182091                | -2.169566 | 1.424727  |
| 6                | 1                | 0              | 2.272260                | -2.263692 | 1.449071  |
| 7                | 1                | 0              | 0.803509                | -2.695782 | 2.308406  |
| 8                | 6                | 0              | -0.501558               | -0.511183 | 2.129199  |
| 9                | 1                | 0              | -1.075570               | -1.431259 | 2.000928  |
| 10               | 1                | 0              | -0.384185               | -0.358514 | 3.209038  |
| 11               | 27               | 0              | 0.742843                | -0.027640 | -0.543222 |
| 12               | 6                | 0              | 3.141528                | 0.044002  | 1.218141  |
| 13               | 6                | 0              | 4.447137                | 0.089291  | 1.702008  |
| 14               | 6                | 0              | 3.897666                | -0.055821 | -0.982333 |
| 15               | 6                | 0              | 5.505777                | 0.067109  | 0.791229  |
| 16               | 1                | 0              | 4.632922                | 0.134221  | 2.770322  |
| 17               | 6                | 0              | 5.227742                | -0.014324 | -0.574149 |
| 18               | 1                | 0              | 3.631738                | -0.113936 | -2.033315 |
| 19               | 1                | 0              | 6.531625                | 0.101278  | 1.144192  |
| 20               | 1                | 0              | 6.022071                | -0.047292 | -1.311522 |
| 21               | 6                | 0              | 0.692332                | -2.817733 | 0.152459  |
| 22               | 6                | 0              | 0.480706                | -4.190622 | 0.052911  |
| 23               | 6                | 0              | 0.132350                | -4.739519 | -1.181719 |
| 24               | 1                | 0              | 0.594620                | -4.820781 | 0.928994  |
| 25               | 6                | 0              | 0.209320                | -2.535153 | -2.117568 |
| 26               | 6                | 0              | 0.000686                | -3.897490 | -2.287041 |
| 27               | 1                | 0              | -0.033173               | -5.807867 | -1.278350 |
| 28               | 1                | 0              | 0.108394                | -1.842321 | -2.944106 |
| 29               | 1                | 0              | -0.263774               | -4.283863 | -3.264900 |
| 30               | 7                | 0              | 2.875210                | -0.019241 | -0.106322 |
| 31               | 7                | 0              | 0.546054                | -2.001270 | -0.920644 |
| 32               | 6                | 0              | -1.249180               | 0.659828  | 1.505299  |
| 33               | 1                | 0              | -2.249262               | 0.743330  | 1.946698  |
| 34               | 1                | 0              | -0.725314               | 1.596124  | 1.714894  |
| 35               | 7                | 0              | -1.334828               | 0.504390  | 0.022960  |
| 36               | 6                | 0              | -1.621048               | 1.808259  | -0.615242 |
| 37               | 1                | 0              | -1.879424               | 1.617800  | -1.663240 |
| 38               | 1                | 0              | -2.487021               | 2.301555  | -0.159625 |
| 39               | 6                | 0              | -2.360262               | -0.531576 | -0.401229 |

|    |   |   |           |           |           |
|----|---|---|-----------|-----------|-----------|
| 40 | 1 | 0 | -2.251784 | -0.627476 | -1.485336 |
| 41 | 1 | 0 | -2.051311 | -1.482494 | 0.037297  |
| 42 | 6 | 0 | -3.799112 | -0.232231 | -0.040203 |
| 43 | 6 | 0 | -4.625862 | 0.476769  | -0.925518 |
| 44 | 6 | 0 | -4.343556 | -0.688308 | 1.170982  |
| 45 | 6 | 0 | -5.954506 | 0.746291  | -0.596842 |
| 46 | 1 | 0 | -4.240680 | 0.798826  | -1.890188 |
| 47 | 6 | 0 | -5.671720 | -0.418123 | 1.502627  |
| 48 | 1 | 0 | -3.737350 | -1.283899 | 1.850587  |
| 49 | 6 | 0 | -6.477272 | 0.304940  | 0.620737  |
| 50 | 1 | 0 | -6.584728 | 1.286931  | -1.295842 |
| 51 | 1 | 0 | -6.080689 | -0.783198 | 2.439400  |
| 52 | 1 | 0 | -7.512840 | 0.508793  | 0.873514  |
| 53 | 6 | 0 | -0.413367 | 2.709182  | -0.576782 |
| 54 | 6 | 0 | -0.539891 | 4.096996  | -0.623383 |
| 55 | 6 | 0 | 0.606074  | 4.887096  | -0.674533 |
| 56 | 1 | 0 | -1.528267 | 4.544876  | -0.626786 |
| 57 | 6 | 0 | 1.902844  | 2.872791  | -0.605854 |
| 58 | 6 | 0 | 1.851999  | 4.259444  | -0.669376 |
| 59 | 1 | 0 | 0.528655  | 5.968691  | -0.718888 |
| 60 | 1 | 0 | 2.851558  | 2.354330  | -0.603904 |
| 61 | 1 | 0 | 2.773604  | 4.828883  | -0.713298 |
| 62 | 7 | 0 | 0.794229  | 2.104675  | -0.549906 |
| 63 | 1 | 0 | 0.688496  | 0.309512  | -1.981832 |

-----  
 $\text{Co}^{\text{III}}\text{-H } 2'_A$  (quintet) E(B3LYP/ SDD-6-31G(d,p))= -1466.09032648 hartree

| Center<br>Number | Atomic<br>Number | Atomic<br>Type | Coordinates (Angstroms) |           |           |
|------------------|------------------|----------------|-------------------------|-----------|-----------|
|                  |                  |                | X                       | Y         | Z         |
| 1                | 7                | 0              | 0.842530                | -0.834231 | 1.484348  |
| 2                | 6                | 0              | 1.938100                | -0.079116 | 2.145323  |
| 3                | 1                | 0              | 1.583580                | 0.938262  | 2.346537  |
| 4                | 1                | 0              | 2.206872                | -0.523116 | 3.112566  |
| 5                | 6                | 0              | 1.182443                | -2.278437 | 1.391323  |
| 6                | 1                | 0              | 2.273046                | -2.374831 | 1.389698  |
| 7                | 1                | 0              | 0.823182                | -2.822422 | 2.273113  |
| 8                | 6                | 0              | -0.486343               | -0.616549 | 2.124320  |
| 9                | 1                | 0              | -1.086222               | -1.511215 | 1.946870  |
| 10               | 1                | 0              | -0.385491               | -0.514149 | 3.212281  |
| 11               | 27               | 0              | 0.766932                | 0.079922  | -0.568962 |
| 12               | 6                | 0              | 3.139940                | -0.034570 | 1.222498  |
| 13               | 6                | 0              | 4.455639                | -0.045840 | 1.679036  |
| 14               | 6                | 0              | 3.853099                | 0.024577  | -0.997802 |

|    |   |   |           |           |           |
|----|---|---|-----------|-----------|-----------|
| 15 | 6 | 0 | 5.495611  | -0.014604 | 0.747376  |
| 16 | 1 | 0 | 4.662347  | -0.086994 | 2.743589  |
| 17 | 6 | 0 | 5.190558  | 0.013140  | -0.614569 |
| 18 | 1 | 0 | 3.564191  | 0.046899  | -2.044469 |
| 19 | 1 | 0 | 6.528534  | -0.024783 | 1.080701  |
| 20 | 1 | 0 | 5.969609  | 0.022222  | -1.368646 |
| 21 | 6 | 0 | 0.660511  | -2.905162 | 0.118579  |
| 22 | 6 | 0 | 0.411591  | -4.274107 | 0.032550  |
| 23 | 6 | 0 | 0.041099  | -4.822364 | -1.195512 |
| 24 | 1 | 0 | 0.515188  | -4.900799 | 0.912665  |
| 25 | 6 | 0 | 0.169459  | -2.622578 | -2.134595 |
| 26 | 6 | 0 | -0.074767 | -3.980970 | -2.301989 |
| 27 | 1 | 0 | -0.153410 | -5.886367 | -1.285178 |
| 28 | 1 | 0 | 0.077530  | -1.928796 | -2.963478 |
| 29 | 1 | 0 | -0.355769 | -4.362773 | -3.277136 |
| 30 | 7 | 0 | 2.850811  | 0.009662  | -0.097017 |
| 31 | 7 | 0 | 0.528251  | -2.088680 | -0.949140 |
| 32 | 6 | 0 | -1.193294 | 0.609456  | 1.552006  |
| 33 | 1 | 0 | -2.192540 | 0.701085  | 1.993337  |
| 34 | 1 | 0 | -0.644274 | 1.520826  | 1.806701  |
| 35 | 7 | 0 | -1.289894 | 0.537612  | 0.063066  |
| 36 | 6 | 0 | -1.608449 | 1.873498  | -0.501120 |
| 37 | 1 | 0 | -1.917729 | 1.727909  | -1.541826 |
| 38 | 1 | 0 | -2.457413 | 2.330612  | 0.018541  |
| 39 | 6 | 0 | -2.307767 | -0.488755 | -0.414282 |
| 40 | 1 | 0 | -2.187757 | -0.536460 | -1.499594 |
| 41 | 1 | 0 | -1.994456 | -1.454072 | -0.015317 |
| 42 | 6 | 0 | -3.749082 | -0.207082 | -0.050525 |
| 43 | 6 | 0 | -4.580132 | 0.505115  | -0.929460 |
| 44 | 6 | 0 | -4.294132 | -0.687334 | 1.151394  |
| 45 | 6 | 0 | -5.913270 | 0.754729  | -0.603546 |
| 46 | 1 | 0 | -4.194803 | 0.843916  | -1.888322 |
| 47 | 6 | 0 | -5.626676 | -0.436651 | 1.480356  |
| 48 | 1 | 0 | -3.686286 | -1.288298 | 1.824582  |
| 49 | 6 | 0 | -6.436355 | 0.290307  | 0.605233  |
| 50 | 1 | 0 | -6.546455 | 1.297513  | -1.298174 |
| 51 | 1 | 0 | -6.036150 | -0.820689 | 2.409274  |
| 52 | 1 | 0 | -7.475344 | 0.478612  | 0.856015  |
| 53 | 6 | 0 | -0.416325 | 2.798915  | -0.491568 |
| 54 | 6 | 0 | -0.573241 | 4.183853  | -0.504872 |
| 55 | 6 | 0 | 0.555411  | 4.996117  | -0.600683 |
| 56 | 1 | 0 | -1.567342 | 4.615210  | -0.449005 |
| 57 | 6 | 0 | 1.897695  | 3.013544  | -0.634005 |
| 58 | 6 | 0 | 1.815782  | 4.398059  | -0.671125 |

|    |   |   |          |          |           |
|----|---|---|----------|----------|-----------|
| 59 | 1 | 0 | 0.454116 | 6.076624 | -0.619682 |
| 60 | 1 | 0 | 2.855515 | 2.510345 | -0.678487 |
| 61 | 1 | 0 | 2.719662 | 4.991594 | -0.749473 |
| 62 | 7 | 0 | 0.805815 | 2.221736 | -0.541930 |
| 63 | 1 | 0 | 0.495660 | 0.050394 | -2.227022 |

-----  
 Co<sup>III</sup>-H 2'<sub>B</sub> (singlet) E(B3LYP/ SDD-6-31G(d,p))= -1466.15003768 hartree  
 -----

| Center<br>Number | Atomic<br>Number | Atomic<br>Type | Coordinates (Angstroms) |           |           |
|------------------|------------------|----------------|-------------------------|-----------|-----------|
|                  |                  |                | X                       | Y         | Z         |
| 1                | 7                | 0              | 1.214747                | 1.409926  | -1.495221 |
| 2                | 6                | 0              | 2.501375                | 1.028905  | -2.151481 |
| 3                | 1                | 0              | 2.438198                | 1.139414  | -3.239580 |
| 4                | 1                | 0              | 3.276036                | 1.717506  | -1.798783 |
| 5                | 6                | 0              | 1.148630                | 2.876228  | -1.209777 |
| 6                | 1                | 0              | 2.159789                | 3.219503  | -0.970351 |
| 7                | 1                | 0              | 0.807720                | 3.438659  | -2.086229 |
| 8                | 6                | 0              | 0.013811                | 0.968304  | -2.310763 |
| 9                | 1                | 0              | -0.789960               | 1.677413  | -2.104312 |
| 10               | 1                | 0              | 0.244380                | 1.045642  | -3.378725 |
| 11               | 27               | 0              | 1.103596                | 0.464938  | 0.239151  |
| 12               | 6                | 0              | 2.914725                | -0.361707 | -1.752118 |
| 13               | 6                | 0              | 3.849330                | -1.095403 | -2.478390 |
| 14               | 6                | 0              | 2.852201                | -1.981429 | -0.088545 |
| 15               | 6                | 0              | 4.299043                | -2.313694 | -1.972697 |
| 16               | 1                | 0              | 4.228742                | -0.706786 | -3.417869 |
| 17               | 6                | 0              | 3.797591                | -2.756447 | -0.748399 |
| 18               | 1                | 0              | 2.446751                | -2.295927 | 0.863858  |
| 19               | 1                | 0              | 5.032037                | -2.899636 | -2.517644 |
| 20               | 1                | 0              | 4.129240                | -3.688568 | -0.305025 |
| 21               | 6                | 0              | 0.273441                | 3.121627  | -0.007571 |
| 22               | 6                | 0              | -0.335105               | 4.348501  | 0.242483  |
| 23               | 6                | 0              | -1.028103               | 4.532479  | 1.438847  |
| 24               | 1                | 0              | -0.254248               | 5.150105  | -0.484455 |
| 25               | 6                | 0              | -0.484931               | 2.270269  | 2.021658  |
| 26               | 6                | 0              | -1.096228               | 3.475501  | 2.346326  |
| 27               | 1                | 0              | -1.502658               | 5.483374  | 1.658445  |
| 28               | 1                | 0              | -0.528377               | 1.423742  | 2.695022  |
| 29               | 1                | 0              | -1.618598               | 3.574458  | 3.291199  |
| 30               | 7                | 0              | 2.398651                | -0.809642 | -0.582568 |
| 31               | 7                | 0              | 0.184063                | 2.087996  | 0.865822  |
| 32               | 6                | 0              | -0.437769               | -0.446541 | -1.949256 |
| 33               | 1                | 0              | -1.341147               | -0.702214 | -2.513425 |

|    |   |   |           |           |           |
|----|---|---|-----------|-----------|-----------|
| 34 | 1 | 0 | 0.326987  | -1.178192 | -2.215451 |
| 35 | 7 | 0 | -0.662794 | -0.505304 | -0.480695 |
| 36 | 6 | 0 | -0.538179 | -1.855674 | 0.123630  |
| 37 | 1 | 0 | -1.478399 | -2.413582 | 0.080674  |
| 38 | 1 | 0 | 0.196745  | -2.428319 | -0.450906 |
| 39 | 6 | 0 | -1.989425 | 0.120769  | -0.075070 |
| 40 | 1 | 0 | -1.998125 | 0.119960  | 1.017428  |
| 41 | 1 | 0 | -1.961805 | 1.164705  | -0.389707 |
| 42 | 6 | 0 | -3.236381 | -0.550531 | -0.606199 |
| 43 | 6 | 0 | -3.895518 | -1.537056 | 0.145072  |
| 44 | 6 | 0 | -3.788920 | -0.165698 | -1.838739 |
| 45 | 6 | 0 | -5.052339 | -2.149302 | -0.338944 |
| 46 | 1 | 0 | -3.523756 | -1.806348 | 1.131465  |
| 47 | 6 | 0 | -4.944673 | -0.777159 | -2.325405 |
| 48 | 1 | 0 | -3.335319 | 0.640142  | -2.411971 |
| 49 | 6 | 0 | -5.573293 | -1.776265 | -1.579381 |
| 50 | 1 | 0 | -5.554699 | -2.904333 | 0.257402  |
| 51 | 1 | 0 | -5.362689 | -0.463747 | -3.276753 |
| 52 | 1 | 0 | -6.476191 | -2.247635 | -1.953994 |
| 53 | 6 | 0 | -0.048906 | -1.718793 | 1.552382  |
| 54 | 6 | 0 | -0.367431 | -2.631176 | 2.555595  |
| 55 | 6 | 0 | 0.190872  | -2.476513 | 3.825978  |
| 56 | 1 | 0 | -1.042161 | -3.453392 | 2.340682  |
| 57 | 6 | 0 | 1.330315  | -0.525474 | 3.023129  |
| 58 | 6 | 0 | 1.056287  | -1.407711 | 4.062898  |
| 59 | 1 | 0 | -0.047171 | -3.179754 | 4.617750  |
| 60 | 1 | 0 | 1.997920  | 0.319070  | 3.151513  |
| 61 | 1 | 0 | 1.514712  | -1.254572 | 5.033474  |
| 62 | 7 | 0 | 0.787763  | -0.674018 | 1.796604  |
| 63 | 1 | 0 | 2.299431  | 1.097207  | 0.760028  |

-----  
 $\text{Co}^{\text{III}}\text{-H } 2'_B$  (triplet) E(B3LYP/ SDD-6-31G(d,p))= -1466.12835902 hartree  
 -----

| Center<br>Number | Atomic<br>Number | Atomic<br>Type | Coordinates (Angstroms) |          |           |
|------------------|------------------|----------------|-------------------------|----------|-----------|
|                  |                  |                | X                       | Y        | Z         |
| 1                | 7                | 0              | 1.323903                | 1.654920 | -1.262113 |
| 2                | 6                | 0              | 2.537056                | 1.271876 | -2.022679 |
| 3                | 1                | 0              | 2.384962                | 1.398981 | -3.101548 |
| 4                | 1                | 0              | 3.353498                | 1.948623 | -1.749198 |
| 5                | 6                | 0              | 1.416378                | 3.017058 | -0.684542 |
| 6                | 1                | 0              | 2.463656                | 3.210837 | -0.429410 |
| 7                | 1                | 0              | 1.115447                | 3.789896 | -1.403396 |
| 8                | 6                | 0              | 0.073357                | 1.482864 | -2.064305 |

|    |    |   |           |           |           |
|----|----|---|-----------|-----------|-----------|
| 9  | 1  | 0 | -0.680535 | 2.157781  | -1.652971 |
| 10 | 1  | 0 | 0.237317  | 1.790301  | -3.105117 |
| 11 | 27 | 0 | 1.060697  | 0.243079  | 0.468543  |
| 12 | 6  | 0 | 3.009475  | -0.136823 | -1.729794 |
| 13 | 6  | 0 | 3.945208  | -0.763989 | -2.554210 |
| 14 | 6  | 0 | 3.058104  | -1.928630 | -0.243681 |
| 15 | 6  | 0 | 4.446909  | -2.011511 | -2.192248 |
| 16 | 1  | 0 | 4.281393  | -0.270203 | -3.460552 |
| 17 | 6  | 0 | 3.999231  | -2.602559 | -1.008024 |
| 18 | 1  | 0 | 2.683419  | -2.343945 | 0.684183  |
| 19 | 1  | 0 | 5.179807  | -2.511167 | -2.817671 |
| 20 | 1  | 0 | 4.372494  | -3.566082 | -0.679809 |
| 21 | 6  | 0 | 0.609073  | 3.137883  | 0.590092  |
| 22 | 6  | 0 | 0.124006  | 4.363955  | 1.042903  |
| 23 | 6  | 0 | -0.517274 | 4.431158  | 2.279263  |
| 24 | 1  | 0 | 0.257325  | 5.253641  | 0.435909  |
| 25 | 6  | 0 | -0.167147 | 2.074257  | 2.515160  |
| 26 | 6  | 0 | -0.662302 | 3.264195  | 3.031772  |
| 27 | 1  | 0 | -0.895511 | 5.378466  | 2.649992  |
| 28 | 1  | 0 | -0.261623 | 1.141127  | 3.059398  |
| 29 | 1  | 0 | -1.150040 | 3.271326  | 4.000007  |
| 30 | 7  | 0 | 2.559650  | -0.724584 | -0.603276 |
| 31 | 7  | 0 | 0.447895  | 2.010068  | 1.315912  |
| 32 | 6  | 0 | -0.435250 | 0.043623  | -2.022489 |
| 33 | 1  | 0 | -1.344708 | -0.052057 | -2.625156 |
| 34 | 1  | 0 | 0.309025  | -0.633017 | -2.450719 |
| 35 | 7  | 0 | -0.674884 | -0.367664 | -0.611079 |
| 36 | 6  | 0 | -0.673461 | -1.846255 | -0.432055 |
| 37 | 1  | 0 | -1.617309 | -2.291583 | -0.762247 |
| 38 | 1  | 0 | 0.119316  | -2.262632 | -1.063535 |
| 39 | 6  | 0 | -1.958202 | 0.231204  | -0.040331 |
| 40 | 1  | 0 | -1.982959 | -0.061629 | 1.012394  |
| 41 | 1  | 0 | -1.838510 | 1.315034  | -0.065189 |
| 42 | 6  | 0 | -3.245335 | -0.170240 | -0.724548 |
| 43 | 6  | 0 | -3.983815 | -1.274500 | -0.269389 |
| 44 | 6  | 0 | -3.751377 | 0.580962  | -1.797691 |
| 45 | 6  | 0 | -5.178955 | -1.637997 | -0.891060 |
| 46 | 1  | 0 | -3.640345 | -1.835103 | 0.597296  |
| 47 | 6  | 0 | -4.945696 | 0.218870  | -2.421131 |
| 48 | 1  | 0 | -3.227032 | 1.473102  | -2.133143 |
| 49 | 6  | 0 | -5.657377 | -0.895840 | -1.972775 |
| 50 | 1  | 0 | -5.743704 | -2.488600 | -0.522773 |
| 51 | 1  | 0 | -5.327711 | 0.813301  | -3.244966 |
| 52 | 1  | 0 | -6.590135 | -1.174059 | -2.452710 |

|    |   |   |           |           |          |
|----|---|---|-----------|-----------|----------|
| 53 | 6 | 0 | -0.382801 | -2.200415 | 1.013048 |
| 54 | 6 | 0 | -0.900245 | -3.340595 | 1.624311 |
| 55 | 6 | 0 | -0.536332 | -3.633519 | 2.939704 |
| 56 | 1 | 0 | -1.576527 | -3.988529 | 1.076404 |
| 57 | 6 | 0 | 0.812959  | -1.653711 | 2.944107 |
| 58 | 6 | 0 | 0.335672  | -2.775302 | 3.612181 |
| 59 | 1 | 0 | -0.929688 | -4.516903 | 3.432786 |
| 60 | 1 | 0 | 1.498377  | -0.961396 | 3.421855 |
| 61 | 1 | 0 | 0.642571  | -2.967728 | 4.634164 |
| 62 | 7 | 0 | 0.462457  | -1.367698 | 1.672043 |
| 63 | 1 | 0 | 2.204600  | 0.507678  | 1.355122 |

-----  
 $\text{Co}^{\text{III}}\text{-H } 2'_{\text{B}}$  (quintet) E(B3LYP/ SDD-6-31G(d,p))= -1466.08466714 hartree  
 -----

| Center<br>Number | Atomic<br>Number | Atomic<br>Type | Coordinates (Angstroms) |           |           |
|------------------|------------------|----------------|-------------------------|-----------|-----------|
|                  |                  |                | X                       | Y         | Z         |
| 1                | 7                | 0              | 1.403131                | 1.590129  | -1.221664 |
| 2                | 6                | 0              | 2.658642                | 1.192857  | -1.923014 |
| 3                | 1                | 0              | 2.565759                | 1.354005  | -3.003336 |
| 4                | 1                | 0              | 3.463905                | 1.851564  | -1.581134 |
| 5                | 6                | 0              | 1.456040                | 3.000389  | -0.736114 |
| 6                | 1                | 0              | 2.479328                | 3.204938  | -0.402978 |
| 7                | 1                | 0              | 1.236522                | 3.706239  | -1.546373 |
| 8                | 6                | 0              | 0.178534                | 1.360029  | -2.064711 |
| 9                | 1                | 0              | -0.590740               | 2.051576  | -1.714987 |
| 10               | 1                | 0              | 0.392024                | 1.619681  | -3.108445 |
| 11               | 27               | 0              | 1.159288                | 0.345307  | 0.528434  |
| 12               | 6                | 0              | 3.091702                | -0.233089 | -1.638504 |
| 13               | 6                | 0              | 4.034018                | -0.868477 | -2.446960 |
| 14               | 6                | 0              | 3.050033                | -2.047591 | -0.178148 |
| 15               | 6                | 0              | 4.495834                | -2.132884 | -2.084768 |
| 16               | 1                | 0              | 4.406926                | -0.374784 | -3.338812 |
| 17               | 6                | 0              | 4.000313                | -2.731279 | -0.923314 |
| 18               | 1                | 0              | 2.634137                | -2.468252 | 0.730631  |
| 19               | 1                | 0              | 5.234001                | -2.641792 | -2.696498 |
| 20               | 1                | 0              | 4.341916                | -3.708614 | -0.601517 |
| 21               | 6                | 0              | 0.527693                | 3.231262  | 0.441150  |
| 22               | 6                | 0              | 0.021713                | 4.495541  | 0.736766  |
| 23               | 6                | 0              | -0.735116               | 4.668477  | 1.896392  |
| 24               | 1                | 0              | 0.224904                | 5.331884  | 0.075642  |
| 25               | 6                | 0              | -0.452032               | 2.335976  | 2.358042  |
| 26               | 6                | 0              | -0.973237               | 3.570087  | 2.725303  |
| 27               | 1                | 0              | -1.132569               | 5.646410  | 2.148856  |



|    |   |   |           |           |           |
|----|---|---|-----------|-----------|-----------|
| 28 | 1 | 0 | -0.613768 | 1.450149  | 2.963108  |
| 29 | 1 | 0 | -1.553557 | 3.664888  | 3.636188  |
| 30 | 7 | 0 | 2.596681  | -0.825006 | -0.530947 |
| 31 | 7 | 0 | 0.278686  | 2.167886  | 1.237936  |
| 32 | 6 | 0 | -0.333012 | -0.077793 | -1.977546 |
| 33 | 1 | 0 | -1.210504 | -0.192157 | -2.623765 |
| 34 | 1 | 0 | 0.426017  | -0.773763 | -2.343187 |
| 35 | 7 | 0 | -0.648885 | -0.432269 | -0.566577 |
| 36 | 6 | 0 | -0.631960 | -1.894524 | -0.322328 |
| 37 | 1 | 0 | -1.555900 | -2.372262 | -0.664176 |
| 38 | 1 | 0 | 0.190160  | -2.328397 | -0.901677 |
| 39 | 6 | 0 | -1.960855 | 0.176076  | -0.090680 |
| 40 | 1 | 0 | -2.026638 | -0.053860 | 0.975459  |
| 41 | 1 | 0 | -1.857534 | 1.258666  | -0.174780 |
| 42 | 6 | 0 | -3.210853 | -0.285934 | -0.805712 |
| 43 | 6 | 0 | -3.954972 | -1.372008 | -0.317393 |
| 44 | 6 | 0 | -3.677070 | 0.390306  | -1.944690 |
| 45 | 6 | 0 | -5.115825 | -1.790933 | -0.968458 |
| 46 | 1 | 0 | -3.643342 | -1.874124 | 0.595818  |
| 47 | 6 | 0 | -4.836563 | -0.027783 | -2.598312 |
| 48 | 1 | 0 | -3.151226 | 1.270660  | -2.308247 |
| 49 | 6 | 0 | -5.553662 | -1.124037 | -2.114525 |
| 50 | 1 | 0 | -5.685906 | -2.626188 | -0.574133 |
| 51 | 1 | 0 | -5.188387 | 0.509691  | -3.473172 |
| 52 | 1 | 0 | -6.459856 | -1.445531 | -2.617756 |
| 53 | 6 | 0 | -0.394870 | -2.164237 | 1.147854  |
| 54 | 6 | 0 | -0.929430 | -3.271424 | 1.803675  |
| 55 | 6 | 0 | -0.628548 | -3.475800 | 3.151354  |
| 56 | 1 | 0 | -1.571599 | -3.960388 | 1.264607  |
| 57 | 6 | 0 | 0.695268  | -1.479197 | 3.089521  |
| 58 | 6 | 0 | 0.196777  | -2.561724 | 3.806761  |
| 59 | 1 | 0 | -1.035345 | -4.331734 | 3.680535  |
| 60 | 1 | 0 | 1.350167  | -0.748540 | 3.552359  |
| 61 | 1 | 0 | 0.454438  | -2.680453 | 4.853319  |
| 62 | 7 | 0 | 0.407107  | -1.281705 | 1.786858  |
| 63 | 1 | 0 | 2.207473  | 0.510251  | 1.861649  |

-----  
Co<sup>III</sup>-H 2'<sub>c</sub>(singlet) E(B3LYP/ SDD-6-31G(d,p))= -1466.14742538 hartree  
-----

| Center<br>Number | Atomic<br>Number | Atomic<br>Type | Coordinates (Angstroms) |           |           |
|------------------|------------------|----------------|-------------------------|-----------|-----------|
|                  |                  |                | X                       | Y         | Z         |
| 1                | 7                | 0              | 0.994308                | -1.964252 | -0.094651 |
| 2                | 6                | 0              | 1.896117                | -2.159872 | 1.095788  |

|    |    |   |           |           |           |
|----|----|---|-----------|-----------|-----------|
| 3  | 1  | 0 | 1.620213  | -3.079484 | 1.622251  |
| 4  | 1  | 0 | 2.916178  | -2.309841 | 0.728504  |
| 5  | 6  | 0 | 1.705874  | -2.390521 | -1.340849 |
| 6  | 1  | 0 | 2.156876  | -3.383582 | -1.230284 |
| 7  | 1  | 0 | 0.973557  | -2.437201 | -2.151587 |
| 8  | 6  | 0 | -0.341687 | -2.615971 | 0.120125  |
| 9  | 1  | 0 | -0.771854 | -2.828725 | -0.859855 |
| 10 | 1  | 0 | -0.231476 | -3.572102 | 0.642880  |
| 11 | 27 | 0 | 0.620181  | -0.040914 | -0.385891 |
| 12 | 6  | 0 | 1.915401  | -0.980516 | 2.036513  |
| 13 | 6  | 0 | 2.494011  | -1.074957 | 3.303078  |
| 14 | 6  | 0 | 1.530471  | 1.287463  | 2.316579  |
| 15 | 6  | 0 | 2.591499  | 0.071974  | 4.087607  |
| 16 | 1  | 0 | 2.869032  | -2.028139 | 3.662214  |
| 17 | 6  | 0 | 2.109561  | 1.280176  | 3.579344  |
| 18 | 1  | 0 | 1.134192  | 2.203158  | 1.891099  |
| 19 | 1  | 0 | 3.039220  | 0.025647  | 5.075165  |
| 20 | 1  | 0 | 2.174592  | 2.199328  | 4.150775  |
| 21 | 6  | 0 | 2.750126  | -1.337098 | -1.637287 |
| 22 | 6  | 0 | 3.946362  | -1.602793 | -2.295447 |
| 23 | 6  | 0 | 4.855070  | -0.562813 | -2.499958 |
| 24 | 1  | 0 | 4.164293  | -2.608826 | -2.638877 |
| 25 | 6  | 0 | 3.340129  | 0.897441  | -1.349854 |
| 26 | 6  | 0 | 4.552183  | 0.705228  | -2.005445 |
| 27 | 1  | 0 | 5.790538  | -0.745834 | -3.018661 |
| 28 | 1  | 0 | 3.077842  | 1.861535  | -0.930461 |
| 29 | 1  | 0 | 5.241289  | 1.534892  | -2.116245 |
| 30 | 7  | 0 | 1.421857  | 0.177901  | 1.556677  |
| 31 | 7  | 0 | 2.443436  | -0.092421 | -1.188604 |
| 32 | 6  | 0 | -1.233776 | -1.657225 | 0.908156  |
| 33 | 1  | 0 | -2.236376 | -2.072920 | 1.043695  |
| 34 | 1  | 0 | -0.816994 | -1.469311 | 1.900580  |
| 35 | 7  | 0 | -1.280489 | -0.361133 | 0.163150  |
| 36 | 6  | 0 | -1.610155 | 0.826796  | 1.001359  |
| 37 | 1  | 0 | -2.685235 | 0.900764  | 1.187540  |
| 38 | 1  | 0 | -1.111843 | 0.720349  | 1.968623  |
| 39 | 6  | 0 | -2.256518 | -0.440789 | -1.027364 |
| 40 | 1  | 0 | -2.123788 | 0.489342  | -1.580992 |
| 41 | 1  | 0 | -1.893809 | -1.242373 | -1.670355 |
| 42 | 6  | 0 | -3.709255 | -0.654746 | -0.674410 |
| 43 | 6  | 0 | -4.572247 | 0.440323  | -0.502265 |
| 44 | 6  | 0 | -4.241546 | -1.950902 | -0.573740 |
| 45 | 6  | 0 | -5.920156 | 0.246109  | -0.199698 |
| 46 | 1  | 0 | -4.196961 | 1.452033  | -0.639572 |

|    |   |   |           |           |           |
|----|---|---|-----------|-----------|-----------|
| 47 | 6 | 0 | -5.589014 | -2.147426 | -0.270531 |
| 48 | 1 | 0 | -3.610612 | -2.815723 | -0.767318 |
| 49 | 6 | 0 | -6.428208 | -1.048633 | -0.074941 |
| 50 | 1 | 0 | -6.576474 | 1.102025  | -0.078436 |
| 51 | 1 | 0 | -5.986926 | -3.154987 | -0.204161 |
| 52 | 1 | 0 | -7.478241 | -1.200844 | 0.153222  |
| 53 | 6 | 0 | -1.095511 | 2.044086  | 0.264521  |
| 54 | 6 | 0 | -1.690807 | 3.299868  | 0.342157  |
| 55 | 6 | 0 | -1.171761 | 4.349558  | -0.417990 |
| 56 | 1 | 0 | -2.557331 | 3.446969  | 0.978516  |
| 57 | 6 | 0 | 0.462295  | 2.824704  | -1.286882 |
| 58 | 6 | 0 | -0.086597 | 4.102388  | -1.258450 |
| 59 | 1 | 0 | -1.623031 | 5.335553  | -0.372871 |
| 60 | 1 | 0 | 1.286764  | 2.583984  | -1.946512 |
| 61 | 1 | 0 | 0.326270  | 4.878755  | -1.892690 |
| 62 | 7 | 0 | -0.008139 | 1.821612  | -0.521221 |
| 63 | 1 | 0 | 0.177215  | -0.262827 | -1.735278 |

-----  
 Co<sup>III</sup>-H 2'<sub>c</sub> (triplet) E(B3LYP/ SDD-6-31G(d,p))= -1466.12612230 hartree  
 -----

| Center<br>Number | Atomic<br>Number | Atomic<br>Type | Coordinates (Angstroms) |           |           |
|------------------|------------------|----------------|-------------------------|-----------|-----------|
|                  |                  |                | X                       | Y         | Z         |
| 1                | 7                | 0              | 1.079933                | -1.932092 | 0.398654  |
| 2                | 6                | 0              | 2.003962                | -1.839830 | 1.561575  |
| 3                | 1                | 0              | 1.783956                | -2.626147 | 2.293858  |
| 4                | 1                | 0              | 3.022979                | -2.029531 | 1.206113  |
| 5                | 6                | 0              | 1.722954                | -2.643933 | -0.732215 |
| 6                | 1                | 0              | 2.178947                | -3.592593 | -0.421156 |
| 7                | 1                | 0              | 0.947979                | -2.883552 | -1.468037 |
| 8                | 6                | 0              | -0.256833               | -2.480584 | 0.763920  |
| 9                | 1                | 0              | -0.679697               | -2.956348 | -0.123156 |
| 10               | 1                | 0              | -0.168176               | -3.260577 | 1.529922  |
| 11               | 27               | 0              | 0.755558                | 0.129149  | -0.351299 |
| 12               | 6                | 0              | 2.010533                | -0.484884 | 2.235930  |
| 13               | 6                | 0              | 2.529406                | -0.327401 | 3.521551  |
| 14               | 6                | 0              | 1.658444                | 1.807895  | 2.052114  |
| 15               | 6                | 0              | 2.619217                | 0.950530  | 4.069756  |
| 16               | 1                | 0              | 2.864969                | -1.195520 | 4.079923  |
| 17               | 6                | 0              | 2.181646                | 2.041964  | 3.316407  |
| 18               | 1                | 0              | 1.294468                | 2.623261  | 1.436850  |
| 19               | 1                | 0              | 3.023838                | 1.092726  | 5.066819  |
| 20               | 1                | 0              | 2.237321                | 3.054098  | 3.701010  |
| 21               | 6                | 0              | 2.753687                | -1.747953 | -1.385115 |

|    |   |   |           |           |           |
|----|---|---|-----------|-----------|-----------|
| 22 | 6 | 0 | 3.892179  | -2.246586 | -2.013992 |
| 23 | 6 | 0 | 4.771001  | -1.360619 | -2.637648 |
| 24 | 1 | 0 | 4.083626  | -3.314751 | -2.015532 |
| 25 | 6 | 0 | 3.340843  | 0.433886  | -1.952790 |
| 26 | 6 | 0 | 4.492135  | 0.006060  | -2.602823 |
| 27 | 1 | 0 | 5.660766  | -1.730575 | -3.136896 |
| 28 | 1 | 0 | 3.091873  | 1.487966  | -1.897463 |
| 29 | 1 | 0 | 5.151081  | 0.731148  | -3.066963 |
| 30 | 7 | 0 | 1.568216  | 0.570150  | 1.516661  |
| 31 | 7 | 0 | 2.488845  | -0.422660 | -1.355800 |
| 32 | 6 | 0 | -1.187717 | -1.372936 | 1.258903  |
| 33 | 1 | 0 | -2.171015 | -1.790598 | 1.499458  |
| 34 | 1 | 0 | -0.790924 | -0.928319 | 2.175008  |
| 35 | 7 | 0 | -1.296255 | -0.300409 | 0.233729  |
| 36 | 6 | 0 | -1.724657 | 0.998833  | 0.815154  |
| 37 | 1 | 0 | -2.806441 | 1.021133  | 0.980601  |
| 38 | 1 | 0 | -1.245033 | 1.111136  | 1.793599  |
| 39 | 6 | 0 | -2.207327 | -0.692410 | -0.930319 |
| 40 | 1 | 0 | -2.134188 | 0.124408  | -1.651978 |
| 41 | 1 | 0 | -1.754151 | -1.568491 | -1.398168 |
| 42 | 6 | 0 | -3.652557 | -0.965325 | -0.585400 |
| 43 | 6 | 0 | -4.610278 | 0.059363  | -0.659086 |
| 44 | 6 | 0 | -4.077490 | -2.257217 | -0.234285 |
| 45 | 6 | 0 | -5.948862 | -0.191567 | -0.355896 |
| 46 | 1 | 0 | -4.314580 | 1.052874  | -0.989007 |
| 47 | 6 | 0 | -5.415037 | -2.510320 | 0.070356  |
| 48 | 1 | 0 | -3.367701 | -3.081711 | -0.228944 |
| 49 | 6 | 0 | -6.351296 | -1.475514 | 0.017210  |
| 50 | 1 | 0 | -6.679216 | 0.608223  | -0.426815 |
| 51 | 1 | 0 | -5.729167 | -3.515647 | 0.332348  |
| 52 | 1 | 0 | -7.393484 | -1.673583 | 0.246173  |
| 53 | 6 | 0 | -1.300977 | 2.147929  | -0.078450 |
| 54 | 6 | 0 | -2.065091 | 3.305260  | -0.216365 |
| 55 | 6 | 0 | -1.599319 | 4.339156  | -1.029335 |
| 56 | 1 | 0 | -3.012847 | 3.389529  | 0.305323  |
| 57 | 6 | 0 | 0.323178  | 2.996937  | -1.517178 |
| 58 | 6 | 0 | -0.383804 | 4.180284  | -1.695924 |
| 59 | 1 | 0 | -2.181199 | 5.247320  | -1.150194 |
| 60 | 1 | 0 | 1.262108  | 2.826954  | -2.032476 |
| 61 | 1 | 0 | 0.008654  | 4.950634  | -2.350182 |
| 62 | 7 | 0 | -0.115215 | 2.006633  | -0.714709 |
| 63 | 1 | 0 | 0.228884  | -0.137950 | -1.691048 |

-----  
Co<sup>III</sup>-H 2'<sub>c</sub>(quintet) E(B3LYP/ SDD-6-31G(d,p))= -1466.08239764 hartree

| Center<br>Number | Atomic<br>Number | Atomic<br>Type | Coordinates (Angstroms) |           |           |
|------------------|------------------|----------------|-------------------------|-----------|-----------|
|                  |                  |                | X                       | Y         | Z         |
| 1                | 7                | 0              | 1.048468                | -1.821496 | 0.568213  |
| 2                | 6                | 0              | 1.964057                | -1.572702 | 1.721989  |
| 3                | 1                | 0              | 1.632520                | -2.145687 | 2.595195  |
| 4                | 1                | 0              | 2.957522                | -1.957153 | 1.467258  |
| 5                | 6                | 0              | 1.713078                | -2.684156 | -0.450930 |
| 6                | 1                | 0              | 2.080722                | -3.617419 | -0.006274 |
| 7                | 1                | 0              | 0.960972                | -2.956392 | -1.200208 |
| 8                | 6                | 0              | -0.265762               | -2.382811 | 1.002447  |
| 9                | 1                | 0              | -0.693803               | -2.928359 | 0.159077  |
| 10               | 1                | 0              | -0.137434               | -3.107529 | 1.815449  |
| 11               | 27               | 0              | 0.615754                | 0.099905  | -0.456698 |
| 12               | 6                | 0              | 2.127193                | -0.115544 | 2.102331  |
| 13               | 6                | 0              | 2.763600                | 0.231249  | 3.295841  |
| 14               | 6                | 0              | 1.919948                | 2.124161  | 1.512277  |
| 15               | 6                | 0              | 2.985584                | 1.575388  | 3.583872  |
| 16               | 1                | 0              | 3.086821                | -0.544288 | 3.983224  |
| 17               | 6                | 0              | 2.560597                | 2.542754  | 2.669607  |
| 18               | 1                | 0              | 1.560334                | 2.838672  | 0.780619  |
| 19               | 1                | 0              | 3.482574                | 1.864556  | 4.504446  |
| 20               | 1                | 0              | 2.716993                | 3.600155  | 2.851040  |
| 21               | 6                | 0              | 2.834116                | -1.932045 | -1.131967 |
| 22               | 6                | 0              | 3.998947                | -2.554860 | -1.576947 |
| 23               | 6                | 0              | 4.956958                | -1.794703 | -2.249996 |
| 24               | 1                | 0              | 4.150565                | -3.615386 | -1.403354 |
| 25               | 6                | 0              | 3.540035                | 0.117184  | -1.973431 |
| 26               | 6                | 0              | 4.725682                | -0.433440 | -2.450025 |
| 27               | 1                | 0              | 5.869384                | -2.258586 | -2.610709 |
| 28               | 1                | 0              | 3.314083                | 1.169559  | -2.114274 |
| 29               | 1                | 0              | 5.444661                | 0.192438  | -2.966774 |
| 30               | 7                | 0              | 1.702654                | 0.819921  | 1.229888  |
| 31               | 7                | 0              | 2.619995                | -0.615433 | -1.323977 |
| 32               | 6                | 0              | -1.205013               | -1.263382 | 1.440442  |
| 33               | 1                | 0              | -2.178988               | -1.673049 | 1.728416  |
| 34               | 1                | 0              | -0.794918               | -0.749354 | 2.314638  |
| 35               | 7                | 0              | -1.346591               | -0.262302 | 0.345896  |
| 36               | 6                | 0              | -1.830677               | 1.050169  | 0.854834  |
| 37               | 1                | 0              | -2.904500               | 1.018548  | 1.065291  |
| 38               | 1                | 0              | -1.318600               | 1.254096  | 1.801958  |
| 39               | 6                | 0              | -2.226044               | -0.761101 | -0.803656 |
| 40               | 1                | 0              | -2.190308               | 0.017342  | -1.569177 |

|    |   |   |           |           |           |
|----|---|---|-----------|-----------|-----------|
| 41 | 1 | 0 | -1.728387 | -1.638015 | -1.224731 |
| 42 | 6 | 0 | -3.658087 | -1.088140 | -0.446824 |
| 43 | 6 | 0 | -4.660957 | -0.112088 | -0.561968 |
| 44 | 6 | 0 | -4.019472 | -2.380883 | -0.034627 |
| 45 | 6 | 0 | -5.985732 | -0.411886 | -0.242806 |
| 46 | 1 | 0 | -4.411914 | 0.878904  | -0.934649 |
| 47 | 6 | 0 | -5.343586 | -2.681962 | 0.285172  |
| 48 | 1 | 0 | -3.271175 | -3.169342 | 0.008145  |
| 49 | 6 | 0 | -6.327113 | -1.695379 | 0.188280  |
| 50 | 1 | 0 | -6.752611 | 0.349234  | -0.345978 |
| 51 | 1 | 0 | -5.609888 | -3.687794 | 0.593959  |
| 52 | 1 | 0 | -7.358539 | -1.931261 | 0.429729  |
| 53 | 6 | 0 | -1.506152 | 2.152948  | -0.129592 |
| 54 | 6 | 0 | -2.305859 | 3.284140  | -0.282547 |
| 55 | 6 | 0 | -1.916892 | 4.273289  | -1.187082 |
| 56 | 1 | 0 | -3.218176 | 3.385103  | 0.296279  |
| 57 | 6 | 0 | -0.002696 | 2.939451  | -1.728712 |
| 58 | 6 | 0 | -0.745605 | 4.097194  | -1.926584 |
| 59 | 1 | 0 | -2.525796 | 5.161560  | -1.322409 |
| 60 | 1 | 0 | 0.901795  | 2.746549  | -2.296703 |
| 61 | 1 | 0 | -0.417721 | 4.834427  | -2.650852 |
| 62 | 7 | 0 | -0.366183 | 1.995210  | -0.837970 |
| 63 | 1 | 0 | 0.579166  | 0.022671  | -2.168534 |

-----  
**2'**<sub>dp</sub> (triplet) E(B3LYP/ SDD-6-31G(d,p))= -1465.85041792 hartree  
 -----

| Center<br>Number | Atomic<br>Number | Atomic<br>Type | Coordinates (Angstroms) |           |           |
|------------------|------------------|----------------|-------------------------|-----------|-----------|
|                  |                  |                | X                       | Y         | Z         |
| 1                | 7                | 0              | -1.275565               | -1.621796 | -1.024056 |
| 2                | 6                | 0              | -2.252875               | -1.322284 | -2.080731 |
| 3                | 1                | 0              | -1.715387               | -0.859313 | -2.916534 |
| 4                | 1                | 0              | -2.726975               | -2.231785 | -2.482213 |
| 5                | 6                | 0              | -1.826377               | -2.540519 | -0.008213 |
| 6                | 1                | 0              | -2.901956               | -2.341731 | 0.063881  |
| 7                | 1                | 0              | -1.718164               | -3.595147 | -0.302885 |
| 8                | 6                | 0              | 0.043958                | -2.052787 | -1.537658 |
| 9                | 1                | 0              | 0.530631                | -2.624916 | -0.743068 |
| 10               | 1                | 0              | -0.058236               | -2.733658 | -2.396636 |
| 11               | 27               | 0              | -0.948633               | 0.291314  | 0.050247  |
| 12               | 6                | 0              | -3.320250               | -0.350635 | -1.600525 |
| 13               | 6                | 0              | -4.597583               | -0.346901 | -2.160315 |
| 14               | 6                | 0              | -3.859344               | 1.439500  | -0.234692 |
| 15               | 6                | 0              | -5.527175               | 0.601268  | -1.734255 |

|    |   |   |           |           |           |
|----|---|---|-----------|-----------|-----------|
| 16 | 1 | 0 | -4.856960 | -1.078196 | -2.919683 |
| 17 | 6 | 0 | -5.148980 | 1.515168  | -0.751337 |
| 18 | 1 | 0 | -3.524815 | 2.129614  | 0.533458  |
| 19 | 1 | 0 | -6.525989 | 0.622660  | -2.158393 |
| 20 | 1 | 0 | -5.836431 | 2.270136  | -0.385770 |
| 21 | 6 | 0 | -1.223365 | -2.309509 | 1.364040  |
| 22 | 6 | 0 | -1.076291 | -3.348921 | 2.280902  |
| 23 | 6 | 0 | -0.607251 | -3.068477 | 3.564736  |
| 24 | 1 | 0 | -1.332991 | -4.363510 | 1.991839  |
| 25 | 6 | 0 | -0.451773 | -0.768301 | 2.909446  |
| 26 | 6 | 0 | -0.293421 | -1.747600 | 3.884823  |
| 27 | 1 | 0 | -0.488350 | -3.862296 | 4.295046  |
| 28 | 1 | 0 | -0.206424 | 0.269406  | 3.114238  |
| 29 | 1 | 0 | 0.074342  | -1.476400 | 4.868546  |
| 30 | 7 | 0 | -2.955126 | 0.527863  | -0.640031 |
| 31 | 7 | 0 | -0.905450 | -1.028197 | 1.666830  |
| 32 | 6 | 0 | 0.932967  | -0.864660 | -1.936964 |
| 33 | 1 | 0 | 1.875320  | -1.245701 | -2.353584 |
| 34 | 1 | 0 | 0.445718  | -0.300000 | -2.738134 |
| 35 | 7 | 0 | 1.150752  | 0.060440  | -0.804879 |
| 36 | 6 | 0 | 1.400265  | 1.456296  | -1.215571 |
| 37 | 1 | 0 | 2.437382  | 1.631028  | -1.530141 |
| 38 | 1 | 0 | 0.765448  | 1.663283  | -2.086124 |
| 39 | 6 | 0 | 2.161638  | -0.427105 | 0.187090  |
| 40 | 1 | 0 | 2.111056  | 0.257780  | 1.038290  |
| 41 | 1 | 0 | 1.813877  | -1.397502 | 0.549833  |
| 42 | 6 | 0 | 3.593040  | -0.539834 | -0.302420 |
| 43 | 6 | 0 | 4.482517  | 0.537863  | -0.172075 |
| 44 | 6 | 0 | 4.066514  | -1.727532 | -0.881039 |
| 45 | 6 | 0 | 5.796825  | 0.442510  | -0.631459 |
| 46 | 1 | 0 | 4.149563  | 1.451584  | 0.314807  |
| 47 | 6 | 0 | 5.379793  | -1.826840 | -1.342529 |
| 48 | 1 | 0 | 3.410441  | -2.592234 | -0.951136 |
| 49 | 6 | 0 | 6.246433  | -0.738881 | -1.223953 |
| 50 | 1 | 0 | 6.472391  | 1.284951  | -0.516604 |
| 51 | 1 | 0 | 5.729240  | -2.755853 | -1.782974 |
| 52 | 1 | 0 | 7.269894  | -0.816259 | -1.577750 |
| 53 | 6 | 0 | 1.017565  | 2.426319  | -0.111577 |
| 54 | 6 | 0 | 1.756795  | 3.579721  | 0.143963  |
| 55 | 6 | 0 | 1.332408  | 4.462514  | 1.137986  |
| 56 | 1 | 0 | 2.654016  | 3.780770  | -0.433150 |
| 57 | 6 | 0 | -0.509703 | 2.984234  | 1.540608  |
| 58 | 6 | 0 | 0.175290  | 4.154534  | 1.852442  |
| 59 | 1 | 0 | 1.894355  | 5.366171  | 1.350876  |

|    |   |   |           |          |          |
|----|---|---|-----------|----------|----------|
| 60 | 1 | 0 | -1.416715 | 2.711654 | 2.072261 |
| 61 | 1 | 0 | -0.195349 | 4.805457 | 2.636926 |
| 62 | 7 | 0 | -0.109691 | 2.125930 | 0.579819 |

-----

$2'_{dp}$  (singlet) E(B3LYP/ SDD-6-31G(d,p))= -1465.81441560 hartree

-----

| Center<br>Number | Atomic<br>Number | Atomic<br>Type | Coordinates (Angstroms) |           |           |
|------------------|------------------|----------------|-------------------------|-----------|-----------|
|                  |                  |                | X                       | Y         | Z         |
| 1                | 7                | 0              | -1.187595               | -1.532990 | -1.122109 |
| 2                | 6                | 0              | -2.177748               | -1.195365 | -2.180405 |
| 3                | 1                | 0              | -1.636398               | -0.684308 | -2.984341 |
| 4                | 1                | 0              | -2.633553               | -2.097730 | -2.610763 |
| 5                | 6                | 0              | -1.734014               | -2.574324 | -0.210245 |
| 6                | 1                | 0              | -2.804672               | -2.369569 | -0.096033 |
| 7                | 1                | 0              | -1.639575               | -3.576821 | -0.649406 |
| 8                | 6                | 0              | 0.136443                | -1.930821 | -1.686991 |
| 9                | 1                | 0              | 0.639870                | -2.543155 | -0.934295 |
| 10               | 1                | 0              | 0.009486                | -2.558108 | -2.580067 |
| 11               | 27               | 0              | -0.919176               | 0.153416  | -0.081641 |
| 12               | 6                | 0              | -3.207860               | -0.255355 | -1.614832 |
| 13               | 6                | 0              | -4.515500               | -0.197200 | -2.076620 |
| 14               | 6                | 0              | -3.567756               | 1.536920  | -0.189685 |
| 15               | 6                | 0              | -5.378976               | 0.783284  | -1.582249 |
| 16               | 1                | 0              | -4.848499               | -0.905338 | -2.829371 |
| 17               | 6                | 0              | -4.878755               | 1.669497  | -0.627186 |
| 18               | 1                | 0              | -3.165605               | 2.212057  | 0.555612  |
| 19               | 1                | 0              | -6.402737               | 0.852910  | -1.932916 |
| 20               | 1                | 0              | -5.498548               | 2.457103  | -0.211800 |
| 21               | 6                | 0              | -1.091002               | -2.506420 | 1.156411  |
| 22               | 6                | 0              | -0.969374               | -3.626139 | 1.977551  |
| 23               | 6                | 0              | -0.451820               | -3.469560 | 3.264239  |
| 24               | 1                | 0              | -1.282272               | -4.601780 | 1.618416  |
| 25               | 6                | 0              | -0.211106               | -1.132118 | 2.792338  |
| 26               | 6                | 0              | -0.069538               | -2.194736 | 3.681048  |
| 27               | 1                | 0              | -0.349921               | -4.324470 | 3.924899  |
| 28               | 1                | 0              | 0.082536                | -0.124790 | 3.075619  |
| 29               | 1                | 0              | 0.337485                | -2.023207 | 4.671820  |
| 30               | 7                | 0              | -2.716391               | 0.587951  | -0.655863 |
| 31               | 7                | 0              | -0.707823               | -1.272286 | 1.550562  |
| 32               | 6                | 0              | 0.984389                | -0.697990 | -2.009483 |
| 33               | 1                | 0              | 1.962461                | -1.010981 | -2.397568 |
| 34               | 1                | 0              | 0.502856                | -0.106842 | -2.792238 |



|    |   |   |           |           |           |
|----|---|---|-----------|-----------|-----------|
| 35 | 7 | 0 | 1.100593  | 0.154949  | -0.802499 |
| 36 | 6 | 0 | 1.240938  | 1.602881  | -1.085364 |
| 37 | 1 | 0 | 2.271576  | 1.892816  | -1.326521 |
| 38 | 1 | 0 | 0.611801  | 1.831192  | -1.952706 |
| 39 | 6 | 0 | 2.148991  | -0.329782 | 0.162264  |
| 40 | 1 | 0 | 2.035420  | 0.276037  | 1.065006  |
| 41 | 1 | 0 | 1.878235  | -1.350842 | 0.438340  |
| 42 | 6 | 0 | 3.587017  | -0.285485 | -0.315286 |
| 43 | 6 | 0 | 4.384186  | 0.847654  | -0.091208 |
| 44 | 6 | 0 | 4.163621  | -1.387324 | -0.965752 |
| 45 | 6 | 0 | 5.707481  | 0.891529  | -0.531758 |
| 46 | 1 | 0 | 3.972857  | 1.693422  | 0.454739  |
| 47 | 6 | 0 | 5.486464  | -1.347406 | -1.408434 |
| 48 | 1 | 0 | 3.581847  | -2.295568 | -1.106596 |
| 49 | 6 | 0 | 6.259405  | -0.204216 | -1.197914 |
| 50 | 1 | 0 | 6.310671  | 1.774853  | -0.344594 |
| 51 | 1 | 0 | 5.916374  | -2.211653 | -1.905682 |
| 52 | 1 | 0 | 7.290229  | -0.173313 | -1.537010 |
| 53 | 6 | 0 | 0.724125  | 2.385169  | 0.099525  |
| 54 | 6 | 0 | 1.292232  | 3.575300  | 0.539717  |
| 55 | 6 | 0 | 0.733367  | 4.242421  | 1.633505  |
| 56 | 1 | 0 | 2.160564  | 3.975214  | 0.026054  |
| 57 | 6 | 0 | -0.882057 | 2.474810  | 1.779058  |
| 58 | 6 | 0 | -0.368690 | 3.673314  | 2.267686  |
| 59 | 1 | 0 | 1.157183  | 5.177208  | 1.985405  |
| 60 | 1 | 0 | -1.729308 | 1.991404  | 2.254109  |
| 61 | 1 | 0 | -0.827992 | 4.141565  | 3.131433  |
| 62 | 7 | 0 | -0.367559 | 1.840838  | 0.703507  |

-----  
**3'<sub>A</sub>** (quartet) E(B3LYP/ SDD-6-31G(d,p))= -1466.74194080 hartree  
 -----

| Center<br>Number | Atomic<br>Number | Atomic<br>Type | Coordinates (Angstroms) |           |           |
|------------------|------------------|----------------|-------------------------|-----------|-----------|
|                  |                  |                | X                       | Y         | Z         |
| 1                | 7                | 0              | -1.768366               | -1.038317 | -1.230052 |
| 2                | 6                | 0              | -2.528509               | -0.241398 | -2.219933 |
| 3                | 1                | 0              | -1.823004               | 0.212569  | -2.923110 |
| 4                | 1                | 0              | -3.196722               | -0.872925 | -2.819939 |
| 5                | 6                | 0              | -2.639794               | -2.064701 | -0.610038 |
| 6                | 1                | 0              | -3.654533               | -1.653066 | -0.557660 |
| 7                | 1                | 0              | -2.697741               | -2.969255 | -1.230148 |
| 8                | 6                | 0              | -0.529699               | -1.628439 | -1.790532 |
| 9                | 1                | 0              | -0.208118               | -2.424056 | -1.113471 |
| 10               | 1                | 0              | -0.714294               | -2.100108 | -2.766479 |

|    |    |   |           |           |           |
|----|----|---|-----------|-----------|-----------|
| 11 | 27 | 0 | -1.100489 | 0.344584  | 0.432987  |
| 12 | 6  | 0 | -3.304619 | 0.867325  | -1.538888 |
| 13 | 6  | 0 | -4.477496 | 1.396860  | -2.071280 |
| 14 | 6  | 0 | -3.364306 | 2.377229  | 0.232885  |
| 15 | 6  | 0 | -5.098368 | 2.461846  | -1.416481 |
| 16 | 1  | 0 | -4.897829 | 0.983375  | -2.982440 |
| 17 | 6  | 0 | -4.532081 | 2.962704  | -0.243728 |
| 18 | 1  | 0 | -2.886224 | 2.717693  | 1.146039  |
| 19 | 1  | 0 | -6.013456 | 2.889301  | -1.813974 |
| 20 | 1  | 0 | -4.986884 | 3.784790  | 0.297287  |
| 21 | 6  | 0 | -2.206587 | -2.403081 | 0.799318  |
| 22 | 6  | 0 | -2.505787 | -3.625668 | 1.396695  |
| 23 | 6  | 0 | -2.172048 | -3.824194 | 2.737010  |
| 24 | 1  | 0 | -2.999721 | -4.404590 | 0.824773  |
| 25 | 6  | 0 | -1.265621 | -1.608040 | 2.774748  |
| 26 | 6  | 0 | -1.545540 | -2.795078 | 3.441817  |
| 27 | 1  | 0 | -2.399921 | -4.767336 | 3.223462  |
| 28 | 1  | 0 | -0.779500 | -0.774657 | 3.272061  |
| 29 | 1  | 0 | -1.276523 | -2.907383 | 4.486022  |
| 30 | 7  | 0 | -2.760990 | 1.351907  | -0.401344 |
| 31 | 7  | 0 | -1.584273 | -1.416712 | 1.478707  |
| 32 | 6  | 0 | 0.567960  | -0.580779 | -1.947026 |
| 33 | 1  | 0 | 1.454714  | -1.044950 | -2.393624 |
| 34 | 1  | 0 | 0.237406  | 0.195368  | -2.642868 |
| 35 | 7  | 0 | 0.921957  | 0.098459  | -0.659361 |
| 36 | 6  | 0 | 1.647263  | 1.349248  | -1.039616 |
| 37 | 1  | 0 | 2.485163  | 1.102837  | -1.702906 |
| 38 | 1  | 0 | 0.948569  | 1.960117  | -1.624768 |
| 39 | 6  | 0 | 1.766585  | -0.800822 | 0.234617  |
| 40 | 1  | 0 | 1.947578  | -0.236696 | 1.153233  |
| 41 | 1  | 0 | 1.125075  | -1.640447 | 0.510640  |
| 42 | 6  | 0 | 3.074679  | -1.315904 | -0.331140 |
| 43 | 6  | 0 | 4.277939  | -0.630463 | -0.103602 |
| 44 | 6  | 0 | 3.119580  | -2.522342 | -1.049315 |
| 45 | 6  | 0 | 5.485305  | -1.116241 | -0.607138 |
| 46 | 1  | 0 | 4.279918  | 0.271472  | 0.502412  |
| 47 | 6  | 0 | 4.324503  | -3.009916 | -1.555983 |
| 48 | 1  | 0 | 2.212440  | -3.105117 | -1.191692 |
| 49 | 6  | 0 | 5.509402  | -2.303163 | -1.341778 |
| 50 | 1  | 0 | 6.408653  | -0.579971 | -0.411351 |
| 51 | 1  | 0 | 4.340935  | -3.947199 | -2.103035 |
| 52 | 1  | 0 | 6.448708  | -2.685582 | -1.728087 |
| 53 | 6  | 0 | 2.210331  | 2.238925  | 0.052345  |
| 54 | 6  | 0 | 3.420594  | 2.909235  | -0.122991 |

|    |   |   |           |          |           |
|----|---|---|-----------|----------|-----------|
| 55 | 6 | 0 | 3.866660  | 3.812714 | 0.844093  |
| 56 | 1 | 0 | 4.008469  | 2.722998 | -1.014691 |
| 57 | 6 | 0 | 1.914501  | 3.343975 | 2.136450  |
| 58 | 6 | 0 | 3.106346  | 4.034360 | 1.995847  |
| 59 | 1 | 0 | 4.806332  | 4.336950 | 0.700866  |
| 60 | 1 | 0 | 1.258152  | 3.445992 | 2.993814  |
| 61 | 1 | 0 | 3.428932  | 4.724189 | 2.766931  |
| 62 | 7 | 0 | 1.504433  | 2.489311 | 1.177096  |
| 63 | 1 | 0 | 0.563236  | 1.983127 | 1.332360  |
| 64 | 1 | 0 | -0.623097 | 1.381117 | 1.626236  |

-----

**3'<sub>A</sub>** (doublet) E(B3LYP/ SDD-6-31G(d,p))= -1466.73453364 hartree

| Center<br>Number | Atomic<br>Number | Atomic<br>Type | Coordinates (Angstroms) |           |           |
|------------------|------------------|----------------|-------------------------|-----------|-----------|
|                  |                  |                | X                       | Y         | Z         |
| 1                | 7                | 0              | -2.021581               | -1.168421 | -1.040375 |
| 2                | 6                | 0              | -2.992076               | -0.391586 | -1.869241 |
| 3                | 1                | 0              | -2.814484               | -0.557037 | -2.938188 |
| 4                | 1                | 0              | -4.001774               | -0.763352 | -1.665692 |
| 5                | 6                | 0              | -2.609624               | -2.421346 | -0.478101 |
| 6                | 1                | 0              | -3.652758               | -2.216901 | -0.213915 |
| 7                | 1                | 0              | -2.614404               | -3.234277 | -1.214708 |
| 8                | 6                | 0              | -0.765329               | -1.482233 | -1.793701 |
| 9                | 1                | 0              | -0.277911               | -2.314141 | -1.281739 |
| 10               | 1                | 0              | -1.014379               | -1.830003 | -2.804473 |
| 11               | 27               | 0              | -1.510080               | -0.046965 | 0.577606  |
| 12               | 6                | 0              | -2.966389               | 1.087484  | -1.545142 |
| 13               | 6                | 0              | -3.629738               | 2.015273  | -2.347362 |
| 14               | 6                | 0              | -2.394364               | 2.746680  | -0.016981 |
| 15               | 6                | 0              | -3.670336               | 3.350881  | -1.953456 |
| 16               | 1                | 0              | -4.118472               | 1.689561  | -3.260159 |
| 17               | 6                | 0              | -3.046806               | 3.720864  | -0.760043 |
| 18               | 1                | 0              | -1.911668               | 2.982959  | 0.922949  |
| 19               | 1                | 0              | -4.187171               | 4.087192  | -2.560467 |
| 20               | 1                | 0              | -3.069853               | 4.745059  | -0.405134 |
| 21               | 6                | 0              | -1.869737               | -2.817794 | 0.780975  |
| 22               | 6                | 0              | -1.839150               | -4.126586 | 1.253136  |
| 23               | 6                | 0              | -1.228219               | -4.390888 | 2.479628  |
| 24               | 1                | 0              | -2.295905               | -4.923252 | 0.675064  |
| 25               | 6                | 0              | -0.718014               | -2.054624 | 2.656144  |
| 26               | 6                | 0              | -0.663506               | -3.334743 | 3.194927  |
| 27               | 1                | 0              | -1.198073               | -5.402850 | 2.870437  |

|    |   |   |           |           |           |
|----|---|---|-----------|-----------|-----------|
| 28 | 1 | 0 | -0.298384 | -1.202322 | 3.175726  |
| 29 | 1 | 0 | -0.188389 | -3.494749 | 4.156201  |
| 30 | 7 | 0 | -2.337060 | 1.451148  | -0.400678 |
| 31 | 7 | 0 | -1.300766 | -1.793546 | 1.467653  |
| 32 | 6 | 0 | 0.177672  | -0.288826 | -1.881111 |
| 33 | 1 | 0 | 1.014433  | -0.543445 | -2.544085 |
| 34 | 1 | 0 | -0.342835 | 0.556777  | -2.340382 |
| 35 | 7 | 0 | 0.661164  | 0.143762  | -0.540405 |
| 36 | 6 | 0 | 1.225998  | 1.505474  | -0.682252 |
| 37 | 1 | 0 | 2.087474  | 1.513454  | -1.362869 |
| 38 | 1 | 0 | 0.452915  | 2.137960  | -1.135254 |
| 39 | 6 | 0 | 1.679145  | -0.819722 | 0.034547  |
| 40 | 1 | 0 | 1.925062  | -0.448444 | 1.033307  |
| 41 | 1 | 0 | 1.158278  | -1.766592 | 0.184764  |
| 42 | 6 | 0 | 2.948368  | -1.045700 | -0.763581 |
| 43 | 6 | 0 | 4.099260  | -0.280442 | -0.519273 |
| 44 | 6 | 0 | 3.013662  | -2.053640 | -1.739364 |
| 45 | 6 | 0 | 5.270508  | -0.493587 | -1.247614 |
| 46 | 1 | 0 | 4.093682  | 0.465755  | 0.271570  |
| 47 | 6 | 0 | 4.181885  | -2.268553 | -2.471415 |
| 48 | 1 | 0 | 2.155335  | -2.699033 | -1.912657 |
| 49 | 6 | 0 | 5.311137  | -1.483420 | -2.231240 |
| 50 | 1 | 0 | 6.155128  | 0.099486  | -1.037245 |
| 51 | 1 | 0 | 4.215757  | -3.057043 | -3.216604 |
| 52 | 1 | 0 | 6.222994  | -1.654704 | -2.794229 |
| 53 | 6 | 0 | 1.659203  | 2.179740  | 0.601993  |
| 54 | 6 | 0 | 2.775309  | 3.011786  | 0.668891  |
| 55 | 6 | 0 | 3.079566  | 3.677852  | 1.857994  |
| 56 | 1 | 0 | 3.399585  | 3.132857  | -0.209323 |
| 57 | 6 | 0 | 1.172601  | 2.664839  | 2.880762  |
| 58 | 6 | 0 | 2.270144  | 3.501230  | 2.985178  |
| 59 | 1 | 0 | 3.947527  | 4.328001  | 1.906903  |
| 60 | 1 | 0 | 0.486616  | 2.467575  | 3.697301  |
| 61 | 1 | 0 | 2.484858  | 3.999943  | 3.923088  |
| 62 | 7 | 0 | 0.900933  | 2.043769  | 1.713003  |
| 63 | 1 | 0 | 0.033401  | 1.423917  | 1.672077  |
| 64 | 1 | 0 | -1.220265 | 0.758243  | 1.852181  |

-----

**3'**<sub>B</sub> (quartet) E(B3LYP/ SDD-6-31G(d,p))= -1466.73730445 hartree

-----

| Center<br>Number | Atomic<br>Number | Atomic<br>Type | Coordinates (Angstroms) |   |   |
|------------------|------------------|----------------|-------------------------|---|---|
|                  |                  |                | X                       | Y | Z |

|    |    |   |           |           |           |
|----|----|---|-----------|-----------|-----------|
| 1  | 7  | 0 | -1.608752 | -1.258530 | -0.510594 |
| 2  | 6  | 0 | -2.561499 | -1.296336 | -1.649966 |
| 3  | 1  | 0 | -2.046093 | -0.890034 | -2.527190 |
| 4  | 1  | 0 | -2.823113 | -2.336142 | -1.894985 |
| 5  | 6  | 0 | -2.228949 | -1.795242 | 0.718214  |
| 6  | 1  | 0 | -3.242650 | -1.384742 | 0.794255  |
| 7  | 1  | 0 | -2.340458 | -2.889014 | 0.675883  |
| 8  | 6  | 0 | -0.396361 | -2.040786 | -0.896254 |
| 9  | 1  | 0 | 0.047789  | -2.441308 | 0.017606  |
| 10 | 1  | 0 | -0.673388 | -2.909602 | -1.510468 |
| 11 | 27 | 0 | -0.478205 | 0.831281  | 0.236294  |
| 12 | 6  | 0 | -3.862680 | -0.539013 | -1.486796 |
| 13 | 6  | 0 | -5.095165 | -1.087594 | -1.831087 |
| 14 | 6  | 0 | -4.922676 | 1.523553  | -0.972644 |
| 15 | 6  | 0 | -6.251297 | -0.304929 | -1.750757 |
| 16 | 1  | 0 | -5.148556 | -2.117250 | -2.167132 |
| 17 | 6  | 0 | -6.168018 | 1.020022  | -1.316185 |
| 18 | 1  | 0 | -4.760673 | 2.537007  | -0.622070 |
| 19 | 1  | 0 | -7.211653 | -0.730254 | -2.024838 |
| 20 | 1  | 0 | -7.046605 | 1.650352  | -1.243149 |
| 21 | 6  | 0 | -1.491293 | -1.409785 | 1.985806  |
| 22 | 6  | 0 | -1.586242 | -2.206436 | 3.126919  |
| 23 | 6  | 0 | -0.988332 | -1.783377 | 4.313385  |
| 24 | 1  | 0 | -2.128415 | -3.145659 | 3.085750  |
| 25 | 6  | 0 | -0.226013 | 0.160314  | 3.148459  |
| 26 | 6  | 0 | -0.297792 | -0.571321 | 4.326878  |
| 27 | 1  | 0 | -1.058319 | -2.391146 | 5.209896  |
| 28 | 1  | 0 | 0.318015  | 1.098720  | 3.107201  |
| 29 | 1  | 0 | 0.183066  | -0.201771 | 5.225494  |
| 30 | 7  | 0 | -3.827573 | 0.746451  | -1.069307 |
| 31 | 7  | 0 | -0.808544 | -0.241997 | 1.997532  |
| 32 | 6  | 0 | 0.631250  | -1.192930 | -1.646642 |
| 33 | 1  | 0 | 1.434350  | -1.834978 | -2.025774 |
| 34 | 1  | 0 | 0.168252  | -0.715580 | -2.515444 |
| 35 | 7  | 0 | 1.169281  | -0.121996 | -0.769149 |
| 36 | 6  | 0 | 1.745347  | 1.014573  | -1.537548 |
| 37 | 1  | 0 | 2.713959  | 0.754296  | -1.977301 |
| 38 | 1  | 0 | 1.062741  | 1.239481  | -2.366046 |
| 39 | 6  | 0 | 2.180467  | -0.657118 | 0.238768  |
| 40 | 1  | 0 | 2.424522  | 0.179782  | 0.897494  |
| 41 | 1  | 0 | 1.656861  | -1.396319 | 0.848311  |
| 42 | 6  | 0 | 3.446474  | -1.255859 | -0.333554 |
| 43 | 6  | 0 | 4.583826  | -0.459246 | -0.541748 |

|    |   |   |           |           |           |
|----|---|---|-----------|-----------|-----------|
| 44 | 6 | 0 | 3.522945  | -2.626209 | -0.629803 |
| 45 | 6 | 0 | 5.755174  | -1.010789 | -1.061871 |
| 46 | 1 | 0 | 4.564083  | 0.593547  | -0.269425 |
| 47 | 6 | 0 | 4.693163  | -3.179771 | -1.150379 |
| 48 | 1 | 0 | 2.673547  | -3.275002 | -0.426800 |
| 49 | 6 | 0 | 5.808988  | -2.370741 | -1.373646 |
| 50 | 1 | 0 | 6.628914  | -0.383936 | -1.209738 |
| 51 | 1 | 0 | 4.738858  | -4.242230 | -1.367707 |
| 52 | 1 | 0 | 6.721898  | -2.801588 | -1.772190 |
| 53 | 6 | 0 | 1.869948  | 2.252784  | -0.666152 |
| 54 | 6 | 0 | 2.836160  | 3.228503  | -0.904488 |
| 55 | 6 | 0 | 2.849288  | 4.378916  | -0.115248 |
| 56 | 1 | 0 | 3.562175  | 3.089744  | -1.698990 |
| 57 | 6 | 0 | 0.965033  | 3.506355  | 1.075642  |
| 58 | 6 | 0 | 1.895677  | 4.522408  | 0.893804  |
| 59 | 1 | 0 | 3.592662  | 5.151224  | -0.285453 |
| 60 | 1 | 0 | 0.197229  | 3.578906  | 1.840176  |
| 61 | 1 | 0 | 1.870554  | 5.401709  | 1.527518  |
| 62 | 7 | 0 | 0.953433  | 2.391730  | 0.318882  |
| 63 | 1 | 0 | -2.868986 | 1.160348  | -0.791330 |
| 64 | 1 | 0 | -1.688482 | 1.677566  | -0.463702 |

-----  
**3'<sub>B</sub>** (doublet) E(B3LYP/ SDD-6-31G(d,p))= -1466.73043159 hartree  
 -----

| Center<br>Number | Atomic<br>Number | Atomic<br>Type | Coordinates (Angstroms) |           |           |
|------------------|------------------|----------------|-------------------------|-----------|-----------|
|                  |                  |                | X                       | Y         | Z         |
| 1                | 7                | 0              | -1.420416               | -1.188025 | -0.687588 |
| 2                | 6                | 0              | -2.400310               | -1.017005 | -1.801962 |
| 3                | 1                | 0              | -1.910739               | -0.426906 | -2.584793 |
| 4                | 1                | 0              | -2.622891               | -1.997171 | -2.244077 |
| 5                | 6                | 0              | -2.006735               | -2.034380 | 0.395317  |
| 6                | 1                | 0              | -3.011329               | -1.657936 | 0.612866  |
| 7                | 1                | 0              | -2.119516               | -3.072347 | 0.054437  |
| 8                | 6                | 0              | -0.202011               | -1.878476 | -1.260144 |
| 9                | 1                | 0              | 0.266755                | -2.428939 | -0.443147 |
| 10               | 1                | 0              | -0.500652               | -2.616815 | -2.014975 |
| 11               | 27               | 0              | -0.573500               | 0.526059  | 0.208296  |
| 12               | 6                | 0              | -3.736350               | -0.364269 | -1.499234 |
| 13               | 6                | 0              | -4.890359               | -0.732281 | -2.187119 |
| 14               | 6                | 0              | -4.957148               | 1.320884  | -0.352906 |
| 15               | 6                | 0              | -6.085149               | -0.045595 | -1.956416 |
| 16               | 1                | 0              | -4.853144               | -1.547523 | -2.901544 |
| 17               | 6                | 0              | -6.123274               | 0.997803  | -1.026923 |

|    |   |   |           |           |           |
|----|---|---|-----------|-----------|-----------|
| 18 | 1 | 0 | -4.892988 | 2.102661  | 0.395801  |
| 19 | 1 | 0 | -6.983466 | -0.329387 | -2.495692 |
| 20 | 1 | 0 | -7.036894 | 1.543958  | -0.822960 |
| 21 | 6 | 0 | -1.189152 | -1.973544 | 1.669977  |
| 22 | 6 | 0 | -1.256918 | -2.989602 | 2.622974  |
| 23 | 6 | 0 | -0.562464 | -2.834751 | 3.822778  |
| 24 | 1 | 0 | -1.846456 | -3.881148 | 2.433207  |
| 25 | 6 | 0 | 0.213585  | -0.717320 | 3.014448  |
| 26 | 6 | 0 | 0.182434  | -1.672699 | 4.025805  |
| 27 | 1 | 0 | -0.602003 | -3.607570 | 4.583652  |
| 28 | 1 | 0 | 0.790103  | 0.195962  | 3.125137  |
| 29 | 1 | 0 | 0.735263  | -1.509569 | 4.944245  |
| 30 | 7 | 0 | -3.816901 | 0.648807  | -0.610183 |
| 31 | 7 | 0 | -0.454784 | -0.860120 | 1.856051  |
| 32 | 6 | 0 | 0.783151  | -0.874874 | -1.844725 |
| 33 | 1 | 0 | 1.645170  | -1.395138 | -2.276371 |
| 34 | 1 | 0 | 0.318922  | -0.305353 | -2.655446 |
| 35 | 7 | 0 | 1.191049  | 0.080481  | -0.777662 |
| 36 | 6 | 0 | 1.604427  | 1.410933  | -1.313368 |
| 37 | 1 | 0 | 2.636386  | 1.401725  | -1.677500 |
| 38 | 1 | 0 | 0.962747  | 1.648886  | -2.170107 |
| 39 | 6 | 0 | 2.276294  | -0.489267 | 0.127947  |
| 40 | 1 | 0 | 2.403239  | 0.241258  | 0.930374  |
| 41 | 1 | 0 | 1.860915  | -1.388747 | 0.583796  |
| 42 | 6 | 0 | 3.606062  | -0.793356 | -0.523805 |
| 43 | 6 | 0 | 4.629148  | 0.168400  | -0.547674 |
| 44 | 6 | 0 | 3.861938  | -2.058720 | -1.076624 |
| 45 | 6 | 0 | 5.860786  | -0.114385 | -1.139176 |
| 46 | 1 | 0 | 4.474239  | 1.134807  | -0.072936 |
| 47 | 6 | 0 | 5.092186  | -2.343338 | -1.670182 |
| 48 | 1 | 0 | 3.108381  | -2.841095 | -1.015739 |
| 49 | 6 | 0 | 6.090846  | -1.368277 | -1.708870 |
| 50 | 1 | 0 | 6.644580  | 0.636513  | -1.142148 |
| 51 | 1 | 0 | 5.276792  | -3.328477 | -2.086777 |
| 52 | 1 | 0 | 7.050818  | -1.591084 | -2.163474 |
| 53 | 6 | 0 | 1.397046  | 2.456478  | -0.241959 |
| 54 | 6 | 0 | 2.170822  | 3.607216  | -0.125790 |
| 55 | 6 | 0 | 1.861282  | 4.534745  | 0.870546  |
| 56 | 1 | 0 | 3.000137  | 3.773541  | -0.805312 |
| 57 | 6 | 0 | 0.054580  | 3.111622  | 1.551375  |
| 58 | 6 | 0 | 0.787068  | 4.280771  | 1.723996  |
| 59 | 1 | 0 | 2.451372  | 5.439029  | 0.979688  |
| 60 | 1 | 0 | -0.793127 | 2.869311  | 2.181416  |
| 61 | 1 | 0 | 0.515667  | 4.974934  | 2.511349  |

|    |   |   |           |          |           |
|----|---|---|-----------|----------|-----------|
| 62 | 7 | 0 | 0.352670  | 2.213865 | 0.590218  |
| 63 | 1 | 0 | -2.928605 | 0.889595 | -0.047840 |
| 64 | 1 | 0 | -1.887216 | 1.084077 | 0.775326  |

-----  
**3'**<sub>c</sub> (quarete) E(B3LYP/ SDD-6-31G(d,p))= -1466.73919491 hartree

| Center<br>Number | Atomic<br>Number | Atomic<br>Type | Coordinates (Angstroms) |           |           |
|------------------|------------------|----------------|-------------------------|-----------|-----------|
|                  |                  |                | X                       | Y         | Z         |
| 1                | 7                | 0              | 1.546675                | 1.050299  | -1.087986 |
| 2                | 6                | 0              | 2.302643                | 0.212771  | -2.055838 |
| 3                | 1                | 0              | 1.588286                | -0.272254 | -2.726486 |
| 4                | 1                | 0              | 2.952239                | 0.826266  | -2.695148 |
| 5                | 6                | 0              | 2.461109                | 2.122962  | -0.624196 |
| 6                | 1                | 0              | 3.365127                | 1.633518  | -0.241562 |
| 7                | 1                | 0              | 2.776187                | 2.750887  | -1.470543 |
| 8                | 6                | 0              | 0.304215                | 1.594412  | -1.692180 |
| 9                | 1                | 0              | -0.083534               | 2.361725  | -1.016737 |
| 10               | 1                | 0              | 0.505329                | 2.093570  | -2.652860 |
| 11               | 27               | 0              | 0.724628                | -0.738692 | 0.449164  |
| 12               | 6                | 0              | 3.107459                | -0.873593 | -1.379073 |
| 13               | 6                | 0              | 4.373973                | -1.245546 | -1.823357 |
| 14               | 6                | 0              | 3.119809                | -2.562029 | 0.218741  |
| 15               | 6                | 0              | 5.021419                | -2.322609 | -1.214918 |
| 16               | 1                | 0              | 4.843522                | -0.704228 | -2.638251 |
| 17               | 6                | 0              | 4.380704                | -2.996136 | -0.175985 |
| 18               | 1                | 0              | 2.587462                | -3.056781 | 1.024517  |
| 19               | 1                | 0              | 6.008189                | -2.628469 | -1.547576 |
| 20               | 1                | 0              | 4.844114                | -3.839298 | 0.323648  |
| 21               | 6                | 0              | 1.948258                | 3.053674  | 0.453702  |
| 22               | 6                | 0              | 2.072653                | 4.437722  | 0.366536  |
| 23               | 6                | 0              | 1.687934                | 5.241350  | 1.444279  |
| 24               | 1                | 0              | 2.478590                | 4.882681  | -0.535196 |
| 25               | 6                | 0              | 1.051772                | 3.274319  | 2.643369  |
| 26               | 6                | 0              | 1.171943                | 4.654798  | 2.602327  |
| 27               | 1                | 0              | 1.791871                | 6.319857  | 1.378156  |
| 28               | 1                | 0              | 0.657986                | 2.730294  | 3.495045  |
| 29               | 1                | 0              | 0.868115                | 5.251112  | 3.454779  |
| 30               | 7                | 0              | 2.491847                | -1.522225 | -0.365715 |
| 31               | 7                | 0              | 1.438176                | 2.527940  | 1.590942  |
| 32               | 6                | 0              | -0.755781               | 0.512497  | -1.919192 |
| 33               | 1                | 0              | -1.663373               | 0.979694  | -2.317552 |



|    |   |   |           |           |           |
|----|---|---|-----------|-----------|-----------|
| 34 | 1 | 0 | -0.417593 | -0.194229 | -2.680971 |
| 35 | 7 | 0 | -1.053614 | -0.263066 | -0.684736 |
| 36 | 6 | 0 | -1.622936 | -1.601767 | -1.013661 |
| 37 | 1 | 0 | -2.658600 | -1.520852 | -1.360529 |
| 38 | 1 | 0 | -1.037020 | -2.017427 | -1.842122 |
| 39 | 6 | 0 | -1.963488 | 0.505917  | 0.266787  |
| 40 | 1 | 0 | -2.012765 | -0.083367 | 1.185974  |
| 41 | 1 | 0 | -1.435201 | 1.430475  | 0.512467  |
| 42 | 6 | 0 | -3.357911 | 0.816768  | -0.230934 |
| 43 | 6 | 0 | -4.421189 | -0.061222 | 0.033547  |
| 44 | 6 | 0 | -3.626630 | 2.005966  | -0.927458 |
| 45 | 6 | 0 | -5.711607 | 0.227048  | -0.412091 |
| 46 | 1 | 0 | -4.245480 | -0.963134 | 0.615300  |
| 47 | 6 | 0 | -4.915831 | 2.295441  | -1.375784 |
| 48 | 1 | 0 | -2.830753 | 2.727874  | -1.098639 |
| 49 | 6 | 0 | -5.959290 | 1.402612  | -1.123672 |
| 50 | 1 | 0 | -6.525182 | -0.457117 | -0.192430 |
| 51 | 1 | 0 | -5.108612 | 3.221484  | -1.908178 |
| 52 | 1 | 0 | -6.963892 | 1.630048  | -1.465560 |
| 53 | 6 | 0 | -1.532682 | -2.550704 | 0.166279  |
| 54 | 6 | 0 | -2.470389 | -3.559419 | 0.379307  |
| 55 | 6 | 0 | -2.303212 | -4.424494 | 1.461568  |
| 56 | 1 | 0 | -3.316567 | -3.664525 | -0.291833 |
| 57 | 6 | 0 | -0.322565 | -3.212038 | 2.043599  |
| 58 | 6 | 0 | -1.212570 | -4.245124 | 2.313836  |
| 59 | 1 | 0 | -3.020164 | -5.218870 | 1.643289  |
| 60 | 1 | 0 | 0.529005  | -3.018272 | 2.688876  |
| 61 | 1 | 0 | -1.056067 | -4.885340 | 3.174666  |
| 62 | 7 | 0 | -0.469109 | -2.390698 | 0.985445  |
| 63 | 1 | 0 | 1.306200  | 1.459113  | 1.651151  |
| 64 | 1 | 0 | 1.062928  | 0.133052  | 1.788019  |

-----  
**3'<sub>c</sub>** (doublet) E(B3LYP/ SDD-6-31G(d,p))= -1466.72158512 hartree  
 -----

| Center<br>Number | Atomic<br>Number | Atomic<br>Type | Coordinates (Angstroms) |          |           |
|------------------|------------------|----------------|-------------------------|----------|-----------|
|                  |                  |                | X                       | Y        | Z         |
| 1                | 7                | 0              | 1.296890                | 1.221494 | -1.177500 |
| 2                | 6                | 0              | 2.232467                | 0.566976 | -2.175949 |
| 3                | 1                | 0              | 1.630942                | 0.216309 | -3.019100 |
| 4                | 1                | 0              | 2.915234                | 1.315823 | -2.589550 |
| 5                | 6                | 0              | 1.950703                | 2.504070 | -0.759105 |
| 6                | 1                | 0              | 2.974340                | 2.251811 | -0.465857 |
| 7                | 1                | 0              | 2.011762                | 3.184106 | -1.617371 |

|    |    |   |           |           |           |
|----|----|---|-----------|-----------|-----------|
| 8  | 6  | 0 | -0.021110 | 1.480344  | -1.858243 |
| 9  | 1  | 0 | -0.575157 | 2.198496  | -1.248382 |
| 10 | 1  | 0 | 0.134574  | 1.942563  | -2.841779 |
| 11 | 27 | 0 | 0.826367  | -0.174739 | 0.316527  |
| 12 | 6  | 0 | 2.998245  | -0.611681 | -1.627834 |
| 13 | 6  | 0 | 4.250850  | -0.966014 | -2.125892 |
| 14 | 6  | 0 | 2.941147  | -2.464452 | -0.250502 |
| 15 | 6  | 0 | 4.850825  | -2.136738 | -1.660327 |
| 16 | 1  | 0 | 4.744228  | -0.345412 | -2.867282 |
| 17 | 6  | 0 | 4.179741  | -2.904551 | -0.709294 |
| 18 | 1  | 0 | 2.399732  | -3.017918 | 0.509674  |
| 19 | 1  | 0 | 5.824557  | -2.439819 | -2.031394 |
| 20 | 1  | 0 | 4.608309  | -3.821384 | -0.320095 |
| 21 | 6  | 0 | 1.313476  | 3.262706  | 0.385394  |
| 22 | 6  | 0 | 0.880433  | 4.580396  | 0.287285  |
| 23 | 6  | 0 | 0.419921  | 5.246683  | 1.429177  |
| 24 | 1  | 0 | 0.918723  | 5.088192  | -0.670318 |
| 25 | 6  | 0 | 0.827926  | 3.269317  | 2.713585  |
| 26 | 6  | 0 | 0.394656  | 4.586582  | 2.659676  |
| 27 | 1  | 0 | 0.087973  | 6.277667  | 1.356326  |
| 28 | 1  | 0 | 0.842723  | 2.680684  | 3.624145  |
| 29 | 1  | 0 | 0.050035  | 5.079654  | 3.561313  |
| 30 | 7  | 0 | 2.354319  | -1.342569 | -0.701353 |
| 31 | 7  | 0 | 1.268876  | 2.659979  | 1.597439  |
| 32 | 6  | 0 | -0.813252 | 0.176899  | -1.996158 |
| 33 | 1  | 0 | -1.780683 | 0.372629  | -2.470950 |
| 34 | 1  | 0 | -0.281796 | -0.534648 | -2.632913 |
| 35 | 7  | 0 | -0.967076 | -0.434752 | -0.652664 |
| 36 | 6  | 0 | -1.130588 | -1.912397 | -0.641254 |
| 37 | 1  | 0 | -2.143453 | -2.222221 | -0.919095 |
| 38 | 1  | 0 | -0.436719 | -2.331204 | -1.378404 |
| 39 | 6  | 0 | -2.072019 | 0.242316  | 0.153589  |
| 40 | 1  | 0 | -2.013158 | -0.170842 | 1.162625  |
| 41 | 1  | 0 | -1.805432 | 1.300405  | 0.226185  |
| 42 | 6  | 0 | -3.476250 | 0.097311  | -0.390127 |
| 43 | 6  | 0 | -4.288812 | -0.973997 | 0.014356  |
| 44 | 6  | 0 | -4.007356 | 1.045767  | -1.278593 |
| 45 | 6  | 0 | -5.585463 | -1.111514 | -0.481847 |
| 46 | 1  | 0 | -3.916581 | -1.691363 | 0.742094  |
| 47 | 6  | 0 | -5.303702 | 0.909715  | -1.776498 |
| 48 | 1  | 0 | -3.417287 | 1.913808  | -1.565382 |
| 49 | 6  | 0 | -6.092143 | -0.173573 | -1.383723 |
| 50 | 1  | 0 | -6.204339 | -1.941050 | -0.154725 |
| 51 | 1  | 0 | -5.702240 | 1.654143  | -2.458470 |

|    |   |   |           |           |           |
|----|---|---|-----------|-----------|-----------|
| 52 | 1 | 0 | -7.102744 | -0.277084 | -1.765503 |
| 53 | 6 | 0 | -0.758302 | -2.415395 | 0.739150  |
| 54 | 6 | 0 | -1.281046 | -3.579210 | 1.294910  |
| 55 | 6 | 0 | -0.851796 | -3.981578 | 2.561158  |
| 56 | 1 | 0 | -2.011661 | -4.161171 | 0.742645  |
| 57 | 6 | 0 | 0.562491  | -2.045308 | 2.629597  |
| 58 | 6 | 0 | 0.083253  | -3.200019 | 3.239839  |
| 59 | 1 | 0 | -1.246051 | -4.886949 | 3.011424  |
| 60 | 1 | 0 | 1.295292  | -1.406947 | 3.108137  |
| 61 | 1 | 0 | 0.438891  | -3.474295 | 4.226653  |
| 62 | 7 | 0 | 0.155512  | -1.659184 | 1.403274  |
| 63 | 1 | 0 | 1.558220  | 1.625309  | 1.612678  |
| 64 | 1 | 0 | 1.904461  | 0.267951  | 1.347858  |

-----

**3'**<sub>dp-A</sub> (quartet) E(B3LYP/ SDD-6-31G(d,p))= -1466.41352706 hartree

| Center<br>Number | Atomic<br>Number | Atomic<br>Type | Coordinates (Angstroms) |           |           |
|------------------|------------------|----------------|-------------------------|-----------|-----------|
|                  |                  |                | X                       | Y         | Z         |
| 1                | 7                | 0              | 0.887498                | -0.791195 | 1.468652  |
| 2                | 6                | 0              | 1.986163                | 0.010102  | 2.030298  |
| 3                | 1                | 0              | 1.630317                | 1.040189  | 2.141968  |
| 4                | 1                | 0              | 2.290227                | -0.336592 | 3.030616  |
| 5                | 6                | 0              | 1.219442                | -2.230893 | 1.454317  |
| 6                | 1                | 0              | 2.308892                | -2.330433 | 1.399510  |
| 7                | 1                | 0              | 0.909877                | -2.727833 | 2.384833  |
| 8                | 6                | 0              | -0.437427               | -0.545624 | 2.084429  |
| 9                | 1                | 0              | -1.028092               | -1.455029 | 1.945007  |
| 10               | 1                | 0              | -0.352209               | -0.394842 | 3.171247  |
| 11               | 27               | 0              | 0.776476                | -0.031195 | -0.739695 |
| 12               | 6                | 0              | 3.189078                | 0.003226  | 1.096202  |
| 13               | 6                | 0              | 4.497717                | 0.068866  | 1.575300  |
| 14               | 6                | 0              | 3.939613                | -0.038224 | -1.104524 |
| 15               | 6                | 0              | 5.552824                | 0.087798  | 0.661421  |
| 16               | 1                | 0              | 4.685795                | 0.100666  | 2.643925  |
| 17               | 6                | 0              | 5.272255                | 0.030553  | -0.703611 |
| 18               | 1                | 0              | 3.651990                | -0.078709 | -2.151084 |
| 19               | 1                | 0              | 6.578885                | 0.138354  | 1.012524  |
| 20               | 1                | 0              | 6.064178                | 0.036026  | -1.444376 |
| 21               | 6                | 0              | 0.637866                | -2.946788 | 0.250095  |
| 22               | 6                | 0              | 0.336202                | -4.308838 | 0.272938  |

|    |   |   |           |           |           |
|----|---|---|-----------|-----------|-----------|
| 23 | 6 | 0 | -0.092832 | -4.923080 | -0.904037 |
| 24 | 1 | 0 | 0.441541  | -4.876758 | 1.192227  |
| 25 | 6 | 0 | 0.095164  | -2.802697 | -2.002928 |
| 26 | 6 | 0 | -0.208840 | -4.160044 | -2.066272 |
| 27 | 1 | 0 | -0.332117 | -5.982040 | -0.912207 |
| 28 | 1 | 0 | 0.020806  | -2.142355 | -2.862255 |
| 29 | 1 | 0 | -0.533340 | -4.602048 | -3.001863 |
| 30 | 7 | 0 | 2.924908  | -0.048303 | -0.225810 |
| 31 | 7 | 0 | 0.502936  | -2.211485 | -0.868072 |
| 32 | 6 | 0 | -1.182018 | 0.644144  | 1.471233  |
| 33 | 1 | 0 | -2.162735 | 0.737520  | 1.956982  |
| 34 | 1 | 0 | -0.635902 | 1.565531  | 1.684451  |
| 35 | 7 | 0 | -1.316573 | 0.532250  | -0.002697 |
| 36 | 6 | 0 | -1.568309 | 1.848612  | -0.622626 |
| 37 | 1 | 0 | -1.729002 | 1.668689  | -1.692674 |
| 38 | 1 | 0 | -2.475473 | 2.323712  | -0.226022 |
| 39 | 6 | 0 | -2.349506 | -0.465970 | -0.437376 |
| 40 | 1 | 0 | -2.241431 | -0.548789 | -1.522630 |
| 41 | 1 | 0 | -2.060920 | -1.431869 | -0.016778 |
| 42 | 6 | 0 | -3.789640 | -0.157571 | -0.072187 |
| 43 | 6 | 0 | -4.608646 | 0.576713  | -0.943021 |
| 44 | 6 | 0 | -4.342013 | -0.619421 | 1.132163  |
| 45 | 6 | 0 | -5.933182 | 0.861981  | -0.609844 |
| 46 | 1 | 0 | -4.213200 | 0.911940  | -1.898684 |
| 47 | 6 | 0 | -5.665904 | -0.334788 | 1.470305  |
| 48 | 1 | 0 | -3.739394 | -1.226943 | 1.803901  |
| 49 | 6 | 0 | -6.463088 | 0.411452  | 0.600879  |
| 50 | 1 | 0 | -6.553908 | 1.425697  | -1.299777 |
| 51 | 1 | 0 | -6.077127 | -0.704649 | 2.404787  |
| 52 | 1 | 0 | -7.495056 | 0.628748  | 0.858730  |
| 53 | 6 | 0 | -0.392629 | 2.788532  | -0.491697 |
| 54 | 6 | 0 | -0.572699 | 4.171783  | -0.560953 |
| 55 | 6 | 0 | 0.542339  | 5.005131  | -0.534048 |
| 56 | 1 | 0 | -1.574572 | 4.581650  | -0.641160 |
| 57 | 6 | 0 | 1.898913  | 3.042085  | -0.346018 |
| 58 | 6 | 0 | 1.807492  | 4.427347  | -0.426942 |
| 59 | 1 | 0 | 0.426757  | 6.082762  | -0.593602 |
| 60 | 1 | 0 | 2.864769  | 2.555394  | -0.263490 |
| 61 | 1 | 0 | 2.706516  | 5.033379  | -0.402128 |
| 62 | 7 | 0 | 0.826985  | 2.230917  | -0.375419 |
| 63 | 1 | 0 | 0.668787  | 0.199266  | -2.347778 |

-----  
**3'**<sub>dp-A</sub> (doublet) E(B3LYP/ SDD-6-31G(d,p))= -1466.42701655 hartree  
 -----

| Center<br>Number | Atomic<br>Number | Atomic<br>Type | Coordinates (Angstroms) |           |           |
|------------------|------------------|----------------|-------------------------|-----------|-----------|
|                  |                  |                | X                       | Y         | Z         |
| 1                | 7                | 0              | 0.875516                | -0.667966 | 1.404774  |
| 2                | 6                | 0              | 1.932481                | 0.136031  | 2.053479  |
| 3                | 1                | 0              | 1.569376                | 1.167061  | 2.128133  |
| 4                | 1                | 0              | 2.135807                | -0.210328 | 3.078769  |
| 5                | 6                | 0              | 1.256837                | -2.105031 | 1.369220  |
| 6                | 1                | 0              | 2.347861                | -2.173885 | 1.338162  |
| 7                | 1                | 0              | 0.934625                | -2.628117 | 2.279557  |
| 8                | 6                | 0              | -0.457211               | -0.506842 | 2.050213  |
| 9                | 1                | 0              | -0.996641               | -1.447658 | 1.914225  |
| 10               | 1                | 0              | -0.349555               | -0.361368 | 3.134664  |
| 11               | 27               | 0              | 0.791661                | -0.044160 | -0.683648 |
| 12               | 6                | 0              | 3.212679                | 0.104579  | 1.233237  |
| 13               | 6                | 0              | 4.468770                | 0.253180  | 1.823704  |
| 14               | 6                | 0              | 4.155490                | -0.115678 | -0.867966 |
| 15               | 6                | 0              | 5.602444                | 0.224495  | 1.010759  |
| 16               | 1                | 0              | 4.557181                | 0.383431  | 2.898017  |
| 17               | 6                | 0              | 5.446259                | 0.031711  | -0.361755 |
| 18               | 1                | 0              | 3.977187                | -0.266173 | -1.929187 |
| 19               | 1                | 0              | 6.590862                | 0.340007  | 1.444537  |
| 20               | 1                | 0              | 6.301525                | -0.008392 | -1.027561 |
| 21               | 6                | 0              | 0.720153                | -2.784060 | 0.132983  |
| 22               | 6                | 0              | 0.456404                | -4.151985 | 0.091263  |
| 23               | 6                | 0              | 0.061581                | -4.732823 | -1.113018 |
| 24               | 1                | 0              | 0.566670                | -4.750454 | 0.990047  |
| 25               | 6                | 0              | 0.204811                | -2.559419 | -2.119504 |
| 26               | 6                | 0              | -0.059022               | -3.920005 | -2.239345 |
| 27               | 1                | 0              | -0.146265               | -5.796552 | -1.169520 |
| 28               | 1                | 0              | 0.119414                | -1.882320 | -2.959787 |
| 29               | 1                | 0              | -0.357843               | -4.325485 | -3.199598 |
| 30               | 7                | 0              | 3.061145                | -0.072392 | -0.092871 |
| 31               | 7                | 0              | 0.583661                | -1.990937 | -0.955435 |
| 32               | 6                | 0              | -1.276348               | 0.633305  | 1.449423  |
| 33               | 1                | 0              | -2.236080               | 0.706132  | 1.980845  |
| 34               | 1                | 0              | -0.756548               | 1.581256  | 1.612073  |
| 35               | 7                | 0              | -1.455886               | 0.452801  | -0.004206 |
| 36               | 6                | 0              | -1.662890               | 1.727673  | -0.697509 |
| 37               | 1                | 0              | -1.860936               | 1.495419  | -1.751511 |
| 38               | 1                | 0              | -2.533440               | 2.285143  | -0.321290 |
| 39               | 6                | 0              | -2.489375               | -0.557340 | -0.369547 |
| 40               | 1                | 0              | -2.413315               | -0.691333 | -1.453002 |
| 41               | 1                | 0              | -2.192729               | -1.507436 | 0.083889  |

|    |   |   |           |           |           |
|----|---|---|-----------|-----------|-----------|
| 42 | 6 | 0 | -3.921701 | -0.233115 | 0.017606  |
| 43 | 6 | 0 | -4.750314 | 0.501915  | -0.843427 |
| 44 | 6 | 0 | -4.450886 | -0.666691 | 1.242409  |
| 45 | 6 | 0 | -6.061239 | 0.814417  | -0.481947 |
| 46 | 1 | 0 | -4.374077 | 0.816500  | -1.813932 |
| 47 | 6 | 0 | -5.761309 | -0.355305 | 1.608895  |
| 48 | 1 | 0 | -3.840271 | -1.272606 | 1.908488  |
| 49 | 6 | 0 | -6.567963 | 0.390897  | 0.748351  |
| 50 | 1 | 0 | -6.689960 | 1.378177  | -1.164666 |
| 51 | 1 | 0 | -6.154726 | -0.703845 | 2.559155  |
| 52 | 1 | 0 | -7.589400 | 0.629392  | 1.028507  |
| 53 | 6 | 0 | -0.437645 | 2.609500  | -0.643952 |
| 54 | 6 | 0 | -0.564570 | 3.998397  | -0.703778 |
| 55 | 6 | 0 | 0.576021  | 4.794661  | -0.746841 |
| 56 | 1 | 0 | -1.555294 | 4.441029  | -0.722643 |
| 57 | 6 | 0 | 1.868420  | 2.780722  | -0.643688 |
| 58 | 6 | 0 | 1.820357  | 4.167703  | -0.720484 |
| 59 | 1 | 0 | 0.495388  | 5.875697  | -0.800076 |
| 60 | 1 | 0 | 2.817083  | 2.261752  | -0.630640 |
| 61 | 1 | 0 | 2.743377  | 4.735743  | -0.757847 |
| 62 | 7 | 0 | 0.769124  | 2.000813  | -0.598691 |
| 63 | 1 | 0 | 0.747545  | 0.179946  | -2.166989 |

-----  
**3'**<sub>dp-B</sub> (doublet) E(B3LYP/ SDD-6-31G(d,p))= -1466.42283783 hartree

| Center<br>Number | Atomic<br>Number | Atomic<br>Type | Coordinates (Angstroms) |           |           |
|------------------|------------------|----------------|-------------------------|-----------|-----------|
|                  |                  |                | X                       | Y         | Z         |
| 1                | 7                | 0              | 1.381877                | 1.736962  | -1.211836 |
| 2                | 6                | 0              | 2.678184                | 1.386670  | -1.803499 |
| 3                | 1                | 0              | 2.720245                | 1.628997  | -2.876594 |
| 4                | 1                | 0              | 3.447769                | 1.993273  | -1.313938 |
| 5                | 6                | 0              | 1.330064                | 3.066406  | -0.585724 |
| 6                | 1                | 0              | 2.331538                | 3.293140  | -0.205219 |
| 7                | 1                | 0              | 1.067296                | 3.862312  | -1.299059 |
| 8                | 6                | 0              | 0.226135                | 1.458674  | -2.093010 |
| 9                | 1                | 0              | -0.587888               | 2.124992  | -1.795012 |
| 10               | 1                | 0              | 0.460351                | 1.700273  | -3.141112 |
| 11               | 27               | 0              | 1.169800                | 0.347330  | 0.551932  |
| 12               | 6                | 0              | 3.079067                | -0.065626 | -1.594572 |
| 13               | 6                | 0              | 4.037794                | -0.657884 | -2.418915 |
| 14               | 6                | 0              | 2.999276                | -1.953421 | -0.257156 |
| 15               | 6                | 0              | 4.489908                | -1.943248 | -2.130853 |

|    |   |   |           |           |           |
|----|---|---|-----------|-----------|-----------|
| 16 | 1 | 0 | 4.428764  | -0.107653 | -3.269350 |
| 17 | 6 | 0 | 3.965175  | -2.601437 | -1.018654 |
| 18 | 1 | 0 | 2.564253  | -2.424926 | 0.617136  |
| 19 | 1 | 0 | 5.238479  | -2.418200 | -2.757000 |
| 20 | 1 | 0 | 4.291995  | -3.598193 | -0.743487 |
| 21 | 6 | 0 | 0.386246  | 3.114290  | 0.605338  |
| 22 | 6 | 0 | -0.216814 | 4.311483  | 0.993034  |
| 23 | 6 | 0 | -0.976340 | 4.350552  | 2.160881  |
| 24 | 1 | 0 | -0.080530 | 5.202327  | 0.387725  |
| 25 | 6 | 0 | -0.503313 | 2.020432  | 2.444470  |
| 26 | 6 | 0 | -1.115686 | 3.180693  | 2.906517  |
| 27 | 1 | 0 | -1.447508 | 5.274210  | 2.481484  |
| 28 | 1 | 0 | -0.593514 | 1.084950  | 2.986334  |
| 29 | 1 | 0 | -1.691565 | 3.159495  | 3.825190  |
| 30 | 7 | 0 | 2.549375  | -0.715319 | -0.537502 |
| 31 | 7 | 0 | 0.228283  | 1.976211  | 1.316381  |
| 32 | 6 | 0 | -0.243330 | 0.000458  | -2.011438 |
| 33 | 1 | 0 | -1.097361 | -0.145620 | -2.685158 |
| 34 | 1 | 0 | 0.552743  | -0.661657 | -2.359195 |
| 35 | 7 | 0 | -0.566662 | -0.375799 | -0.614099 |
| 36 | 6 | 0 | -0.537795 | -1.839417 | -0.392475 |
| 37 | 1 | 0 | -1.435045 | -2.336371 | -0.780531 |
| 38 | 1 | 0 | 0.316328  | -2.241075 | -0.947345 |
| 39 | 6 | 0 | -1.878342 | 0.201997  | -0.148820 |
| 40 | 1 | 0 | -1.956564 | -0.040801 | 0.913488  |
| 41 | 1 | 0 | -1.793536 | 1.287244  | -0.213070 |
| 42 | 6 | 0 | -3.128266 | -0.258187 | -0.874819 |
| 43 | 6 | 0 | -3.868426 | -1.355216 | -0.407516 |
| 44 | 6 | 0 | -3.597175 | 0.427144  | -2.006261 |
| 45 | 6 | 0 | -5.024528 | -1.773949 | -1.067690 |
| 46 | 1 | 0 | -3.549459 | -1.871671 | 0.494820  |
| 47 | 6 | 0 | -4.751773 | 0.011170  | -2.670345 |
| 48 | 1 | 0 | -3.069011 | 1.309731  | -2.359497 |
| 49 | 6 | 0 | -5.464847 | -1.095249 | -2.205357 |
| 50 | 1 | 0 | -5.587180 | -2.621420 | -0.687737 |
| 51 | 1 | 0 | -5.100701 | 0.557112  | -3.541672 |
| 52 | 1 | 0 | -6.366351 | -1.417135 | -2.717450 |
| 53 | 6 | 0 | -0.345990 | -2.160066 | 1.078705  |
| 54 | 6 | 0 | -0.920652 | -3.282416 | 1.676870  |
| 55 | 6 | 0 | -0.643872 | -3.553390 | 3.017632  |
| 56 | 1 | 0 | -1.569998 | -3.932861 | 1.099093  |
| 57 | 6 | 0 | 0.729241  | -1.589879 | 3.051611  |
| 58 | 6 | 0 | 0.198810  | -2.691961 | 3.719414  |
| 59 | 1 | 0 | -1.079399 | -4.420533 | 3.504237  |

|    |   |   |          |           |          |
|----|---|---|----------|-----------|----------|
| 60 | 1 | 0 | 1.397641 | -0.892282 | 3.548096 |
| 61 | 1 | 0 | 0.442869 | -2.865104 | 4.761933 |
| 62 | 7 | 0 | 0.464374 | -1.322763 | 1.761485 |
| 63 | 1 | 0 | 2.343506 | 0.792770  | 1.365523 |

-----  
**3'**<sub>dp-B</sub> (quartet) E(B3LYP/ SDD-6-31G(d,p))= -1466.42098757 hartree  
 -----

| Center<br>Number | Atomic<br>Number | Atomic<br>Type | Coordinates (Angstroms) |           |           |
|------------------|------------------|----------------|-------------------------|-----------|-----------|
|                  |                  |                | X                       | Y         | Z         |
| 1                | 7                | 0              | 1.444419                | 1.590710  | -1.186747 |
| 2                | 6                | 0              | 2.729251                | 1.207105  | -1.802840 |
| 3                | 1                | 0              | 2.757068                | 1.465534  | -2.871716 |
| 4                | 1                | 0              | 3.515482                | 1.791725  | -1.312867 |
| 5                | 6                | 0              | 1.454149                | 2.999357  | -0.734183 |
| 6                | 1                | 0              | 2.427095                | 3.184013  | -0.265618 |
| 7                | 1                | 0              | 1.349485                | 3.702698  | -1.573456 |
| 8                | 6                | 0              | 0.268179                | 1.306305  | -2.051682 |
| 9                | 1                | 0              | -0.521317               | 2.007658  | -1.770577 |
| 10               | 1                | 0              | 0.509081                | 1.510353  | -3.105474 |
| 11               | 27               | 0              | 1.263306                | 0.457656  | 0.769481  |
| 12               | 6                | 0              | 3.103423                | -0.251900 | -1.611819 |
| 13               | 6                | 0              | 4.021673                | -0.864569 | -2.468794 |
| 14               | 6                | 0              | 3.026183                | -2.127725 | -0.266110 |
| 15               | 6                | 0              | 4.453889                | -2.158141 | -2.186143 |
| 16               | 1                | 0              | 4.396053                | -0.329132 | -3.335958 |
| 17               | 6                | 0              | 3.953436                | -2.802215 | -1.053958 |
| 18               | 1                | 0              | 2.606887                | -2.589532 | 0.622985  |
| 19               | 1                | 0              | 5.170487                | -2.652597 | -2.834430 |
| 20               | 1                | 0              | 4.268781                | -3.805035 | -0.787476 |
| 21               | 6                | 0              | 0.396785                | 3.282282  | 0.315587  |
| 22               | 6                | 0              | -0.149938               | 4.557912  | 0.466380  |
| 23               | 6                | 0              | -1.026287               | 4.801491  | 1.522472  |
| 24               | 1                | 0              | 0.117367                | 5.347225  | -0.229160 |
| 25               | 6                | 0              | -0.767579               | 2.510014  | 2.162251  |
| 26               | 6                | 0              | -1.337974               | 3.757553  | 2.393593  |
| 27               | 1                | 0              | -1.457135               | 5.787789  | 1.662838  |
| 28               | 1                | 0              | -0.988238               | 1.665727  | 2.809030  |
| 29               | 1                | 0              | -2.012127               | 3.900697  | 3.230807  |
| 30               | 7                | 0              | 2.599931                | -0.883144 | -0.538431 |
| 31               | 7                | 0              | 0.077636                | 2.270374  | 1.145961  |
| 32               | 6                | 0              | -0.258125               | -0.128001 | -1.926445 |
| 33               | 1                | 0              | -1.087962               | -0.261764 | -2.633731 |
| 34               | 1                | 0              | 0.521741                | -0.831690 | -2.223334 |



|    |   |   |           |           |           |
|----|---|---|-----------|-----------|-----------|
| 35 | 7 | 0 | -0.652574 | -0.439087 | -0.537813 |
| 36 | 6 | 0 | -0.577507 | -1.872838 | -0.212488 |
| 37 | 1 | 0 | -1.466961 | -2.429547 | -0.533595 |
| 38 | 1 | 0 | 0.273335  | -2.295682 | -0.755898 |
| 39 | 6 | 0 | -1.977019 | 0.143982  | -0.149393 |
| 40 | 1 | 0 | -2.073175 | 0.000619  | 0.931027  |
| 41 | 1 | 0 | -1.917206 | 1.221114  | -0.313331 |
| 42 | 6 | 0 | -3.203233 | -0.413352 | -0.848955 |
| 43 | 6 | 0 | -3.920423 | -1.484181 | -0.293668 |
| 44 | 6 | 0 | -3.664633 | 0.143566  | -2.051796 |
| 45 | 6 | 0 | -5.045682 | -2.004003 | -0.934900 |
| 46 | 1 | 0 | -3.608433 | -1.899708 | 0.661860  |
| 47 | 6 | 0 | -4.788645 | -0.373910 | -2.697229 |
| 48 | 1 | 0 | -3.156453 | 1.006061  | -2.476730 |
| 49 | 6 | 0 | -5.478035 | -1.453791 | -2.142838 |
| 50 | 1 | 0 | -5.590893 | -2.829307 | -0.486755 |
| 51 | 1 | 0 | -5.132910 | 0.073537  | -3.624786 |
| 52 | 1 | 0 | -6.355757 | -1.853699 | -2.641079 |
| 53 | 6 | 0 | -0.334369 | -2.091145 | 1.269239  |
| 54 | 6 | 0 | -0.882012 | -3.171437 | 1.962276  |
| 55 | 6 | 0 | -0.555352 | -3.355575 | 3.306261  |
| 56 | 1 | 0 | -1.551512 | -3.856354 | 1.451590  |
| 57 | 6 | 0 | 0.817674  | -1.398700 | 3.167312  |
| 58 | 6 | 0 | 0.312383  | -2.454034 | 3.922006  |
| 59 | 1 | 0 | -0.972723 | -4.189136 | 3.862677  |
| 60 | 1 | 0 | 1.507275  | -0.670042 | 3.584468  |
| 61 | 1 | 0 | 0.595511  | -2.561379 | 4.963221  |
| 62 | 7 | 0 | 0.498955  | -1.219106 | 1.873360  |
| 63 | 1 | 0 | 2.568076  | 0.970598  | 1.600336  |

-----  
**3'**<sub>dp-c</sub> (quartet) E(B3LYP/ SDD-6-31G(d,p))= -1466.40619378 hartree  
 -----

| Center<br>Number | Atomic<br>Number | Atomic<br>Type | Coordinates (Angstroms) |           |           |
|------------------|------------------|----------------|-------------------------|-----------|-----------|
|                  |                  |                | X                       | Y         | Z         |
| 1                | 7                | 0              | 1.203935                | -1.826709 | 0.444782  |
| 2                | 6                | 0              | 1.984571                | -1.564808 | 1.674494  |
| 3                | 1                | 0              | 1.698646                | -2.264754 | 2.471641  |
| 4                | 1                | 0              | 3.040366                | -1.766076 | 1.462524  |
| 5                | 6                | 0              | 1.997851                | -2.571326 | -0.556773 |
| 6                | 1                | 0              | 2.383344                | -3.521679 | -0.158746 |
| 7                | 1                | 0              | 1.329169                | -2.792733 | -1.395814 |
| 8                | 6                | 0              | -0.109094               | -2.450753 | 0.727782  |
| 9                | 1                | 0              | -0.469282               | -2.894392 | -0.202515 |

|    |    |   |           |           |           |
|----|----|---|-----------|-----------|-----------|
| 10 | 1  | 0 | -0.013245 | -3.265393 | 1.461256  |
| 11 | 27 | 0 | 0.747779  | 0.093130  | -0.648565 |
| 12 | 6  | 0 | 1.905592  | -0.141709 | 2.199814  |
| 13 | 6  | 0 | 2.340088  | 0.142547  | 3.499029  |
| 14 | 6  | 0 | 1.500866  | 2.097804  | 1.797028  |
| 15 | 6  | 0 | 2.359439  | 1.462990  | 3.937454  |
| 16 | 1  | 0 | 2.663415  | -0.664100 | 4.150083  |
| 17 | 6  | 0 | 1.938018  | 2.467006  | 3.063962  |
| 18 | 1  | 0 | 1.147978  | 2.841324  | 1.089237  |
| 19 | 1  | 0 | 2.697013  | 1.705083  | 4.940349  |
| 20 | 1  | 0 | 1.940435  | 3.511106  | 3.356979  |
| 21 | 6  | 0 | 3.134307  | -1.720476 | -1.084578 |
| 22 | 6  | 0 | 4.316087  | -2.285658 | -1.564092 |
| 23 | 6  | 0 | 5.293021  | -1.453644 | -2.109483 |
| 24 | 1  | 0 | 4.463358  | -3.360038 | -1.514160 |
| 25 | 6  | 0 | 3.866239  | 0.406430  | -1.626774 |
| 26 | 6  | 0 | 5.065009  | -0.078203 | -2.141937 |
| 27 | 1  | 0 | 6.217266  | -1.871372 | -2.495970 |
| 28 | 1  | 0 | 3.650619  | 1.471618  | -1.626562 |
| 29 | 1  | 0 | 5.799203  | 0.607665  | -2.550109 |
| 30 | 7  | 0 | 1.477953  | 0.822239  | 1.366807  |
| 31 | 7  | 0 | 2.917054  | -0.391203 | -1.113715 |
| 32 | 6  | 0 | -1.120724 | -1.418707 | 1.236496  |
| 33 | 1  | 0 | -2.054503 | -1.925154 | 1.512162  |
| 34 | 1  | 0 | -0.739528 | -0.944414 | 2.145732  |
| 35 | 7  | 0 | -1.339533 | -0.365458 | 0.222068  |
| 36 | 6  | 0 | -1.790880 | 0.916566  | 0.795813  |
| 37 | 1  | 0 | -2.851355 | 0.899250  | 1.077903  |
| 38 | 1  | 0 | -1.216100 | 1.096321  | 1.710585  |
| 39 | 6  | 0 | -2.230062 | -0.813737 | -0.907571 |
| 40 | 1  | 0 | -2.199776 | -0.019025 | -1.655171 |
| 41 | 1  | 0 | -1.740281 | -1.666978 | -1.377784 |
| 42 | 6  | 0 | -3.661109 | -1.148703 | -0.536553 |
| 43 | 6  | 0 | -4.664785 | -0.168456 | -0.583366 |
| 44 | 6  | 0 | -4.025085 | -2.453621 | -0.168969 |
| 45 | 6  | 0 | -5.983465 | -0.473345 | -0.243053 |
| 46 | 1  | 0 | -4.415884 | 0.836715  | -0.915353 |
| 47 | 6  | 0 | -5.342214 | -2.763086 | 0.173247  |
| 48 | 1  | 0 | -3.277171 | -3.243249 | -0.176050 |
| 49 | 6  | 0 | -6.323612 | -1.770856 | 0.143621  |
| 50 | 1  | 0 | -6.746987 | 0.297355  | -0.292513 |
| 51 | 1  | 0 | -5.604317 | -3.780091 | 0.449286  |
| 52 | 1  | 0 | -7.349908 | -2.011175 | 0.403724  |
| 53 | 6  | 0 | -1.532485 | 2.055046  | -0.174008 |

|    |   |   |           |           |           |
|----|---|---|-----------|-----------|-----------|
| 54 | 6 | 0 | -2.411262 | 3.131487  | -0.306170 |
| 55 | 6 | 0 | -2.107499 | 4.153180  | -1.205697 |
| 56 | 1 | 0 | -3.320966 | 3.161816  | 0.285064  |
| 57 | 6 | 0 | -0.122180 | 2.948898  | -1.785554 |
| 58 | 6 | 0 | -0.941667 | 4.059574  | -1.965283 |
| 59 | 1 | 0 | -2.777563 | 4.999155  | -1.322699 |
| 60 | 1 | 0 | 0.780788  | 2.814836  | -2.374429 |
| 61 | 1 | 0 | -0.675199 | 4.820532  | -2.690403 |
| 62 | 7 | 0 | -0.397684 | 1.977755  | -0.899936 |
| 63 | 1 | 0 | 0.408575  | -0.489668 | -2.130311 |

-----  
**3'**<sub>dp-c</sub> (doublet) E(B3LYP/ SDD-6-31G(d,p))= -1466.40963436 hartree  
 -----

| Center<br>Number | Atomic<br>Number | Atomic<br>Type | Coordinates (Angstroms) |           |           |
|------------------|------------------|----------------|-------------------------|-----------|-----------|
|                  |                  |                | X                       | Y         | Z         |
| 1                | 7                | 0              | 1.101442                | -1.809936 | 0.028081  |
| 2                | 6                | 0              | 1.659049                | -1.821068 | 1.401488  |
| 3                | 1                | 0              | 1.168415                | -2.584398 | 2.019568  |
| 4                | 1                | 0              | 2.714797                | -2.113211 | 1.354328  |
| 5                | 6                | 0              | 2.033194                | -2.441870 | -0.929666 |
| 6                | 1                | 0              | 2.277154                | -3.479821 | -0.653230 |
| 7                | 1                | 0              | 1.530171                | -2.467371 | -1.902555 |
| 8                | 6                | 0              | -0.218314               | -2.481425 | -0.034192 |
| 9                | 1                | 0              | -0.475004               | -2.594437 | -1.090621 |
| 10               | 1                | 0              | -0.146476               | -3.494457 | 0.396883  |
| 11               | 27               | 0              | 1.309421                | 0.411836  | -0.676518 |
| 12               | 6                | 0              | 1.603794                | -0.484916 | 2.118161  |
| 13               | 6                | 0              | 1.686847                | -0.429016 | 3.512473  |
| 14               | 6                | 0              | 1.574820                | 1.830375  | 1.992708  |
| 15               | 6                | 0              | 1.724676                | 0.807917  | 4.150013  |
| 16               | 1                | 0              | 1.723137                | -1.350175 | 4.085757  |
| 17               | 6                | 0              | 1.673640                | 1.965157  | 3.372069  |
| 18               | 1                | 0              | 1.513052                | 2.702772  | 1.349747  |
| 19               | 1                | 0              | 1.790296                | 0.868175  | 5.231761  |
| 20               | 1                | 0              | 1.702274                | 2.952113  | 3.820190  |
| 21               | 6                | 0              | 3.299366                | -1.633543 | -1.070996 |
| 22               | 6                | 0              | 4.536539                | -2.213759 | -1.349680 |
| 23               | 6                | 0              | 5.653207                | -1.395829 | -1.510099 |
| 24               | 1                | 0              | 4.616144                | -3.292301 | -1.440431 |
| 25               | 6                | 0              | 4.237648                | 0.488036  | -1.081611 |
| 26               | 6                | 0              | 5.500692                | -0.016438 | -1.369527 |
| 27               | 1                | 0              | 6.623957                | -1.826591 | -1.733430 |
| 28               | 1                | 0              | 4.073126                | 1.554470  | -0.964815 |

|    |   |   |           |           |           |
|----|---|---|-----------|-----------|-----------|
| 29 | 1 | 0 | 6.340510  | 0.660600  | -1.478505 |
| 30 | 7 | 0 | 1.538204  | 0.635515  | 1.369256  |
| 31 | 7 | 0 | 3.155049  | -0.299234 | -0.939247 |
| 32 | 6 | 0 | -1.340467 | -1.705332 | 0.662471  |
| 33 | 1 | 0 | -2.198890 | -2.380682 | 0.791138  |
| 34 | 1 | 0 | -1.032134 | -1.430618 | 1.676481  |
| 35 | 7 | 0 | -1.688313 | -0.502915 | -0.079030 |
| 36 | 6 | 0 | -1.797334 | 0.733901  | 0.667452  |
| 37 | 1 | 0 | -2.814559 | 0.941498  | 1.037223  |
| 38 | 1 | 0 | -1.156334 | 0.660172  | 1.551362  |
| 39 | 6 | 0 | -2.683803 | -0.681695 | -1.154624 |
| 40 | 1 | 0 | -2.641603 | 0.208777  | -1.791280 |
| 41 | 1 | 0 | -2.348416 | -1.516394 | -1.779310 |
| 42 | 6 | 0 | -4.113708 | -0.925312 | -0.700170 |
| 43 | 6 | 0 | -4.987714 | 0.148229  | -0.470662 |
| 44 | 6 | 0 | -4.591998 | -2.227503 | -0.489540 |
| 45 | 6 | 0 | -6.289441 | -0.069074 | -0.016552 |
| 46 | 1 | 0 | -4.655250 | 1.162890  | -0.677624 |
| 47 | 6 | 0 | -5.892919 | -2.449980 | -0.035043 |
| 48 | 1 | 0 | -3.950456 | -3.078028 | -0.708338 |
| 49 | 6 | 0 | -6.742897 | -1.369984 | 0.209171  |
| 50 | 1 | 0 | -6.953368 | 0.774587  | 0.148254  |
| 51 | 1 | 0 | -6.246592 | -3.465718 | 0.115575  |
| 52 | 1 | 0 | -7.756998 | -1.541559 | 0.557048  |
| 53 | 6 | 0 | -1.336620 | 1.922104  | -0.159166 |
| 54 | 6 | 0 | -2.125208 | 3.072321  | -0.249865 |
| 55 | 6 | 0 | -1.706043 | 4.152075  | -1.023210 |
| 56 | 1 | 0 | -3.068982 | 3.105851  | 0.284758  |
| 57 | 6 | 0 | 0.230294  | 2.868233  | -1.587568 |
| 58 | 6 | 0 | -0.501245 | 4.043546  | -1.714102 |
| 59 | 1 | 0 | -2.315003 | 5.047351  | -1.100437 |
| 60 | 1 | 0 | 1.155164  | 2.728752  | -2.137434 |
| 61 | 1 | 0 | -0.135535 | 4.840091  | -2.352460 |
| 62 | 7 | 0 | -0.154736 | 1.830217  | -0.812604 |
| 63 | 1 | 0 | 1.135182  | 0.201641  | -2.147220 |

-----  
**TS'<sub>A</sub>** (quartet) E(B3LYP/ SDD-6-31G(d,p))= -1466.73527484 hartree  
 -----

| Center<br>Number | Atomic<br>Number | Atomic<br>Type | Coordinates (Angstroms) |           |           |
|------------------|------------------|----------------|-------------------------|-----------|-----------|
|                  |                  |                | X                       | Y         | Z         |
| 1                | 7                | 0              | -1.744049               | -1.085369 | -1.259977 |
| 2                | 6                | 0              | -2.488822               | -0.258103 | -2.237532 |
| 3                | 1                | 0              | -1.780407               | 0.155844  | -2.961921 |

|    |    |   |           |           |           |
|----|----|---|-----------|-----------|-----------|
| 4  | 1  | 0 | -3.200485 | -0.860591 | -2.815826 |
| 5  | 6  | 0 | -2.626232 | -2.108049 | -0.648763 |
| 6  | 1  | 0 | -3.638741 | -1.690370 | -0.598934 |
| 7  | 1  | 0 | -2.686090 | -3.009541 | -1.272326 |
| 8  | 6  | 0 | -0.497793 | -1.671895 | -1.815343 |
| 9  | 1  | 0 | -0.182005 | -2.471442 | -1.139903 |
| 10 | 1  | 0 | -0.672423 | -2.133548 | -2.797072 |
| 11 | 27 | 0 | -1.051336 | 0.234269  | 0.375351  |
| 12 | 6  | 0 | -3.195748 | 0.893150  | -1.550517 |
| 13 | 6  | 0 | -4.333828 | 1.491986  | -2.084307 |
| 14 | 6  | 0 | -3.171465 | 2.410524  | 0.220903  |
| 15 | 6  | 0 | -4.891518 | 2.593820  | -1.434002 |
| 16 | 1  | 0 | -4.776070 | 1.102673  | -2.995700 |
| 17 | 6  | 0 | -4.299280 | 3.063462  | -0.260600 |
| 18 | 1  | 0 | -2.681877 | 2.728236  | 1.136077  |
| 19 | 1  | 0 | -5.778262 | 3.074415  | -1.835038 |
| 20 | 1  | 0 | -4.704521 | 3.913096  | 0.277129  |
| 21 | 6  | 0 | -2.198688 | -2.454881 | 0.760720  |
| 22 | 6  | 0 | -2.515639 | -3.674293 | 1.354222  |
| 23 | 6  | 0 | -2.181458 | -3.885481 | 2.692544  |
| 24 | 1  | 0 | -3.022718 | -4.442620 | 0.779574  |
| 25 | 6  | 0 | -1.238306 | -1.685427 | 2.740857  |
| 26 | 6  | 0 | -1.535345 | -2.870952 | 3.401283  |
| 27 | 1  | 0 | -2.422863 | -4.827613 | 3.174421  |
| 28 | 1  | 0 | -0.733698 | -0.867972 | 3.246094  |
| 29 | 1  | 0 | -1.263088 | -2.993669 | 4.443441  |
| 30 | 7  | 0 | -2.626633 | 1.348173  | -0.410270 |
| 31 | 7  | 0 | -1.558818 | -1.480599 | 1.445337  |
| 32 | 6  | 0 | 0.591455  | -0.611993 | -1.941005 |
| 33 | 1  | 0 | 1.502961  | -1.064563 | -2.344805 |
| 34 | 1  | 0 | 0.279606  | 0.155795  | -2.653953 |
| 35 | 7  | 0 | 0.885712  | 0.079767  | -0.641180 |
| 36 | 6  | 0 | 1.553217  | 1.379473  | -0.998256 |
| 37 | 1  | 0 | 2.405179  | 1.168877  | -1.654584 |
| 38 | 1  | 0 | 0.827853  | 1.949658  | -1.591420 |
| 39 | 6  | 0 | 1.770439  | -0.785368 | 0.259629  |
| 40 | 1  | 0 | 1.939515  | -0.199960 | 1.166230  |
| 41 | 1  | 0 | 1.162994  | -1.648918 | 0.542281  |
| 42 | 6  | 0 | 3.087613  | -1.261039 | -0.316987 |
| 43 | 6  | 0 | 4.260592  | -0.506436 | -0.161118 |
| 44 | 6  | 0 | 3.170012  | -2.500669 | -0.972624 |
| 45 | 6  | 0 | 5.475231  | -0.963470 | -0.673696 |
| 46 | 1  | 0 | 4.233114  | 0.430189  | 0.388039  |
| 47 | 6  | 0 | 4.382909  | -2.958967 | -1.487181 |

|    |   |   |           |           |           |
|----|---|---|-----------|-----------|-----------|
| 48 | 1 | 0 | 2.286596  | -3.129732 | -1.059819 |
| 49 | 6 | 0 | 5.537346  | -2.186876 | -1.343719 |
| 50 | 1 | 0 | 6.375749  | -0.373088 | -0.536478 |
| 51 | 1 | 0 | 4.429990  | -3.922271 | -1.985042 |
| 52 | 1 | 0 | 6.483552  | -2.545058 | -1.736415 |
| 53 | 6 | 0 | 2.045703  | 2.274095  | 0.125309  |
| 54 | 6 | 0 | 3.213577  | 3.021449  | -0.049540 |
| 55 | 6 | 0 | 3.606754  | 3.922868  | 0.941178  |
| 56 | 1 | 0 | 3.805772  | 2.900861  | -0.950602 |
| 57 | 6 | 0 | 1.689923  | 3.267048  | 2.207015  |
| 58 | 6 | 0 | 2.833755  | 4.049302  | 2.095661  |
| 59 | 1 | 0 | 4.508527  | 4.513298  | 0.813755  |
| 60 | 1 | 0 | 1.048932  | 3.315359  | 3.083543  |
| 61 | 1 | 0 | 3.108513  | 4.732990  | 2.890909  |
| 62 | 7 | 0 | 1.309039  | 2.414137  | 1.242022  |
| 63 | 1 | 0 | 0.078484  | 1.648067  | 1.505104  |
| 64 | 1 | 0 | -0.671186 | 1.233914  | 1.772462  |

-----

$TS'_B$  (quartet) E(B3LYP/ SDD-6-31G(d,p))= -1466.72898904 hartree

| Center<br>Number | Atomic<br>Number | Atomic<br>Type | Coordinates (Angstroms) |           |           |
|------------------|------------------|----------------|-------------------------|-----------|-----------|
|                  |                  |                | X                       | Y         | Z         |
| 1                | 7                | 0              | -1.463206               | -1.241055 | -0.605623 |
| 2                | 6                | 0              | -2.378869               | -1.176195 | -1.797933 |
| 3                | 1                | 0              | -1.844591               | -0.639360 | -2.588987 |
| 4                | 1                | 0              | -2.551741               | -2.194960 | -2.167423 |
| 5                | 6                | 0              | -2.166576               | -1.845975 | 0.556030  |
| 6                | 1                | 0              | -3.208470               | -1.513887 | 0.533144  |
| 7                | 1                | 0              | -2.183974               | -2.941338 | 0.484749  |
| 8                | 6                | 0              | -0.262222               | -2.065631 | -0.964823 |
| 9                | 1                | 0              | 0.139196                | -2.489821 | -0.040939 |
| 10               | 1                | 0              | -0.555096               | -2.912578 | -1.598670 |
| 11               | 27               | 0              | -0.453139               | 0.660696  | 0.138670  |
| 12               | 6                | 0              | -3.726631               | -0.518677 | -1.562152 |
| 13               | 6                | 0              | -4.900534               | -1.134595 | -2.000422 |
| 14               | 6                | 0              | -4.905291               | 1.317087  | -0.792133 |
| 15               | 6                | 0              | -6.117195               | -0.469868 | -1.826948 |
| 16               | 1                | 0              | -4.866928               | -2.110030 | -2.475443 |
| 17               | 6                | 0              | -6.122614               | 0.779191  | -1.209801 |
| 18               | 1                | 0              | -4.862765               | 2.289806  | -0.308984 |
| 19               | 1                | 0              | -7.042400               | -0.924151 | -2.166952 |
| 20               | 1                | 0              | -7.044295               | 1.329004  | -1.054315 |

|    |   |   |           |           |           |
|----|---|---|-----------|-----------|-----------|
| 21 | 6 | 0 | -1.586629 | -1.416160 | 1.884306  |
| 22 | 6 | 0 | -1.793650 | -2.162422 | 3.044099  |
| 23 | 6 | 0 | -1.332219 | -1.673344 | 4.265071  |
| 24 | 1 | 0 | -2.317291 | -3.111309 | 2.988639  |
| 25 | 6 | 0 | -0.474815 | 0.234784  | 3.106219  |
| 26 | 6 | 0 | -0.663314 | -0.447227 | 4.299070  |
| 27 | 1 | 0 | -1.490206 | -2.240702 | 5.176831  |
| 28 | 1 | 0 | 0.054847  | 1.181857  | 3.078979  |
| 29 | 1 | 0 | -0.289087 | -0.031007 | 5.227453  |
| 30 | 7 | 0 | -3.735002 | 0.686240  | -0.964095 |
| 31 | 7 | 0 | -0.927056 | -0.235660 | 1.920591  |
| 32 | 6 | 0 | 0.816268  | -1.243333 | -1.667467 |
| 33 | 1 | 0 | 1.649291  | -1.888938 | -1.965043 |
| 34 | 1 | 0 | 0.418641  | -0.791055 | -2.579998 |
| 35 | 7 | 0 | 1.276869  | -0.147293 | -0.771148 |
| 36 | 6 | 0 | 1.852038  | 1.013790  | -1.504943 |
| 37 | 1 | 0 | 2.880981  | 0.814097  | -1.820891 |
| 38 | 1 | 0 | 1.261317  | 1.168622  | -2.415872 |
| 39 | 6 | 0 | 2.241893  | -0.633897 | 0.310422  |
| 40 | 1 | 0 | 2.409328  | 0.221310  | 0.971083  |
| 41 | 1 | 0 | 1.707054  | -1.388493 | 0.891260  |
| 42 | 6 | 0 | 3.562249  | -1.184939 | -0.175858 |
| 43 | 6 | 0 | 4.679876  | -0.345697 | -0.312531 |
| 44 | 6 | 0 | 3.706985  | -2.552307 | -0.460935 |
| 45 | 6 | 0 | 5.901579  | -0.853772 | -0.754982 |
| 46 | 1 | 0 | 4.605138  | 0.705290  | -0.041792 |
| 47 | 6 | 0 | 4.928069  | -3.061675 | -0.903690 |
| 48 | 1 | 0 | 2.871723  | -3.232462 | -0.308511 |
| 49 | 6 | 0 | 6.024863  | -2.211300 | -1.058156 |
| 50 | 1 | 0 | 6.759569  | -0.195546 | -0.847957 |
| 51 | 1 | 0 | 5.027433  | -4.121890 | -1.113427 |
| 52 | 1 | 0 | 6.976778  | -2.608339 | -1.395769 |
| 53 | 6 | 0 | 1.784618  | 2.276114  | -0.662343 |
| 54 | 6 | 0 | 2.696211  | 3.318100  | -0.817418 |
| 55 | 6 | 0 | 2.532091  | 4.484297  | -0.068807 |
| 56 | 1 | 0 | 3.517952  | 3.218307  | -1.519043 |
| 57 | 6 | 0 | 0.591760  | 3.499831  | 0.929865  |
| 58 | 6 | 0 | 1.460228  | 4.578137  | 0.821112  |
| 59 | 1 | 0 | 3.231022  | 5.307504  | -0.178011 |
| 60 | 1 | 0 | -0.259643 | 3.531033  | 1.603205  |
| 61 | 1 | 0 | 1.297711  | 5.467463  | 1.419490  |
| 62 | 7 | 0 | 0.749826  | 2.369683  | 0.208614  |
| 63 | 1 | 0 | -2.080154 | 1.440849  | -0.978446 |
| 64 | 1 | 0 | -1.375619 | 1.772626  | -1.119938 |

-----  
TS'\_B (doublet) E(B3LYP/SDD-6-31G(d,p))= -1466.72295049 hartree  
-----

| Center<br>Number | Atomic<br>Number | Atomic<br>Type | Coordinates (Angstroms) |           |           |
|------------------|------------------|----------------|-------------------------|-----------|-----------|
|                  |                  |                | X                       | Y         | Z         |
| 1                | 7                | 0              | -1.383445               | -1.180646 | -0.790121 |
| 2                | 6                | 0              | -2.356060               | -0.893463 | -1.898878 |
| 3                | 1                | 0              | -1.836810               | -0.262168 | -2.627682 |
| 4                | 1                | 0              | -2.589419               | -1.836354 | -2.408691 |
| 5                | 6                | 0              | -2.000561               | -2.095136 | 0.217920  |
| 6                | 1                | 0              | -3.007201               | -1.723127 | 0.433162  |
| 7                | 1                | 0              | -2.113162               | -3.104026 | -0.199289 |
| 8                | 6                | 0              | -0.168123               | -1.836856 | -1.400381 |
| 9                | 1                | 0              | 0.301696                | -2.443459 | -0.624096 |
| 10               | 1                | 0              | -0.466348               | -2.517794 | -2.206416 |
| 11               | 27               | 0              | -0.571863               | 0.438659  | 0.214262  |
| 12               | 6                | 0              | -3.666765               | -0.222379 | -1.528916 |
| 13               | 6                | 0              | -4.839432               | -0.557093 | -2.207323 |
| 14               | 6                | 0              | -4.785882               | 1.420767  | -0.314746 |
| 15               | 6                | 0              | -6.011785               | 0.148129  | -1.926663 |
| 16               | 1                | 0              | -4.836799               | -1.350671 | -2.947660 |
| 17               | 6                | 0              | -5.987773               | 1.158487  | -0.965227 |
| 18               | 1                | 0              | -4.710400               | 2.181777  | 0.457125  |
| 19               | 1                | 0              | -6.931820               | -0.094904 | -2.448599 |
| 20               | 1                | 0              | -6.878021               | 1.725207  | -0.716722 |
| 21               | 6                | 0              | -1.207798               | -2.130302 | 1.508439  |
| 22               | 6                | 0              | -1.292516               | -3.209569 | 2.387651  |
| 23               | 6                | 0              | -0.614667               | -3.142995 | 3.604815  |
| 24               | 1                | 0              | -1.883390               | -4.082088 | 2.127438  |
| 25               | 6                | 0              | 0.183031                | -0.977970 | 2.962408  |
| 26               | 6                | 0              | 0.133756                | -2.002962 | 3.901233  |
| 27               | 1                | 0              | -0.669107               | -3.967382 | 4.308571  |
| 28               | 1                | 0              | 0.762815                | -0.078567 | 3.146057  |
| 29               | 1                | 0              | 0.674237                | -1.909319 | 4.836525  |
| 30               | 7                | 0              | -3.658781               | 0.751207  | -0.602981 |
| 31               | 7                | 0              | -0.470818               | -1.035790 | 1.787206  |
| 32               | 6                | 0              | 0.805667                | -0.784630 | -1.910815 |
| 33               | 1                | 0              | 1.698946                | -1.251693 | -2.336990 |
| 34               | 1                | 0              | 0.348916                | -0.184529 | -2.702297 |
| 35               | 7                | 0              | 1.157090                | 0.124672  | -0.778430 |
| 36               | 6                | 0              | 1.543008                | 1.496709  | -1.233154 |
| 37               | 1                | 0              | 2.574618                | 1.523055  | -1.596263 |



|    |   |   |           |           |           |
|----|---|---|-----------|-----------|-----------|
| 38 | 1 | 0 | 0.895106  | 1.774516  | -2.072804 |
| 39 | 6 | 0 | 2.249698  | -0.468401 | 0.115634  |
| 40 | 1 | 0 | 2.342638  | 0.216612  | 0.961004  |
| 41 | 1 | 0 | 1.849628  | -1.404140 | 0.505483  |
| 42 | 6 | 0 | 3.593172  | -0.693991 | -0.536761 |
| 43 | 6 | 0 | 4.582746  | 0.302277  | -0.502961 |
| 44 | 6 | 0 | 3.896697  | -1.923002 | -1.145296 |
| 45 | 6 | 0 | 5.828326  | 0.089838  | -1.094330 |
| 46 | 1 | 0 | 4.391610  | 1.238493  | 0.016974  |
| 47 | 6 | 0 | 5.141424  | -2.136825 | -1.738100 |
| 48 | 1 | 0 | 3.169929  | -2.732468 | -1.129739 |
| 49 | 6 | 0 | 6.105896  | -1.127211 | -1.720357 |
| 50 | 1 | 0 | 6.586198  | 0.865717  | -1.053296 |
| 51 | 1 | 0 | 5.363772  | -3.094151 | -2.198563 |
| 52 | 1 | 0 | 7.076865  | -1.295358 | -2.175036 |
| 53 | 6 | 0 | 1.318867  | 2.460936  | -0.092868 |
| 54 | 6 | 0 | 2.044292  | 3.633906  | 0.088708  |
| 55 | 6 | 0 | 1.718080  | 4.473945  | 1.155120  |
| 56 | 1 | 0 | 2.848304  | 3.885183  | -0.595010 |
| 57 | 6 | 0 | -0.004134 | 2.925109  | 1.776321  |
| 58 | 6 | 0 | 0.679194  | 4.111771  | 2.013815  |
| 59 | 1 | 0 | 2.269355  | 5.395115  | 1.314623  |
| 60 | 1 | 0 | -0.819690 | 2.602482  | 2.413846  |
| 61 | 1 | 0 | 0.398224  | 4.735564  | 2.854841  |
| 62 | 7 | 0 | 0.307163  | 2.114152  | 0.743676  |
| 63 | 1 | 0 | -2.454704 | 0.880201  | 0.288992  |
| 64 | 1 | 0 | -1.904278 | 0.934771  | 0.982268  |

-----  
**TS'<sub>c</sub>** (quartet) E(B3LYP/ SDD-6-31G(d,p))= -1466.73134930 hartree

| Center<br>Number | Atomic<br>Number | Atomic<br>Type | Coordinates (Angstroms) |          |           |
|------------------|------------------|----------------|-------------------------|----------|-----------|
|                  |                  |                | X                       | Y        | Z         |
| 1                | 7                | 0              | 1.292577                | 1.333444 | -1.002984 |
| 2                | 6                | 0              | 2.299651                | 0.830129 | -1.979716 |
| 3                | 1                | 0              | 1.783382                | 0.225989 | -2.733019 |
| 4                | 1                | 0              | 2.773540                | 1.658733 | -2.520931 |
| 5                | 6                | 0              | 1.858396                | 2.570972 | -0.373053 |
| 6                | 1                | 0              | 2.796854                | 2.277933 | 0.111297  |
| 7                | 1                | 0              | 2.116808                | 3.289359 | -1.162355 |
| 8                | 6                | 0              | -0.004795               | 1.607455 | -1.685131 |
| 9                | 1                | 0              | -0.586999               | 2.261835 | -1.034254 |
| 10               | 1                | 0              | 0.148593                | 2.151793 | -2.627319 |

|    |    |   |           |           |           |
|----|----|---|-----------|-----------|-----------|
| 11 | 27 | 0 | 0.937727  | -0.562931 | 0.301798  |
| 12 | 6  | 0 | 3.343152  | -0.041438 | -1.321924 |
| 13 | 6  | 0 | 4.673402  | -0.066763 | -1.731282 |
| 14 | 6  | 0 | 3.735531  | -1.741676 | 0.222835  |
| 15 | 6  | 0 | 5.552118  | -0.971251 | -1.132585 |
| 16 | 1  | 0 | 5.014723  | 0.608191  | -2.509163 |
| 17 | 6  | 0 | 5.074156  | -1.827313 | -0.139675 |
| 18 | 1  | 0 | 3.320733  | -2.387613 | 0.989580  |
| 19 | 1  | 0 | 6.593347  | -1.006182 | -1.436975 |
| 20 | 1  | 0 | 5.722466  | -2.546224 | 0.348254  |
| 21 | 6  | 0 | 0.977656  | 3.277098  | 0.638156  |
| 22 | 6  | 0 | 0.724313  | 4.645892  | 0.537223  |
| 23 | 6  | 0 | -0.012960 | 5.277734  | 1.542342  |
| 24 | 1  | 0 | 1.106417  | 5.212637  | -0.305720 |
| 25 | 6  | 0 | -0.202292 | 3.158739  | 2.637749  |
| 26 | 6  | 0 | -0.485214 | 4.523319  | 2.614806  |
| 27 | 1  | 0 | -0.211858 | 6.343229  | 1.485909  |
| 28 | 1  | 0 | -0.545227 | 2.525202  | 3.451711  |
| 29 | 1  | 0 | -1.056894 | 4.975727  | 3.417446  |
| 30 | 7  | 0 | 2.885578  | -0.865060 | -0.352135 |
| 31 | 7  | 0 | 0.510588  | 2.557034  | 1.674746  |
| 32 | 6  | 0 | -0.777260 | 0.317915  | -1.966585 |
| 33 | 1  | 0 | -1.754740 | 0.559955  | -2.397677 |
| 34 | 1  | 0 | -0.251598 | -0.292944 | -2.705979 |
| 35 | 7  | 0 | -0.924585 | -0.500566 | -0.730462 |
| 36 | 6  | 0 | -1.191988 | -1.935319 | -1.036131 |
| 37 | 1  | 0 | -2.232489 | -2.088762 | -1.340406 |
| 38 | 1  | 0 | -0.562575 | -2.224189 | -1.886431 |
| 39 | 6  | 0 | -1.979556 | 0.063770  | 0.221974  |
| 40 | 1  | 0 | -1.923661 | -0.543647 | 1.129566  |
| 41 | 1  | 0 | -1.646229 | 1.068870  | 0.488537  |
| 42 | 6  | 0 | -3.398213 | 0.092575  | -0.298577 |
| 43 | 6  | 0 | -4.266553 | -0.985404 | -0.061483 |
| 44 | 6  | 0 | -3.887577 | 1.211649  | -0.991528 |
| 45 | 6  | 0 | -5.579824 | -0.958979 | -0.531788 |
| 46 | 1  | 0 | -3.924460 | -1.838271 | 0.520682  |
| 47 | 6  | 0 | -5.200155 | 1.239078  | -1.463652 |
| 48 | 1  | 0 | -3.251608 | 2.081627  | -1.139732 |
| 49 | 6  | 0 | -6.045846 | 0.150594  | -1.239975 |
| 50 | 1  | 0 | -6.242690 | -1.795222 | -0.333264 |
| 51 | 1  | 0 | -5.566753 | 2.113307  | -1.992174 |
| 52 | 1  | 0 | -7.069123 | 0.174458  | -1.600701 |
| 53 | 6  | 0 | -0.849066 | -2.817133 | 0.150671  |
| 54 | 6  | 0 | -1.508922 | -4.018511 | 0.399721  |

|    |   |   |           |           |           |
|----|---|---|-----------|-----------|-----------|
| 55 | 6 | 0 | -1.117298 | -4.796890 | 1.489809  |
| 56 | 1 | 0 | -2.317115 | -4.337444 | -0.250287 |
| 57 | 6 | 0 | 0.523514  | -3.133974 | 2.011726  |
| 58 | 6 | 0 | -0.085922 | -4.344661 | 2.315206  |
| 59 | 1 | 0 | -1.617874 | -5.737038 | 1.698775  |
| 60 | 1 | 0 | 1.317256  | -2.732675 | 2.634677  |
| 61 | 1 | 0 | 0.236568  | -4.912328 | 3.180737  |
| 62 | 7 | 0 | 0.160903  | -2.390419 | 0.945412  |
| 63 | 1 | 0 | 0.896275  | 1.002037  | 1.752743  |
| 64 | 1 | 0 | 1.130173  | 0.204111  | 1.901090  |

-----  
**TS'<sub>c</sub>**(doublet) E(B3LYP/ SDD-6-31G(d,p))= -1466.71671232 hartree  
 -----

| Center<br>Number | Atomic<br>Number | Atomic<br>Type | Coordinates (Angstroms) |           |           |
|------------------|------------------|----------------|-------------------------|-----------|-----------|
|                  |                  |                | X                       | Y         | Z         |
| 1                | 7                | 0              | 1.183730                | 1.338680  | -1.182680 |
| 2                | 6                | 0              | 2.195712                | 0.803885  | -2.173094 |
| 3                | 1                | 0              | 1.650853                | 0.398844  | -3.030808 |
| 4                | 1                | 0              | 2.798312                | 1.629244  | -2.564365 |
| 5                | 6                | 0              | 1.689617                | 2.671551  | -0.702662 |
| 6                | 1                | 0              | 2.736543                | 2.524031  | -0.420770 |
| 7                | 1                | 0              | 1.670183                | 3.384680  | -1.534863 |
| 8                | 6                | 0              | -0.141943               | 1.485426  | -1.880091 |
| 9                | 1                | 0              | -0.761951               | 2.153508  | -1.277736 |
| 10               | 1                | 0              | -0.012679               | 1.960248  | -2.860677 |
| 11               | 27               | 0              | 0.837048                | -0.099686 | 0.270781  |
| 12               | 6                | 0              | 3.075605                | -0.290587 | -1.621466 |
| 13               | 6                | 0              | 4.352207                | -0.529565 | -2.127397 |
| 14               | 6                | 0              | 3.210909                | -2.129573 | -0.224454 |
| 15               | 6                | 0              | 5.066099                | -1.631892 | -1.656612 |
| 16               | 1                | 0              | 4.776844                | 0.128214  | -2.879062 |
| 17               | 6                | 0              | 4.481229                | -2.452125 | -0.691711 |
| 18               | 1                | 0              | 2.731100                | -2.726076 | 0.544414  |
| 19               | 1                | 0              | 6.061257                | -1.843389 | -2.034324 |
| 20               | 1                | 0              | 4.999960                | -3.319295 | -0.298559 |
| 21               | 6                | 0              | 0.957656                | 3.274107  | 0.479102  |
| 22               | 6                | 0              | 0.377604                | 4.539622  | 0.440089  |
| 23               | 6                | 0              | -0.182331               | 5.069568  | 1.607899  |
| 24               | 1                | 0              | 0.378459                | 5.111362  | -0.482201 |
| 25               | 6                | 0              | 0.435477                | 3.059886  | 2.754119  |
| 26               | 6                | 0              | -0.152834               | 4.321813  | 2.784870  |
| 27               | 1                | 0              | -0.630362               | 6.058124  | 1.596151  |
| 28               | 1                | 0              | 0.495108                | 2.429205  | 3.636213  |

|    |   |   |           |           |           |
|----|---|---|-----------|-----------|-----------|
| 29 | 1 | 0 | -0.569667 | 4.705086  | 3.709465  |
| 30 | 7 | 0 | 2.514868  | -1.072532 | -0.680421 |
| 31 | 7 | 0 | 0.972319  | 2.567866  | 1.628152  |
| 32 | 6 | 0 | -0.807235 | 0.116342  | -2.023436 |
| 33 | 1 | 0 | -1.792145 | 0.212327  | -2.491228 |
| 34 | 1 | 0 | -0.208867 | -0.543384 | -2.656878 |
| 35 | 7 | 0 | -0.898115 | -0.506382 | -0.673828 |
| 36 | 6 | 0 | -0.956518 | -1.994540 | -0.673077 |
| 37 | 1 | 0 | -1.949985 | -2.366365 | -0.943343 |
| 38 | 1 | 0 | -0.244978 | -2.360082 | -1.421648 |
| 39 | 6 | 0 | -2.054318 | 0.082334  | 0.144060  |
| 40 | 1 | 0 | -1.973643 | -0.352337 | 1.142165  |
| 41 | 1 | 0 | -1.854476 | 1.151945  | 0.243499  |
| 42 | 6 | 0 | -3.440202 | -0.142729 | -0.415735 |
| 43 | 6 | 0 | -4.185410 | -1.271991 | -0.039598 |
| 44 | 6 | 0 | -4.025187 | 0.790980  | -1.286220 |
| 45 | 6 | 0 | -5.468019 | -1.479638 | -0.547745 |
| 46 | 1 | 0 | -3.774334 | -1.978713 | 0.677695  |
| 47 | 6 | 0 | -5.307457 | 0.584517  | -1.795687 |
| 48 | 1 | 0 | -3.490501 | 1.701520  | -1.548178 |
| 49 | 6 | 0 | -6.027457 | -0.555449 | -1.432570 |
| 50 | 1 | 0 | -6.035771 | -2.352837 | -0.242439 |
| 51 | 1 | 0 | -5.749085 | 1.317932  | -2.462793 |
| 52 | 1 | 0 | -7.027468 | -0.713800 | -1.823294 |
| 53 | 6 | 0 | -0.536463 | -2.472994 | 0.700078  |
| 54 | 6 | 0 | -0.958027 | -3.674846 | 1.259673  |
| 55 | 6 | 0 | -0.492027 | -4.036545 | 2.525335  |
| 56 | 1 | 0 | -1.640483 | -4.316417 | 0.711908  |
| 57 | 6 | 0 | 0.755682  | -1.988857 | 2.586224  |
| 58 | 6 | 0 | 0.376130  | -3.177740 | 3.200284  |
| 59 | 1 | 0 | -0.808176 | -4.970346 | 2.979167  |
| 60 | 1 | 0 | 1.431705  | -1.291092 | 3.066669  |
| 61 | 1 | 0 | 0.754906  | -3.418038 | 4.187325  |
| 62 | 7 | 0 | 0.314241  | -1.642813 | 1.359431  |
| 63 | 1 | 0 | 1.484837  | 1.315254  | 1.508413  |
| 64 | 1 | 0 | 1.913910  | 0.442668  | 1.363330  |

---

## Fe

1"-H<sub>2</sub>O (quintet) E(B3LYP/ SDD-6-31G(d,p))= -1520.11531775 hartree

---

| Center<br>Number | Atomic<br>Number | Atomic<br>Type | Coordinates (Angstroms) |           |           |
|------------------|------------------|----------------|-------------------------|-----------|-----------|
|                  |                  |                | X                       | Y         | Z         |
| 1                | 7                | 0              | 0.821787                | -0.862477 | 1.531620  |
| 2                | 6                | 0              | 1.909640                | -0.126894 | 2.210195  |
| 3                | 1                | 0              | 1.566099                | 0.896685  | 2.397032  |
| 4                | 1                | 0              | 2.154763                | -0.565740 | 3.187585  |
| 5                | 6                | 0              | 1.126897                | -2.312850 | 1.458639  |
| 6                | 1                | 0              | 2.213929                | -2.431379 | 1.397595  |
| 7                | 1                | 0              | 0.807555                | -2.832544 | 2.371187  |
| 8                | 6                | 0              | -0.522126               | -0.616529 | 2.124343  |
| 9                | 1                | 0              | -1.131214               | -1.503023 | 1.933314  |
| 10               | 1                | 0              | -0.457051               | -0.511333 | 3.215482  |
| 11               | 26               | 0              | 0.791063                | -0.052976 | -0.577492 |
| 12               | 6                | 0              | 3.144799                | -0.093039 | 1.327680  |
| 13               | 6                | 0              | 4.433001                | -0.044969 | 1.858668  |
| 14               | 6                | 0              | 3.987061                | -0.096131 | -0.841040 |
| 15               | 6                | 0              | 5.525671                | -0.013280 | 0.991463  |
| 16               | 1                | 0              | 4.577010                | -0.040053 | 2.934365  |
| 17               | 6                | 0              | 5.299944                | -0.045536 | -0.385806 |
| 18               | 1                | 0              | 3.762026                | -0.125590 | -1.902667 |
| 19               | 1                | 0              | 6.536654                | 0.022959  | 1.384853  |
| 20               | 1                | 0              | 6.121216                | -0.038225 | -1.093715 |
| 21               | 6                | 0              | 0.518181                | -2.970316 | 0.236379  |
| 22               | 6                | 0              | 0.184378                | -4.325164 | 0.238812  |
| 23               | 6                | 0              | -0.294755               | -4.912590 | -0.931067 |
| 24               | 1                | 0              | 0.302464                | -4.910463 | 1.145160  |
| 25               | 6                | 0              | -0.098826               | -2.777984 | -1.991625 |
| 26               | 6                | 0              | -0.438763               | -4.122548 | -2.072732 |
| 27               | 1                | 0              | -0.556667               | -5.965712 | -0.949854 |
| 28               | 1                | 0              | -0.223146               | -2.125935 | -2.850810 |
| 29               | 1                | 0              | -0.813396               | -4.534569 | -3.003051 |
| 30               | 7                | 0              | 2.927559                | -0.110727 | -0.007348 |
| 31               | 7                | 0              | 0.374647                | -2.202891 | -0.867173 |
| 32               | 6                | 0              | -1.198994               | 0.618663  | 1.533709  |
| 33               | 1                | 0              | -2.187621               | 0.746321  | 1.990686  |
| 34               | 1                | 0              | -0.617289               | 1.512202  | 1.775415  |
| 35               | 7                | 0              | -1.316193               | 0.545974  | 0.045639  |
| 36               | 6                | 0              | -1.588665               | 1.899512  | -0.500356 |
| 37               | 1                | 0              | -1.865560               | 1.780742  | -1.554932 |
| 38               | 1                | 0              | -2.448913               | 2.364441  | -0.005389 |
| 39               | 6                | 0              | -2.394731               | -0.421058 | -0.406915 |
| 40               | 1                | 0              | -2.311910               | -0.467583 | -1.497293 |
| 41               | 1                | 0              | -2.117141               | -1.404868 | -0.025351 |

|    |   |   |           |           |           |
|----|---|---|-----------|-----------|-----------|
| 42 | 6 | 0 | -3.816895 | -0.089295 | -0.006578 |
| 43 | 6 | 0 | -4.637472 | 0.679075  | -0.846735 |
| 44 | 6 | 0 | -4.354865 | -0.575824 | 1.195563  |
| 45 | 6 | 0 | -5.951070 | 0.976567  | -0.483209 |
| 46 | 1 | 0 | -4.258877 | 1.027740  | -1.804840 |
| 47 | 6 | 0 | -5.667592 | -0.277763 | 1.562938  |
| 48 | 1 | 0 | -3.755639 | -1.215330 | 1.840266  |
| 49 | 6 | 0 | -6.465956 | 0.503948  | 0.725807  |
| 50 | 1 | 0 | -6.575972 | 1.564018  | -1.148494 |
| 51 | 1 | 0 | -6.070712 | -0.666465 | 2.492768  |
| 52 | 1 | 0 | -7.489868 | 0.729559  | 1.006163  |
| 53 | 6 | 0 | -0.381175 | 2.805251  | -0.416510 |
| 54 | 6 | 0 | -0.519164 | 4.189290  | -0.302848 |
| 55 | 6 | 0 | 0.621603  | 4.990078  | -0.303861 |
| 56 | 1 | 0 | -1.507695 | 4.628802  | -0.216900 |
| 57 | 6 | 0 | 1.928801  | 2.993662  | -0.503160 |
| 58 | 6 | 0 | 1.872360  | 4.379478  | -0.408606 |
| 59 | 1 | 0 | 0.536528  | 6.068829  | -0.219585 |
| 60 | 1 | 0 | 2.881755  | 2.480273  | -0.573459 |
| 61 | 1 | 0 | 2.787280  | 4.961499  | -0.411280 |
| 62 | 7 | 0 | 0.828412  | 2.211984  | -0.509370 |
| 63 | 8 | 0 | 1.058480  | 0.326135  | -2.745045 |
| 64 | 1 | 0 | 1.149307  | -0.263870 | -3.505767 |
| 65 | 1 | 0 | 1.175417  | 1.231326  | -3.065767 |

-----  
**1''-H<sub>2</sub>O** (singlet) E(B3LYP/ SDD-6-31G(d,p))= -1520.09169535 hartree  
 -----

| Center<br>Number | Atomic<br>Number | Atomic<br>Type | Coordinates (Angstroms) |           |           |
|------------------|------------------|----------------|-------------------------|-----------|-----------|
|                  |                  |                | X                       | Y         | Z         |
| 1                | 7                | 0              | 0.857866                | -0.651794 | 1.566203  |
| 2                | 6                | 0              | 1.991748                | 0.135355  | 2.118486  |
| 3                | 1                | 0              | 1.666641                | 1.173844  | 2.233457  |
| 4                | 1                | 0              | 2.299708                | -0.227578 | 3.107779  |
| 5                | 6                | 0              | 1.213149                | -2.108876 | 1.585306  |
| 6                | 1                | 0              | 2.302461                | -2.206335 | 1.577530  |
| 7                | 1                | 0              | 0.865115                | -2.578130 | 2.512098  |
| 8                | 6                | 0              | -0.462509               | -0.439200 | 2.242227  |
| 9                | 1                | 0              | -1.004146               | -1.386379 | 2.191483  |
| 10               | 1                | 0              | -0.327060               | -0.204461 | 3.304688  |
| 11               | 26               | 0              | 0.729839                | -0.027922 | -0.364067 |
| 12               | 6                | 0              | 3.135621                | 0.035873  | 1.125113  |
| 13               | 6                | 0              | 4.474732                | 0.103100  | 1.499876  |
| 14               | 6                | 0              | 3.719582                | -0.277632 | -1.102916 |

|    |   |   |           |           |           |
|----|---|---|-----------|-----------|-----------|
| 15 | 6 | 0 | 5.463152  | -0.014774 | 0.519913  |
| 16 | 1 | 0 | 4.739948  | 0.238023  | 2.543617  |
| 17 | 6 | 0 | 5.078017  | -0.216384 | -0.805062 |
| 18 | 1 | 0 | 3.383471  | -0.439357 | -2.121806 |
| 19 | 1 | 0 | 6.513021  | 0.035814  | 0.790053  |
| 20 | 1 | 0 | 5.810921  | -0.330119 | -1.596026 |
| 21 | 6 | 0 | 0.662699  | -2.804738 | 0.369549  |
| 22 | 6 | 0 | 0.440709  | -4.180162 | 0.329835  |
| 23 | 6 | 0 | -0.001243 | -4.763189 | -0.856484 |
| 24 | 1 | 0 | 0.615664  | -4.782765 | 1.215358  |
| 25 | 6 | 0 | 0.000891  | -2.577434 | -1.838854 |
| 26 | 6 | 0 | -0.224366 | -3.942924 | -1.963206 |
| 27 | 1 | 0 | -0.176469 | -5.832579 | -0.913453 |
| 28 | 1 | 0 | -0.209026 | -1.909934 | -2.667241 |
| 29 | 1 | 0 | -0.579907 | -4.347253 | -2.904329 |
| 30 | 7 | 0 | 2.759747  | -0.143562 | -0.169336 |
| 31 | 7 | 0 | 0.447598  | -2.006035 | -0.700322 |
| 32 | 6 | 0 | -1.263865 | 0.651227  | 1.547865  |
| 33 | 1 | 0 | -2.281983 | 0.685552  | 1.950354  |
| 34 | 1 | 0 | -0.812252 | 1.625376  | 1.742795  |
| 35 | 7 | 0 | -1.289462 | 0.435382  | 0.061319  |
| 36 | 6 | 0 | -1.558535 | 1.735788  | -0.603450 |
| 37 | 1 | 0 | -1.720053 | 1.536994  | -1.668755 |
| 38 | 1 | 0 | -2.475106 | 2.201021  | -0.223968 |
| 39 | 6 | 0 | -2.340339 | -0.581638 | -0.347502 |
| 40 | 1 | 0 | -2.202949 | -0.726583 | -1.422078 |
| 41 | 1 | 0 | -2.073059 | -1.519999 | 0.141654  |
| 42 | 6 | 0 | -3.781922 | -0.232833 | -0.045336 |
| 43 | 6 | 0 | -4.561403 | 0.470503  | -0.977109 |
| 44 | 6 | 0 | -4.381018 | -0.646425 | 1.155258  |
| 45 | 6 | 0 | -5.894208 | 0.778492  | -0.703410 |
| 46 | 1 | 0 | -4.134587 | 0.758366  | -1.935142 |
| 47 | 6 | 0 | -5.713525 | -0.338253 | 1.432379  |
| 48 | 1 | 0 | -3.812999 | -1.239024 | 1.869588  |
| 49 | 6 | 0 | -6.470244 | 0.380325  | 0.505002  |
| 50 | 1 | 0 | -6.486576 | 1.315195  | -1.437761 |
| 51 | 1 | 0 | -6.163762 | -0.670771 | 2.362336  |
| 52 | 1 | 0 | -7.509089 | 0.613906  | 0.715076  |
| 53 | 6 | 0 | -0.381500 | 2.662958  | -0.438231 |
| 54 | 6 | 0 | -0.523017 | 4.048168  | -0.517482 |
| 55 | 6 | 0 | 0.604825  | 4.858503  | -0.406091 |
| 56 | 1 | 0 | -1.507695 | 4.479975  | -0.664269 |
| 57 | 6 | 0 | 1.908851  | 2.865763  | -0.131982 |
| 58 | 6 | 0 | 1.845989  | 4.251803  | -0.210687 |

|    |   |   |          |           |           |
|----|---|---|----------|-----------|-----------|
| 59 | 1 | 0 | 0.516884 | 5.938541  | -0.466263 |
| 60 | 1 | 0 | 2.858762 | 2.369356  | 0.020877  |
| 61 | 1 | 0 | 2.753450 | 4.837772  | -0.116214 |
| 62 | 7 | 0 | 0.821711 | 2.068255  | -0.239254 |
| 63 | 8 | 0 | 0.635992 | 0.397001  | -2.436037 |
| 64 | 1 | 0 | 1.091422 | -0.190205 | -3.055445 |
| 65 | 1 | 0 | 0.919647 | 1.295599  | -2.660290 |

-----  
**1''-H<sub>2</sub>O** (triplet) E(B3LYP/ SDD-6-31G(d,p))= -1520.08822652 hartree  
 -----

| Center<br>Number | Atomic<br>Number | Atomic<br>Type | Coordinates (Angstroms) |           |           |
|------------------|------------------|----------------|-------------------------|-----------|-----------|
|                  |                  |                | X                       | Y         | Z         |
| 1                | 7                | 0              | 0.808900                | -0.782315 | 1.658516  |
| 2                | 6                | 0              | 1.908796                | 0.001111  | 2.246378  |
| 3                | 1                | 0              | 1.562909                | 1.031844  | 2.384599  |
| 4                | 1                | 0              | 2.211988                | -0.371728 | 3.235391  |
| 5                | 6                | 0              | 1.145413                | -2.217903 | 1.567232  |
| 6                | 1                | 0              | 2.233895                | -2.330193 | 1.603553  |
| 7                | 1                | 0              | 0.752587                | -2.783296 | 2.421991  |
| 8                | 6                | 0              | -0.528763               | -0.549443 | 2.251262  |
| 9                | 1                | 0              | -1.106110               | -1.469750 | 2.134017  |
| 10               | 1                | 0              | -0.466543               | -0.356103 | 3.330746  |
| 11               | 26               | 0              | 0.723776                | 0.030401  | -0.487134 |
| 12               | 6                | 0              | 3.094383                | -0.022049 | 1.296180  |
| 13               | 6                | 0              | 4.411881                | -0.001174 | 1.751054  |
| 14               | 6                | 0              | 3.812729                | -0.138022 | -0.913627 |
| 15               | 6                | 0              | 5.456036                | -0.044689 | 0.826227  |
| 16               | 1                | 0              | 4.614424                | 0.039071  | 2.816547  |
| 17               | 6                | 0              | 5.150744                | -0.123193 | -0.532855 |
| 18               | 1                | 0              | 3.528384                | -0.190817 | -1.959336 |
| 19               | 1                | 0              | 6.487983                | -0.031106 | 1.162187  |
| 20               | 1                | 0              | 5.929259                | -0.175800 | -1.285767 |
| 21               | 6                | 0              | 0.658173                | -2.821481 | 0.268941  |
| 22               | 6                | 0              | 0.446559                | -4.194987 | 0.145372  |
| 23               | 6                | 0              | 0.055924                | -4.724383 | -1.082272 |
| 24               | 1                | 0              | 0.589489                | -4.838742 | 1.007445  |
| 25               | 6                | 0              | 0.086186                | -2.497474 | -1.956904 |
| 26               | 6                | 0              | -0.129905               | -3.854222 | -2.157245 |
| 27               | 1                | 0              | -0.109499               | -5.790938 | -1.195606 |
| 28               | 1                | 0              | -0.083539               | -1.789198 | -2.759675 |
| 29               | 1                | 0              | -0.446089               | -4.213653 | -3.130050 |
| 30               | 7                | 0              | 2.801126                | -0.080333 | -0.025401 |
| 31               | 7                | 0              | 0.481917                | -1.976941 | -0.774243 |



|    |   |   |           |           |           |
|----|---|---|-----------|-----------|-----------|
| 32 | 6 | 0 | -1.257734 | 0.608875  | 1.573408  |
| 33 | 1 | 0 | -2.270027 | 0.700469  | 1.983112  |
| 34 | 1 | 0 | -0.739796 | 1.546633  | 1.788233  |
| 35 | 7 | 0 | -1.319254 | 0.454041  | 0.082534  |
| 36 | 6 | 0 | -1.619807 | 1.774321  | -0.531198 |
| 37 | 1 | 0 | -1.847978 | 1.605782  | -1.590309 |
| 38 | 1 | 0 | -2.510135 | 2.233412  | -0.087332 |
| 39 | 6 | 0 | -2.358524 | -0.568366 | -0.345848 |
| 40 | 1 | 0 | -2.239507 | -0.675662 | -1.427856 |
| 41 | 1 | 0 | -2.066786 | -1.518028 | 0.104975  |
| 42 | 6 | 0 | -3.799573 | -0.249393 | -0.010199 |
| 43 | 6 | 0 | -4.606724 | 0.454208  | -0.917722 |
| 44 | 6 | 0 | -4.369407 | -0.689213 | 1.195268  |
| 45 | 6 | 0 | -5.939304 | 0.736159  | -0.616472 |
| 46 | 1 | 0 | -4.202009 | 0.762510  | -1.879096 |
| 47 | 6 | 0 | -5.701591 | -0.407041 | 1.499792  |
| 48 | 1 | 0 | -3.779030 | -1.280784 | 1.891750  |
| 49 | 6 | 0 | -6.486749 | 0.311414  | 0.596075  |
| 50 | 1 | 0 | -6.553375 | 1.273064  | -1.332592 |
| 51 | 1 | 0 | -6.129548 | -0.759559 | 2.432887  |
| 52 | 1 | 0 | -7.525421 | 0.524314  | 0.827847  |
| 53 | 6 | 0 | -0.429929 | 2.691359  | -0.421322 |
| 54 | 6 | 0 | -0.567046 | 4.078449  | -0.399796 |
| 55 | 6 | 0 | 0.573296  | 4.878161  | -0.353920 |
| 56 | 1 | 0 | -1.557834 | 4.520324  | -0.419455 |
| 57 | 6 | 0 | 1.884758  | 2.870972  | -0.333650 |
| 58 | 6 | 0 | 1.823317  | 4.259036  | -0.322559 |
| 59 | 1 | 0 | 0.488102  | 5.959986  | -0.338186 |
| 60 | 1 | 0 | 2.838292  | 2.360231  | -0.304467 |
| 61 | 1 | 0 | 2.739982  | 4.836967  | -0.284433 |
| 62 | 7 | 0 | 0.783872  | 2.086095  | -0.382359 |
| 63 | 8 | 0 | 0.930741  | 0.474161  | -2.727219 |
| 64 | 1 | 0 | 1.150165  | -0.067380 | -3.498147 |
| 65 | 1 | 0 | 1.066899  | 1.394397  | -2.992666 |

-----  
**2''<sub>dp</sub>-H<sub>2</sub>O** (doublet) E(B3LYP/SDD-6-31G(d,p))= -1520.32205281 hartree  
 -----

| Center<br>Number | Atomic<br>Number | Atomic<br>Type | Coordinates (Angstroms) |           |           |
|------------------|------------------|----------------|-------------------------|-----------|-----------|
|                  |                  |                | X                       | Y         | Z         |
| 1                | 7                | 0              | -0.798426               | -0.822967 | -1.752349 |
| 2                | 6                | 0              | -1.944689               | -0.071708 | -2.284659 |
| 3                | 1                | 0              | -1.625609               | 0.965401  | -2.438504 |
| 4                | 1                | 0              | -2.296415               | -0.454772 | -3.256819 |

|    |    |   |           |           |           |
|----|----|---|-----------|-----------|-----------|
| 5  | 6  | 0 | -1.071380 | -2.261444 | -1.596681 |
| 6  | 1  | 0 | -2.150339 | -2.424373 | -1.694978 |
| 7  | 1  | 0 | -0.603080 | -2.854407 | -2.394235 |
| 8  | 6  | 0 | 0.528502  | -0.528735 | -2.329080 |
| 9  | 1  | 0 | 1.125670  | -1.441748 | -2.253380 |
| 10 | 1  | 0 | 0.464543  | -0.289901 | -3.401126 |
| 11 | 26 | 0 | -0.764999 | 0.098760  | 0.309707  |
| 12 | 6  | 0 | -3.085291 | -0.107998 | -1.278806 |
| 13 | 6  | 0 | -4.418848 | -0.179756 | -1.670332 |
| 14 | 6  | 0 | -3.699300 | -0.141083 | 0.965882  |
| 15 | 6  | 0 | -5.423074 | -0.216978 | -0.699839 |
| 16 | 1  | 0 | -4.665973 | -0.209732 | -2.726926 |
| 17 | 6  | 0 | -5.051611 | -0.205750 | 0.643784  |
| 18 | 1  | 0 | -3.363210 | -0.132118 | 1.997768  |
| 19 | 1  | 0 | -6.467777 | -0.265980 | -0.988798 |
| 20 | 1  | 0 | -5.791848 | -0.248974 | 1.435305  |
| 21 | 6  | 0 | -0.647771 | -2.788683 | -0.235397 |
| 22 | 6  | 0 | -0.435042 | -4.150354 | -0.019941 |
| 23 | 6  | 0 | -0.133651 | -4.600921 | 1.264050  |
| 24 | 1  | 0 | -0.510282 | -4.845716 | -0.850634 |
| 25 | 6  | 0 | -0.259525 | -2.323772 | 2.006910  |
| 26 | 6  | 0 | -0.051685 | -3.667453 | 2.298075  |
| 27 | 1  | 0 | 0.034091  | -5.656531 | 1.452523  |
| 28 | 1  | 0 | -0.196579 | -1.552859 | 2.769169  |
| 29 | 1  | 0 | 0.177592  | -3.969056 | 3.314284  |
| 30 | 7  | 0 | -2.723625 | -0.077907 | 0.034283  |
| 31 | 7  | 0 | -0.547897 | -1.883109 | 0.762653  |
| 32 | 6  | 0 | 1.250643  | 0.617277  | -1.611835 |
| 33 | 1  | 0 | 2.265665  | 0.715556  | -2.019382 |
| 34 | 1  | 0 | 0.735567  | 1.559399  | -1.813824 |
| 35 | 7  | 0 | 1.288528  | 0.447073  | -0.126041 |
| 36 | 6  | 0 | 1.588837  | 1.753932  | 0.517361  |
| 37 | 1  | 0 | 1.742771  | 1.550006  | 1.583990  |
| 38 | 1  | 0 | 2.510966  | 2.204915  | 0.129678  |
| 39 | 6  | 0 | 2.281827  | -0.594272 | 0.314378  |
| 40 | 1  | 0 | 2.143814  | -0.697233 | 1.393688  |
| 41 | 1  | 0 | 1.973965  | -1.540118 | -0.135438 |
| 42 | 6  | 0 | 3.741714  | -0.325298 | 0.000999  |
| 43 | 6  | 0 | 4.554270  | 0.366994  | 0.911554  |
| 44 | 6  | 0 | 4.321747  | -0.791108 | -1.188703 |
| 45 | 6  | 0 | 5.899104  | 0.609754  | 0.630555  |
| 46 | 1  | 0 | 4.136187  | 0.703960  | 1.856890  |
| 47 | 6  | 0 | 5.666314  | -0.549809 | -1.474518 |
| 48 | 1  | 0 | 3.722959  | -1.366641 | -1.891174 |

|    |   |   |           |           |           |
|----|---|---|-----------|-----------|-----------|
| 49 | 6 | 0 | 6.456862  | 0.156441  | -0.566480 |
| 50 | 1 | 0 | 6.513371  | 1.142602  | 1.350161  |
| 51 | 1 | 0 | 6.098069  | -0.921943 | -2.398744 |
| 52 | 1 | 0 | 7.504473  | 0.340535  | -0.783909 |
| 53 | 6 | 0 | 0.422261  | 2.686984  | 0.353566  |
| 54 | 6 | 0 | 0.570064  | 4.066101  | 0.314693  |
| 55 | 6 | 0 | -0.557142 | 4.889861  | 0.246707  |
| 56 | 1 | 0 | 1.568921  | 4.490632  | 0.346708  |
| 57 | 6 | 0 | -1.894215 | 2.887552  | 0.228707  |
| 58 | 6 | 0 | -1.810452 | 4.269729  | 0.208185  |
| 59 | 1 | 0 | -0.460883 | 5.969513  | 0.222954  |
| 60 | 1 | 0 | -2.856682 | 2.394223  | 0.187560  |
| 61 | 1 | 0 | -2.724218 | 4.852529  | 0.154294  |
| 62 | 7 | 0 | -0.802466 | 2.062787  | 0.296768  |
| 63 | 8 | 0 | -0.410623 | 0.762361  | 3.241996  |
| 64 | 1 | 0 | -0.789330 | 1.052181  | 4.082298  |
| 65 | 1 | 0 | -0.745027 | 1.385844  | 2.580243  |

-----  
**2''<sub>dp</sub>-H<sub>2</sub>O (quartet) E(B3LYP/ SDD-6-31G(d,p))= -1520.35117895 hartree**  
 -----

| Center<br>Number | Atomic<br>Number | Atomic<br>Type | Coordinates (Angstroms) |           |           |
|------------------|------------------|----------------|-------------------------|-----------|-----------|
|                  |                  |                | X                       | Y         | Z         |
| 1                | 7                | 0              | -0.797748               | -0.892530 | -1.537669 |
| 2                | 6                | 0              | -1.885270               | -0.167657 | -2.223092 |
| 3                | 1                | 0              | -1.545583               | 0.864850  | -2.369005 |
| 4                | 1                | 0              | -2.097970               | -0.582852 | -3.221254 |
| 5                | 6                | 0              | -1.083801               | -2.333346 | -1.403354 |
| 6                | 1                | 0              | -2.166618               | -2.449476 | -1.290511 |
| 7                | 1                | 0              | -0.794515               | -2.898404 | -2.302052 |
| 8                | 6                | 0              | 0.535248                | -0.635373 | -2.118065 |
| 9                | 1                | 0              | 1.161199                | -1.506885 | -1.908376 |
| 10               | 1                | 0              | 0.485235                | -0.548050 | -3.214394 |
| 11               | 26               | 0              | -0.926342               | -0.054721 | 0.612744  |
| 12               | 6                | 0              | -3.141706               | -0.173934 | -1.378817 |
| 13               | 6                | 0              | -4.407565               | -0.252357 | -1.943415 |
| 14               | 6                | 0              | -4.052806               | -0.125419 | 0.759640  |
| 15               | 6                | 0              | -5.541156               | -0.255581 | -1.121202 |
| 16               | 1                | 0              | -4.506365               | -0.315728 | -3.023105 |
| 17               | 6                | 0              | -5.345485               | -0.196810 | 0.262773  |
| 18               | 1                | 0              | -3.873680               | -0.078956 | 1.830455  |
| 19               | 1                | 0              | -6.537223               | -0.312001 | -1.545947 |
| 20               | 1                | 0              | -6.184421               | -0.207237 | 0.950866  |
| 21               | 6                | 0              | -0.423683               | -2.924564 | -0.174133 |

|    |   |   |           |           |           |
|----|---|---|-----------|-----------|-----------|
| 22 | 6 | 0 | 0.062281  | -4.228055 | -0.161739 |
| 23 | 6 | 0 | 0.595484  | -4.755416 | 1.019343  |
| 24 | 1 | 0 | 0.018212  | -4.825891 | -1.066902 |
| 25 | 6 | 0 | 0.132132  | -2.645364 | 2.057932  |
| 26 | 6 | 0 | 0.627087  | -3.942837 | 2.150979  |
| 27 | 1 | 0 | 0.975934  | -5.771088 | 1.049398  |
| 28 | 1 | 0 | 0.157130  | -1.979178 | 2.914947  |
| 29 | 1 | 0 | 1.031454  | -4.299776 | 3.092215  |
| 30 | 7 | 0 | -2.943028 | -0.108676 | -0.027735 |
| 31 | 7 | 0 | -0.387776 | -2.126480 | 0.923336  |
| 32 | 6 | 0 | 1.192850  | 0.623378  | -1.547729 |
| 33 | 1 | 0 | 2.161458  | 0.779594  | -2.044586 |
| 34 | 1 | 0 | 0.574101  | 1.494282  | -1.781854 |
| 35 | 7 | 0 | 1.339700  | 0.570085  | -0.075361 |
| 36 | 6 | 0 | 1.561372  | 1.916280  | 0.478790  |
| 37 | 1 | 0 | 1.823343  | 1.791995  | 1.537787  |
| 38 | 1 | 0 | 2.410468  | 2.430490  | 0.006388  |
| 39 | 6 | 0 | 2.402996  | -0.378476 | 0.383063  |
| 40 | 1 | 0 | 2.326311  | -0.417164 | 1.474301  |
| 41 | 1 | 0 | 2.131213  | -1.371042 | 0.019247  |
| 42 | 6 | 0 | 3.831363  | -0.056362 | -0.021004 |
| 43 | 6 | 0 | 4.650595  | 0.733451  | 0.799341  |
| 44 | 6 | 0 | 4.371557  | -0.557384 | -1.215213 |
| 45 | 6 | 0 | 5.961676  | 1.033697  | 0.428134  |
| 46 | 1 | 0 | 4.267014  | 1.101747  | 1.747880  |
| 47 | 6 | 0 | 5.681749  | -0.258325 | -1.591872 |
| 48 | 1 | 0 | 3.770168  | -1.205137 | -1.848962 |
| 49 | 6 | 0 | 6.478605  | 0.542613  | -0.772254 |
| 50 | 1 | 0 | 6.582263  | 1.640917  | 1.080362  |
| 51 | 1 | 0 | 6.082846  | -0.659086 | -2.518003 |
| 52 | 1 | 0 | 7.500068  | 0.771395  | -1.060288 |
| 53 | 6 | 0 | 0.328917  | 2.789903  | 0.399570  |
| 54 | 6 | 0 | 0.437523  | 4.170255  | 0.229162  |
| 55 | 6 | 0 | -0.712010 | 4.959203  | 0.256668  |
| 56 | 1 | 0 | 1.416085  | 4.617125  | 0.083192  |
| 57 | 6 | 0 | -1.973147 | 2.947065  | 0.579598  |
| 58 | 6 | 0 | -1.944002 | 4.330423  | 0.442558  |
| 59 | 1 | 0 | -0.647704 | 6.035261  | 0.131273  |
| 60 | 1 | 0 | -2.914527 | 2.418851  | 0.691984  |
| 61 | 1 | 0 | -2.869552 | 4.895574  | 0.468878  |
| 62 | 7 | 0 | -0.864812 | 2.173883  | 0.560676  |
| 63 | 8 | 0 | -1.038444 | 0.333519  | 2.903312  |
| 64 | 1 | 0 | -1.588832 | -0.189330 | 3.501491  |
| 65 | 1 | 0 | -1.224220 | 1.261789  | 3.100034  |

-----  
1'' (quintet) E(B3LYP/ SDD-6-31G(d,p))= -1443.67201787 hartree  
-----

| Center<br>Number | Atomic<br>Number | Atomic<br>Type | Coordinates (Angstroms) |           |           |
|------------------|------------------|----------------|-------------------------|-----------|-----------|
|                  |                  |                | X                       | Y         | Z         |
| 1                | 7                | 0              | -1.268385               | -1.494617 | -1.209822 |
| 2                | 6                | 0              | -2.194724               | -1.007067 | -2.257202 |
| 3                | 1                | 0              | -1.605587               | -0.509988 | -3.035232 |
| 4                | 1                | 0              | -2.720102               | -1.835292 | -2.750203 |
| 5                | 6                | 0              | -1.893150               | -2.573412 | -0.403966 |
| 6                | 1                | 0              | -2.975209               | -2.396721 | -0.390822 |
| 7                | 1                | 0              | -1.742407               | -3.557247 | -0.866408 |
| 8                | 6                | 0              | 0.061712                | -1.884816 | -1.755507 |
| 9                | 1                | 0              | 0.533487                | -2.548326 | -1.026267 |
| 10               | 1                | 0              | -0.044445               | -2.459553 | -2.685336 |
| 11               | 26               | 0              | -0.880358               | 0.223247  | 0.192317  |
| 12               | 6                | 0              | -3.189119               | -0.004252 | -1.702685 |
| 13               | 6                | 0              | -4.443251               | 0.178935  | -2.281636 |
| 14               | 6                | 0              | -3.597735               | 1.705908  | -0.174308 |
| 15               | 6                | 0              | -5.287365               | 1.170525  | -1.781462 |
| 16               | 1                | 0              | -4.751878               | -0.443862 | -3.115078 |
| 17               | 6                | 0              | -4.855740               | 1.952171  | -0.708380 |
| 18               | 1                | 0              | -3.222990               | 2.287352  | 0.662113  |
| 19               | 1                | 0              | -6.267334               | 1.328293  | -2.220643 |
| 20               | 1                | 0              | -5.480544               | 2.732621  | -0.289067 |
| 21               | 6                | 0              | -1.410847               | -2.582969 | 1.033722  |
| 22               | 6                | 0              | -1.405363               | -3.752361 | 1.791751  |
| 23               | 6                | 0              | -1.048208               | -3.690994 | 3.138970  |
| 24               | 1                | 0              | -1.682227               | -4.696455 | 1.333743  |
| 25               | 6                | 0              | -0.714326               | -1.336231 | 2.874501  |
| 26               | 6                | 0              | -0.698752               | -2.458376 | 3.693099  |
| 27               | 1                | 0              | -1.041013               | -4.591265 | 3.745249  |
| 28               | 1                | 0              | -0.438839               | -0.359604 | 3.260301  |
| 29               | 1                | 0              | -0.415469               | -2.366056 | 4.735501  |
| 30               | 7                | 0              | -2.775325               | 0.748516  | -0.655906 |
| 31               | 7                | 0              | -1.060649               | -1.389905 | 1.570063  |
| 32               | 6                | 0              | 0.943866                | -0.658135 | -2.005525 |
| 33               | 1                | 0              | 1.914477                | -0.973018 | -2.403950 |
| 34               | 1                | 0              | 0.486883                | -0.015388 | -2.763595 |
| 35               | 7                | 0              | 1.106515                | 0.148694  | -0.762777 |
| 36               | 6                | 0              | 1.432977                | 1.571166  | -1.045061 |
| 37               | 1                | 0              | 2.488023                | 1.698376  | -1.309646 |
| 38               | 1                | 0              | 0.844367                | 1.890478  | -1.913524 |

|    |   |   |           |           |           |
|----|---|---|-----------|-----------|-----------|
| 39 | 6 | 0 | 2.117461  | -0.464791 | 0.199948  |
| 40 | 1 | 0 | 2.062764  | 0.130341  | 1.115779  |
| 41 | 1 | 0 | 1.746927  | -1.462676 | 0.445312  |
| 42 | 6 | 0 | 3.546240  | -0.540640 | -0.288388 |
| 43 | 6 | 0 | 4.446655  | 0.504538  | -0.025872 |
| 44 | 6 | 0 | 4.010586  | -1.671287 | -0.979565 |
| 45 | 6 | 0 | 5.767129  | 0.436146  | -0.471192 |
| 46 | 1 | 0 | 4.122828  | 1.364579  | 0.556313  |
| 47 | 6 | 0 | 5.330501  | -1.741021 | -1.426442 |
| 48 | 1 | 0 | 3.348433  | -2.518309 | -1.145388 |
| 49 | 6 | 0 | 6.208413  | -0.683800 | -1.178912 |
| 50 | 1 | 0 | 6.454403  | 1.247633  | -0.253706 |
| 51 | 1 | 0 | 5.677036  | -2.624255 | -1.953519 |
| 52 | 1 | 0 | 7.237066  | -0.740438 | -1.520180 |
| 53 | 6 | 0 | 1.071208  | 2.451961  | 0.137083  |
| 54 | 6 | 0 | 1.750478  | 3.638041  | 0.410814  |
| 55 | 6 | 0 | 1.336158  | 4.430167  | 1.481388  |
| 56 | 1 | 0 | 2.590811  | 3.934746  | -0.208332 |
| 57 | 6 | 0 | -0.368094 | 2.812382  | 1.934661  |
| 58 | 6 | 0 | 0.256908  | 4.008938  | 2.260956  |
| 59 | 1 | 0 | 1.851818  | 5.357774  | 1.708786  |
| 60 | 1 | 0 | -1.205406 | 2.442914  | 2.520243  |
| 61 | 1 | 0 | -0.091058 | 4.590325  | 3.107356  |
| 62 | 7 | 0 | 0.022525  | 2.047917  | 0.892046  |

-----  
**1''** (singlet) E(B3LYP/ SDD-6-31G(d,p))= -1443.63378047 hartree

| Center<br>Number | Atomic<br>Number | Atomic<br>Type | Coordinates (Angstroms) |           |           |
|------------------|------------------|----------------|-------------------------|-----------|-----------|
|                  |                  |                | X                       | Y         | Z         |
| 1                | 7                | 0              | -1.130858               | -1.706883 | -0.954434 |
| 2                | 6                | 0              | -2.138756               | -1.530831 | -2.035014 |
| 3                | 1                | 0              | -1.634846               | -1.097593 | -2.907169 |
| 4                | 1                | 0              | -2.560347               | -2.491115 | -2.357792 |
| 5                | 6                | 0              | -1.673202               | -2.567997 | 0.140181  |
| 6                | 1                | 0              | -2.764404               | -2.480348 | 0.135426  |
| 7                | 1                | 0              | -1.436764               | -3.623775 | -0.034072 |
| 8                | 6                | 0              | 0.195185                | -2.208491 | -1.448133 |
| 9                | 1                | 0              | 0.665995                | -2.749817 | -0.624420 |
| 10               | 1                | 0              | 0.064992                | -2.921553 | -2.270868 |
| 11               | 26               | 0              | -0.833367               | 0.140051  | -0.206102 |
| 12               | 6                | 0              | -3.224356               | -0.592697 | -1.542306 |
| 13               | 6                | 0              | -4.516806               | -0.616720 | -2.057175 |

|    |   |   |           |           |           |
|----|---|---|-----------|-----------|-----------|
| 14 | 6 | 0 | -3.769406 | 1.150699  | -0.104975 |
| 15 | 6 | 0 | -5.458412 | 0.291953  | -1.572038 |
| 16 | 1 | 0 | -4.782354 | -1.337219 | -2.824035 |
| 17 | 6 | 0 | -5.077137 | 1.188970  | -0.574522 |
| 18 | 1 | 0 | -3.441332 | 1.830691  | 0.670922  |
| 19 | 1 | 0 | -6.471859 | 0.292387  | -1.960248 |
| 20 | 1 | 0 | -5.777496 | 1.906271  | -0.161659 |
| 21 | 6 | 0 | -1.161286 | -2.092049 | 1.477206  |
| 22 | 6 | 0 | -1.128544 | -2.908376 | 2.604957  |
| 23 | 6 | 0 | -0.723452 | -2.367844 | 3.825017  |
| 24 | 1 | 0 | -1.422048 | -3.950266 | 2.526915  |
| 25 | 6 | 0 | -0.395293 | -0.271402 | 2.707232  |
| 26 | 6 | 0 | -0.354872 | -1.023090 | 3.875338  |
| 27 | 1 | 0 | -0.693946 | -2.984745 | 4.717263  |
| 28 | 1 | 0 | -0.100374 | 0.770697  | 2.701206  |
| 29 | 1 | 0 | -0.033033 | -0.559683 | 4.801220  |
| 30 | 7 | 0 | -2.847248 | 0.284985  | -0.573657 |
| 31 | 7 | 0 | -0.791488 | -0.788670 | 1.525156  |
| 32 | 6 | 0 | 1.071106  | -1.035441 | -1.878665 |
| 33 | 1 | 0 | 2.069041  | -1.380403 | -2.168176 |
| 34 | 1 | 0 | 0.639494  | -0.547691 | -2.758733 |
| 35 | 7 | 0 | 1.138149  | -0.022837 | -0.774511 |
| 36 | 6 | 0 | 1.424011  | 1.348267  | -1.301075 |
| 37 | 1 | 0 | 2.493656  | 1.497893  | -1.475987 |
| 38 | 1 | 0 | 0.929488  | 1.452802  | -2.274933 |
| 39 | 6 | 0 | 2.143819  | -0.407315 | 0.305957  |
| 40 | 1 | 0 | 2.024954  | 0.336859  | 1.096737  |
| 41 | 1 | 0 | 1.807770  | -1.362855 | 0.712493  |
| 42 | 6 | 0 | 3.590648  | -0.493617 | -0.120446 |
| 43 | 6 | 0 | 4.437641  | 0.620340  | 0.000077  |
| 44 | 6 | 0 | 4.129465  | -1.698743 | -0.599919 |
| 45 | 6 | 0 | 5.777502  | 0.542220  | -0.381098 |
| 46 | 1 | 0 | 4.056683  | 1.546646  | 0.424983  |
| 47 | 6 | 0 | 5.468636  | -1.778514 | -0.983049 |
| 48 | 1 | 0 | 3.510737  | -2.592465 | -0.645548 |
| 49 | 6 | 0 | 6.292451  | -0.655606 | -0.880989 |
| 50 | 1 | 0 | 6.422082  | 1.408899  | -0.274004 |
| 51 | 1 | 0 | 5.872419  | -2.718633 | -1.345147 |
| 52 | 1 | 0 | 7.336103  | -0.719226 | -1.171693 |
| 53 | 6 | 0 | 0.863810  | 2.385248  | -0.354122 |
| 54 | 6 | 0 | 1.439562  | 3.641591  | -0.183122 |
| 55 | 6 | 0 | 0.831892  | 4.558490  | 0.674908  |
| 56 | 1 | 0 | 2.350347  | 3.895505  | -0.715382 |
| 57 | 6 | 0 | -0.846921 | 2.910834  | 1.130844  |

|    |   |   |           |          |          |
|----|---|---|-----------|----------|----------|
| 58 | 6 | 0 | -0.330715 | 4.182654 | 1.348843 |
| 59 | 1 | 0 | 1.262720  | 5.543737 | 0.821451 |
| 60 | 1 | 0 | -1.738032 | 2.578114 | 1.651538 |
| 61 | 1 | 0 | -0.830384 | 4.858100 | 2.034194 |
| 62 | 7 | 0 | -0.275860 | 2.022297 | 0.290401 |

-----  
**1''** (triplet) E(B3LYP/ SDD-6-31G(d,p))= -1443.65534806 hartree  
 -----

| Center<br>Number | Atomic<br>Number | Atomic<br>Type | Coordinates (Angstroms) |           |           |
|------------------|------------------|----------------|-------------------------|-----------|-----------|
|                  |                  |                | X                       | Y         | Z         |
| 1                | 7                | 0              | -1.165692               | -1.500134 | -1.172998 |
| 2                | 6                | 0              | -2.110764               | -1.093663 | -2.256805 |
| 3                | 1                | 0              | -1.534533               | -0.604491 | -3.048954 |
| 4                | 1                | 0              | -2.589814               | -1.969521 | -2.710240 |
| 5                | 6                | 0              | -1.773905               | -2.592693 | -0.352650 |
| 6                | 1                | 0              | -2.857174               | -2.427864 | -0.334096 |
| 7                | 1                | 0              | -1.606947               | -3.569939 | -0.821026 |
| 8                | 6                | 0              | 0.166889                | -1.903844 | -1.737592 |
| 9                | 1                | 0              | 0.655949                | -2.538578 | -0.995015 |
| 10               | 1                | 0              | 0.037915                | -2.506868 | -2.644853 |
| 11               | 26               | 0              | -0.822721               | 0.132507  | 0.014048  |
| 12               | 6                | 0              | -3.127943               | -0.115060 | -1.722414 |
| 13               | 6                | 0              | -4.400233               | 0.027359  | -2.267440 |
| 14               | 6                | 0              | -3.512216               | 1.622250  | -0.223660 |
| 15               | 6                | 0              | -5.246789               | 1.015293  | -1.761329 |
| 16               | 1                | 0              | -4.722014               | -0.619947 | -3.076693 |
| 17               | 6                | 0              | -4.793121               | 1.828845  | -0.722948 |
| 18               | 1                | 0              | -3.121740               | 2.233266  | 0.581889  |
| 19               | 1                | 0              | -6.243176               | 1.145879  | -2.171271 |
| 20               | 1                | 0              | -5.417482               | 2.609121  | -0.302568 |
| 21               | 6                | 0              | -1.267589               | -2.564604 | 1.070573  |
| 22               | 6                | 0              | -1.243755               | -3.700177 | 1.876754  |
| 23               | 6                | 0              | -0.853416               | -3.573675 | 3.210852  |
| 24               | 1                | 0              | -1.531747               | -4.664664 | 1.471132  |
| 25               | 6                | 0              | -0.523798               | -1.233172 | 2.824031  |
| 26               | 6                | 0              | -0.489545               | -2.316492 | 3.695033  |
| 27               | 1                | 0              | -0.831241               | -4.443381 | 3.859780  |
| 28               | 1                | 0              | -0.233812               | -0.240767 | 3.154008  |
| 29               | 1                | 0              | -0.179208               | -2.175705 | 4.724299  |
| 30               | 7                | 0              | -2.689794               | 0.667868  | -0.705712 |
| 31               | 7                | 0              | -0.906509               | -1.346714 | 1.536327  |
| 32               | 6                | 0              | 1.016620                | -0.665368 | -2.022320 |
| 33               | 1                | 0              | 2.009483                | -0.954970 | -2.381824 |



|    |   |   |           |           |           |
|----|---|---|-----------|-----------|-----------|
| 34 | 1 | 0 | 0.558462  | -0.056117 | -2.806529 |
| 35 | 7 | 0 | 1.098004  | 0.162370  | -0.782470 |
| 36 | 6 | 0 | 1.305337  | 1.618486  | -1.034306 |
| 37 | 1 | 0 | 2.352463  | 1.848980  | -1.255832 |
| 38 | 1 | 0 | 0.717648  | 1.899243  | -1.916432 |
| 39 | 6 | 0 | 2.137051  | -0.372639 | 0.203009  |
| 40 | 1 | 0 | 2.031521  | 0.230348  | 1.108027  |
| 41 | 1 | 0 | 1.827789  | -1.387951 | 0.458450  |
| 42 | 6 | 0 | 3.569952  | -0.360671 | -0.275563 |
| 43 | 6 | 0 | 4.396700  | 0.748039  | -0.031585 |
| 44 | 6 | 0 | 4.114906  | -1.474869 | -0.934163 |
| 45 | 6 | 0 | 5.722774  | 0.756728  | -0.465103 |
| 46 | 1 | 0 | 4.013016  | 1.597101  | 0.529892  |
| 47 | 6 | 0 | 5.440648  | -1.467751 | -1.368694 |
| 48 | 1 | 0 | 3.512072  | -2.368306 | -1.082642 |
| 49 | 6 | 0 | 6.243946  | -0.348446 | -1.141114 |
| 50 | 1 | 0 | 6.352849  | 1.616895  | -0.262155 |
| 51 | 1 | 0 | 5.850156  | -2.338982 | -1.869903 |
| 52 | 1 | 0 | 7.277372  | -0.345017 | -1.472463 |
| 53 | 6 | 0 | 0.813499  | 2.404130  | 0.166043  |
| 54 | 6 | 0 | 1.362162  | 3.626108  | 0.547147  |
| 55 | 6 | 0 | 0.834962  | 4.297338  | 1.651253  |
| 56 | 1 | 0 | 2.191817  | 4.043245  | -0.014080 |
| 57 | 6 | 0 | -0.720642 | 2.495660  | 1.923037  |
| 58 | 6 | 0 | -0.221596 | 3.718280  | 2.355970  |
| 59 | 1 | 0 | 1.249076  | 5.251123  | 1.962182  |
| 60 | 1 | 0 | -1.537352 | 2.005953  | 2.444868  |
| 61 | 1 | 0 | -0.651316 | 4.199698  | 3.227271  |
| 62 | 7 | 0 | -0.226024 | 1.850134  | 0.845345  |

-----  
**1''(square pyramidal) (singlet) E(B3LYP/ SDD-6-31G(d,p))= -1443.632646 hartree**  
 -----

| Center<br>Number | Atomic<br>Number | Atomic<br>Type | Coordinates (Angstroms) |           |          |
|------------------|------------------|----------------|-------------------------|-----------|----------|
|                  |                  |                | X                       | Y         | Z        |
| 1                | 7                | 0              | 0.842667                | -0.674384 | 1.523899 |
| 2                | 6                | 0              | 1.994125                | 0.069248  | 2.115135 |
| 3                | 1                | 0              | 1.680151                | 1.105629  | 2.277868 |
| 4                | 1                | 0              | 2.286038                | -0.346270 | 3.087676 |
| 5                | 6                | 0              | 1.153554                | -2.145681 | 1.482797 |
| 6                | 1                | 0              | 2.237656                | -2.273630 | 1.555541 |
| 7                | 1                | 0              | 0.719744                | -2.654057 | 2.349964 |
| 8                | 6                | 0              | -0.477334               | -0.425491 | 2.197794 |
| 9                | 1                | 0              | -1.043012               | -1.358359 | 2.158357 |

|    |    |   |           |           |           |
|----|----|---|-----------|-----------|-----------|
| 10 | 1  | 0 | -0.332432 | -0.182109 | 3.256344  |
| 11 | 26 | 0 | 0.752190  | 0.041364  | -0.335867 |
| 12 | 6  | 0 | 3.139331  | 0.004694  | 1.121452  |
| 13 | 6  | 0 | 4.481181  | 0.018717  | 1.488402  |
| 14 | 6  | 0 | 3.697726  | -0.168864 | -1.135344 |
| 15 | 6  | 0 | 5.457147  | -0.052526 | 0.490483  |
| 16 | 1  | 0 | 4.759479  | 0.079221  | 2.535654  |
| 17 | 6  | 0 | 5.058903  | -0.153985 | -0.842255 |
| 18 | 1  | 0 | 3.343151  | -0.247547 | -2.158423 |
| 19 | 1  | 0 | 6.510103  | -0.040559 | 0.753087  |
| 20 | 1  | 0 | 5.784340  | -0.223970 | -1.645035 |
| 21 | 6  | 0 | 0.691483  | -2.752636 | 0.182059  |
| 22 | 6  | 0 | 0.501982  | -4.121415 | 0.004855  |
| 23 | 6  | 0 | 0.176572  | -4.600064 | -1.264363 |
| 24 | 1  | 0 | 0.615961  | -4.800406 | 0.843799  |
| 25 | 6  | 0 | 0.231289  | -2.340098 | -2.059599 |
| 26 | 6  | 0 | 0.046746  | -3.693036 | -2.317929 |
| 27 | 1  | 0 | 0.027774  | -5.662407 | -1.428507 |
| 28 | 1  | 0 | 0.123746  | -1.599690 | -2.847715 |
| 29 | 1  | 0 | -0.200220 | -4.022946 | -3.320717 |
| 30 | 7  | 0 | 2.754343  | -0.081282 | -0.178613 |
| 31 | 7  | 0 | 0.544335  | -1.873232 | -0.833341 |
| 32 | 6  | 0 | -1.249501 | 0.681275  | 1.490673  |
| 33 | 1  | 0 | -2.269732 | 0.737563  | 1.885735  |
| 34 | 1  | 0 | -0.776544 | 1.647711  | 1.674720  |
| 35 | 7  | 0 | -1.269171 | 0.448174  | 0.006691  |
| 36 | 6  | 0 | -1.572304 | 1.730160  | -0.685107 |
| 37 | 1  | 0 | -1.773426 | 1.502134  | -1.738658 |
| 38 | 1  | 0 | -2.480777 | 2.196401  | -0.287981 |
| 39 | 6  | 0 | -2.292189 | -0.606532 | -0.389442 |
| 40 | 1  | 0 | -2.161300 | -0.753406 | -1.464834 |
| 41 | 1  | 0 | -1.988611 | -1.533975 | 0.098991  |
| 42 | 6  | 0 | -3.739038 | -0.297660 | -0.073407 |
| 43 | 6  | 0 | -4.548731 | 0.375931  | -1.001500 |
| 44 | 6  | 0 | -4.312099 | -0.719947 | 1.137012  |
| 45 | 6  | 0 | -5.886713 | 0.647038  | -0.714480 |
| 46 | 1  | 0 | -4.142583 | 0.668227  | -1.967141 |
| 47 | 6  | 0 | -5.649744 | -0.448729 | 1.427024  |
| 48 | 1  | 0 | -3.719787 | -1.291028 | 1.849178  |
| 49 | 6  | 0 | -6.437187 | 0.241013  | 0.503172  |
| 50 | 1  | 0 | -6.502702 | 1.160561  | -1.445865 |
| 51 | 1  | 0 | -6.079887 | -0.787758 | 2.364078  |
| 52 | 1  | 0 | -7.480024 | 0.445559  | 0.723370  |
| 53 | 6  | 0 | -0.398347 | 2.672288  | -0.599070 |

|    |   |   |           |          |           |
|----|---|---|-----------|----------|-----------|
| 54 | 6 | 0 | -0.545573 | 4.045158 | -0.785689 |
| 55 | 6 | 0 | 0.582024  | 4.862640 | -0.749273 |
| 56 | 1 | 0 | -1.531963 | 4.463032 | -0.958407 |
| 57 | 6 | 0 | 1.899079  | 2.904981 | -0.331728 |
| 58 | 6 | 0 | 1.828633  | 4.278371 | -0.517596 |
| 59 | 1 | 0 | 0.490026  | 5.934292 | -0.894288 |
| 60 | 1 | 0 | 2.849881  | 2.422066 | -0.146681 |
| 61 | 1 | 0 | 2.733415  | 4.874405 | -0.477843 |
| 62 | 7 | 0 | 0.810472  | 2.100260 | -0.367807 |

-----  
**1''(square pyramidal) (triplet) E(B3LYP/ SDD-6-31G(d,p))= -1443.644055 hartree**  
 -----

| Center<br>Number | Atomic<br>Number | Atomic<br>Type | Coordinates (Angstroms) |           |           |
|------------------|------------------|----------------|-------------------------|-----------|-----------|
|                  |                  |                | X                       | Y         | Z         |
| 1                | 7                | 0              | 0.803053                | -0.875684 | 1.610056  |
| 2                | 6                | 0              | 1.949737                | -0.205803 | 2.271588  |
| 3                | 1                | 0              | 1.635297                | 0.804545  | 2.559086  |
| 4                | 1                | 0              | 2.258433                | -0.720240 | 3.191329  |
| 5                | 6                | 0              | 1.062016                | -2.319522 | 1.380785  |
| 6                | 1                | 0              | 2.129735                | -2.511703 | 1.531352  |
| 7                | 1                | 0              | 0.536597                | -2.936470 | 2.118891  |
| 8                | 6                | 0              | -0.527463               | -0.595077 | 2.222972  |
| 9                | 1                | 0              | -1.143120               | -1.488865 | 2.107672  |
| 10               | 1                | 0              | -0.439293               | -0.412888 | 3.301112  |
| 11               | 26               | 0              | 0.758764                | 0.167803  | -0.300252 |
| 12               | 6                | 0              | 3.102797                | -0.125803 | 1.288209  |
| 13               | 6                | 0              | 4.437458                | -0.217354 | 1.674130  |
| 14               | 6                | 0              | 3.717687                | 0.082129  | -0.952984 |
| 15               | 6                | 0              | 5.436687                | -0.145639 | 0.701419  |
| 16               | 1                | 0              | 4.689700                | -0.349186 | 2.721283  |
| 17               | 6                | 0              | 5.069778                | -0.001517 | -0.636754 |
| 18               | 1                | 0              | 3.387658                | 0.195847  | -1.981077 |
| 19               | 1                | 0              | 6.482395                | -0.213985 | 0.983676  |
| 20               | 1                | 0              | 5.812120                | 0.042839  | -1.425780 |
| 21               | 6                | 0              | 0.707030                | -2.761979 | -0.028363 |
| 22               | 6                | 0              | 0.546827                | -4.111995 | -0.341360 |
| 23               | 6                | 0              | 0.315060                | -4.482486 | -1.665051 |
| 24               | 1                | 0              | 0.610463                | -4.861306 | 0.441535  |
| 25               | 6                | 0              | 0.385567                | -2.163097 | -2.252524 |
| 26               | 6                | 0              | 0.239843                | -3.488353 | -2.642659 |
| 27               | 1                | 0              | 0.193044                | -5.528156 | -1.928848 |
| 28               | 1                | 0              | 0.313502                | -1.357412 | -2.977278 |
| 29               | 1                | 0              | 0.062071                | -3.730337 | -3.684451 |

|    |   |   |           |           |           |
|----|---|---|-----------|-----------|-----------|
| 30 | 7 | 0 | 2.750797  | 0.033897  | -0.013838 |
| 31 | 7 | 0 | 0.615444  | -1.801494 | -0.971993 |
| 32 | 6 | 0 | -1.213459 | 0.603992  | 1.560263  |
| 33 | 1 | 0 | -2.229712 | 0.715935  | 1.954522  |
| 34 | 1 | 0 | -0.672376 | 1.525832  | 1.795336  |
| 35 | 7 | 0 | -1.257071 | 0.475240  | 0.058111  |
| 36 | 6 | 0 | -1.638309 | 1.785047  | -0.544944 |
| 37 | 1 | 0 | -1.935293 | 1.595232  | -1.582173 |
| 38 | 1 | 0 | -2.511456 | 2.216224  | -0.043884 |
| 39 | 6 | 0 | -2.240826 | -0.598844 | -0.392953 |
| 40 | 1 | 0 | -2.114328 | -0.672770 | -1.475742 |
| 41 | 1 | 0 | -1.894411 | -1.540395 | 0.033518  |
| 42 | 6 | 0 | -3.694066 | -0.360697 | -0.045972 |
| 43 | 6 | 0 | -4.543550 | 0.298835  | -0.948373 |
| 44 | 6 | 0 | -4.233976 | -0.835335 | 1.160586  |
| 45 | 6 | 0 | -5.888308 | 0.505365  | -0.640537 |
| 46 | 1 | 0 | -4.162588 | 0.630276  | -1.911629 |
| 47 | 6 | 0 | -5.578291 | -0.628403 | 1.471505  |
| 48 | 1 | 0 | -3.612007 | -1.398132 | 1.853376  |
| 49 | 6 | 0 | -6.405896 | 0.048254  | 0.573274  |
| 50 | 1 | 0 | -6.534383 | 1.008322  | -1.353024 |
| 51 | 1 | 0 | -5.982192 | -1.007648 | 2.404816  |
| 52 | 1 | 0 | -7.453743 | 0.202383  | 0.810107  |
| 53 | 6 | 0 | -0.480514 | 2.747891  | -0.549362 |
| 54 | 6 | 0 | -0.669368 | 4.125354  | -0.639411 |
| 55 | 6 | 0 | 0.442628  | 4.961149  | -0.722520 |
| 56 | 1 | 0 | -1.674968 | 4.532611  | -0.649200 |
| 57 | 6 | 0 | 1.832842  | 3.013773  | -0.595719 |
| 58 | 6 | 0 | 1.717711  | 4.392309  | -0.702324 |
| 59 | 1 | 0 | 0.317317  | 6.036626  | -0.797659 |
| 60 | 1 | 0 | 2.804297  | 2.537437  | -0.566136 |
| 61 | 1 | 0 | 2.610551  | 5.004277  | -0.763024 |
| 62 | 7 | 0 | 0.757915  | 2.194480  | -0.522147 |

-----  
**1''(square pyramidal) (quintet) E(B3LYP/ SDD-6-31G(d,p))= -1443.662767 hartree**  
 -----

| Center<br>Number | Atomic<br>Number | Atomic<br>Type | Coordinates (Angstroms) |           |          |
|------------------|------------------|----------------|-------------------------|-----------|----------|
|                  |                  |                | X                       | Y         | Z        |
| 1                | 7                | 0              | 0.817539                | -0.960450 | 1.473444 |
| 2                | 6                | 0              | 1.915208                | -0.341168 | 2.256364 |
| 3                | 1                | 0              | 1.577836                | 0.648501  | 2.585548 |
| 4                | 1                | 0              | 2.140273                | -0.918003 | 3.163491 |
| 5                | 6                | 0              | 1.093923                | -2.396403 | 1.193839 |

|    |    |   |           |           |           |
|----|----|---|-----------|-----------|-----------|
| 6  | 1  | 0 | 2.177670  | -2.549504 | 1.239744  |
| 7  | 1  | 0 | 0.658060  | -3.040706 | 1.966563  |
| 8  | 6  | 0 | -0.521922 | -0.743827 | 2.095852  |
| 9  | 1  | 0 | -1.142910 | -1.609066 | 1.857941  |
| 10 | 1  | 0 | -0.441327 | -0.708723 | 3.189522  |
| 11 | 26 | 0 | 0.845276  | 0.106228  | -0.467693 |
| 12 | 6  | 0 | 3.163092  | -0.193342 | 1.405197  |
| 13 | 6  | 0 | 4.443228  | -0.264206 | 1.952109  |
| 14 | 6  | 0 | 4.040579  | 0.135636  | -0.725590 |
| 15 | 6  | 0 | 5.549939  | -0.115326 | 1.115402  |
| 16 | 1  | 0 | 4.570853  | -0.438700 | 3.015625  |
| 17 | 6  | 0 | 5.346082  | 0.080991  | -0.251518 |
| 18 | 1  | 0 | 3.838391  | 0.273729  | -1.784216 |
| 19 | 1  | 0 | 6.554930  | -0.166319 | 1.522217  |
| 20 | 1  | 0 | 6.178294  | 0.182737  | -0.939028 |
| 21 | 6  | 0 | 0.630409  | -2.832826 | -0.184243 |
| 22 | 6  | 0 | 0.320792  | -4.165339 | -0.452494 |
| 23 | 6  | 0 | 0.005891  | -4.544119 | -1.757798 |
| 24 | 1  | 0 | 0.332539  | -4.896967 | 0.349054  |
| 25 | 6  | 0 | 0.307022  | -2.265061 | -2.421635 |
| 26 | 6  | 0 | 0.004740  | -3.576952 | -2.764219 |
| 27 | 1  | 0 | -0.235030 | -5.577825 | -1.984851 |
| 28 | 1  | 0 | 0.306971  | -1.478845 | -3.170805 |
| 29 | 1  | 0 | -0.230320 | -3.829058 | -3.792135 |
| 30 | 7  | 0 | 2.966464  | 0.015263  | 0.082570  |
| 31 | 7  | 0 | 0.611298  | -1.893147 | -1.159314 |
| 32 | 6  | 0 | -1.191941 | 0.535908  | 1.591411  |
| 33 | 1  | 0 | -2.177468 | 0.637893  | 2.062226  |
| 34 | 1  | 0 | -0.603824 | 1.412509  | 1.884447  |
| 35 | 7  | 0 | -1.315240 | 0.552026  | 0.103548  |
| 36 | 6  | 0 | -1.669957 | 1.912378  | -0.370777 |
| 37 | 1  | 0 | -2.123356 | 1.812169  | -1.362809 |
| 38 | 1  | 0 | -2.430990 | 2.377643  | 0.265956  |
| 39 | 6  | 0 | -2.328691 | -0.456718 | -0.410015 |
| 40 | 1  | 0 | -2.252731 | -0.422182 | -1.500723 |
| 41 | 1  | 0 | -1.981114 | -1.443910 | -0.101263 |
| 42 | 6  | 0 | -3.764603 | -0.245211 | 0.021208  |
| 43 | 6  | 0 | -4.645826 | 0.505904  | -0.772051 |
| 44 | 6  | 0 | -4.254018 | -0.824344 | 1.203269  |
| 45 | 6  | 0 | -5.970867 | 0.698300  | -0.380458 |
| 46 | 1  | 0 | -4.307123 | 0.921674  | -1.718164 |
| 47 | 6  | 0 | -5.578412 | -0.632285 | 1.598132  |
| 48 | 1  | 0 | -3.608325 | -1.455507 | 1.810201  |
| 49 | 6  | 0 | -6.437332 | 0.135369  | 0.809203  |

|    |   |   |           |           |           |
|----|---|---|-----------|-----------|-----------|
| 50 | 1 | 0 | -6.641808 | 1.273895  | -1.010254 |
| 51 | 1 | 0 | -5.942764 | -1.092250 | 2.511259  |
| 52 | 1 | 0 | -7.469836 | 0.279295  | 1.110961  |
| 53 | 6 | 0 | -0.469870 | 2.819773  | -0.513409 |
| 54 | 6 | 0 | -0.610776 | 4.207388  | -0.493839 |
| 55 | 6 | 0 | 0.499211  | 5.010684  | -0.745556 |
| 56 | 1 | 0 | -1.581800 | 4.647670  | -0.291747 |
| 57 | 6 | 0 | 1.801680  | 3.017482  | -0.981874 |
| 58 | 6 | 0 | 1.730378  | 4.402650  | -1.000858 |
| 59 | 1 | 0 | 0.406987  | 6.092154  | -0.740617 |
| 60 | 1 | 0 | 2.742835  | 2.507835  | -1.152042 |
| 61 | 1 | 0 | 2.619881  | 4.988305  | -1.203580 |
| 62 | 7 | 0 | 0.725691  | 2.231683  | -0.745448 |

-----

**1''<sub>pt-A</sub>** (quintet) E(B3LYP/ SDD-6-31G(d,p))= -1443.82407786 hartree

| Center<br>Number | Atomic<br>Number | Atomic<br>Type | Coordinates (Angstroms) |           |           |
|------------------|------------------|----------------|-------------------------|-----------|-----------|
|                  |                  |                | X                       | Y         | Z         |
| 1                | 7                | 0              | -1.907375               | -1.076183 | -1.301580 |
| 2                | 6                | 0              | -2.775330               | -0.208346 | -2.145842 |
| 3                | 1                | 0              | -2.156718               | 0.255804  | -2.921495 |
| 4                | 1                | 0              | -3.534207               | -0.798491 | -2.672272 |
| 5                | 6                | 0              | -2.687279               | -2.148630 | -0.616768 |
| 6                | 1                | 0              | -3.725545               | -1.806392 | -0.539960 |
| 7                | 1                | 0              | -2.704384               | -3.064522 | -1.218913 |
| 8                | 6                | 0              | -0.698697               | -1.591570 | -2.008785 |
| 9                | 1                | 0              | -0.336079               | -2.461055 | -1.454741 |
| 10               | 1                | 0              | -0.948739               | -1.942383 | -3.018330 |
| 11               | 26               | 0              | -1.096981               | 0.168248  | 0.225128  |
| 12               | 6                | 0              | -3.430681               | 0.888067  | -1.321257 |
| 13               | 6                | 0              | -4.650363               | 1.447599  | -1.690482 |
| 14               | 6                | 0              | -3.281064               | 2.336668  | 0.513383  |
| 15               | 6                | 0              | -5.184625               | 2.490800  | -0.930606 |
| 16               | 1                | 0              | -5.177992               | 1.071806  | -2.561425 |
| 17               | 6                | 0              | -4.487071               | 2.942722  | 0.192500  |
| 18               | 1                | 0              | -2.719155               | 2.643490  | 1.390334  |
| 19               | 1                | 0              | -6.135612               | 2.936546  | -1.205886 |
| 20               | 1                | 0              | -4.874695               | 3.741825  | 0.814742  |
| 21               | 6                | 0              | -2.192871               | -2.440835 | 0.790956  |
| 22               | 6                | 0              | -2.488188               | -3.650722 | 1.414622  |
| 23               | 6                | 0              | -2.134844               | -3.835504 | 2.752428  |
| 24               | 1                | 0              | -3.000041               | -4.434477 | 0.864994  |

|    |   |   |           |           |           |
|----|---|---|-----------|-----------|-----------|
| 25 | 6 | 0 | -1.205328 | -1.629274 | 2.750477  |
| 26 | 6 | 0 | -1.487077 | -2.802362 | 3.435178  |
| 27 | 1 | 0 | -2.364791 | -4.770080 | 3.254860  |
| 28 | 1 | 0 | -0.699449 | -0.804093 | 3.242268  |
| 29 | 1 | 0 | -1.204402 | -2.903561 | 4.477184  |
| 30 | 7 | 0 | -2.749697 | 1.333658  | -0.228619 |
| 31 | 7 | 0 | -1.543537 | -1.444990 | 1.450686  |
| 32 | 6 | 0 | 0.383013  | -0.513434 | -2.121511 |
| 33 | 1 | 0 | 1.239748  | -0.903355 | -2.675962 |
| 34 | 1 | 0 | -0.002489 | 0.329892  | -2.701147 |
| 35 | 7 | 0 | 0.841071  | 0.048013  | -0.783686 |
| 36 | 6 | 0 | 1.625932  | 1.294394  | -1.114590 |
| 37 | 1 | 0 | 2.504742  | 1.001598  | -1.700764 |
| 38 | 1 | 0 | 0.995799  | 1.903930  | -1.766121 |
| 39 | 6 | 0 | 1.672796  | -0.972336 | 0.013686  |
| 40 | 1 | 0 | 1.685015  | -0.610486 | 1.046438  |
| 41 | 1 | 0 | 1.084374  | -1.892681 | 0.016440  |
| 42 | 6 | 0 | 3.100048  | -1.249669 | -0.422501 |
| 43 | 6 | 0 | 4.149687  | -0.922968 | 0.461849  |
| 44 | 6 | 0 | 3.425726  | -1.914025 | -1.617236 |
| 45 | 6 | 0 | 5.481154  | -1.202366 | 0.138151  |
| 46 | 1 | 0 | 3.917202  | -0.533841 | 1.452590  |
| 47 | 6 | 0 | 4.757287  | -2.179794 | -1.946881 |
| 48 | 1 | 0 | 2.651928  | -2.277510 | -2.285951 |
| 49 | 6 | 0 | 5.788460  | -1.813746 | -1.079509 |
| 50 | 1 | 0 | 6.271571  | -0.973240 | 0.846343  |
| 51 | 1 | 0 | 4.986345  | -2.696494 | -2.873413 |
| 52 | 1 | 0 | 6.819672  | -2.035550 | -1.334234 |
| 53 | 6 | 0 | 2.070646  | 2.199742  | 0.018779  |
| 54 | 6 | 0 | 1.317521  | 3.267242  | 0.494543  |
| 55 | 6 | 0 | 1.862690  | 4.158834  | 1.429954  |
| 56 | 1 | 0 | 0.322435  | 3.436545  | 0.095840  |
| 57 | 6 | 0 | 3.902711  | 2.910518  | 1.387614  |
| 58 | 6 | 0 | 3.172072  | 3.982270  | 1.880516  |
| 59 | 1 | 0 | 1.275788  | 5.001546  | 1.783051  |
| 60 | 1 | 0 | 4.927418  | 2.699946  | 1.674237  |
| 61 | 1 | 0 | 3.628898  | 4.665257  | 2.588399  |
| 62 | 7 | 0 | 3.339624  | 2.070514  | 0.492990  |
| 63 | 1 | 0 | 3.896324  | 1.268828  | 0.169010  |

-----  
**1''<sub>pt-A</sub>** (singlet) E(B3LYP/ SDD-6-31G(d,p))= -1443.75517498 hartree  
 -----

| Center | Atomic | Atomic | Coordinates (Angstroms) |
|--------|--------|--------|-------------------------|
|--------|--------|--------|-------------------------|

| Number | Number | Type | X         | Y         | Z         |
|--------|--------|------|-----------|-----------|-----------|
| 1      | 7      | 0    | -2.177050 | -0.822807 | -1.100405 |
| 2      | 6      | 0    | -2.930782 | 0.166226  | -1.954268 |
| 3      | 1      | 0    | -2.474626 | 0.202308  | -2.949061 |
| 4      | 1      | 0    | -3.956251 | -0.183366 | -2.104542 |
| 5      | 6      | 0    | -3.079157 | -1.866938 | -0.507609 |
| 6      | 1      | 0    | -4.017629 | -1.376543 | -0.223566 |
| 7      | 1      | 0    | -3.327261 | -2.631696 | -1.252770 |
| 8      | 6      | 0    | -1.029470 | -1.441713 | -1.844427 |
| 9      | 1      | 0    | -0.750255 | -2.361989 | -1.328610 |
| 10     | 1      | 0    | -1.332659 | -1.716162 | -2.861122 |
| 11     | 26     | 0    | -1.329305 | 0.075951  | 0.413454  |
| 12     | 6      | 0    | -2.926882 | 1.551731  | -1.344913 |
| 13     | 6      | 0    | -3.767210 | 2.559057  | -1.814553 |
| 14     | 6      | 0    | -1.987277 | 3.006134  | 0.222743  |
| 15     | 6      | 0    | -3.698272 | 3.827527  | -1.238948 |
| 16     | 1      | 0    | -4.468294 | 2.352556  | -2.617369 |
| 17     | 6      | 0    | -2.790428 | 4.054351  | -0.199192 |
| 18     | 1      | 0    | -1.283110 | 3.137672  | 1.039450  |
| 19     | 1      | 0    | -4.347088 | 4.624380  | -1.589244 |
| 20     | 1      | 0    | -2.715486 | 5.023265  | 0.282071  |
| 21     | 6      | 0    | -2.438745 | -2.469638 | 0.724971  |
| 22     | 6      | 0    | -2.829147 | -3.702841 | 1.237312  |
| 23     | 6      | 0    | -2.270307 | -4.147710 | 2.437037  |
| 24     | 1      | 0    | -3.567074 | -4.301920 | 0.713099  |
| 25     | 6      | 0    | -0.969626 | -2.136814 | 2.506119  |
| 26     | 6      | 0    | -1.327718 | -3.345350 | 3.086061  |
| 27     | 1      | 0    | -2.565995 | -5.103519 | 2.858467  |
| 28     | 1      | 0    | -0.229723 | -1.496175 | 2.975979  |
| 29     | 1      | 0    | -0.874524 | -3.652265 | 4.022234  |
| 30     | 7      | 0    | -2.040866 | 1.770503  | -0.336560 |
| 31     | 7      | 0    | -1.506111 | -1.694083 | 1.343903  |
| 32     | 6      | 0    | 0.122168  | -0.451441 | -1.885024 |
| 33     | 1      | 0    | 0.974987  | -0.871553 | -2.426007 |
| 34     | 1      | 0    | -0.185545 | 0.455836  | -2.410677 |
| 35     | 7      | 0    | 0.553797  | -0.047446 | -0.484482 |
| 36     | 6      | 0    | 1.313966  | 1.234484  | -0.685600 |
| 37     | 1      | 0    | 2.088338  | 1.053117  | -1.440024 |
| 38     | 1      | 0    | 0.609581  | 1.956390  | -1.110489 |
| 39     | 6      | 0    | 1.459854  | -1.157800 | 0.105366  |
| 40     | 1      | 0    | 1.687317  | -0.864915 | 1.134042  |
| 41     | 1      | 0    | 0.823902  | -2.039407 | 0.171746  |
| 42     | 6      | 0    | 2.732344  | -1.473830 | -0.641640 |



|    |   |   |          |           |           |
|----|---|---|----------|-----------|-----------|
| 43 | 6 | 0 | 3.935647 | -0.813346 | -0.339243 |
| 44 | 6 | 0 | 2.749979 | -2.495996 | -1.607555 |
| 45 | 6 | 0 | 5.115151 | -1.139587 | -1.008389 |
| 46 | 1 | 0 | 3.968988 | -0.069472 | 0.453691  |
| 47 | 6 | 0 | 3.928425 | -2.821726 | -2.279024 |
| 48 | 1 | 0 | 1.848783 | -3.069389 | -1.814249 |
| 49 | 6 | 0 | 5.110859 | -2.138340 | -1.985573 |
| 50 | 1 | 0 | 6.040982 | -0.633269 | -0.754851 |
| 51 | 1 | 0 | 3.928942 | -3.619369 | -3.014754 |
| 52 | 1 | 0 | 6.030465 | -2.398948 | -2.499463 |
| 53 | 6 | 0 | 2.024104 | 1.945662  | 0.456368  |
| 54 | 6 | 0 | 2.922012 | 2.969135  | 0.153590  |
| 55 | 6 | 0 | 3.552147 | 3.686314  | 1.172126  |
| 56 | 1 | 0 | 3.129930 | 3.199541  | -0.886298 |
| 57 | 6 | 0 | 2.407137 | 2.357559  | 2.795005  |
| 58 | 6 | 0 | 3.292142 | 3.377410  | 2.514955  |
| 59 | 1 | 0 | 4.250842 | 4.479137  | 0.920828  |
| 60 | 1 | 0 | 2.156706 | 2.034706  | 3.799134  |
| 61 | 1 | 0 | 3.774704 | 3.910828  | 3.326694  |
| 62 | 7 | 0 | 1.801835 | 1.689898  | 1.771502  |
| 63 | 1 | 0 | 1.196277 | 0.917925  | 2.024015  |

-----  
**1''<sub>pt-A</sub>** (triplet) E(B3LYP/ SDD-6-31G(d,p))= -1443.77853873 hartree

| Center<br>Number | Atomic<br>Number | Atomic<br>Type | Coordinates (Angstroms) |           |           |
|------------------|------------------|----------------|-------------------------|-----------|-----------|
|                  |                  |                | X                       | Y         | Z         |
| 1                | 7                | 0              | -1.885546               | -0.902753 | -1.202826 |
| 2                | 6                | 0              | -2.610789               | -0.025342 | -2.184669 |
| 3                | 1                | 0              | -1.890388               | 0.340812  | -2.922281 |
| 4                | 1                | 0              | -3.352796               | -0.611203 | -2.737111 |
| 5                | 6                | 0              | -2.813089               | -1.937292 | -0.628216 |
| 6                | 1                | 0              | -3.809846               | -1.486577 | -0.563302 |
| 7                | 1                | 0              | -2.887620               | -2.794117 | -1.307344 |
| 8                | 6                | 0              | -0.644884               | -1.516445 | -1.780812 |
| 9                | 1                | 0              | -0.370574               | -2.361558 | -1.145801 |
| 10               | 1                | 0              | -0.849992               | -1.915005 | -2.781904 |
| 11               | 26               | 0              | -1.263817               | 0.193643  | 0.302561  |
| 12               | 6                | 0              | -3.243131               | 1.152128  | -1.476434 |
| 13               | 6                | 0              | -4.341348               | 1.836867  | -1.984712 |
| 14               | 6                | 0              | -3.108329               | 2.617514  | 0.343578  |
| 15               | 6                | 0              | -4.821482               | 2.955022  | -1.297103 |
| 16               | 1                | 0              | -4.816735               | 1.504335  | -2.902079 |

|    |   |   |           |           |           |
|----|---|---|-----------|-----------|-----------|
| 17 | 6 | 0 | -4.193800 | 3.352015  | -0.113242 |
| 18 | 1 | 0 | -2.604654 | 2.880621  | 1.269092  |
| 19 | 1 | 0 | -5.678540 | 3.502956  | -1.676663 |
| 20 | 1 | 0 | -4.544149 | 4.208991  | 0.451417  |
| 21 | 6 | 0 | -2.378404 | -2.355888 | 0.758639  |
| 22 | 6 | 0 | -2.753647 | -3.570443 | 1.323262  |
| 23 | 6 | 0 | -2.409888 | -3.835354 | 2.651268  |
| 24 | 1 | 0 | -3.315525 | -4.294001 | 0.741173  |
| 25 | 6 | 0 | -1.334784 | -1.696225 | 2.743875  |
| 26 | 6 | 0 | -1.692390 | -2.879119 | 3.375477  |
| 27 | 1 | 0 | -2.699354 | -4.773930 | 3.113956  |
| 28 | 1 | 0 | -0.771620 | -0.931216 | 3.269655  |
| 29 | 1 | 0 | -1.413185 | -3.047090 | 4.409798  |
| 30 | 7 | 0 | -2.631791 | 1.539507  | -0.323719 |
| 31 | 7 | 0 | -1.667080 | -1.431795 | 1.457973  |
| 32 | 6 | 0 | 0.482712  | -0.493136 | -1.862009 |
| 33 | 1 | 0 | 1.360869  | -0.966167 | -2.314103 |
| 34 | 1 | 0 | 0.190316  | 0.330792  | -2.518684 |
| 35 | 7 | 0 | 0.859255  | 0.106844  | -0.522017 |
| 36 | 6 | 0 | 1.649946  | 1.333294  | -0.882419 |
| 37 | 1 | 0 | 2.427838  | 1.050275  | -1.600542 |
| 38 | 1 | 0 | 0.967980  | 2.015325  | -1.405275 |
| 39 | 6 | 0 | 1.701801  | -0.898387 | 0.293175  |
| 40 | 1 | 0 | 1.949113  | -0.398266 | 1.233944  |
| 41 | 1 | 0 | 1.021592  | -1.715210 | 0.544255  |
| 42 | 6 | 0 | 2.952206  | -1.439471 | -0.358318 |
| 43 | 6 | 0 | 4.190795  | -0.797451 | -0.191351 |
| 44 | 6 | 0 | 2.910024  | -2.636020 | -1.095638 |
| 45 | 6 | 0 | 5.347394  | -1.316890 | -0.773254 |
| 46 | 1 | 0 | 4.266367  | 0.089635  | 0.432732  |
| 47 | 6 | 0 | 4.064987  | -3.156060 | -1.679636 |
| 48 | 1 | 0 | 1.977753  | -3.189370 | -1.188508 |
| 49 | 6 | 0 | 5.284433  | -2.492337 | -1.525390 |
| 50 | 1 | 0 | 6.300458  | -0.819734 | -0.623676 |
| 51 | 1 | 0 | 4.018222  | -4.085623 | -2.237608 |
| 52 | 1 | 0 | 6.185648  | -2.901648 | -1.970267 |
| 53 | 6 | 0 | 2.362078  | 2.156028  | 0.176842  |
| 54 | 6 | 0 | 3.477497  | 2.915589  | -0.170563 |
| 55 | 6 | 0 | 4.077341  | 3.764096  | 0.763481  |
| 56 | 1 | 0 | 3.874839  | 2.842095  | -1.177304 |
| 57 | 6 | 0 | 2.471043  | 3.076650  | 2.394175  |
| 58 | 6 | 0 | 3.569513  | 3.845615  | 2.066602  |
| 59 | 1 | 0 | 4.943298  | 4.354335  | 0.478004  |
| 60 | 1 | 0 | 2.017721  | 3.063209  | 3.378675  |

|    |   |   |          |          |          |
|----|---|---|----------|----------|----------|
| 61 | 1 | 0 | 4.020668 | 4.487531 | 2.815272 |
| 62 | 7 | 0 | 1.904842 | 2.276030 | 1.449991 |
| 63 | 1 | 0 | 1.108966 | 1.716496 | 1.732439 |

-----

**1''<sub>pt-B</sub>** (quintet) E(B3LYP/ SDD-6-31G(d,p))= -1443.81548947 hartree

-----

| Center<br>Number | Atomic<br>Number | Atomic<br>Type | Coordinates (Angstroms) |           |           |
|------------------|------------------|----------------|-------------------------|-----------|-----------|
|                  |                  |                | X                       | Y         | Z         |
| 1                | 7                | 0              | -1.396382               | -0.918255 | -0.970206 |
| 2                | 6                | 0              | -2.241888               | -0.319464 | -2.067099 |
| 3                | 1                | 0              | -1.633069               | 0.432157  | -2.577108 |
| 4                | 1                | 0              | -2.453806               | -1.101668 | -2.807387 |
| 5                | 6                | 0              | -2.145706               | -2.012553 | -0.274022 |
| 6                | 1                | 0              | -3.133561               | -1.622686 | -0.007765 |
| 7                | 1                | 0              | -2.302082               | -2.860906 | -0.952943 |
| 8                | 6                | 0              | -0.147073               | -1.484502 | -1.625295 |
| 9                | 1                | 0              | 0.240813                | -2.258714 | -0.958237 |
| 10               | 1                | 0              | -0.409752               | -1.980666 | -2.567953 |
| 11               | 26               | 0              | -0.337299               | 0.138106  | 0.720554  |
| 12               | 6                | 0              | -3.579021               | 0.298399  | -1.697637 |
| 13               | 6                | 0              | -4.784197               | -0.394432 | -1.730103 |
| 14               | 6                | 0              | -4.788869               | 2.317754  | -1.213123 |
| 15               | 6                | 0              | -5.995167               | 0.270411  | -1.489570 |
| 16               | 1                | 0              | -4.785195               | -1.450953 | -1.975602 |
| 17               | 6                | 0              | -5.998380               | 1.641912  | -1.222975 |
| 18               | 1                | 0              | -4.698854               | 3.385642  | -1.047059 |
| 19               | 1                | 0              | -6.930724               | -0.280044 | -1.530016 |
| 20               | 1                | 0              | -6.919768               | 2.186986  | -1.048101 |
| 21               | 6                | 0              | -1.485762               | -2.498076 | 1.005061  |
| 22               | 6                | 0              | -1.696397               | -3.792445 | 1.469504  |
| 23               | 6                | 0              | -1.165558               | -4.172036 | 2.705866  |
| 24               | 1                | 0              | -2.274000               | -4.496765 | 0.879266  |
| 25               | 6                | 0              | -0.230470               | -1.978048 | 2.911988  |
| 26               | 6                | 0              | -0.424837               | -3.246260 | 3.442965  |
| 27               | 1                | 0              | -1.326752               | -5.176983 | 3.083948  |
| 28               | 1                | 0              | 0.353213                | -1.232629 | 3.443401  |
| 29               | 1                | 0              | 0.003629                | -3.500906 | 4.406116  |
| 30               | 7                | 0              | -3.639417               | 1.637400  | -1.441535 |
| 31               | 7                | 0              | -0.752873               | -1.603866 | 1.718187  |
| 32               | 6                | 0              | 0.924462                | -0.420623 | -1.868249 |
| 33               | 1                | 0              | 1.782609                | -0.874086 | -2.374980 |
| 34               | 1                | 0              | 0.553144                | 0.359634  | -2.537946 |

|    |   |   |           |           |           |
|----|---|---|-----------|-----------|-----------|
| 35 | 7 | 0 | 1.337120  | 0.209899  | -0.577389 |
| 36 | 6 | 0 | 1.661715  | 1.662950  | -0.707697 |
| 37 | 1 | 0 | 2.715533  | 1.801547  | -0.967798 |
| 38 | 1 | 0 | 1.081561  | 2.073118  | -1.542409 |
| 39 | 6 | 0 | 2.484617  | -0.556803 | 0.113627  |
| 40 | 1 | 0 | 2.611569  | -0.076101 | 1.089820  |
| 41 | 1 | 0 | 2.109344  | -1.569689 | 0.289015  |
| 42 | 6 | 0 | 3.795853  | -0.601264 | -0.627342 |
| 43 | 6 | 0 | 4.775909  | 0.381569  | -0.404509 |
| 44 | 6 | 0 | 4.079012  | -1.652343 | -1.516691 |
| 45 | 6 | 0 | 5.993207  | 0.335561  | -1.084324 |
| 46 | 1 | 0 | 4.607801  | 1.162392  | 0.334478  |
| 47 | 6 | 0 | 5.296076  | -1.697168 | -2.196968 |
| 48 | 1 | 0 | 3.366734  | -2.464152 | -1.650415 |
| 49 | 6 | 0 | 6.250267  | -0.698522 | -1.987808 |
| 50 | 1 | 0 | 6.747879  | 1.092093  | -0.895071 |
| 51 | 1 | 0 | 5.508280  | -2.519240 | -2.872830 |
| 52 | 1 | 0 | 7.201248  | -0.739424 | -2.508969 |
| 53 | 6 | 0 | 1.311793  | 2.449262  | 0.544354  |
| 54 | 6 | 0 | 2.011588  | 3.597090  | 0.903827  |
| 55 | 6 | 0 | 1.598386  | 4.334553  | 2.016505  |
| 56 | 1 | 0 | 2.871621  | 3.911188  | 0.321106  |
| 57 | 6 | 0 | -0.165107 | 2.748037  | 2.343741  |
| 58 | 6 | 0 | 0.489320  | 3.903240  | 2.748326  |
| 59 | 1 | 0 | 2.138342  | 5.229560  | 2.310355  |
| 60 | 1 | 0 | -1.023083 | 2.368999  | 2.890759  |
| 61 | 1 | 0 | 0.141170  | 4.445097  | 3.620812  |
| 62 | 7 | 0 | 0.232100  | 2.030458  | 1.263159  |
| 63 | 1 | 0 | -2.780527 | 2.179803  | -1.480500 |

-----  
**1''<sub>pt-B</sub>** (singlet) E(B3LYP/ SDD-6-31G(d,p))= -1443.77206003 hartree  
 -----

| Center<br>Number | Atomic<br>Number | Atomic<br>Type | Coordinates (Angstroms) |           |           |
|------------------|------------------|----------------|-------------------------|-----------|-----------|
|                  |                  |                | X                       | Y         | Z         |
| 1                | 7                | 0              | -1.445932               | -1.210773 | -0.598129 |
| 2                | 6                | 0              | -2.460728               | -1.104585 | -1.717999 |
| 3                | 1                | 0              | -1.971058               | -0.590624 | -2.550808 |
| 4                | 1                | 0              | -2.684009               | -2.119049 | -2.070408 |
| 5                | 6                | 0              | -2.011087               | -1.972866 | 0.560468  |
| 6                | 1                | 0              | -3.022350               | -1.601114 | 0.752139  |
| 7                | 1                | 0              | -2.093559               | -3.042054 | 0.328441  |
| 8                | 6                | 0              | -0.247911               | -1.955888 | -1.169079 |
| 9                | 1                | 0              | 0.217969                | -2.498156 | -0.344659 |

|    |    |   |           |           |           |
|----|----|---|-----------|-----------|-----------|
| 10 | 1  | 0 | -0.573844 | -2.702809 | -1.901842 |
| 11 | 26 | 0 | -0.484602 | 0.470445  | 0.222599  |
| 12 | 6  | 0 | -3.799876 | -0.441721 | -1.443817 |
| 13 | 6  | 0 | -4.924584 | -1.128209 | -0.999178 |
| 14 | 6  | 0 | -5.145971 | 1.535312  | -1.691009 |
| 15 | 6  | 0 | -6.160600 | -0.475373 | -0.884829 |
| 16 | 1  | 0 | -4.849614 | -2.186643 | -0.774274 |
| 17 | 6  | 0 | -6.272594 | 0.873955  | -1.228634 |
| 18 | 1  | 0 | -5.146890 | 2.571027  | -2.012947 |
| 19 | 1  | 0 | -7.033428 | -1.027473 | -0.548205 |
| 20 | 1  | 0 | -7.217889 | 1.402401  | -1.166171 |
| 21 | 6  | 0 | -1.188284 | -1.746747 | 1.807806  |
| 22 | 6  | 0 | -1.212554 | -2.625010 | 2.886069  |
| 23 | 6  | 0 | -0.506290 | -2.298593 | 4.046151  |
| 24 | 1  | 0 | -1.778764 | -3.548906 | 2.823590  |
| 25 | 6  | 0 | 0.209681  | -0.277625 | 2.972667  |
| 26 | 6  | 0 | 0.209804  | -1.100163 | 4.090979  |
| 27 | 1  | 0 | -0.514103 | -2.970052 | 4.899220  |
| 28 | 1  | 0 | 0.770577  | 0.648861  | 2.953434  |
| 29 | 1  | 0 | 0.769246  | -0.808830 | 4.973218  |
| 30 | 7  | 0 | -3.967849 | 0.871449  | -1.777888 |
| 31 | 7  | 0 | -0.475233 | -0.590872 | 1.846286  |
| 32 | 6  | 0 | 0.748264  | -0.985498 | -1.791673 |
| 33 | 1  | 0 | 1.614655  | -1.522566 | -2.190738 |
| 34 | 1  | 0 | 0.300501  | -0.440942 | -2.628978 |
| 35 | 7  | 0 | 1.168731  | 0.003330  | -0.748249 |
| 36 | 6  | 0 | 1.607171  | 1.316610  | -1.330581 |
| 37 | 1  | 0 | 2.640462  | 1.255265  | -1.685577 |
| 38 | 1  | 0 | 0.985021  | 1.536104  | -2.207298 |
| 39 | 6  | 0 | 2.284176  | -0.565784 | 0.163858  |
| 40 | 1  | 0 | 2.431472  | 0.189818  | 0.937661  |
| 41 | 1  | 0 | 1.859351  | -1.449623 | 0.641355  |
| 42 | 6  | 0 | 3.584392  | -0.895797 | -0.520641 |
| 43 | 6  | 0 | 4.616851  | 0.056703  | -0.586896 |
| 44 | 6  | 0 | 3.812258  | -2.179223 | -1.047856 |
| 45 | 6  | 0 | 5.831883  | -0.255151 | -1.196832 |
| 46 | 1  | 0 | 4.488400  | 1.033137  | -0.124245 |
| 47 | 6  | 0 | 5.026700  | -2.490310 | -1.659318 |
| 48 | 1  | 0 | 3.056489  | -2.955687 | -0.946442 |
| 49 | 6  | 0 | 6.034243  | -1.525801 | -1.741366 |
| 50 | 1  | 0 | 6.626243  | 0.483447  | -1.230563 |
| 51 | 1  | 0 | 5.195087  | -3.487468 | -2.052879 |
| 52 | 1  | 0 | 6.982833  | -1.771019 | -2.207983 |
| 53 | 6  | 0 | 1.428305  | 2.402608  | -0.290332 |

|    |   |   |           |          |           |
|----|---|---|-----------|----------|-----------|
| 54 | 6 | 0 | 2.171618  | 3.577695 | -0.269774 |
| 55 | 6 | 0 | 1.886055  | 4.544053 | 0.698404  |
| 56 | 1 | 0 | 2.960602  | 3.736223 | -0.997928 |
| 57 | 6 | 0 | 0.165202  | 3.108665 | 1.552179  |
| 58 | 6 | 0 | 0.864834  | 4.305938 | 1.622737  |
| 59 | 1 | 0 | 2.455726  | 5.467604 | 0.733736  |
| 60 | 1 | 0 | -0.628742 | 2.876714 | 2.255882  |
| 61 | 1 | 0 | 0.617523  | 5.032078 | 2.389331  |
| 62 | 7 | 0 | 0.437266  | 2.169460 | 0.614659  |
| 63 | 1 | 0 | -3.182869 | 1.377433 | -2.179419 |

-----

$1''_{\text{pt-B}}$  (triplet) E(B3LYP/ SDD-6-31G(d,p))= -1443.79916438 hartree

| Center<br>Number | Atomic<br>Number | Atomic<br>Type | Coordinates (Angstroms) |           |           |
|------------------|------------------|----------------|-------------------------|-----------|-----------|
|                  |                  |                | X                       | Y         | Z         |
| 1                | 7                | 0              | -1.130015               | -1.475796 | -0.422189 |
| 2                | 6                | 0              | -1.865038               | -1.432432 | -1.745472 |
| 3                | 1                | 0              | -1.216136               | -0.941478 | -2.476029 |
| 4                | 1                | 0              | -2.000168               | -2.463990 | -2.089513 |
| 5                | 6                | 0              | -1.993815               | -2.067076 | 0.662019  |
| 6                | 1                | 0              | -3.028017               | -2.116120 | 0.309891  |
| 7                | 1                | 0              | -1.690263               | -3.100163 | 0.860657  |
| 8                | 6                | 0              | 0.133996                | -2.303616 | -0.635375 |
| 9                | 1                | 0              | 0.487853                | -2.601287 | 0.355195  |
| 10               | 1                | 0              | -0.101443               | -3.222404 | -1.185746 |
| 11               | 26               | 0              | -0.248540               | 0.252600  | 0.281457  |
| 12               | 6                | 0              | -3.233009               | -0.779197 | -1.793529 |
| 13               | 6                | 0              | -4.396465               | -1.500622 | -2.031891 |
| 14               | 6                | 0              | -4.506810               | 1.253285  | -1.872963 |
| 15               | 6                | 0              | -5.623413               | -0.838682 | -2.191333 |
| 16               | 1                | 0              | -4.347170               | -2.581311 | -2.115712 |
| 17               | 6                | 0              | -5.680421               | 0.554315  | -2.108794 |
| 18               | 1                | 0              | -4.456110               | 2.334516  | -1.808707 |
| 19               | 1                | 0              | -6.524591               | -1.412501 | -2.388000 |
| 20               | 1                | 0              | -6.611779               | 1.095649  | -2.236041 |
| 21               | 6                | 0              | -1.964788               | -1.252977 | 1.942015  |
| 22               | 6                | 0              | -2.534016               | -1.755018 | 3.110073  |
| 23               | 6                | 0              | -2.526522               | -0.973365 | 4.265639  |
| 24               | 1                | 0              | -2.973836               | -2.747662 | 3.118870  |
| 25               | 6                | 0              | -1.376880               | 0.728095  | 3.033799  |
| 26               | 6                | 0              | -1.936630               | 0.292972  | 4.225235  |
| 27               | 1                | 0              | -2.964841               | -1.350257 | 5.184714  |

|    |   |   |           |           |           |
|----|---|---|-----------|-----------|-----------|
| 28 | 1 | 0 | -0.882139 | 1.689680  | 2.972529  |
| 29 | 1 | 0 | -1.898258 | 0.927188  | 5.104120  |
| 30 | 7 | 0 | -3.341513 | 0.578609  | -1.726470 |
| 31 | 7 | 0 | -1.394300 | -0.018671 | 1.900419  |
| 32 | 6 | 0 | 1.208537  | -1.493117 | -1.363177 |
| 33 | 1 | 0 | 2.122711  | -2.086973 | -1.462499 |
| 34 | 1 | 0 | 0.895078  | -1.228303 | -2.376185 |
| 35 | 7 | 0 | 1.470793  | -0.236053 | -0.593753 |
| 36 | 6 | 0 | 1.883432  | 0.929770  | -1.428398 |
| 37 | 1 | 0 | 2.954710  | 0.891818  | -1.649490 |
| 38 | 1 | 0 | 1.357526  | 0.880284  | -2.389360 |
| 39 | 6 | 0 | 2.494344  | -0.471754 | 0.556891  |
| 40 | 1 | 0 | 2.532776  | 0.468693  | 1.111787  |
| 41 | 1 | 0 | 2.046693  | -1.224030 | 1.212177  |
| 42 | 6 | 0 | 3.869789  | -0.898765 | 0.117310  |
| 43 | 6 | 0 | 4.867753  | 0.059438  | -0.133864 |
| 44 | 6 | 0 | 4.192963  | -2.262497 | 0.003930  |
| 45 | 6 | 0 | 6.146465  | -0.336735 | -0.525508 |
| 46 | 1 | 0 | 4.661421  | 1.116550  | 0.020041  |
| 47 | 6 | 0 | 5.471868  | -2.657515 | -0.388308 |
| 48 | 1 | 0 | 3.459738  | -3.023680 | 0.264015  |
| 49 | 6 | 0 | 6.446386  | -1.694538 | -0.662293 |
| 50 | 1 | 0 | 6.913431  | 0.409889  | -0.704204 |
| 51 | 1 | 0 | 5.714213  | -3.712782 | -0.460421 |
| 52 | 1 | 0 | 7.444038  | -2.002104 | -0.958562 |
| 53 | 6 | 0 | 1.502851  | 2.208775  | -0.714295 |
| 54 | 6 | 0 | 2.159477  | 3.415912  | -0.929315 |
| 55 | 6 | 0 | 1.705848  | 4.566135  | -0.279774 |
| 56 | 1 | 0 | 3.014285  | 3.456184  | -1.596787 |
| 57 | 6 | 0 | -0.006451 | 3.243037  | 0.748907  |
| 58 | 6 | 0 | 0.599942  | 4.478008  | 0.570192  |
| 59 | 1 | 0 | 2.208820  | 5.516069  | -0.433332 |
| 60 | 1 | 0 | -0.869763 | 3.133339  | 1.395442  |
| 61 | 1 | 0 | 0.216757  | 5.349178  | 1.090144  |
| 62 | 7 | 0 | 0.431767  | 2.120648  | 0.128018  |
| 63 | 1 | 0 | -2.496985 | 1.126239  | -1.579397 |

-----  
**1''<sub>pt-c</sub>** (quintet) E(B3LYP/ SDD-6-31G(d,p))= -1443.81644775 hartree  
 -----

| Center<br>Number | Atomic<br>Number | Atomic<br>Type | Coordinates (Angstroms) |          |           |
|------------------|------------------|----------------|-------------------------|----------|-----------|
|                  |                  |                | X                       | Y        | Z         |
| 1                | 7                | 0              | 1.275977                | 1.185505 | -1.053740 |

|    |    |   |           |           |           |
|----|----|---|-----------|-----------|-----------|
| 2  | 6  | 0 | 2.263911  | 0.601271  | -2.030754 |
| 3  | 1  | 0 | 1.714829  | -0.052898 | -2.715359 |
| 4  | 1  | 0 | 2.709869  | 1.389521  | -2.648877 |
| 5  | 6  | 0 | 1.916506  | 2.440902  | -0.517764 |
| 6  | 1  | 0 | 2.903521  | 2.157425  | -0.138275 |
| 7  | 1  | 0 | 2.090192  | 3.128227  | -1.356234 |
| 8  | 6  | 0 | -0.024065 | 1.477067  | -1.748391 |
| 9  | 1  | 0 | -0.582266 | 2.172967  | -1.121231 |
| 10 | 1  | 0 | 0.155906  | 1.976959  | -2.709218 |
| 11 | 26 | 0 | 0.899756  | -0.794107 | 0.134602  |
| 12 | 6  | 0 | 3.338890  | -0.214717 | -1.344194 |
| 13 | 6  | 0 | 4.656715  | -0.244085 | -1.785360 |
| 14 | 6  | 0 | 3.798996  | -1.826042 | 0.289957  |
| 15 | 6  | 0 | 5.564161  | -1.107908 | -1.162494 |
| 16 | 1  | 0 | 4.970717  | 0.385700  | -2.611681 |
| 17 | 6  | 0 | 5.127215  | -1.912476 | -0.108423 |
| 18 | 1  | 0 | 3.417923  | -2.438090 | 1.101038  |
| 19 | 1  | 0 | 6.595939  | -1.150899 | -1.498040 |
| 20 | 1  | 0 | 5.799757  | -2.597285 | 0.396479  |
| 21 | 6  | 0 | 1.187968  | 3.235355  | 0.549766  |
| 22 | 6  | 0 | 0.316073  | 4.283903  | 0.278235  |
| 23 | 6  | 0 | -0.220927 | 5.051639  | 1.321588  |
| 24 | 1  | 0 | 0.081771  | 4.528776  | -0.752147 |
| 25 | 6  | 0 | 1.009788  | 3.734222  | 2.894350  |
| 26 | 6  | 0 | 0.124972  | 4.771373  | 2.645889  |
| 27 | 1  | 0 | -0.889411 | 5.877375  | 1.095466  |
| 28 | 1  | 0 | 1.359470  | 3.466943  | 3.885565  |
| 29 | 1  | 0 | -0.260921 | 5.357816  | 3.472772  |
| 30 | 7  | 0 | 2.917603  | -0.993696 | -0.313649 |
| 31 | 7  | 0 | 1.499507  | 3.010188  | 1.859285  |
| 32 | 6  | 0 | -0.863150 | 0.215559  | -1.982395 |
| 33 | 1  | 0 | -1.830718 | 0.506759  | -2.406212 |
| 34 | 1  | 0 | -0.386364 | -0.443285 | -2.713798 |
| 35 | 7  | 0 | -1.042824 | -0.555402 | -0.718924 |
| 36 | 6  | 0 | -1.470768 | -1.966323 | -0.965074 |
| 37 | 1  | 0 | -2.543551 | -2.017529 | -1.175258 |
| 38 | 1  | 0 | -0.948790 | -2.334851 | -1.856056 |
| 39 | 6  | 0 | -2.001057 | 0.136848  | 0.264354  |
| 40 | 1  | 0 | -1.963176 | -0.454165 | 1.183388  |
| 41 | 1  | 0 | -1.561185 | 1.113472  | 0.488096  |
| 42 | 6  | 0 | -3.428410 | 0.288497  | -0.202063 |
| 43 | 6  | 0 | -4.389036 | -0.677273 | 0.142011  |
| 44 | 6  | 0 | -3.831977 | 1.405655  | -0.952954 |
| 45 | 6  | 0 | -5.712324 | -0.545003 | -0.280212 |



|    |   |   |           |           |           |
|----|---|---|-----------|-----------|-----------|
| 46 | 1 | 0 | -4.110971 | -1.520984 | 0.769867  |
| 47 | 6 | 0 | -5.154036 | 1.537416  | -1.377707 |
| 48 | 1 | 0 | -3.121152 | 2.196471  | -1.186046 |
| 49 | 6 | 0 | -6.094033 | 0.558090  | -1.047191 |
| 50 | 1 | 0 | -6.447329 | -1.292423 | 0.000519  |
| 51 | 1 | 0 | -5.455316 | 2.406924  | -1.952988 |
| 52 | 1 | 0 | -7.124239 | 0.663703  | -1.371438 |
| 53 | 6 | 0 | -1.113808 | -2.844146 | 0.220842  |
| 54 | 6 | 0 | -1.830114 | -3.994949 | 0.534047  |
| 55 | 6 | 0 | -1.419263 | -4.785023 | 1.610194  |
| 56 | 1 | 0 | -2.696792 | -4.271274 | -0.057890 |
| 57 | 6 | 0 | 0.363072  | -3.234622 | 1.999385  |
| 58 | 6 | 0 | -0.305775 | -4.395158 | 2.359528  |
| 59 | 1 | 0 | -1.965427 | -5.688009 | 1.865451  |
| 60 | 1 | 0 | 1.226092  | -2.890255 | 2.560990  |
| 61 | 1 | 0 | 0.035984  | -4.976445 | 3.208782  |
| 62 | 7 | 0 | -0.023865 | -2.473859 | 0.946097  |
| 63 | 1 | 0 | 2.190042  | 2.296574  | 2.078177  |

-----

**1''<sub>pt-c</sub>** (singlet) E(B3LYP/ SDD-6-31G(d,p))= -1443.76917273 hartree

| Center<br>Number | Atomic<br>Number | Atomic<br>Type | Coordinates (Angstroms) |           |           |
|------------------|------------------|----------------|-------------------------|-----------|-----------|
|                  |                  |                | X                       | Y         | Z         |
| 1                | 7                | 0              | 1.078714                | 1.408786  | -1.093248 |
| 2                | 6                | 0              | 2.155046                | 0.992401  | -2.077898 |
| 3                | 1                | 0              | 1.666822                | 0.546433  | -2.949241 |
| 4                | 1                | 0              | 2.695106                | 1.867073  | -2.452658 |
| 5                | 6                | 0              | 1.471428                | 2.793255  | -0.618817 |
| 6                | 1                | 0              | 2.499321                | 2.715109  | -0.250425 |
| 7                | 1                | 0              | 1.499786                | 3.460184  | -1.489582 |
| 8                | 6                | 0              | -0.245102               | 1.419645  | -1.817324 |
| 9                | 1                | 0              | -0.953652               | 1.993103  | -1.219367 |
| 10               | 1                | 0              | -0.152775               | 1.921529  | -2.788307 |
| 11               | 26               | 0              | 0.900064                | -0.234738 | 0.244364  |
| 12               | 6                | 0              | 3.102045                | -0.022034 | -1.502116 |
| 13               | 6                | 0              | 4.392929                | -0.196668 | -1.988487 |
| 14               | 6                | 0              | 3.333016                | -1.860572 | -0.077919 |
| 15               | 6                | 0              | 5.167583                | -1.250983 | -1.499533 |
| 16               | 1                | 0              | 4.783087                | 0.472755  | -2.748654 |
| 17               | 6                | 0              | 4.622579                | -2.098811 | -0.533051 |
| 18               | 1                | 0              | 2.879938                | -2.491940 | 0.674135  |
| 19               | 1                | 0              | 6.176042                | -1.408627 | -1.869530 |

|    |   |   |           |           |           |
|----|---|---|-----------|-----------|-----------|
| 20 | 1 | 0 | 5.186687  | -2.933594 | -0.131668 |
| 21 | 6 | 0 | 0.624694  | 3.486914  | 0.433727  |
| 22 | 6 | 0 | -0.499141 | 4.257026  | 0.154436  |
| 23 | 6 | 0 | -1.142829 | 4.973754  | 1.173837  |
| 24 | 1 | 0 | -0.852223 | 4.336793  | -0.867860 |
| 25 | 6 | 0 | 0.484334  | 4.173926  | 2.734295  |
| 26 | 6 | 0 | -0.650329 | 4.928205  | 2.480396  |
| 27 | 1 | 0 | -2.010578 | 5.583675  | 0.939408  |
| 28 | 1 | 0 | 0.958084  | 4.109019  | 3.707890  |
| 29 | 1 | 0 | -1.115787 | 5.486410  | 3.285689  |
| 30 | 7 | 0 | 2.576249  | -0.835386 | -0.548079 |
| 31 | 7 | 0 | 1.070287  | 3.486558  | 1.724664  |
| 32 | 6 | 0 | -0.756562 | -0.010055 | -2.000761 |
| 33 | 1 | 0 | -1.759189 | -0.000322 | -2.439523 |
| 34 | 1 | 0 | -0.112325 | -0.583683 | -2.671726 |
| 35 | 7 | 0 | -0.760476 | -0.691704 | -0.673566 |
| 36 | 6 | 0 | -0.768986 | -2.186603 | -0.749278 |
| 37 | 1 | 0 | -1.761315 | -2.560473 | -1.018757 |
| 38 | 1 | 0 | -0.070259 | -2.489394 | -1.536756 |
| 39 | 6 | 0 | -1.919555 | -0.190081 | 0.222960  |
| 40 | 1 | 0 | -1.795164 | -0.690156 | 1.185228  |
| 41 | 1 | 0 | -1.750420 | 0.880047  | 0.381315  |
| 42 | 6 | 0 | -3.310635 | -0.430708 | -0.313908 |
| 43 | 6 | 0 | -4.008106 | -1.597846 | 0.040235  |
| 44 | 6 | 0 | -3.945425 | 0.517975  | -1.133104 |
| 45 | 6 | 0 | -5.297737 | -1.824951 | -0.441160 |
| 46 | 1 | 0 | -3.558486 | -2.317933 | 0.720085  |
| 47 | 6 | 0 | -5.234258 | 0.289983  | -1.615140 |
| 48 | 1 | 0 | -3.448417 | 1.455148  | -1.376708 |
| 49 | 6 | 0 | -5.908534 | -0.885566 | -1.275146 |
| 50 | 1 | 0 | -5.831175 | -2.725234 | -0.153818 |
| 51 | 1 | 0 | -5.717872 | 1.031916  | -2.242263 |
| 52 | 1 | 0 | -6.913840 | -1.060244 | -1.644561 |
| 53 | 6 | 0 | -0.313503 | -2.716364 | 0.592770  |
| 54 | 6 | 0 | -0.690191 | -3.952968 | 1.105449  |
| 55 | 6 | 0 | -0.215245 | -4.341223 | 2.361244  |
| 56 | 1 | 0 | -1.345736 | -4.602022 | 0.533635  |
| 57 | 6 | 0 | 0.950931  | -2.250620 | 2.505424  |
| 58 | 6 | 0 | 0.610929  | -3.471055 | 3.076927  |
| 59 | 1 | 0 | -0.494757 | -5.303626 | 2.778678  |
| 60 | 1 | 0 | 1.597244  | -1.548678 | 3.024509  |
| 61 | 1 | 0 | 0.986796  | -3.730322 | 4.060590  |
| 62 | 7 | 0 | 0.509834  | -1.879899 | 1.281371  |
| 63 | 1 | 0 | 1.934895  | 2.995893  | 1.940431  |

-----  
**1''<sub>pt-c</sub>** (triplet) E(B3LYP/ SDD-6-31G(d,p))= -1443.80703370 hartree  
-----

| Center<br>Number | Atomic<br>Number | Atomic<br>Type | Coordinates (Angstroms) |           |           |
|------------------|------------------|----------------|-------------------------|-----------|-----------|
|                  |                  |                | X                       | Y         | Z         |
| 1                | 7                | 0              | 1.097442                | 1.213119  | -1.152437 |
| 2                | 6                | 0              | 2.154095                | 0.740436  | -2.126375 |
| 3                | 1                | 0              | 1.680667                | 0.043543  | -2.825150 |
| 4                | 1                | 0              | 2.531784                | 1.579086  | -2.722465 |
| 5                | 6                | 0              | 1.636678                | 2.493042  | -0.548616 |
| 6                | 1                | 0              | 2.642479                | 2.272373  | -0.179522 |
| 7                | 1                | 0              | 1.751482                | 3.220599  | -1.361045 |
| 8                | 6                | 0              | -0.221483               | 1.441445  | -1.854173 |
| 9                | 1                | 0              | -0.808456               | 2.120325  | -1.234548 |
| 10               | 1                | 0              | -0.062710               | 1.931367  | -2.822199 |
| 11               | 26               | 0              | 0.873470                | -0.538308 | -0.056442 |
| 12               | 6                | 0              | 3.268824                | 0.038144  | -1.384497 |
| 13               | 6                | 0              | 4.584976                | 0.039184  | -1.829723 |
| 14               | 6                | 0              | 3.809040                | -1.375950 | 0.391291  |
| 15               | 6                | 0              | 5.539054                | -0.704964 | -1.128603 |
| 16               | 1                | 0              | 4.862274                | 0.602889  | -2.714863 |
| 17               | 6                | 0              | 5.142226                | -1.421802 | 0.000888  |
| 18               | 1                | 0              | 3.467669                | -1.931390 | 1.254986  |
| 19               | 1                | 0              | 6.572515                | -0.722947 | -1.460938 |
| 20               | 1                | 0              | 5.849711                | -2.013405 | 0.571603  |
| 21               | 6                | 0              | 0.845184                | 3.178303  | 0.548628  |
| 22               | 6                | 0              | -0.055742               | 4.212154  | 0.321648  |
| 23               | 6                | 0              | -0.651362               | 4.886117  | 1.398531  |
| 24               | 1                | 0              | -0.269289               | 4.520530  | -0.696341 |
| 25               | 6                | 0              | 0.577860                | 3.501267  | 2.914363  |
| 26               | 6                | 0              | -0.335101               | 4.524561  | 2.710060  |
| 27               | 1                | 0              | -1.342716               | 5.702190  | 1.208737  |
| 28               | 1                | 0              | 0.904372                | 3.174969  | 3.895823  |
| 29               | 1                | 0              | -0.766545               | 5.037261  | 3.563131  |
| 30               | 7                | 0              | 2.879204                | -0.658729 | -0.279773 |
| 31               | 7                | 0              | 1.125478                | 2.870315  | 1.848689  |
| 32               | 6                | 0              | -0.973565               | 0.123726  | -2.034141 |
| 33               | 1                | 0              | -1.987538               | 0.315230  | -2.400712 |
| 34               | 1                | 0              | -0.479379               | -0.510976 | -2.774507 |
| 35               | 7                | 0              | -1.005839               | -0.623970 | -0.734692 |
| 36               | 6                | 0              | -1.266645               | -2.089958 | -0.931877 |
| 37               | 1                | 0              | -2.336512               | -2.282255 | -1.053417 |

|    |   |   |           |           |           |
|----|---|---|-----------|-----------|-----------|
| 38 | 1 | 0 | -0.769386 | -2.407027 | -1.855323 |
| 39 | 6 | 0 | -2.012660 | -0.023483 | 0.270348  |
| 40 | 1 | 0 | -1.876805 | -0.591144 | 1.194059  |
| 41 | 1 | 0 | -1.678462 | 1.000499  | 0.461437  |
| 42 | 6 | 0 | -3.457858 | -0.043464 | -0.159262 |
| 43 | 6 | 0 | -4.291982 | -1.109741 | 0.217546  |
| 44 | 6 | 0 | -4.006847 | 1.016410  | -0.901329 |
| 45 | 6 | 0 | -5.633275 | -1.130907 | -0.166095 |
| 46 | 1 | 0 | -3.902863 | -1.911694 | 0.841156  |
| 47 | 6 | 0 | -5.346980 | 0.994471  | -1.287163 |
| 48 | 1 | 0 | -3.397709 | 1.882137  | -1.155824 |
| 49 | 6 | 0 | -6.159484 | -0.083333 | -0.925549 |
| 50 | 1 | 0 | -6.270395 | -1.954679 | 0.139002  |
| 51 | 1 | 0 | -5.761851 | 1.820753  | -1.855344 |
| 52 | 1 | 0 | -7.204016 | -0.097355 | -1.219485 |
| 53 | 6 | 0 | -0.688182 | -2.841958 | 0.241497  |
| 54 | 6 | 0 | -1.182230 | -4.063966 | 0.684497  |
| 55 | 6 | 0 | -0.573754 | -4.691288 | 1.773732  |
| 56 | 1 | 0 | -2.032551 | -4.517032 | 0.185218  |
| 57 | 6 | 0 | 0.953522  | -2.849404 | 1.907386  |
| 58 | 6 | 0 | 0.503381  | -4.064140 | 2.404806  |
| 59 | 1 | 0 | -0.943553 | -5.646709 | 2.133058  |
| 60 | 1 | 0 | 1.776174  | -2.327010 | 2.382217  |
| 61 | 1 | 0 | 0.987629  | -4.506539 | 3.268367  |
| 62 | 7 | 0 | 0.386508  | -2.248877 | 0.834583  |
| 63 | 1 | 0 | 1.828062  | 2.160008  | 2.038881  |

-----  
Fe<sup>I</sup> HNP<sub>y</sub> 2''<sub>A</sub> (quartet) E(B3LYP/ SDD-6-31G(d,p))= -1444.19311388 hartree

| Center<br>Number | Atomic<br>Number | Atomic<br>Type | Coordinates (Angstroms) |           |           |
|------------------|------------------|----------------|-------------------------|-----------|-----------|
|                  |                  |                | X                       | Y         | Z         |
| 1                | 7                | 0              | -1.675901               | -1.253245 | -1.159373 |
| 2                | 6                | 0              | -2.577694               | -0.569496 | -2.109184 |
| 3                | 1                | 0              | -1.970187               | -0.126564 | -2.905596 |
| 4                | 1                | 0              | -3.254580               | -1.277480 | -2.606387 |
| 5                | 6                | 0              | -2.354249               | -2.365551 | -0.454759 |
| 6                | 1                | 0              | -3.393331               | -2.060311 | -0.279367 |
| 7                | 1                | 0              | -2.392431               | -3.276788 | -1.068208 |
| 8                | 6                | 0              | -0.393948               | -1.669498 | -1.768049 |
| 9                | 1                | 0              | 0.051258                | -2.424596 | -1.115632 |
| 10               | 1                | 0              | -0.545350               | -2.151669 | -2.745485 |
| 11               | 26               | 0              | -1.288408               | 0.172850  | 0.496581  |

|    |   |   |           |           |           |
|----|---|---|-----------|-----------|-----------|
| 12 | 6 | 0 | -3.383631 | 0.551914  | -1.472202 |
| 13 | 6 | 0 | -4.598146 | 0.955784  | -2.025456 |
| 14 | 6 | 0 | -3.514755 | 2.239092  | 0.128263  |
| 15 | 6 | 0 | -5.271475 | 2.050388  | -1.484355 |
| 16 | 1 | 0 | -5.007810 | 0.418933  | -2.875143 |
| 17 | 6 | 0 | -4.715066 | 2.709480  | -0.387824 |
| 18 | 1 | 0 | -3.065092 | 2.705848  | 0.998693  |
| 19 | 1 | 0 | -6.216006 | 2.377655  | -1.906976 |
| 20 | 1 | 0 | -5.205849 | 3.560533  | 0.070672  |
| 21 | 6 | 0 | -1.715680 | -2.661595 | 0.889174  |
| 22 | 6 | 0 | -1.718045 | -3.945614 | 1.429263  |
| 23 | 6 | 0 | -1.192752 | -4.154907 | 2.705014  |
| 24 | 1 | 0 | -2.130748 | -4.770535 | 0.857452  |
| 25 | 6 | 0 | -0.703064 | -1.813025 | 2.804959  |
| 26 | 6 | 0 | -0.676442 | -3.065758 | 3.406649  |
| 27 | 1 | 0 | -1.189338 | -5.148248 | 3.141933  |
| 28 | 1 | 0 | -0.320207 | -0.939950 | 3.323535  |
| 29 | 1 | 0 | -0.264302 | -3.178464 | 4.403148  |
| 30 | 7 | 0 | -2.848241 | 1.186104  | -0.398126 |
| 31 | 7 | 0 | -1.202500 | -1.602636 | 1.567355  |
| 32 | 6 | 0 | 0.556554  | -0.489808 | -1.949217 |
| 33 | 1 | 0 | 1.460160  | -0.832963 | -2.468569 |
| 34 | 1 | 0 | 0.088060  | 0.256184  | -2.597777 |
| 35 | 7 | 0 | 0.911611  | 0.200096  | -0.670098 |
| 36 | 6 | 0 | 1.513660  | 1.503675  | -1.041268 |
| 37 | 1 | 0 | 2.452290  | 1.368932  | -1.594133 |
| 38 | 1 | 0 | 0.815361  | 2.014254  | -1.716150 |
| 39 | 6 | 0 | 1.874865  | -0.626866 | 0.165068  |
| 40 | 1 | 0 | 2.019561  | -0.081095 | 1.102577  |
| 41 | 1 | 0 | 1.343581  | -1.543839 | 0.424347  |
| 42 | 6 | 0 | 3.221415  | -0.955862 | -0.447630 |
| 43 | 6 | 0 | 4.334410  | -0.131598 | -0.218017 |
| 44 | 6 | 0 | 3.397121  | -2.114040 | -1.221942 |
| 45 | 6 | 0 | 5.579414  | -0.437674 | -0.768959 |
| 46 | 1 | 0 | 4.237686  | 0.739897  | 0.425866  |
| 47 | 6 | 0 | 4.639923  | -2.422471 | -1.776107 |
| 48 | 1 | 0 | 2.565342  | -2.798129 | -1.372392 |
| 49 | 6 | 0 | 5.732096  | -1.580958 | -1.555568 |
| 50 | 1 | 0 | 6.432562  | 0.204026  | -0.571783 |
| 51 | 1 | 0 | 4.759373  | -3.325334 | -2.366582 |
| 52 | 1 | 0 | 6.701010  | -1.824497 | -1.979481 |
| 53 | 6 | 0 | 1.792359  | 2.454408  | 0.101560  |
| 54 | 6 | 0 | 2.836090  | 3.377434  | 0.086971  |
| 55 | 6 | 0 | 2.974169  | 4.286194  | 1.137458  |

|    |   |   |          |          |           |
|----|---|---|----------|----------|-----------|
| 56 | 1 | 0 | 3.531025 | 3.379420 | -0.745523 |
| 57 | 6 | 0 | 1.057210 | 3.326943 | 2.197815  |
| 58 | 6 | 0 | 2.074595 | 4.262822 | 2.210999  |
| 59 | 1 | 0 | 3.784276 | 5.008718 | 1.123874  |
| 60 | 1 | 0 | 0.319247 | 3.227531 | 2.985848  |
| 61 | 1 | 0 | 2.163961 | 4.953601 | 3.041367  |
| 62 | 7 | 0 | 0.949294 | 2.471841 | 1.156369  |
| 63 | 1 | 0 | 0.175648 | 1.755229 | 1.135951  |

-----

Fe<sup>I</sup> HNP<sub>y</sub> 2''<sub>A</sub> (doublet) E(B3LYP/ SDD-6-31G(d,p))= -1444.15940301 hartree

| Center<br>Number | Atomic<br>Number | Atomic<br>Type | Coordinates (Angstroms) |           |           |
|------------------|------------------|----------------|-------------------------|-----------|-----------|
|                  |                  |                | X                       | Y         | Z         |
| 1                | 7                | 0              | -1.608084               | -1.273240 | -1.200795 |
| 2                | 6                | 0              | -2.486860               | -0.613615 | -2.192801 |
| 3                | 1                | 0              | -1.854781               | -0.143428 | -2.953527 |
| 4                | 1                | 0              | -3.121226               | -1.336378 | -2.723756 |
| 5                | 6                | 0              | -2.334168               | -2.316153 | -0.437054 |
| 6                | 1                | 0              | -3.384469               | -2.008028 | -0.374944 |
| 7                | 1                | 0              | -2.320847               | -3.282975 | -0.958113 |
| 8                | 6                | 0              | -0.330230               | -1.760540 | -1.770453 |
| 9                | 1                | 0              | 0.074982                | -2.504000 | -1.079312 |
| 10               | 1                | 0              | -0.478690               | -2.272473 | -2.732504 |
| 11               | 26               | 0              | -1.083387               | 0.219508  | 0.248575  |
| 12               | 6                | 0              | -3.340056               | 0.464066  | -1.547689 |
| 13               | 6                | 0              | -4.586607               | 0.811115  | -2.064302 |
| 14               | 6                | 0              | -3.520325               | 2.097072  | 0.100157  |
| 15               | 6                | 0              | -5.308566               | 1.847344  | -1.471430 |
| 16               | 1                | 0              | -4.986461               | 0.274907  | -2.918914 |
| 17               | 6                | 0              | -4.764794               | 2.502861  | -0.366940 |
| 18               | 1                | 0              | -3.067613               | 2.569814  | 0.964984  |
| 19               | 1                | 0              | -6.281001               | 2.131330  | -1.860842 |
| 20               | 1                | 0              | -5.293996               | 3.307913  | 0.130353  |
| 21               | 6                | 0              | -1.817628               | -2.469428 | 0.981864  |
| 22               | 6                | 0              | -1.941416               | -3.674769 | 1.670380  |
| 23               | 6                | 0              | -1.554859               | -3.740091 | 3.009327  |
| 24               | 1                | 0              | -2.342857               | -4.547833 | 1.165980  |
| 25               | 6                | 0              | -0.940151               | -1.430783 | 2.869496  |
| 26               | 6                | 0              | -1.049493               | -2.593792 | 3.623000  |
| 27               | 1                | 0              | -1.648208               | -4.669071 | 3.562660  |
| 28               | 1                | 0              | -0.548263               | -0.517463 | 3.305086  |
| 29               | 1                | 0              | -0.742830               | -2.597169 | 4.662923  |

|    |   |   |           |           |           |
|----|---|---|-----------|-----------|-----------|
| 30 | 7 | 0 | -2.809236 | 1.101463  | -0.472562 |
| 31 | 7 | 0 | -1.308751 | -1.359447 | 1.572882  |
| 32 | 6 | 0 | 0.662616  | -0.616322 | -1.969152 |
| 33 | 1 | 0 | 1.587764  | -1.005408 | -2.409978 |
| 34 | 1 | 0 | 0.251259  | 0.102672  | -2.683564 |
| 35 | 7 | 0 | 0.956168  | 0.138778  | -0.701749 |
| 36 | 6 | 0 | 1.596314  | 1.422625  | -1.101369 |
| 37 | 1 | 0 | 2.558140  | 1.241287  | -1.595709 |
| 38 | 1 | 0 | 0.940811  | 1.904406  | -1.836973 |
| 39 | 6 | 0 | 1.870921  | -0.658268 | 0.224967  |
| 40 | 1 | 0 | 1.990140  | -0.052501 | 1.127917  |
| 41 | 1 | 0 | 1.306069  | -1.544711 | 0.517914  |
| 42 | 6 | 0 | 3.227779  | -1.056749 | -0.317191 |
| 43 | 6 | 0 | 4.352740  | -0.244353 | -0.104146 |
| 44 | 6 | 0 | 3.400559  | -2.271185 | -1.001088 |
| 45 | 6 | 0 | 5.607747  | -0.617499 | -0.586841 |
| 46 | 1 | 0 | 4.255668  | 0.670569  | 0.475676  |
| 47 | 6 | 0 | 4.653398  | -2.646593 | -1.486688 |
| 48 | 1 | 0 | 2.557689  | -2.945475 | -1.133549 |
| 49 | 6 | 0 | 5.758142  | -1.816548 | -1.286126 |
| 50 | 1 | 0 | 6.469824  | 0.016244  | -0.403531 |
| 51 | 1 | 0 | 4.770309  | -3.591696 | -2.007402 |
| 52 | 1 | 0 | 6.734604  | -2.111586 | -1.656607 |
| 53 | 6 | 0 | 1.832949  | 2.423835  | 0.009316  |
| 54 | 6 | 0 | 2.946810  | 3.259042  | 0.049838  |
| 55 | 6 | 0 | 3.053569  | 4.228339  | 1.049940  |
| 56 | 1 | 0 | 3.721113  | 3.148696  | -0.701340 |
| 57 | 6 | 0 | 0.960624  | 3.500681  | 1.948820  |
| 58 | 6 | 0 | 2.049230  | 4.352116  | 2.016742  |
| 59 | 1 | 0 | 3.919598  | 4.882235  | 1.078567  |
| 60 | 1 | 0 | 0.136525  | 3.518768  | 2.653321  |
| 61 | 1 | 0 | 2.109454  | 5.092120  | 2.806416  |
| 62 | 7 | 0 | 0.885927  | 2.585098  | 0.959508  |
| 63 | 1 | 0 | 0.053745  | 1.919022  | 0.911352  |

-----  
Fe<sup>I</sup> HNP<sub>y</sub> 2''<sub>A</sub> (sextet) E(B3LYP/ SDD-6-31G(d,p))= -1444.17595623 hartree

| Center<br>Number | Atomic<br>Number | Atomic<br>Type | Coordinates (Angstroms) |           |           |
|------------------|------------------|----------------|-------------------------|-----------|-----------|
|                  |                  |                | X                       | Y         | Z         |
| 1                | 7                | 0              | -1.658962               | -0.991486 | -1.139021 |
| 2                | 6                | 0              | -2.435726               | -0.314869 | -2.206475 |
| 3                | 1                | 0              | -1.742422               | 0.264242  | -2.825030 |

|    |    |   |           |           |           |
|----|----|---|-----------|-----------|-----------|
| 4  | 1  | 0 | -2.919234 | -1.042492 | -2.872621 |
| 5  | 6  | 0 | -2.490811 | -2.051571 | -0.502830 |
| 6  | 1  | 0 | -3.535305 | -1.722573 | -0.531611 |
| 7  | 1  | 0 | -2.438434 | -2.986005 | -1.075863 |
| 8  | 6  | 0 | -0.383783 | -1.571424 | -1.645279 |
| 9  | 1  | 0 | -0.050570 | -2.305965 | -0.908623 |
| 10 | 1  | 0 | -0.563005 | -2.121900 | -2.579824 |
| 11 | 26 | 0 | -1.241827 | 0.558888  | 0.450853  |
| 12 | 6  | 0 | -3.464489 | 0.628321  | -1.614432 |
| 13 | 6  | 0 | -4.627109 | 0.981381  | -2.296228 |
| 14 | 6  | 0 | -4.020872 | 2.024189  | 0.164476  |
| 15 | 6  | 0 | -5.503396 | 1.896530  | -1.711260 |
| 16 | 1  | 0 | -4.843200 | 0.547147  | -3.267149 |
| 17 | 6  | 0 | -5.196452 | 2.427391  | -0.457025 |
| 18 | 1  | 0 | -3.735192 | 2.408728  | 1.139313  |
| 19 | 1  | 0 | -6.414312 | 2.186629  | -2.225155 |
| 20 | 1  | 0 | -5.854155 | 3.136472  | 0.032940  |
| 21 | 6  | 0 | -2.120807 | -2.287513 | 0.945355  |
| 22 | 6  | 0 | -2.307001 | -3.521712 | 1.565389  |
| 23 | 6  | 0 | -2.051005 | -3.638297 | 2.932331  |
| 24 | 1  | 0 | -2.654853 | -4.373792 | 0.990266  |
| 25 | 6  | 0 | -1.433087 | -1.325361 | 2.949509  |
| 26 | 6  | 0 | -1.610889 | -2.518654 | 3.639998  |
| 27 | 1  | 0 | -2.193558 | -4.588915 | 3.436432  |
| 28 | 1  | 0 | -1.085215 | -0.426663 | 3.450272  |
| 29 | 1  | 0 | -1.405835 | -2.566823 | 4.703536  |
| 30 | 7  | 0 | -3.170998 | 1.142913  | -0.400322 |
| 31 | 7  | 0 | -1.679752 | -1.209706 | 1.629412  |
| 32 | 6  | 0 | 0.710865  | -0.536236 | -1.894167 |
| 33 | 1  | 0 | 1.547847  | -1.037554 | -2.398390 |
| 34 | 1  | 0 | 0.344111  | 0.224968  | -2.589394 |
| 35 | 7  | 0 | 1.172362  | 0.166886  | -0.667509 |
| 36 | 6  | 0 | 1.946806  | 1.353496  | -1.102192 |
| 37 | 1  | 0 | 2.843631  | 1.060285  | -1.663706 |
| 38 | 1  | 0 | 1.312220  | 1.926420  | -1.790645 |
| 39 | 6  | 0 | 1.972485  | -0.723858 | 0.253388  |
| 40 | 1  | 0 | 2.196636  | -0.125701 | 1.141705  |
| 41 | 1  | 0 | 1.297633  | -1.516874 | 0.585526  |
| 42 | 6  | 0 | 3.248814  | -1.324698 | -0.302617 |
| 43 | 6  | 0 | 4.483309  | -0.683827 | -0.115619 |
| 44 | 6  | 0 | 3.231241  | -2.550933 | -0.986599 |
| 45 | 6  | 0 | 5.661444  | -1.235065 | -0.621197 |
| 46 | 1  | 0 | 4.531180  | 0.236969  | 0.460855  |
| 47 | 6  | 0 | 4.406675  | -3.104297 | -1.495532 |



|    |   |   |          |           |           |
|----|---|---|----------|-----------|-----------|
| 48 | 1 | 0 | 2.297805 | -3.097424 | -1.100250 |
| 49 | 6 | 0 | 5.623870 | -2.443454 | -1.319316 |
| 50 | 1 | 0 | 6.609356 | -0.732151 | -0.456594 |
| 51 | 1 | 0 | 4.374887 | -4.056585 | -2.015489 |
| 52 | 1 | 0 | 6.539856 | -2.876878 | -1.707758 |
| 53 | 6 | 0 | 2.390218 | 2.313428  | -0.019614 |
| 54 | 6 | 0 | 3.614840 | 2.976522  | -0.064761 |
| 55 | 6 | 0 | 3.925669 | 3.936497  | 0.901181  |
| 56 | 1 | 0 | 4.317007 | 2.740051  | -0.856350 |
| 57 | 6 | 0 | 1.808355 | 3.546160  | 1.937802  |
| 58 | 6 | 0 | 3.012761 | 4.226565  | 1.920924  |
| 59 | 1 | 0 | 4.878437 | 4.455049  | 0.859950  |
| 60 | 1 | 0 | 1.035964 | 3.699197  | 2.683464  |
| 61 | 1 | 0 | 3.230450 | 4.962669  | 2.685991  |
| 62 | 7 | 0 | 1.539952 | 2.630282  | 0.983235  |
| 63 | 1 | 0 | 0.596017 | 2.153903  | 1.000199  |

-----  
Fe<sup>I</sup> HNP<sub>y</sub> 2''<sub>B</sub> (sextet) E(B3LYP/ SDD-6-31G(d,p))= -1444.20007881 hartree  
-----

| Center<br>Number | Atomic<br>Number | Atomic<br>Type | Coordinates (Angstroms) |           |           |
|------------------|------------------|----------------|-------------------------|-----------|-----------|
|                  |                  |                | X                       | Y         | Z         |
| 1                | 7                | 0              | -1.192095               | -1.521953 | -1.237800 |
| 2                | 6                | 0              | -2.093088               | -1.086095 | -2.360853 |
| 3                | 1                | 0              | -1.460586               | -0.600037 | -3.114619 |
| 4                | 1                | 0              | -2.565595               | -1.946788 | -2.848379 |
| 5                | 6                | 0              | -1.860850               | -2.540684 | -0.390016 |
| 6                | 1                | 0              | -2.942977               | -2.419226 | -0.510282 |
| 7                | 1                | 0              | -1.618906               | -3.557554 | -0.722357 |
| 8                | 6                | 0              | 0.148073                | -1.974982 | -1.710303 |
| 9                | 1                | 0              | 0.567349                | -2.625938 | -0.939171 |
| 10               | 1                | 0              | 0.058240                | -2.581497 | -2.621337 |
| 11               | 26               | 0              | -0.821693               | 0.297692  | 0.027093  |
| 12               | 6                | 0              | -3.122643               | -0.138217 | -1.834518 |
| 13               | 6                | 0              | -4.467438               | -0.373609 | -1.741251 |
| 14               | 6                | 0              | -3.464796               | 1.990760  | -0.637201 |
| 15               | 6                | 0              | -5.346045               | 0.541349  | -1.116823 |
| 16               | 1                | 0              | -4.857490               | -1.296636 | -2.161471 |
| 17               | 6                | 0              | -4.796716               | 1.723539  | -0.556191 |
| 18               | 1                | 0              | -3.009565               | 2.904701  | -0.276139 |
| 19               | 1                | 0              | -6.410072               | 0.346640  | -1.074362 |
| 20               | 1                | 0              | -5.439918               | 2.446690  | -0.065321 |
| 21               | 6                | 0              | -1.554283               | -2.376913 | 1.085732  |
| 22               | 6                | 0              | -1.662652               | -3.446705 | 1.973070  |

|    |   |   |           |           |           |
|----|---|---|-----------|-----------|-----------|
| 23 | 6 | 0 | -1.476634 | -3.225038 | 3.337246  |
| 24 | 1 | 0 | -1.895710 | -4.438462 | 1.599033  |
| 25 | 6 | 0 | -1.073101 | -0.919628 | 2.842867  |
| 26 | 6 | 0 | -1.180122 | -1.934990 | 3.782848  |
| 27 | 1 | 0 | -1.560558 | -4.046444 | 4.041827  |
| 28 | 1 | 0 | -0.830162 | 0.095492  | 3.141005  |
| 29 | 1 | 0 | -1.029797 | -1.719604 | 4.834656  |
| 30 | 7 | 0 | -2.542452 | 1.067659  | -1.262869 |
| 31 | 7 | 0 | -1.254097 | -1.129510 | 1.519147  |
| 32 | 6 | 0 | 1.088513  | -0.796265 | -1.975094 |
| 33 | 1 | 0 | 2.068420  | -1.168419 | -2.293813 |
| 34 | 1 | 0 | 0.701650  | -0.184805 | -2.795722 |
| 35 | 7 | 0 | 1.210871  | 0.081435  | -0.774988 |
| 36 | 6 | 0 | 1.652469  | 1.457989  | -1.121187 |
| 37 | 1 | 0 | 2.735065  | 1.504956  | -1.278428 |
| 38 | 1 | 0 | 1.183109  | 1.738891  | -2.071818 |
| 39 | 6 | 0 | 2.105360  | -0.520223 | 0.306506  |
| 40 | 1 | 0 | 2.021331  | 0.145348  | 1.170428  |
| 41 | 1 | 0 | 1.652354  | -1.472474 | 0.591687  |
| 42 | 6 | 0 | 3.558742  | -0.715770 | -0.059538 |
| 43 | 6 | 0 | 4.504441  | 0.283175  | 0.223182  |
| 44 | 6 | 0 | 3.998177  | -1.911246 | -0.650803 |
| 45 | 6 | 0 | 5.848697  | 0.105118  | -0.105494 |
| 46 | 1 | 0 | 4.194779  | 1.193432  | 0.732220  |
| 47 | 6 | 0 | 5.341905  | -2.090654 | -0.980597 |
| 48 | 1 | 0 | 3.295371  | -2.722162 | -0.829063 |
| 49 | 6 | 0 | 6.267588  | -1.079521 | -0.714554 |
| 50 | 1 | 0 | 6.570226  | 0.881898  | 0.127107  |
| 51 | 1 | 0 | 5.668400  | -3.022872 | -1.430405 |
| 52 | 1 | 0 | 7.314097  | -1.221644 | -0.964323 |
| 53 | 6 | 0 | 1.222947  | 2.449312  | -0.055245 |
| 54 | 6 | 0 | 1.935797  | 3.619842  | 0.198009  |
| 55 | 6 | 0 | 1.452605  | 4.520781  | 1.147202  |
| 56 | 1 | 0 | 2.854160  | 3.821487  | -0.343765 |
| 57 | 6 | 0 | -0.384845 | 3.034875  | 1.530088  |
| 58 | 6 | 0 | 0.269703  | 4.223312  | 1.827250  |
| 59 | 1 | 0 | 1.993400  | 5.438221  | 1.356864  |
| 60 | 1 | 0 | -1.306370 | 2.762511  | 2.036613  |
| 61 | 1 | 0 | -0.136784 | 4.894334  | 2.575601  |
| 62 | 7 | 0 | 0.076380  | 2.162947  | 0.606335  |
| 63 | 1 | 0 | -2.010529 | 1.568863  | -1.985478 |

-----  
Fe<sup>I</sup> HNP<sub>y</sub> 2''<sub>B</sub> (doublet) E(B3LYP/ SDD-6-31G(d,p))= -1444.17535337 hartree

| Center<br>Number | Atomic<br>Number | Atomic<br>Type | Coordinates (Angstroms) |           |           |
|------------------|------------------|----------------|-------------------------|-----------|-----------|
|                  |                  |                | X                       | Y         | Z         |
| 1                | 7                | 0              | -1.294307               | -1.306499 | -0.995456 |
| 2                | 6                | 0              | -2.071931               | -0.902175 | -2.200938 |
| 3                | 1                | 0              | -1.398711               | -0.364681 | -2.875606 |
| 4                | 1                | 0              | -2.425786               | -1.786539 | -2.747367 |
| 5                | 6                | 0              | -2.104406               | -2.261980 | -0.183990 |
| 6                | 1                | 0              | -3.161572               | -2.001572 | -0.312495 |
| 7                | 1                | 0              | -1.991655               | -3.287981 | -0.556791 |
| 8                | 6                | 0              | -0.003751               | -1.931916 | -1.451377 |
| 9                | 1                | 0              | 0.371665                | -2.533433 | -0.619791 |
| 10               | 1                | 0              | -0.183245               | -2.618841 | -2.290571 |
| 11               | 26               | 0              | -0.497993               | 0.218676  | 0.352112  |
| 12               | 6                | 0              | -3.260326               | -0.006877 | -1.926859 |
| 13               | 6                | 0              | -4.494888               | -0.145887 | -2.552400 |
| 14               | 6                | 0              | -4.039789               | 1.935796  | -0.797595 |
| 15               | 6                | 0              | -5.507824               | 0.783963  | -2.296260 |
| 16               | 1                | 0              | -4.659715               | -0.970210 | -3.237949 |
| 17               | 6                | 0              | -5.280104               | 1.840156  | -1.408412 |
| 18               | 1                | 0              | -3.776010               | 2.715334  | -0.091388 |
| 19               | 1                | 0              | -6.471796               | 0.681028  | -2.784597 |
| 20               | 1                | 0              | -6.047873               | 2.574105  | -1.191979 |
| 21               | 6                | 0              | -1.797462               | -2.193413 | 1.297505  |
| 22               | 6                | 0              | -2.061153               | -3.272839 | 2.138305  |
| 23               | 6                | 0              | -1.863944               | -3.129383 | 3.512006  |
| 24               | 1                | 0              | -2.420052               | -4.209976 | 1.724756  |
| 25               | 6                | 0              | -1.131195               | -0.887618 | 3.100335  |
| 26               | 6                | 0              | -1.396407               | -1.910052 | 4.003381  |
| 27               | 1                | 0              | -2.067141               | -3.956416 | 4.184730  |
| 28               | 1                | 0              | -0.735943               | 0.065560  | 3.434779  |
| 29               | 1                | 0              | -1.226318               | -1.754943 | 5.062860  |
| 30               | 7                | 0              | -3.082564               | 1.029810  | -1.078168 |
| 31               | 7                | 0              | -1.327464               | -1.014705 | 1.769576  |
| 32               | 6                | 0              | 1.031671                | -0.872877 | -1.843967 |
| 33               | 1                | 0              | 1.941307                | -1.364304 | -2.206630 |
| 34               | 1                | 0              | 0.663531                | -0.259031 | -2.671220 |
| 35               | 7                | 0              | 1.307599                | 0.015407  | -0.685815 |
| 36               | 6                | 0              | 1.661443                | 1.411560  | -1.048580 |
| 37               | 1                | 0              | 2.706101                | 1.506232  | -1.364790 |
| 38               | 1                | 0              | 1.040246                | 1.709045  | -1.902003 |
| 39               | 6                | 0              | 2.340822                | -0.584202 | 0.260662  |
| 40               | 1                | 0              | 2.367078                | 0.069429  | 1.135619  |

|    |   |   |           |           |           |
|----|---|---|-----------|-----------|-----------|
| 41 | 1 | 0 | 1.936498  | -1.543040 | 0.595352  |
| 42 | 6 | 0 | 3.732770  | -0.769960 | -0.302007 |
| 43 | 6 | 0 | 4.690789  | 0.251143  | -0.194099 |
| 44 | 6 | 0 | 4.106210  | -1.978623 | -0.911219 |
| 45 | 6 | 0 | 5.974717  | 0.082464  | -0.713372 |
| 46 | 1 | 0 | 4.442532  | 1.172927  | 0.327179  |
| 47 | 6 | 0 | 5.389729  | -2.149628 | -1.431295 |
| 48 | 1 | 0 | 3.401445  | -2.806465 | -0.952663 |
| 49 | 6 | 0 | 6.323386  | -1.115618 | -1.340215 |
| 50 | 1 | 0 | 6.706751  | 0.877959  | -0.615270 |
| 51 | 1 | 0 | 5.665094  | -3.092777 | -1.892605 |
| 52 | 1 | 0 | 7.324076  | -1.249916 | -1.738302 |
| 53 | 6 | 0 | 1.366784  | 2.336165  | 0.119401  |
| 54 | 6 | 0 | 2.076958  | 3.517019  | 0.324989  |
| 55 | 6 | 0 | 1.731545  | 4.346812  | 1.391776  |
| 56 | 1 | 0 | 2.891702  | 3.778866  | -0.342288 |
| 57 | 6 | 0 | 0.019200  | 2.774959  | 1.967853  |
| 58 | 6 | 0 | 0.682823  | 3.966848  | 2.230604  |
| 59 | 1 | 0 | 2.275258  | 5.269239  | 1.568698  |
| 60 | 1 | 0 | -0.801105 | 2.442384  | 2.596282  |
| 61 | 1 | 0 | 0.385483  | 4.577226  | 3.075982  |
| 62 | 7 | 0 | 0.344751  | 1.966116  | 0.935874  |
| 63 | 1 | 0 | -2.134113 | 1.041288  | -0.554314 |

-----  
Fe<sup>I</sup> HNP<sub>y</sub> 2''<sub>B</sub>(quartet) E(B3LYP/ SDD-6-31G(d,p))= -1444.20445641 hartree

| Center<br>Number | Atomic<br>Number | Atomic<br>Type | Coordinates (Angstroms) |           |           |
|------------------|------------------|----------------|-------------------------|-----------|-----------|
|                  |                  |                | X                       | Y         | Z         |
| 1                | 7                | 0              | -1.394701               | -1.083343 | -1.125190 |
| 2                | 6                | 0              | -2.095909               | -0.457479 | -2.270350 |
| 3                | 1                | 0              | -1.377174               | 0.163930  | -2.814052 |
| 4                | 1                | 0              | -2.452690               | -1.217437 | -2.979947 |
| 5                | 6                | 0              | -2.254508               | -2.137189 | -0.527094 |
| 6                | 1                | 0              | -3.281373               | -1.753084 | -0.494040 |
| 7                | 1                | 0              | -2.278214               | -3.034330 | -1.162182 |
| 8                | 6                | 0              | -0.091687               | -1.669857 | -1.595071 |
| 9                | 1                | 0              | 0.230701                | -2.383971 | -0.832269 |
| 10               | 1                | 0              | -0.248582               | -2.243206 | -2.520418 |
| 11               | 26               | 0              | -0.515759               | 0.136263  | 0.617981  |
| 12               | 6                | 0              | -3.270244               | 0.421887  | -1.895526 |
| 13               | 6                | 0              | -4.470216               | 0.438434  | -2.598842 |
| 14               | 6                | 0              | -4.071171               | 2.171819  | -0.489637 |
| 15               | 6                | 0              | -5.473603               | 1.344483  | -2.241919 |

|    |   |   |           |           |           |
|----|---|---|-----------|-----------|-----------|
| 16 | 1 | 0 | -4.614551 | -0.250089 | -3.424387 |
| 17 | 6 | 0 | -5.273489 | 2.225436  | -1.174105 |
| 18 | 1 | 0 | -3.829827 | 2.808059  | 0.354316  |
| 19 | 1 | 0 | -6.408897 | 1.359385  | -2.792706 |
| 20 | 1 | 0 | -6.033971 | 2.937888  | -0.875996 |
| 21 | 6 | 0 | -1.851826 | -2.511145 | 0.886049  |
| 22 | 6 | 0 | -2.195218 | -3.754090 | 1.416758  |
| 23 | 6 | 0 | -1.894271 | -4.032059 | 2.749478  |
| 24 | 1 | 0 | -2.695161 | -4.490924 | 0.796070  |
| 25 | 6 | 0 | -0.919344 | -1.851471 | 2.908963  |
| 26 | 6 | 0 | -1.247598 | -3.058787 | 3.512725  |
| 27 | 1 | 0 | -2.156540 | -4.992035 | 3.182595  |
| 28 | 1 | 0 | -0.400662 | -1.073835 | 3.460087  |
| 29 | 1 | 0 | -0.993070 | -3.231305 | 4.552407  |
| 30 | 7 | 0 | -3.120179 | 1.292434  | -0.869631 |
| 31 | 7 | 0 | -1.212928 | -1.571798 | 1.618952  |
| 32 | 6 | 0 | 1.005489  | -0.621955 | -1.818419 |
| 33 | 1 | 0 | 1.879001  | -1.116058 | -2.258092 |
| 34 | 1 | 0 | 0.680197  | 0.116514  | -2.556130 |
| 35 | 7 | 0 | 1.355781  | 0.088351  | -0.561040 |
| 36 | 6 | 0 | 1.644368  | 1.531239  | -0.762517 |
| 37 | 1 | 0 | 2.674665  | 1.705732  | -1.090851 |
| 38 | 1 | 0 | 0.988734  | 1.894681  | -1.562888 |
| 39 | 6 | 0 | 2.451391  | -0.608411 | 0.221383  |
| 40 | 1 | 0 | 2.520347  | -0.083528 | 1.179273  |
| 41 | 1 | 0 | 2.083287  | -1.615923 | 0.438087  |
| 42 | 6 | 0 | 3.812853  | -0.681032 | -0.434450 |
| 43 | 6 | 0 | 4.759533  | 0.336526  | -0.234226 |
| 44 | 6 | 0 | 4.169104  | -1.780843 | -1.231098 |
| 45 | 6 | 0 | 6.013705  | 0.274443  | -0.842499 |
| 46 | 1 | 0 | 4.527849  | 1.167679  | 0.428142  |
| 47 | 6 | 0 | 5.422546  | -1.844945 | -1.841212 |
| 48 | 1 | 0 | 3.476404  | -2.611138 | -1.351390 |
| 49 | 6 | 0 | 6.343903  | -0.812961 | -1.653914 |
| 50 | 1 | 0 | 6.737956  | 1.064669  | -0.671026 |
| 51 | 1 | 0 | 5.685316  | -2.705892 | -2.447798 |
| 52 | 1 | 0 | 7.321839  | -0.865267 | -2.121687 |
| 53 | 6 | 0 | 1.342351  | 2.333010  | 0.488317  |
| 54 | 6 | 0 | 2.142243  | 3.397638  | 0.895116  |
| 55 | 6 | 0 | 1.792571  | 4.124940  | 2.034178  |
| 56 | 1 | 0 | 3.032028  | 3.649274  | 0.327348  |
| 57 | 6 | 0 | -0.113774 | 2.694795  | 2.271776  |
| 58 | 6 | 0 | 0.644960  | 3.762324  | 2.738602  |
| 59 | 1 | 0 | 2.408351  | 4.954100  | 2.367474  |

|    |   |   |           |          |           |
|----|---|---|-----------|----------|-----------|
| 60 | 1 | 0 | -1.018854 | 2.386243 | 2.784932  |
| 61 | 1 | 0 | 0.338117  | 4.293268 | 3.632811  |
| 62 | 7 | 0 | 0.216131  | 1.988258 | 1.167308  |
| 63 | 1 | 0 | -2.227181 | 1.217941 | -0.302771 |

-----

Fe<sup>I</sup> HNPY 2<sup>''</sup>c (sextet) E(B3LYP/ SDD-6-31G(d,p))= -1444.20184961 hartree

| Center<br>Number | Atomic<br>Number | Atomic<br>Type | Coordinates (Angstroms) |           |           |
|------------------|------------------|----------------|-------------------------|-----------|-----------|
|                  |                  |                | X                       | Y         | Z         |
| 1                | 7                | 0              | -1.233038               | -1.752625 | -0.929381 |
| 2                | 6                | 0              | -2.290849               | -1.546319 | -1.944456 |
| 3                | 1                | 0              | -1.826559               | -1.137185 | -2.848953 |
| 4                | 1                | 0              | -2.757135               | -2.495547 | -2.238529 |
| 5                | 6                | 0              | -1.646069               | -2.769246 | 0.100079  |
| 6                | 1                | 0              | -2.733888               | -2.672594 | 0.221669  |
| 7                | 1                | 0              | -1.450832               | -3.789193 | -0.250545 |
| 8                | 6                | 0              | 0.086397                | -2.075857 | -1.541749 |
| 9                | 1                | 0              | 0.669853                | -2.617299 | -0.794634 |
| 10               | 1                | 0              | -0.031308               | -2.746506 | -2.402772 |
| 11               | 26               | 0              | -0.964159               | 0.190479  | 0.171605  |
| 12               | 6                | 0              | -3.345297               | -0.562252 | -1.475676 |
| 13               | 6                | 0              | -4.647312               | -0.592920 | -1.972567 |
| 14               | 6                | 0              | -3.824276               | 1.351386  | -0.230446 |
| 15               | 6                | 0              | -5.551671               | 0.393886  | -1.580730 |
| 16               | 1                | 0              | -4.945154               | -1.376277 | -2.662044 |
| 17               | 6                | 0              | -5.131190               | 1.389624  | -0.696015 |
| 18               | 1                | 0              | -3.454331               | 2.105116  | 0.457727  |
| 19               | 1                | 0              | -6.568764               | 0.386167  | -1.959719 |
| 20               | 1                | 0              | -5.801323               | 2.177101  | -0.370165 |
| 21               | 6                | 0              | -0.946650               | -2.506192 | 1.393527  |
| 22               | 6                | 0              | -0.014328               | -3.312509 | 1.989578  |
| 23               | 6                | 0              | 0.650741                | -2.934778 | 3.177828  |
| 24               | 1                | 0              | 0.209231                | -4.268410 | 1.523979  |
| 25               | 6                | 0              | -0.583177               | -0.849239 | 3.183225  |
| 26               | 6                | 0              | 0.340463                | -1.672313 | 3.748964  |
| 27               | 1                | 0              | 1.366923                | -3.597308 | 3.647051  |
| 28               | 1                | 0              | -0.885593               | 0.098687  | 3.610867  |
| 29               | 1                | 0              | 0.827770                | -1.350200 | 4.663472  |
| 30               | 7                | 0              | -2.943658               | 0.395409  | -0.605048 |
| 31               | 7                | 0              | -1.263803               | -1.201646 | 1.956663  |
| 32               | 6                | 0              | 0.825886                | -0.807535 | -1.974197 |
| 33               | 1                | 0              | 1.800338                | -1.069735 | -2.400495 |

|    |   |   |           |           |           |
|----|---|---|-----------|-----------|-----------|
| 34 | 1 | 0 | 0.263415  | -0.293402 | -2.759849 |
| 35 | 7 | 0 | 0.976005  | 0.141288  | -0.832845 |
| 36 | 6 | 0 | 1.199146  | 1.539871  | -1.286918 |
| 37 | 1 | 0 | 2.237387  | 1.699561  | -1.595911 |
| 38 | 1 | 0 | 0.571772  | 1.717308  | -2.168736 |
| 39 | 6 | 0 | 2.055162  | -0.290283 | 0.157797  |
| 40 | 1 | 0 | 1.999187  | 0.417275  | 0.989293  |
| 41 | 1 | 0 | 1.750909  | -1.264299 | 0.547660  |
| 42 | 6 | 0 | 3.466458  | -0.351738 | -0.380012 |
| 43 | 6 | 0 | 4.318166  | 0.759827  | -0.275326 |
| 44 | 6 | 0 | 3.965205  | -1.529465 | -0.959852 |
| 45 | 6 | 0 | 5.623463  | 0.706219  | -0.765442 |
| 46 | 1 | 0 | 3.970397  | 1.663568  | 0.220429  |
| 47 | 6 | 0 | 5.269736  | -1.584595 | -1.451267 |
| 48 | 1 | 0 | 3.343452  | -2.420970 | -1.004026 |
| 49 | 6 | 0 | 6.098372  | -0.464216 | -1.360555 |
| 50 | 1 | 0 | 6.273395  | 1.570243  | -0.669730 |
| 51 | 1 | 0 | 5.643686  | -2.503861 | -1.890755 |
| 52 | 1 | 0 | 7.115560  | -0.508989 | -1.736202 |
| 53 | 6 | 0 | 0.806247  | 2.526645  | -0.203074 |
| 54 | 6 | 0 | 1.410498  | 3.777257  | -0.087367 |
| 55 | 6 | 0 | 0.968184  | 4.660062  | 0.897675  |
| 56 | 1 | 0 | 2.214584  | 4.052789  | -0.761924 |
| 57 | 6 | 0 | -0.611750 | 2.998779  | 1.584669  |
| 58 | 6 | 0 | -0.062165 | 4.262958  | 1.752514  |
| 59 | 1 | 0 | 1.425233  | 5.638961  | 1.002189  |
| 60 | 1 | 0 | -1.407221 | 2.647996  | 2.235911  |
| 61 | 1 | 0 | -0.428981 | 4.914653  | 2.537510  |
| 62 | 7 | 0 | -0.195718 | 2.145355  | 0.624179  |
| 63 | 1 | 0 | -2.278732 | -1.126923 | 2.099285  |

-----  
Fe<sup>I</sup> HNP<sub>y</sub> 2''<sub>c</sub> (doublet) E(B3LYP/ SDD-6-31G(d,p))= -1444.18367237 hartree

| Center<br>Number | Atomic<br>Number | Atomic<br>Type | Coordinates (Angstroms) |          |           |
|------------------|------------------|----------------|-------------------------|----------|-----------|
|                  |                  |                | X                       | Y        | Z         |
| 1                | 7                | 0              | 1.206557                | 1.236748 | -1.209771 |
| 2                | 6                | 0              | 2.177356                | 0.675179 | -2.202811 |
| 3                | 1                | 0              | 1.626679                | 0.010281 | -2.874651 |
| 4                | 1                | 0              | 2.617798                | 1.466451 | -2.824006 |
| 5                | 6                | 0              | 1.835804                | 2.448973 | -0.607502 |
| 6                | 1                | 0              | 2.879001                | 2.198283 | -0.384697 |
| 7                | 1                | 0              | 1.852873                | 3.273366 | -1.331819 |

|    |    |   |           |           |           |
|----|----|---|-----------|-----------|-----------|
| 8  | 6  | 0 | -0.103841 | 1.584388  | -1.850590 |
| 9  | 1  | 0 | -0.604455 | 2.303128  | -1.196212 |
| 10 | 1  | 0 | 0.051171  | 2.084927  | -2.815697 |
| 11 | 26 | 0 | 0.840615  | -0.495918 | -0.050796 |
| 12 | 6  | 0 | 3.247148  | -0.116259 | -1.483849 |
| 13 | 6  | 0 | 4.556545  | -0.201310 | -1.946091 |
| 14 | 6  | 0 | 3.717285  | -1.543924 | 0.287698  |
| 15 | 6  | 0 | 5.471488  | -0.995036 | -1.250892 |
| 16 | 1  | 0 | 4.855487  | 0.341356  | -2.837037 |
| 17 | 6  | 0 | 5.043256  | -1.675366 | -0.112124 |
| 18 | 1  | 0 | 3.345895  | -2.071879 | 1.157499  |
| 19 | 1  | 0 | 6.498049  | -1.077666 | -1.592963 |
| 20 | 1  | 0 | 5.718604  | -2.303093 | 0.458304  |
| 21 | 6  | 0 | 1.203985  | 2.946898  | 0.672614  |
| 22 | 6  | 0 | 1.016370  | 4.293831  | 0.965526  |
| 23 | 6  | 0 | 0.519969  | 4.666247  | 2.218883  |
| 24 | 1  | 0 | 1.264826  | 5.044457  | 0.222972  |
| 25 | 6  | 0 | 0.398044  | 2.355957  | 2.831060  |
| 26 | 6  | 0 | 0.207498  | 3.686891  | 3.166974  |
| 27 | 1  | 0 | 0.375296  | 5.716421  | 2.452407  |
| 28 | 1  | 0 | 0.176138  | 1.530151  | 3.498187  |
| 29 | 1  | 0 | -0.177859 | 3.948164  | 4.145893  |
| 30 | 7  | 0 | 2.826276  | -0.779663 | -0.376167 |
| 31 | 7  | 0 | 0.889611  | 2.032870  | 1.618248  |
| 32 | 6  | 0 | -0.982465 | 0.345844  | -2.035789 |
| 33 | 1  | 0 | -1.963430 | 0.644083  | -2.423126 |
| 34 | 1  | 0 | -0.539695 | -0.324314 | -2.777182 |
| 35 | 7  | 0 | -1.097259 | -0.409760 | -0.755729 |
| 36 | 6  | 0 | -1.417325 | -1.853653 | -0.971439 |
| 37 | 1  | 0 | -2.485463 | -2.012146 | -1.151293 |
| 38 | 1  | 0 | -0.883112 | -2.185157 | -1.868354 |
| 39 | 6  | 0 | -2.080225 | 0.225476  | 0.217235  |
| 40 | 1  | 0 | -1.998518 | -0.352099 | 1.141875  |
| 41 | 1  | 0 | -1.705123 | 1.230148  | 0.429271  |
| 42 | 6  | 0 | -3.523449 | 0.297560  | -0.230406 |
| 43 | 6  | 0 | -4.421921 | -0.732786 | 0.089239  |
| 44 | 6  | 0 | -4.001730 | 1.410227  | -0.940760 |
| 45 | 6  | 0 | -5.754584 | -0.668176 | -0.319092 |
| 46 | 1  | 0 | -4.084885 | -1.578878 | 0.683777  |
| 47 | 6  | 0 | -5.333600 | 1.476507  | -1.351114 |
| 48 | 1  | 0 | -3.338404 | 2.246080  | -1.154084 |
| 49 | 6  | 0 | -6.210155 | 0.433139  | -1.046583 |
| 50 | 1  | 0 | -6.439295 | -1.469233 | -0.059088 |
| 51 | 1  | 0 | -5.689832 | 2.345173  | -1.895788 |



|    |   |   |           |           |           |
|----|---|---|-----------|-----------|-----------|
| 52 | 1 | 0 | -7.247720 | 0.485976  | -1.360415 |
| 53 | 6 | 0 | -0.932580 | -2.652762 | 0.217047  |
| 54 | 6 | 0 | -1.569574 | -3.807309 | 0.662609  |
| 55 | 6 | 0 | -1.041538 | -4.500868 | 1.752716  |
| 56 | 1 | 0 | -2.465550 | -4.157082 | 0.160177  |
| 57 | 6 | 0 | 0.681404  | -2.839937 | 1.878143  |
| 58 | 6 | 0 | 0.101302  | -4.000810 | 2.376746  |
| 59 | 1 | 0 | -1.519373 | -5.405882 | 2.113444  |
| 60 | 1 | 0 | 1.562783  | -2.414899 | 2.346767  |
| 61 | 1 | 0 | 0.538240  | -4.496634 | 3.236332  |
| 62 | 7 | 0 | 0.194769  | -2.176384 | 0.807890  |
| 63 | 1 | 0 | 0.957392  | 0.994204  | 1.304224  |

-----  
Fe<sup>I</sup> HNP<sub>y</sub> 2''<sub>c</sub>(quartet) E(B3LYP/ SDD-6-31G(d,p))= -1444.20073742 hartree

| Center<br>Number | Atomic<br>Number | Atomic<br>Type | Coordinates (Angstroms) |           |           |
|------------------|------------------|----------------|-------------------------|-----------|-----------|
|                  |                  |                | X                       | Y         | Z         |
| 1                | 7                | 0              | 1.428802                | 1.165615  | -1.158701 |
| 2                | 6                | 0              | 2.329743                | 0.498858  | -2.136779 |
| 3                | 1                | 0              | 1.716627                | -0.138891 | -2.780509 |
| 4                | 1                | 0              | 2.823113                | 1.228208  | -2.794815 |
| 5                | 6                | 0              | 2.146513                | 2.319266  | -0.577769 |
| 6                | 1                | 0              | 3.168570                | 1.993649  | -0.345820 |
| 7                | 1                | 0              | 2.238699                | 3.142215  | -1.301682 |
| 8                | 6                | 0              | 0.141156                | 1.584896  | -1.778845 |
| 9                | 1                | 0              | -0.312536               | 2.329655  | -1.119039 |
| 10               | 1                | 0              | 0.316145                | 2.087998  | -2.741257 |
| 11               | 26               | 0              | 0.886660                | -0.861151 | 0.101688  |
| 12               | 6                | 0              | 3.360738                | -0.363755 | -1.437802 |
| 13               | 6                | 0              | 4.677395                | -0.453832 | -1.881950 |
| 14               | 6                | 0              | 3.773137                | -1.906762 | 0.253938  |
| 15               | 6                | 0              | 5.561860                | -1.310411 | -1.223013 |
| 16               | 1                | 0              | 5.004760                | 0.134174  | -2.733279 |
| 17               | 6                | 0              | 5.101675                | -2.047890 | -0.132798 |
| 18               | 1                | 0              | 3.371905                | -2.471336 | 1.088924  |
| 19               | 1                | 0              | 6.591582                | -1.396676 | -1.554853 |
| 20               | 1                | 0              | 5.753631                | -2.724006 | 0.408757  |
| 21               | 6                | 0              | 1.564603                | 2.884507  | 0.699318  |
| 22               | 6                | 0              | 1.630973                | 4.236088  | 1.026923  |
| 23               | 6                | 0              | 1.176100                | 4.674842  | 2.272720  |
| 24               | 1                | 0              | 2.044312                | 4.937632  | 0.310420  |
| 25               | 6                | 0              | 0.583066                | 2.425266  | 2.825408  |

|    |   |   |           |           |           |
|----|---|---|-----------|-----------|-----------|
| 26 | 6 | 0 | 0.646688  | 3.758480  | 3.188518  |
| 27 | 1 | 0 | 1.232234  | 5.728578  | 2.527579  |
| 28 | 1 | 0 | 0.181875  | 1.644310  | 3.461385  |
| 29 | 1 | 0 | 0.285782  | 4.071635  | 4.161332  |
| 30 | 7 | 0 | 2.912656  | -1.084219 | -0.382055 |
| 31 | 7 | 0 | 1.037967  | 2.036683  | 1.613573  |
| 32 | 6 | 0 | -0.836978 | 0.424585  | -2.000720 |
| 33 | 1 | 0 | -1.751978 | 0.825813  | -2.454413 |
| 34 | 1 | 0 | -0.419654 | -0.282949 | -2.722764 |
| 35 | 7 | 0 | -1.125834 | -0.324920 | -0.754155 |
| 36 | 6 | 0 | -1.655540 | -1.684603 | -1.034566 |
| 37 | 1 | 0 | -2.710360 | -1.662248 | -1.329587 |
| 38 | 1 | 0 | -1.093583 | -2.096472 | -1.881484 |
| 39 | 6 | 0 | -2.037887 | 0.428834  | 0.188155  |
| 40 | 1 | 0 | -2.064356 | -0.152744 | 1.113983  |
| 41 | 1 | 0 | -1.538268 | 1.373513  | 0.419754  |
| 42 | 6 | 0 | -3.447906 | 0.699838  | -0.294064 |
| 43 | 6 | 0 | -4.489727 | -0.188861 | 0.014888  |
| 44 | 6 | 0 | -3.749934 | 1.855767  | -1.031315 |
| 45 | 6 | 0 | -5.791205 | 0.055937  | -0.425068 |
| 46 | 1 | 0 | -4.287618 | -1.066755 | 0.624379  |
| 47 | 6 | 0 | -5.049880 | 2.102113  | -1.474380 |
| 48 | 1 | 0 | -2.971322 | 2.585965  | -1.242634 |
| 49 | 6 | 0 | -6.071921 | 1.198615  | -1.176564 |
| 50 | 1 | 0 | -6.587114 | -0.637342 | -0.171668 |
| 51 | 1 | 0 | -5.267477 | 3.002771  | -2.039856 |
| 52 | 1 | 0 | -7.084629 | 1.392001  | -1.515471 |
| 53 | 6 | 0 | -1.458816 | -2.595886 | 0.161994  |
| 54 | 6 | 0 | -2.360862 | -3.609904 | 0.477235  |
| 55 | 6 | 0 | -2.094187 | -4.446630 | 1.561596  |
| 56 | 1 | 0 | -3.256491 | -3.740893 | -0.121315 |
| 57 | 6 | 0 | -0.082868 | -3.202622 | 1.937047  |
| 58 | 6 | 0 | -0.934840 | -4.236268 | 2.308806  |
| 59 | 1 | 0 | -2.782400 | -5.244585 | 1.821596  |
| 60 | 1 | 0 | 0.829149  | -3.004327 | 2.490931  |
| 61 | 1 | 0 | -0.692105 | -4.857998 | 3.163235  |
| 62 | 7 | 0 | -0.329706 | -2.398567 | 0.881998  |
| 63 | 1 | 0 | 0.954595  | 1.024087  | 1.344188  |

-----  
Fe<sup>III</sup>-H 2''<sub>D</sub> (quartet) E(B3LYP/ SDD-6-31G(d,p))= -1444.20870188 hartree

-----  
Center      Atomic      Atomic      Coordinates (Angstroms)  
Number      Number      Type      X                  Y                  Z

|    |    |   |           |           |           |
|----|----|---|-----------|-----------|-----------|
| 1  | 7  | 0 | 0.857205  | -0.751593 | 1.458195  |
| 2  | 6  | 0 | 1.945240  | -0.004192 | 2.141183  |
| 3  | 1  | 0 | 1.595257  | 1.019133  | 2.315708  |
| 4  | 1  | 0 | 2.176035  | -0.439674 | 3.122353  |
| 5  | 6  | 0 | 1.193785  | -2.204822 | 1.371592  |
| 6  | 1  | 0 | 2.283537  | -2.307273 | 1.371145  |
| 7  | 1  | 0 | 0.828323  | -2.744125 | 2.253131  |
| 8  | 6  | 0 | -0.482483 | -0.552374 | 2.096625  |
| 9  | 1  | 0 | -1.057203 | -1.468250 | 1.944300  |
| 10 | 1  | 0 | -0.375374 | -0.422985 | 3.180593  |
| 11 | 26 | 0 | 0.794707  | -0.007019 | -0.590373 |
| 12 | 6  | 0 | 3.178795  | 0.010926  | 1.258559  |
| 13 | 6  | 0 | 4.471945  | 0.081308  | 1.771982  |
| 14 | 6  | 0 | 3.988315  | -0.073340 | -0.924425 |
| 15 | 6  | 0 | 5.551242  | 0.082580  | 0.885829  |
| 16 | 1  | 0 | 4.632608  | 0.126382  | 2.844390  |
| 17 | 6  | 0 | 5.306868  | -0.003167 | -0.486024 |
| 18 | 1  | 0 | 3.746276  | -0.141226 | -1.980434 |
| 19 | 1  | 0 | 6.567769  | 0.136424  | 1.262598  |
| 20 | 1  | 0 | 6.118793  | -0.019932 | -1.204524 |
| 21 | 6  | 0 | 0.670571  | -2.827071 | 0.098462  |
| 22 | 6  | 0 | 0.412981  | -4.192069 | -0.003303 |
| 23 | 6  | 0 | 0.034481  | -4.725488 | -1.235805 |
| 24 | 1  | 0 | 0.514270  | -4.828317 | 0.869910  |
| 25 | 6  | 0 | 0.178237  | -2.522206 | -2.166323 |
| 26 | 6  | 0 | -0.079576 | -3.875949 | -2.337270 |
| 27 | 1  | 0 | -0.167409 | -5.787461 | -1.333668 |
| 28 | 1  | 0 | 0.097605  | -1.823655 | -2.990280 |
| 29 | 1  | 0 | -0.365764 | -4.250201 | -3.313732 |
| 30 | 7  | 0 | 2.943979  | -0.055991 | -0.071984 |
| 31 | 7  | 0 | 0.541544  | -2.001602 | -0.971296 |
| 32 | 6  | 0 | -1.228450 | 0.634074  | 1.497254  |
| 33 | 1  | 0 | -2.218535 | 0.719821  | 1.960815  |
| 34 | 1  | 0 | -0.691844 | 1.562378  | 1.711882  |
| 35 | 7  | 0 | -1.348228 | 0.505459  | 0.015228  |
| 36 | 6  | 0 | -1.649998 | 1.824287  | -0.587101 |
| 37 | 1  | 0 | -1.949365 | 1.656536  | -1.628147 |
| 38 | 1  | 0 | -2.497265 | 2.313233  | -0.092642 |
| 39 | 6  | 0 | -2.384935 | -0.518867 | -0.406515 |
| 40 | 1  | 0 | -2.296742 | -0.598134 | -1.494031 |
| 41 | 1  | 0 | -2.071536 | -1.478340 | 0.009870  |
| 42 | 6  | 0 | -3.816722 | -0.221650 | -0.015860 |
| 43 | 6  | 0 | -4.658664 | 0.496912  | -0.878815 |

|    |   |   |           |           |           |
|----|---|---|-----------|-----------|-----------|
| 44 | 6 | 0 | -4.339246 | -0.686746 | 1.201563  |
| 45 | 6 | 0 | -5.979965 | 0.767406  | -0.522334 |
| 46 | 1 | 0 | -4.291383 | 0.825938  | -1.848153 |
| 47 | 6 | 0 | -5.659943 | -0.415563 | 1.561185  |
| 48 | 1 | 0 | -3.722150 | -1.290321 | 1.864119  |
| 49 | 6 | 0 | -6.480326 | 0.317366  | 0.701390  |
| 50 | 1 | 0 | -6.621977 | 1.315580  | -1.204549 |
| 51 | 1 | 0 | -6.051817 | -0.787548 | 2.502549  |
| 52 | 1 | 0 | -7.510182 | 0.521951  | 0.975980  |
| 53 | 6 | 0 | -0.438546 | 2.723084  | -0.578851 |
| 54 | 6 | 0 | -0.563514 | 4.111540  | -0.623095 |
| 55 | 6 | 0 | 0.581897  | 4.899460  | -0.703348 |
| 56 | 1 | 0 | -1.550623 | 4.561599  | -0.600889 |
| 57 | 6 | 0 | 1.879976  | 2.886094  | -0.673282 |
| 58 | 6 | 0 | 1.828561  | 4.271593  | -0.731863 |
| 59 | 1 | 0 | 0.504435  | 5.981214  | -0.744429 |
| 60 | 1 | 0 | 2.826530  | 2.362736  | -0.699204 |
| 61 | 1 | 0 | 2.748238  | 4.841662  | -0.800060 |
| 62 | 7 | 0 | 0.770452  | 2.118902  | -0.586849 |
| 63 | 1 | 0 | 1.019282  | 0.220391  | -2.076428 |

-----  
Fe<sup>III</sup>-H 2''<sub>D</sub>(doublet) E(B3LYP/ SDD-6-31G(d,p))= -1444.21153170 hartree

| Center<br>Number | Atomic<br>Number | Atomic<br>Type | Coordinates (Angstroms) |           |           |
|------------------|------------------|----------------|-------------------------|-----------|-----------|
|                  |                  |                | X                       | Y         | Z         |
| 1                | 7                | 0              | 0.832836                | -0.677665 | 1.570492  |
| 2                | 6                | 0              | 1.979750                | 0.088395  | 2.121167  |
| 3                | 1                | 0              | 1.664357                | 1.128210  | 2.260281  |
| 4                | 1                | 0              | 2.300916                | -0.291529 | 3.099698  |
| 5                | 6                | 0              | 1.140554                | -2.137333 | 1.550191  |
| 6                | 1                | 0              | 2.224864                | -2.270079 | 1.622413  |
| 7                | 1                | 0              | 0.710321                | -2.642019 | 2.422480  |
| 8                | 6                | 0              | -0.488704               | -0.406268 | 2.214269  |
| 9                | 1                | 0              | -1.067941               | -1.331074 | 2.172961  |
| 10               | 1                | 0              | -0.369855               | -0.154095 | 3.275063  |
| 11               | 26               | 0              | 0.719446                | 0.024602  | -0.456031 |
| 12               | 6                | 0              | 3.109117                | 0.015841  | 1.111469  |
| 13               | 6                | 0              | 4.456750                | 0.027414  | 1.458052  |
| 14               | 6                | 0              | 3.643934                | -0.136508 | -1.162009 |
| 15               | 6                | 0              | 5.419764                | -0.042100 | 0.447892  |
| 16               | 1                | 0              | 4.748196                | 0.083642  | 2.501838  |
| 17               | 6                | 0              | 5.007183                | -0.131312 | -0.881714 |

|    |   |   |           |           |           |
|----|---|---|-----------|-----------|-----------|
| 18 | 1 | 0 | 3.270130  | -0.192661 | -2.178205 |
| 19 | 1 | 0 | 6.475775  | -0.035156 | 0.698569  |
| 20 | 1 | 0 | 5.723444  | -0.195304 | -1.693162 |
| 21 | 6 | 0 | 0.678559  | -2.774514 | 0.262622  |
| 22 | 6 | 0 | 0.491391  | -4.148786 | 0.136072  |
| 23 | 6 | 0 | 0.164788  | -4.678916 | -1.112188 |
| 24 | 1 | 0 | 0.607737  | -4.793189 | 1.001535  |
| 25 | 6 | 0 | 0.217055  | -2.453211 | -2.001240 |
| 26 | 6 | 0 | 0.033221  | -3.815703 | -2.200755 |
| 27 | 1 | 0 | 0.017470  | -5.747482 | -1.232371 |
| 28 | 1 | 0 | 0.115871  | -1.742937 | -2.812586 |
| 29 | 1 | 0 | -0.212943 | -4.185479 | -3.189752 |
| 30 | 7 | 0 | 2.716596  | -0.060922 | -0.187130 |
| 31 | 7 | 0 | 0.527732  | -1.936572 | -0.789949 |
| 32 | 6 | 0 | -1.232908 | 0.707014  | 1.488912  |
| 33 | 1 | 0 | -2.258060 | 0.788290  | 1.865565  |
| 34 | 1 | 0 | -0.744112 | 1.666376  | 1.668272  |
| 35 | 7 | 0 | -1.251781 | 0.472991  | -0.000256 |
| 36 | 6 | 0 | -1.550982 | 1.757879  | -0.695456 |
| 37 | 1 | 0 | -1.718734 | 1.530048  | -1.753450 |
| 38 | 1 | 0 | -2.467942 | 2.212097  | -0.306831 |
| 39 | 6 | 0 | -2.273854 | -0.587654 | -0.400584 |
| 40 | 1 | 0 | -2.134815 | -0.733806 | -1.474226 |
| 41 | 1 | 0 | -1.974849 | -1.511411 | 0.096248  |
| 42 | 6 | 0 | -3.718710 | -0.267658 | -0.090569 |
| 43 | 6 | 0 | -4.521070 | 0.401580  | -1.028298 |
| 44 | 6 | 0 | -4.297893 | -0.679173 | 1.120796  |
| 45 | 6 | 0 | -5.859491 | 0.678419  | -0.749407 |
| 46 | 1 | 0 | -4.108583 | 0.686224  | -1.993360 |
| 47 | 6 | 0 | -5.636075 | -0.401945 | 1.401992  |
| 48 | 1 | 0 | -3.710725 | -1.246553 | 1.840102  |
| 49 | 6 | 0 | -6.416787 | 0.282993  | 0.468743  |
| 50 | 1 | 0 | -6.470464 | 1.188327  | -1.487441 |
| 51 | 1 | 0 | -6.071927 | -0.732543 | 2.339386  |
| 52 | 1 | 0 | -7.460058 | 0.492262  | 0.682358  |
| 53 | 6 | 0 | -0.377778 | 2.686612  | -0.570425 |
| 54 | 6 | 0 | -0.509161 | 4.069502  | -0.666458 |
| 55 | 6 | 0 | 0.630900  | 4.868107  | -0.605410 |
| 56 | 1 | 0 | -1.493372 | 4.508259  | -0.793158 |
| 57 | 6 | 0 | 1.922847  | 2.864857  | -0.336826 |
| 58 | 6 | 0 | 1.869376  | 4.249707  | -0.437871 |
| 59 | 1 | 0 | 0.553995  | 5.947613  | -0.684814 |
| 60 | 1 | 0 | 2.872538  | 2.363477  | -0.213115 |
| 61 | 1 | 0 | 2.786598  | 4.825352  | -0.384697 |

|    |   |   |          |          |           |
|----|---|---|----------|----------|-----------|
| 62 | 7 | 0 | 0.822772 | 2.084022 | -0.398069 |
| 63 | 1 | 0 | 0.658827 | 0.349062 | -1.916207 |

-----

Fe<sup>III</sup>-H 2''<sub>D</sub>(sextet) E(B3LYP/ SDD-6-31G(d,p))=-1444.19676827 hartree

-----

| Center<br>Number | Atomic<br>Number | Atomic<br>Type | Coordinates (Angstroms) |           |           |
|------------------|------------------|----------------|-------------------------|-----------|-----------|
|                  |                  |                | X                       | Y         | Z         |
| 1                | 7                | 0              | 0.864493                | -0.817565 | 1.485468  |
| 2                | 6                | 0              | 1.963607                | -0.038447 | 2.107560  |
| 3                | 1                | 0              | 1.605907                | 0.982238  | 2.284383  |
| 4                | 1                | 0              | 2.250477                | -0.450982 | 3.083782  |
| 5                | 6                | 0              | 1.203321                | -2.263343 | 1.432547  |
| 6                | 1                | 0              | 2.294027                | -2.360524 | 1.416815  |
| 7                | 1                | 0              | 0.857666                | -2.782310 | 2.334818  |
| 8                | 6                | 0              | -0.461659               | -0.585848 | 2.126308  |
| 9                | 1                | 0              | -1.060137               | -1.486097 | 1.972156  |
| 10               | 1                | 0              | -0.356824               | -0.459348 | 3.211613  |
| 11               | 26               | 0              | 0.773843                | 0.044894  | -0.662646 |
| 12               | 6                | 0              | 3.157600                | -0.007294 | 1.172366  |
| 13               | 6                | 0              | 4.475446                | 0.005387  | 1.620914  |
| 14               | 6                | 0              | 3.864499                | 0.015842  | -1.056938 |
| 15               | 6                | 0              | 5.511303                | 0.031860  | 0.683548  |
| 16               | 1                | 0              | 4.688410                | -0.013004 | 2.684852  |
| 17               | 6                | 0              | 5.202562                | 0.030678  | -0.678017 |
| 18               | 1                | 0              | 3.567499                | 0.013696  | -2.101532 |
| 19               | 1                | 0              | 6.545406                | 0.040641  | 1.013509  |
| 20               | 1                | 0              | 5.979356                | 0.036340  | -1.434405 |
| 21               | 6                | 0              | 0.661981                | -2.927900 | 0.185881  |
| 22               | 6                | 0              | 0.411228                | -4.297622 | 0.137182  |
| 23               | 6                | 0              | 0.023157                | -4.874135 | -1.073051 |
| 24               | 1                | 0              | 0.526648                | -4.903665 | 1.030172  |
| 25               | 6                | 0              | 0.144008                | -2.700598 | -2.073529 |
| 26               | 6                | 0              | -0.105395               | -4.061995 | -2.200658 |
| 27               | 1                | 0              | -0.174084               | -5.939782 | -1.133379 |
| 28               | 1                | 0              | 0.050708                | -2.022637 | -2.914902 |
| 29               | 1                | 0              | -0.398364               | -4.470129 | -3.161485 |
| 30               | 7                | 0              | 2.865784                | 0.006003  | -0.149749 |
| 31               | 7                | 0              | 0.515680                | -2.140555 | -0.902627 |
| 32               | 6                | 0              | -1.177853               | 0.625074  | 1.533254  |
| 33               | 1                | 0              | -2.176746               | 0.717342  | 1.974844  |
| 34               | 1                | 0              | -0.634603               | 1.543496  | 1.771198  |
| 35               | 7                | 0              | -1.278896               | 0.529295  | 0.044874  |

|    |   |   |           |           |           |
|----|---|---|-----------|-----------|-----------|
| 36 | 6 | 0 | -1.600738 | 1.858553  | -0.541320 |
| 37 | 1 | 0 | -1.865512 | 1.698903  | -1.592497 |
| 38 | 1 | 0 | -2.478064 | 2.298415  | -0.055487 |
| 39 | 6 | 0 | -2.305302 | -0.500717 | -0.413849 |
| 40 | 1 | 0 | -2.183082 | -0.571246 | -1.498039 |
| 41 | 1 | 0 | -1.999644 | -1.458824 | 0.008225  |
| 42 | 6 | 0 | -3.745172 | -0.202299 | -0.059205 |
| 43 | 6 | 0 | -4.569887 | 0.496994  | -0.954329 |
| 44 | 6 | 0 | -4.295266 | -0.656609 | 1.150412  |
| 45 | 6 | 0 | -5.902565 | 0.759391  | -0.636607 |
| 46 | 1 | 0 | -4.179749 | 0.815742  | -1.918098 |
| 47 | 6 | 0 | -5.627362 | -0.392890 | 1.470908  |
| 48 | 1 | 0 | -3.691740 | -1.247597 | 1.836206  |
| 49 | 6 | 0 | -6.430997 | 0.320893  | 0.579554  |
| 50 | 1 | 0 | -6.531274 | 1.291866  | -1.343163 |
| 51 | 1 | 0 | -6.041192 | -0.756768 | 2.405980  |
| 52 | 1 | 0 | -7.469714 | 0.519077  | 0.823774  |
| 53 | 6 | 0 | -0.426117 | 2.803635  | -0.487650 |
| 54 | 6 | 0 | -0.601041 | 4.186318  | -0.501359 |
| 55 | 6 | 0 | 0.520197  | 5.013099  | -0.549363 |
| 56 | 1 | 0 | -1.602062 | 4.604595  | -0.481806 |
| 57 | 6 | 0 | 1.887484  | 3.046947  | -0.540034 |
| 58 | 6 | 0 | 1.789383  | 4.431173  | -0.572481 |
| 59 | 1 | 0 | 0.406140  | 6.092308  | -0.567186 |
| 60 | 1 | 0 | 2.853368  | 2.556752  | -0.553697 |
| 61 | 1 | 0 | 2.688107  | 5.036289  | -0.611987 |
| 62 | 7 | 0 | 0.803414  | 2.242059  | -0.494964 |
| 63 | 1 | 0 | 0.617294  | 0.076415  | -2.309166 |

-----  
Fe<sup>III</sup>-H 2''<sub>E</sub> (doublet) E(B3LYP/ SDD-6-31G(d,p))= -1444.21455186 hartree

| Center<br>Number | Atomic<br>Number | Atomic<br>Type | Coordinates (Angstroms) |          |           |
|------------------|------------------|----------------|-------------------------|----------|-----------|
|                  |                  |                | X                       | Y        | Z         |
| 1                | 7                | 0              | 1.267481                | 1.496916 | -1.398152 |
| 2                | 6                | 0              | 2.544538                | 1.121216 | -2.077398 |
| 3                | 1                | 0              | 2.477120                | 1.268519 | -3.161057 |
| 4                | 1                | 0              | 3.331239                | 1.789104 | -1.711412 |
| 5                | 6                | 0              | 1.249892                | 2.941853 | -1.015565 |
| 6                | 1                | 0              | 2.270827                | 3.232896 | -0.748860 |
| 7                | 1                | 0              | 0.935338                | 3.576610 | -1.851976 |
| 8                | 6                | 0              | 0.060986                | 1.155622 | -2.244997 |
| 9                | 1                | 0              | -0.727769               | 1.863367 | -1.981777 |

|    |    |   |           |           |           |
|----|----|---|-----------|-----------|-----------|
| 10 | 1  | 0 | 0.290053  | 1.312646  | -3.304986 |
| 11 | 26 | 0 | 1.107952  | 0.411529  | 0.309735  |
| 12 | 6  | 0 | 2.960056  | -0.285921 | -1.735256 |
| 13 | 6  | 0 | 3.887710  | -0.989110 | -2.500509 |
| 14 | 6  | 0 | 2.927258  | -1.972828 | -0.131182 |
| 15 | 6  | 0 | 4.345962  | -2.224826 | -2.047188 |
| 16 | 1  | 0 | 4.255626  | -0.564334 | -3.428829 |
| 17 | 6  | 0 | 3.863234  | -2.718848 | -0.833784 |
| 18 | 1  | 0 | 2.532931  | -2.320310 | 0.814689  |
| 19 | 1  | 0 | 5.072987  | -2.786898 | -2.624544 |
| 20 | 1  | 0 | 4.204277  | -3.666978 | -0.433626 |
| 21 | 6  | 0 | 0.380065  | 3.146118  | 0.198709  |
| 22 | 6  | 0 | -0.200494 | 4.371918  | 0.511693  |
| 23 | 6  | 0 | -0.887989 | 4.510949  | 1.717845  |
| 24 | 1  | 0 | -0.103576 | 5.207253  | -0.174083 |
| 25 | 6  | 0 | -0.389945 | 2.214485  | 2.192036  |
| 26 | 6  | 0 | -0.978119 | 3.413592  | 2.574753  |
| 27 | 1  | 0 | -1.341823 | 5.460086  | 1.984235  |
| 28 | 1  | 0 | -0.443704 | 1.336417  | 2.823603  |
| 29 | 1  | 0 | -1.497067 | 3.478996  | 3.524388  |
| 30 | 7  | 0 | 2.464027  | -0.783341 | -0.576399 |
| 31 | 7  | 0 | 0.271093  | 2.075032  | 1.024398  |
| 32 | 6  | 0 | -0.425201 | -0.273558 | -2.002869 |
| 33 | 1  | 0 | -1.327930 | -0.464609 | -2.593267 |
| 34 | 1  | 0 | 0.327717  | -0.997739 | -2.322308 |
| 35 | 7  | 0 | -0.666685 | -0.454309 | -0.545111 |
| 36 | 6  | 0 | -0.578751 | -1.860536 | -0.068681 |
| 37 | 1  | 0 | -1.520315 | -2.399390 | -0.211765 |
| 38 | 1  | 0 | 0.179546  | -2.379537 | -0.664576 |
| 39 | 6  | 0 | -1.982426 | 0.168489  | -0.091981 |
| 40 | 1  | 0 | -1.993871 | 0.081751  | 0.997251  |
| 41 | 1  | 0 | -1.927767 | 1.232878  | -0.324609 |
| 42 | 6  | 0 | -3.240553 | -0.433394 | -0.675257 |
| 43 | 6  | 0 | -3.917290 | -1.464312 | -0.003235 |
| 44 | 6  | 0 | -3.783439 | 0.055708  | -1.874693 |
| 45 | 6  | 0 | -5.083650 | -2.016895 | -0.533491 |
| 46 | 1  | 0 | -3.549992 | -1.816332 | 0.958432  |
| 47 | 6  | 0 | -4.949018 | -0.496066 | -2.407230 |
| 48 | 1  | 0 | -3.314602 | 0.894778  | -2.384299 |
| 49 | 6  | 0 | -5.596056 | -1.538916 | -1.741161 |
| 50 | 1  | 0 | -5.599963 | -2.807372 | 0.001895  |
| 51 | 1  | 0 | -5.360059 | -0.102816 | -3.331574 |
| 52 | 1  | 0 | -6.506542 | -1.963653 | -2.151521 |
| 53 | 6  | 0 | -0.156327 | -1.876691 | 1.388552  |



|    |   |   |           |           |          |
|----|---|---|-----------|-----------|----------|
| 54 | 6 | 0 | -0.548830 | -2.877262 | 2.275087 |
| 55 | 6 | 0 | -0.057063 | -2.865478 | 3.581573 |
| 56 | 1 | 0 | -1.228690 | -3.655224 | 1.943374 |
| 57 | 6 | 0 | 1.165089  | -0.875165 | 3.038999 |
| 58 | 6 | 0 | 0.816559  | -1.848266 | 3.969122 |
| 59 | 1 | 0 | -0.352426 | -3.637294 | 4.285249 |
| 60 | 1 | 0 | 1.844719  | -0.067389 | 3.287155 |
| 61 | 1 | 0 | 1.224262  | -1.804673 | 4.972911 |
| 62 | 7 | 0 | 0.689317  | -0.883177 | 1.775234 |
| 63 | 1 | 0 | 2.308898  | 0.950372  | 1.015623 |

-----  
 $\text{Fe}^{\text{III}}\text{-H } 2''_{\text{E}}$  (quartet) E(B3LYP/ SDD-6-31G(d,p))= -1444.20845559 hartree

| Center<br>Number | Atomic<br>Number | Atomic<br>Type | Coordinates (Angstroms) |           |           |
|------------------|------------------|----------------|-------------------------|-----------|-----------|
|                  |                  |                | X                       | Y         | Z         |
| 1                | 7                | 0              | 1.367103                | 1.652690  | -1.236514 |
| 2                | 6                | 0              | 2.632947                | 1.286913  | -1.913683 |
| 3                | 1                | 0              | 2.579436                | 1.484697  | -2.991815 |
| 4                | 1                | 0              | 3.430237                | 1.926402  | -1.520208 |
| 5                | 6                | 0              | 1.380067                | 3.042483  | -0.720046 |
| 6                | 1                | 0              | 2.404957                | 3.286701  | -0.421800 |
| 7                | 1                | 0              | 1.090861                | 3.768122  | -1.491080 |
| 8                | 6                | 0              | 0.160010                | 1.397316  | -2.089159 |
| 9                | 1                | 0              | -0.625585               | 2.080763  | -1.758586 |
| 10               | 1                | 0              | 0.373093                | 1.645392  | -3.136946 |
| 11               | 26               | 0              | 1.078101                | 0.296506  | 0.531338  |
| 12               | 6                | 0              | 3.060085                | -0.146808 | -1.669371 |
| 13               | 6                | 0              | 4.001378                | -0.761623 | -2.495652 |
| 14               | 6                | 0              | 3.030499                | -1.996541 | -0.256304 |
| 15               | 6                | 0              | 4.469899                | -2.032409 | -2.168842 |
| 16               | 1                | 0              | 4.369018                | -0.242211 | -3.375005 |
| 17               | 6                | 0              | 3.980504                | -2.659443 | -1.020654 |
| 18               | 1                | 0              | 2.621333                | -2.443063 | 0.642795  |
| 19               | 1                | 0              | 5.208070                | -2.522989 | -2.795283 |
| 20               | 1                | 0              | 4.325763                | -3.642761 | -0.721792 |
| 21               | 6                | 0              | 0.502360                | 3.202844  | 0.505803  |
| 22               | 6                | 0              | -0.014243               | 4.443250  | 0.877874  |
| 23               | 6                | 0              | -0.718371               | 4.558399  | 2.076036  |
| 24               | 1                | 0              | 0.144422                | 5.307540  | 0.240916  |
| 25               | 6                | 0              | -0.373896               | 2.216764  | 2.431528  |
| 26               | 6                | 0              | -0.897762               | 3.424464  | 2.871488  |
| 27               | 1                | 0              | -1.120087               | 5.518226  | 2.384875  |

|    |   |   |           |           |           |
|----|---|---|-----------|-----------|-----------|
| 28 | 1 | 0 | -0.494585 | 1.306064  | 3.008903  |
| 29 | 1 | 0 | -1.435276 | 3.471532  | 3.811826  |
| 30 | 7 | 0 | 2.568479  | -0.768221 | -0.577766 |
| 31 | 7 | 0 | 0.306522  | 2.106249  | 1.270629  |
| 32 | 6 | 0 | -0.337120 | -0.047010 | -1.996014 |
| 33 | 1 | 0 | -1.220412 | -0.174758 | -2.631077 |
| 34 | 1 | 0 | 0.426459  | -0.735761 | -2.365095 |
| 35 | 7 | 0 | -0.633994 | -0.404007 | -0.577762 |
| 36 | 6 | 0 | -0.622346 | -1.874054 | -0.332182 |
| 37 | 1 | 0 | -1.558651 | -2.339590 | -0.655480 |
| 38 | 1 | 0 | 0.179938  | -2.311757 | -0.936088 |
| 39 | 6 | 0 | -1.947583 | 0.200320  | -0.087245 |
| 40 | 1 | 0 | -2.005449 | -0.036495 | 0.978400  |
| 41 | 1 | 0 | -1.845391 | 1.283170  | -0.167396 |
| 42 | 6 | 0 | -3.201953 | -0.261127 | -0.793702 |
| 43 | 6 | 0 | -3.944463 | -1.345244 | -0.298496 |
| 44 | 6 | 0 | -3.675688 | 0.415789  | -1.929262 |
| 45 | 6 | 0 | -5.110947 | -1.762720 | -0.940365 |
| 46 | 1 | 0 | -3.627511 | -1.846719 | 0.613355  |
| 47 | 6 | 0 | -4.840777 | -0.000971 | -2.573484 |
| 48 | 1 | 0 | -3.150699 | 1.294304  | -2.297905 |
| 49 | 6 | 0 | -5.556021 | -1.095811 | -2.083581 |
| 50 | 1 | 0 | -5.679661 | -2.596516 | -0.541077 |
| 51 | 1 | 0 | -5.198220 | 0.536470  | -3.446054 |
| 52 | 1 | 0 | -6.466489 | -1.416057 | -2.579832 |
| 53 | 6 | 0 | -0.347638 | -2.169523 | 1.130493  |
| 54 | 6 | 0 | -0.878297 | -3.281220 | 1.780612  |
| 55 | 6 | 0 | -0.525416 | -3.526919 | 3.109350  |
| 56 | 1 | 0 | -1.555983 | -3.944716 | 1.253441  |
| 57 | 6 | 0 | 0.841523  | -1.560518 | 3.049078  |
| 58 | 6 | 0 | 0.349585  | -2.652286 | 3.755549  |
| 59 | 1 | 0 | -0.929766 | -4.388007 | 3.632168  |
| 60 | 1 | 0 | 1.530401  | -0.856021 | 3.503638  |
| 61 | 1 | 0 | 0.648253  | -2.809626 | 4.785917  |
| 62 | 7 | 0 | 0.501093  | -1.319361 | 1.764761  |
| 63 | 1 | 0 | 2.288470  | 0.731180  | 1.339445  |

-----  
Fe<sup>III</sup>-H 2''<sub>E</sub> (sextet) E(B3LYP/ SDD-6-31G(d,p))= -1444.19078950 hartree  
-----

| Center<br>Number | Atomic<br>Number | Atomic<br>Type | Coordinates (Angstroms) |          |           |
|------------------|------------------|----------------|-------------------------|----------|-----------|
|                  |                  |                | X                       | Y        | Z         |
| 1                | 7                | 0              | 1.410952                | 1.616177 | -1.178422 |
| 2                | 6                | 0              | 2.625292                | 1.232210 | -1.951451 |

|    |    |   |           |           |           |
|----|----|---|-----------|-----------|-----------|
| 3  | 1  | 0 | 2.474269  | 1.401559  | -3.024071 |
| 4  | 1  | 0 | 3.448182  | 1.888428  | -1.648906 |
| 5  | 6  | 0 | 1.508861  | 3.016262  | -0.676012 |
| 6  | 1  | 0 | 2.536945  | 3.182554  | -0.336068 |
| 7  | 1  | 0 | 1.311718  | 3.740921  | -1.475994 |
| 8  | 6  | 0 | 0.151613  | 1.433321  | -1.978204 |
| 9  | 1  | 0 | -0.597534 | 2.112986  | -1.567068 |
| 10 | 1  | 0 | 0.324834  | 1.741577  | -3.016590 |
| 11 | 26 | 0 | 1.199860  | 0.289085  | 0.641014  |
| 12 | 6  | 0 | 3.073352  | -0.190905 | -1.698839 |
| 13 | 6  | 0 | 3.990587  | -0.819056 | -2.541241 |
| 14 | 6  | 0 | 3.100243  | -2.006920 | -0.238449 |
| 15 | 6  | 0 | 4.472317  | -2.081144 | -2.199060 |
| 16 | 1  | 0 | 4.329942  | -0.319511 | -3.443112 |
| 17 | 6  | 0 | 4.025209  | -2.683561 | -1.019822 |
| 18 | 1  | 0 | 2.725997  | -2.429140 | 0.687424  |
| 19 | 1  | 0 | 5.191052  | -2.584448 | -2.837971 |
| 20 | 1  | 0 | 4.386436  | -3.657908 | -0.710747 |
| 21 | 6  | 0 | 0.587208  | 3.249544  | 0.500569  |
| 22 | 6  | 0 | 0.120654  | 4.518875  | 0.836355  |
| 23 | 6  | 0 | -0.631437 | 4.677990  | 2.000526  |
| 24 | 1  | 0 | 0.351252  | 5.368597  | 0.201914  |
| 25 | 6  | 0 | -0.415352 | 2.325483  | 2.390939  |
| 26 | 6  | 0 | -0.900905 | 3.561879  | 2.795821  |
| 27 | 1  | 0 | -0.999674 | 5.658855  | 2.283912  |
| 28 | 1  | 0 | -0.598265 | 1.429131  | 2.974877  |
| 29 | 1  | 0 | -1.476492 | 3.645329  | 3.710757  |
| 30 | 7  | 0 | 2.622427  | -0.787735 | -0.576549 |
| 31 | 7  | 0 | 0.306500  | 2.170421  | 1.262043  |
| 32 | 6  | 0 | -0.371356 | -0.000823 | -1.944425 |
| 33 | 1  | 0 | -1.252509 | -0.080664 | -2.591354 |
| 34 | 1  | 0 | 0.379728  | -0.686313 | -2.345288 |
| 35 | 7  | 0 | -0.683118 | -0.415175 | -0.550379 |
| 36 | 6  | 0 | -0.683784 | -1.888298 | -0.382326 |
| 37 | 1  | 0 | -1.618059 | -2.338186 | -0.734185 |
| 38 | 1  | 0 | 0.124167  | -2.304575 | -0.994490 |
| 39 | 6  | 0 | -1.988581 | 0.179430  | -0.041164 |
| 40 | 1  | 0 | -2.055175 | -0.103520 | 1.012950  |
| 41 | 1  | 0 | -1.875909 | 1.264063  | -0.070464 |
| 42 | 6  | 0 | -3.246923 | -0.233188 | -0.771962 |
| 43 | 6  | 0 | -4.001520 | -1.333949 | -0.335116 |
| 44 | 6  | 0 | -3.709786 | 0.503408  | -1.874259 |
| 45 | 6  | 0 | -5.169053 | -1.707899 | -1.001534 |
| 46 | 1  | 0 | -3.693438 | -1.883337 | 0.551841  |

|    |   |   |           |           |           |
|----|---|---|-----------|-----------|-----------|
| 47 | 6 | 0 | -4.876120 | 0.130725  | -2.542984 |
| 48 | 1 | 0 | -3.175344 | 1.394531  | -2.196601 |
| 49 | 6 | 0 | -5.603532 | -0.980354 | -2.111352 |
| 50 | 1 | 0 | -5.746987 | -2.555298 | -0.646473 |
| 51 | 1 | 0 | -5.225107 | 0.714581  | -3.388770 |
| 52 | 1 | 0 | -6.515060 | -1.266709 | -2.626039 |
| 53 | 6 | 0 | -0.426215 | -2.242852 | 1.066292  |
| 54 | 6 | 0 | -0.965870 | -3.370912 | 1.678610  |
| 55 | 6 | 0 | -0.632472 | -3.650575 | 3.005754  |
| 56 | 1 | 0 | -1.636384 | -4.018874 | 1.123647  |
| 57 | 6 | 0 | 0.737272  | -1.684732 | 3.016515  |
| 58 | 6 | 0 | 0.232594  | -2.792613 | 3.687183  |
| 59 | 1 | 0 | -1.044738 | -4.524356 | 3.500651  |
| 60 | 1 | 0 | 1.423762  | -0.990840 | 3.490314  |
| 61 | 1 | 0 | 0.514996  | -2.975067 | 4.718003  |
| 62 | 7 | 0 | 0.412547  | -1.414438 | 1.733067  |
| 63 | 1 | 0 | 2.292122  | 0.506612  | 1.881037  |

-----  
Fe<sup>III</sup>-H 2''<sub>F</sub>(quartet) E(B3LYP/ SDD-6-31G(d,p))= -1444.20833685 hartree

| Center<br>Number | Atomic<br>Number | Atomic<br>Type | Coordinates (Angstroms) |           |           |
|------------------|------------------|----------------|-------------------------|-----------|-----------|
|                  |                  |                | X                       | Y         | Z         |
| 1                | 7                | 0              | 1.110832                | -1.912444 | 0.407698  |
| 2                | 6                | 0              | 1.973469                | -1.780373 | 1.616300  |
| 3                | 1                | 0              | 1.702742                | -2.534373 | 2.365176  |
| 4                | 1                | 0              | 3.007473                | -1.998151 | 1.325993  |
| 5                | 6                | 0              | 1.823219                | -2.637857 | -0.672550 |
| 6                | 1                | 0              | 2.276884                | -3.571139 | -0.314823 |
| 7                | 1                | 0              | 1.090734                | -2.906225 | -1.440977 |
| 8                | 6                | 0              | -0.230696               | -2.479793 | 0.723463  |
| 9                | 1                | 0              | -0.626641               | -2.928540 | -0.189443 |
| 10               | 1                | 0              | -0.153661               | -3.282854 | 1.467143  |
| 11               | 26               | 0              | 0.772045                | 0.130571  | -0.414956 |
| 12               | 6                | 0              | 1.967952                | -0.401208 | 2.242453  |
| 13               | 6                | 0              | 2.443212                | -0.208400 | 3.540703  |
| 14               | 6                | 0              | 1.658859                | 1.891130  | 1.972778  |
| 15               | 6                | 0              | 2.530239                | 1.084998  | 4.050865  |
| 16               | 1                | 0              | 2.747396                | -1.061834 | 4.138347  |
| 17               | 6                | 0              | 2.137044                | 2.158347  | 3.247585  |
| 18               | 1                | 0              | 1.331067                | 2.690962  | 1.317743  |
| 19               | 1                | 0              | 2.900179                | 1.253832  | 5.057241  |
| 20               | 1                | 0              | 2.194410                | 3.181267  | 3.602257  |

|    |   |   |           |           |           |
|----|---|---|-----------|-----------|-----------|
| 21 | 6 | 0 | 2.877737  | -1.745301 | -1.297474 |
| 22 | 6 | 0 | 4.039729  | -2.254524 | -1.872982 |
| 23 | 6 | 0 | 4.940639  | -1.379512 | -2.480564 |
| 24 | 1 | 0 | 4.232062  | -3.322271 | -1.848106 |
| 25 | 6 | 0 | 3.490956  | 0.428569  | -1.880557 |
| 26 | 6 | 0 | 4.663090  | -0.011480 | -2.482006 |
| 27 | 1 | 0 | 5.847917  | -1.758926 | -2.939716 |
| 28 | 1 | 0 | 3.240958  | 1.484223  | -1.850528 |
| 29 | 1 | 0 | 5.340160  | 0.703612  | -2.935427 |
| 30 | 7 | 0 | 1.567248  | 0.637114  | 1.474541  |
| 31 | 7 | 0 | 2.614982  | -0.418332 | -1.302524 |
| 32 | 6 | 0 | -1.182934 | -1.394853 | 1.231384  |
| 33 | 1 | 0 | -2.156081 | -1.836898 | 1.470407  |
| 34 | 1 | 0 | -0.794501 | -0.953878 | 2.153477  |
| 35 | 7 | 0 | -1.318124 | -0.313322 | 0.219311  |
| 36 | 6 | 0 | -1.759440 | 0.976286  | 0.807873  |
| 37 | 1 | 0 | -2.838653 | 0.986672  | 0.991641  |
| 38 | 1 | 0 | -1.265092 | 1.099677  | 1.777896  |
| 39 | 6 | 0 | -2.229599 | -0.713647 | -0.940915 |
| 40 | 1 | 0 | -2.167842 | 0.101921  | -1.664788 |
| 41 | 1 | 0 | -1.770157 | -1.584553 | -1.411473 |
| 42 | 6 | 0 | -3.670104 | -1.001837 | -0.587173 |
| 43 | 6 | 0 | -4.638854 | 0.013252  | -0.647267 |
| 44 | 6 | 0 | -4.079007 | -2.299572 | -0.238614 |
| 45 | 6 | 0 | -5.972090 | -0.252783 | -0.333425 |
| 46 | 1 | 0 | -4.356295 | 1.011401  | -0.974678 |
| 47 | 6 | 0 | -5.411250 | -2.567885 | 0.076475  |
| 48 | 1 | 0 | -3.360813 | -3.116748 | -0.244377 |
| 49 | 6 | 0 | -6.358333 | -1.542494 | 0.036946  |
| 50 | 1 | 0 | -6.711102 | 0.539909  | -0.393868 |
| 51 | 1 | 0 | -5.712790 | -3.577729 | 0.335957  |
| 52 | 1 | 0 | -7.396393 | -1.752195 | 0.274185  |
| 53 | 6 | 0 | -1.366014 | 2.123325  | -0.103313 |
| 54 | 6 | 0 | -2.133334 | 3.280421  | -0.224618 |
| 55 | 6 | 0 | -1.698546 | 4.302942  | -1.068426 |
| 56 | 1 | 0 | -3.060610 | 3.372330  | 0.331486  |
| 57 | 6 | 0 | 0.200234  | 2.951945  | -1.619443 |
| 58 | 6 | 0 | -0.511682 | 4.133771  | -1.783738 |
| 59 | 1 | 0 | -2.283953 | 5.210372  | -1.177543 |
| 60 | 1 | 0 | 1.116448  | 2.770581  | -2.172014 |
| 61 | 1 | 0 | -0.147518 | 4.894766  | -2.464729 |
| 62 | 7 | 0 | -0.206686 | 1.973041  | -0.784952 |
| 63 | 1 | 0 | 0.295752  | -0.313261 | -1.778702 |

Fe<sup>III</sup>-H 2''<sub>F</sub>(doublet) E(B3LYP/ SDD-6-31G(d,p))= -1444.21159966 hartree

| Center<br>Number | Atomic<br>Number | Atomic<br>Type | Coordinates (Angstroms) |           |           |
|------------------|------------------|----------------|-------------------------|-----------|-----------|
|                  |                  |                | X                       | Y         | Z         |
| 1                | 7                | 0              | 1.040711                | -1.954807 | 0.005370  |
| 2                | 6                | 0              | 1.944948                | -2.099838 | 1.196511  |
| 3                | 1                | 0              | 1.687421                | -3.005606 | 1.756090  |
| 4                | 1                | 0              | 2.967473                | -2.243781 | 0.832387  |
| 5                | 6                | 0              | 1.736206                | -2.442218 | -1.225349 |
| 6                | 1                | 0              | 2.180841                | -3.433535 | -1.078190 |
| 7                | 1                | 0              | 0.992740                | -2.519442 | -2.024395 |
| 8                | 6                | 0              | -0.296762               | -2.598327 | 0.241986  |
| 9                | 1                | 0              | -0.714295               | -2.864211 | -0.730868 |
| 10               | 1                | 0              | -0.189421               | -3.526379 | 0.814285  |
| 11               | 26               | 0              | 0.655934                | 0.003177  | -0.370292 |
| 12               | 6                | 0              | 1.949688                | -0.890504 | 2.100807  |
| 13               | 6                | 0              | 2.507631                | -0.943899 | 3.378429  |
| 14               | 6                | 0              | 1.551049                | 1.387903  | 2.311063  |
| 15               | 6                | 0              | 2.590252                | 0.226947  | 4.129606  |
| 16               | 1                | 0              | 2.878807                | -1.884481 | 3.772897  |
| 17               | 6                | 0              | 2.110934                | 1.419102  | 3.581436  |
| 18               | 1                | 0              | 1.155487                | 2.287328  | 1.851429  |
| 19               | 1                | 0              | 3.023722                | 0.210732  | 5.124539  |
| 20               | 1                | 0              | 2.163631                | 2.353766  | 4.128386  |
| 21               | 6                | 0              | 2.778538                | -1.415540 | -1.600190 |
| 22               | 6                | 0              | 3.964985                | -1.728446 | -2.255484 |
| 23               | 6                | 0              | 4.861499                | -0.704166 | -2.565269 |
| 24               | 1                | 0              | 4.183596                | -2.758467 | -2.517598 |
| 25               | 6                | 0              | 3.350793                | 0.841409  | -1.528248 |
| 26               | 6                | 0              | 4.553487                | 0.601299  | -2.183933 |
| 27               | 1                | 0              | 5.789690                | -0.925223 | -3.082256 |
| 28               | 1                | 0              | 3.083879                | 1.839031  | -1.199905 |
| 29               | 1                | 0              | 5.230273                | 1.424044  | -2.385042 |
| 30               | 7                | 0              | 1.462310                | 0.255201  | 1.580762  |
| 31               | 7                | 0              | 2.469958                | -0.139347 | -1.253564 |
| 32               | 6                | 0              | -1.215714               | -1.614769 | 0.965920  |
| 33               | 1                | 0              | -2.211178               | -2.044660 | 1.110997  |
| 34               | 1                | 0              | -0.817054               | -1.369393 | 1.953470  |
| 35               | 7                | 0              | -1.283290               | -0.354982 | 0.159793  |
| 36               | 6                | 0              | -1.642937               | 0.855724  | 0.956044  |
| 37               | 1                | 0              | -2.720687               | 0.903471  | 1.136566  |
| 38               | 1                | 0              | -1.148481               | 0.789376  | 1.929527  |

|    |   |   |           |           |           |
|----|---|---|-----------|-----------|-----------|
| 39 | 6 | 0 | -2.249064 | -0.498659 | -1.033457 |
| 40 | 1 | 0 | -2.133175 | 0.415782  | -1.616225 |
| 41 | 1 | 0 | -1.862687 | -1.312856 | -1.646460 |
| 42 | 6 | 0 | -3.697447 | -0.735257 | -0.679409 |
| 43 | 6 | 0 | -4.586746 | 0.344177  | -0.546453 |
| 44 | 6 | 0 | -4.198732 | -2.039697 | -0.535010 |
| 45 | 6 | 0 | -5.930615 | 0.128048  | -0.240683 |
| 46 | 1 | 0 | -4.234880 | 1.359130  | -0.717492 |
| 47 | 6 | 0 | -5.542084 | -2.257996 | -0.228665 |
| 48 | 1 | 0 | -3.546106 | -2.895074 | -0.696074 |
| 49 | 6 | 0 | -6.407992 | -1.173526 | -0.073169 |
| 50 | 1 | 0 | -6.607667 | 0.971541  | -0.150252 |
| 51 | 1 | 0 | -5.916036 | -3.271923 | -0.128406 |
| 52 | 1 | 0 | -7.454841 | -1.343039 | 0.157452  |
| 53 | 6 | 0 | -1.159761 | 2.073872  | 0.198460  |
| 54 | 6 | 0 | -1.813242 | 3.302406  | 0.235310  |
| 55 | 6 | 0 | -1.313250 | 4.364381  | -0.520450 |
| 56 | 1 | 0 | -2.706913 | 3.419848  | 0.839521  |
| 57 | 6 | 0 | 0.414124  | 2.899761  | -1.307452 |
| 58 | 6 | 0 | -0.187024 | 4.154145  | -1.315342 |
| 59 | 1 | 0 | -1.807804 | 5.330291  | -0.505457 |
| 60 | 1 | 0 | 1.270323  | 2.688071  | -1.936325 |
| 61 | 1 | 0 | 0.217376  | 4.940346  | -1.942909 |
| 62 | 7 | 0 | -0.039851 | 1.883664  | -0.548271 |
| 63 | 1 | 0 | 0.206251  | -0.183397 | -1.772781 |

-----  
Fe<sup>III</sup>-H 2''<sub>F</sub> (sextet) E(B3LYP/ SDD-6-31G(d,p))= -1444.18590860 hartree  
-----

| Center<br>Number | Atomic<br>Number | Atomic<br>Type | Coordinates (Angstroms) |           |           |
|------------------|------------------|----------------|-------------------------|-----------|-----------|
|                  |                  |                | X                       | Y         | Z         |
| 1                | 7                | 0              | 1.122641                | -1.872169 | 0.402347  |
| 2                | 6                | 0              | 1.937178                | -1.692489 | 1.641543  |
| 3                | 1                | 0              | 1.616616                | -2.409953 | 2.405478  |
| 4                | 1                | 0              | 2.977104                | -1.942414 | 1.406151  |
| 5                | 6                | 0              | 1.900560                | -2.612822 | -0.632954 |
| 6                | 1                | 0              | 2.298822                | -3.553531 | -0.233480 |
| 7                | 1                | 0              | 1.216615                | -2.859860 | -1.451469 |
| 8                | 6                | 0              | -0.209414               | -2.488204 | 0.682312  |
| 9                | 1                | 0              | -0.577729               | -2.920979 | -0.249908 |
| 10               | 1                | 0              | -0.116035               | -3.308048 | 1.404937  |
| 11               | 26               | 0              | 0.708826                | 0.076832  | -0.602643 |
| 12               | 6                | 0              | 1.931033                | -0.289963 | 2.213869  |
| 13               | 6                | 0              | 2.388068                | -0.061227 | 3.513789  |

|    |   |   |           |           |           |
|----|---|---|-----------|-----------|-----------|
| 14 | 6 | 0 | 1.635717  | 1.986566  | 1.867686  |
| 15 | 6 | 0 | 2.476847  | 1.247158  | 3.982698  |
| 16 | 1 | 0 | 2.677302  | -0.897051 | 4.143217  |
| 17 | 6 | 0 | 2.100474  | 2.295085  | 3.138703  |
| 18 | 1 | 0 | 1.319580  | 2.767970  | 1.184751  |
| 19 | 1 | 0 | 2.834245  | 1.446950  | 4.987905  |
| 20 | 1 | 0 | 2.159642  | 3.328979  | 3.459897  |
| 21 | 6 | 0 | 3.016785  | -1.743863 | -1.174811 |
| 22 | 6 | 0 | 4.212808  | -2.276405 | -1.649863 |
| 23 | 6 | 0 | 5.170164  | -1.418385 | -2.193682 |
| 24 | 1 | 0 | 4.389667  | -3.345938 | -1.599402 |
| 25 | 6 | 0 | 3.702089  | 0.413572  | -1.723897 |
| 26 | 6 | 0 | 4.912091  | -0.047579 | -2.229739 |
| 27 | 1 | 0 | 6.105309  | -1.814161 | -2.576720 |
| 28 | 1 | 0 | 3.465346  | 1.473443  | -1.724370 |
| 29 | 1 | 0 | 5.632181  | 0.653483  | -2.636470 |
| 30 | 7 | 0 | 1.547050  | 0.718970  | 1.407519  |
| 31 | 7 | 0 | 2.771751  | -0.414096 | -1.211956 |
| 32 | 6 | 0 | -1.187026 | -1.434998 | 1.200900  |
| 33 | 1 | 0 | -2.152566 | -1.895751 | 1.433600  |
| 34 | 1 | 0 | -0.808940 | -0.991411 | 2.126062  |
| 35 | 7 | 0 | -1.343448 | -0.349842 | 0.190981  |
| 36 | 6 | 0 | -1.766170 | 0.943001  | 0.793194  |
| 37 | 1 | 0 | -2.837366 | 0.942276  | 1.019211  |
| 38 | 1 | 0 | -1.232452 | 1.070080  | 1.740900  |
| 39 | 6 | 0 | -2.276769 | -0.749468 | -0.954893 |
| 40 | 1 | 0 | -2.228027 | 0.065445  | -1.680189 |
| 41 | 1 | 0 | -1.822937 | -1.615494 | -1.437811 |
| 42 | 6 | 0 | -3.707464 | -1.039094 | -0.565228 |
| 43 | 6 | 0 | -4.677294 | -0.023609 | -0.590399 |
| 44 | 6 | 0 | -4.106723 | -2.340609 | -0.219502 |
| 45 | 6 | 0 | -6.002146 | -0.293717 | -0.246091 |
| 46 | 1 | 0 | -4.404044 | 0.977347  | -0.916944 |
| 47 | 6 | 0 | -5.430637 | -2.612623 | 0.126332  |
| 48 | 1 | 0 | -3.388826 | -3.157288 | -0.253579 |
| 49 | 6 | 0 | -6.378526 | -1.587296 | 0.121165  |
| 50 | 1 | 0 | -6.742945 | 0.498846  | -0.280845 |
| 51 | 1 | 0 | -5.725402 | -3.625331 | 0.382335  |
| 52 | 1 | 0 | -7.410279 | -1.799845 | 0.382144  |
| 53 | 6 | 0 | -1.418477 | 2.093608  | -0.129075 |
| 54 | 6 | 0 | -2.213262 | 3.231459  | -0.244631 |
| 55 | 6 | 0 | -1.814973 | 4.259619  | -1.101358 |
| 56 | 1 | 0 | -3.134038 | 3.306816  | 0.324346  |
| 57 | 6 | 0 | 0.106956  | 2.954930  | -1.678444 |



|    |   |   |           |           |           |
|----|---|---|-----------|-----------|-----------|
| 58 | 6 | 0 | -0.636680 | 4.117512  | -1.836626 |
| 59 | 1 | 0 | -2.423752 | 5.152369  | -1.204355 |
| 60 | 1 | 0 | 1.019175  | 2.791108  | -2.244174 |
| 61 | 1 | 0 | -0.303108 | 4.884752  | -2.526143 |
| 62 | 7 | 0 | -0.264985 | 1.971571  | -0.831601 |
| 63 | 1 | 0 | 0.345066  | -0.582445 | -2.083373 |

-----

$2''_{dp}$  (quartet) E(B3LYP/ SDD-6-31G(d,p))= -1443.92243105 hartree

-----

| Center<br>Number | Atomic<br>Number | Atomic<br>Type | Coordinates (Angstroms) |           |           |
|------------------|------------------|----------------|-------------------------|-----------|-----------|
|                  |                  |                | X                       | Y         | Z         |
| 1                | 7                | 0              | -1.339693               | -1.489384 | -1.189977 |
| 2                | 6                | 0              | -2.223372               | -0.956729 | -2.241261 |
| 3                | 1                | 0              | -1.599103               | -0.424602 | -2.967583 |
| 4                | 1                | 0              | -2.738604               | -1.755737 | -2.796265 |
| 5                | 6                | 0              | -2.018130               | -2.502848 | -0.364406 |
| 6                | 1                | 0              | -3.077167               | -2.224926 | -0.308780 |
| 7                | 1                | 0              | -1.975968               | -3.506081 | -0.815065 |
| 8                | 6                | 0              | -0.026987               | -1.936890 | -1.695049 |
| 9                | 1                | 0              | 0.412048                | -2.587918 | -0.932975 |
| 10               | 1                | 0              | -0.125923               | -2.545592 | -2.608192 |
| 11               | 26               | 0              | -0.924160               | 0.317592  | 0.238150  |
| 12               | 6                | 0              | -3.229354               | 0.021593  | -1.671282 |
| 13               | 6                | 0              | -4.518430               | 0.131757  | -2.180383 |
| 14               | 6                | 0              | -3.626875               | 1.741593  | -0.164612 |
| 15               | 6                | 0              | -5.390171               | 1.088758  | -1.652804 |
| 16               | 1                | 0              | -4.836384               | -0.526341 | -2.983297 |
| 17               | 6                | 0              | -4.928292               | 1.908757  | -0.622721 |
| 18               | 1                | 0              | -3.228309               | 2.375546  | 0.621694  |
| 19               | 1                | 0              | -6.399577               | 1.189508  | -2.037330 |
| 20               | 1                | 0              | -5.560764               | 2.671179  | -0.180923 |
| 21               | 6                | 0              | -1.473313               | -2.534276 | 1.048156  |
| 22               | 6                | 0              | -1.376334               | -3.715970 | 1.775520  |
| 23               | 6                | 0              | -0.927678               | -3.674290 | 3.099315  |
| 24               | 1                | 0              | -1.651902               | -4.657882 | 1.311544  |
| 25               | 6                | 0              | -0.709510               | -1.300156 | 2.858214  |
| 26               | 6                | 0              | -0.589132               | -2.439380 | 3.648969  |
| 27               | 1                | 0              | -0.846133               | -4.585404 | 3.683015  |
| 28               | 1                | 0              | -0.461126               | -0.319185 | 3.252013  |
| 29               | 1                | 0              | -0.238845               | -2.352104 | 4.671728  |
| 30               | 7                | 0              | -2.778704               | 0.810923  | -0.660949 |
| 31               | 7                | 0              | -1.136474               | -1.331105 | 1.576762  |

|    |   |   |           |           |           |
|----|---|---|-----------|-----------|-----------|
| 32 | 6 | 0 | 0.914605  | -0.758389 | -1.978378 |
| 33 | 1 | 0 | 1.863921  | -1.141576 | -2.374839 |
| 34 | 1 | 0 | 0.485641  | -0.127389 | -2.761704 |
| 35 | 7 | 0 | 1.114527  | 0.088012  | -0.781098 |
| 36 | 6 | 0 | 1.402320  | 1.503178  | -1.114769 |
| 37 | 1 | 0 | 2.431181  | 1.652215  | -1.466037 |
| 38 | 1 | 0 | 0.734626  | 1.781983  | -1.939370 |
| 39 | 6 | 0 | 2.113698  | -0.482632 | 0.185808  |
| 40 | 1 | 0 | 2.062357  | 0.137531  | 1.085428  |
| 41 | 1 | 0 | 1.750832  | -1.474535 | 0.468000  |
| 42 | 6 | 0 | 3.549256  | -0.576521 | -0.294024 |
| 43 | 6 | 0 | 4.444566  | 0.484775  | -0.089422 |
| 44 | 6 | 0 | 4.021459  | -1.733843 | -0.931958 |
| 45 | 6 | 0 | 5.764482  | 0.403950  | -0.534954 |
| 46 | 1 | 0 | 4.111199  | 1.372642  | 0.442434  |
| 47 | 6 | 0 | 5.340616  | -1.818013 | -1.379692 |
| 48 | 1 | 0 | 3.359715  | -2.587449 | -1.059798 |
| 49 | 6 | 0 | 6.213508  | -0.745875 | -1.187172 |
| 50 | 1 | 0 | 6.444842  | 1.232645  | -0.362915 |
| 51 | 1 | 0 | 5.689220  | -2.723438 | -1.867245 |
| 52 | 1 | 0 | 7.241420  | -0.811690 | -1.530195 |
| 53 | 6 | 0 | 1.115598  | 2.415703  | 0.060566  |
| 54 | 6 | 0 | 1.899414  | 3.533799  | 0.331371  |
| 55 | 6 | 0 | 1.572646  | 4.364733  | 1.405308  |
| 56 | 1 | 0 | 2.759488  | 3.747520  | -0.295652 |
| 57 | 6 | 0 | -0.274152 | 2.905114  | 1.860364  |
| 58 | 6 | 0 | 0.463148  | 4.034966  | 2.187282  |
| 59 | 1 | 0 | 2.171738  | 5.241085  | 1.629040  |
| 60 | 1 | 0 | -1.145065 | 2.621639  | 2.444341  |
| 61 | 1 | 0 | 0.170697  | 4.641860  | 3.037320  |
| 62 | 7 | 0 | 0.026430  | 2.100401  | 0.812661  |

-----  
**2''<sub>dp</sub>** (doublet) E(B3LYP/ SDD-6-31G(d,p))= -1443.89469477 hartree

| Center<br>Number | Atomic<br>Number | Atomic<br>Type | Coordinates (Angstroms) |           |           |
|------------------|------------------|----------------|-------------------------|-----------|-----------|
|                  |                  |                | X                       | Y         | Z         |
| 1                | 7                | 0              | -1.194795               | -1.626225 | -1.029843 |
| 2                | 6                | 0              | -2.211558               | -1.372153 | -2.081139 |
| 3                | 1                | 0              | -1.702014               | -0.899714 | -2.928927 |
| 4                | 1                | 0              | -2.660178               | -2.304224 | -2.454360 |
| 5                | 6                | 0              | -1.716714               | -2.574567 | -0.007213 |
| 6                | 1                | 0              | -2.793787               | -2.396338 | 0.078185  |

|    |    |   |           |           |           |
|----|----|---|-----------|-----------|-----------|
| 7  | 1  | 0 | -1.583858 | -3.618429 | -0.322254 |
| 8  | 6  | 0 | 0.119949  | -2.067133 | -1.579858 |
| 9  | 1  | 0 | 0.621004  | -2.642584 | -0.797025 |
| 10 | 1  | 0 | -0.010296 | -2.741060 | -2.438259 |
| 11 | 26 | 0 | -0.896136 | 0.186470  | -0.133012 |
| 12 | 6  | 0 | -3.267200 | -0.428279 | -1.548667 |
| 13 | 6  | 0 | -4.566737 | -0.413109 | -2.040764 |
| 14 | 6  | 0 | -3.720692 | 1.353388  | -0.137308 |
| 15 | 6  | 0 | -5.471053 | 0.539201  | -1.565427 |
| 16 | 1  | 0 | -4.863943 | -1.135672 | -2.794624 |
| 17 | 6  | 0 | -5.028794 | 1.441263  | -0.598018 |
| 18 | 1  | 0 | -3.353873 | 2.036597  | 0.619211  |
| 19 | 1  | 0 | -6.488713 | 0.572951  | -1.939396 |
| 20 | 1  | 0 | -5.687363 | 2.202610  | -0.193988 |
| 21 | 6  | 0 | -1.089630 | -2.319586 | 1.344837  |
| 22 | 6  | 0 | -0.880038 | -3.333749 | 2.274029  |
| 23 | 6  | 0 | -0.384446 | -3.008112 | 3.539510  |
| 24 | 1  | 0 | -1.110038 | -4.362671 | 2.014397  |
| 25 | 6  | 0 | -0.333587 | -0.716288 | 2.830254  |
| 26 | 6  | 0 | -0.112746 | -1.669488 | 3.820404  |
| 27 | 1  | 0 | -0.216438 | -3.780140 | 4.283099  |
| 28 | 1  | 0 | -0.122833 | 0.333778  | 3.010392  |
| 29 | 1  | 0 | 0.269668  | -1.362878 | 4.788230  |
| 30 | 7  | 0 | -2.832487 | 0.436464  | -0.586596 |
| 31 | 7  | 0 | -0.809297 | -1.017663 | 1.604600  |
| 32 | 6  | 0 | 0.980397  | -0.863200 | -1.975291 |
| 33 | 1  | 0 | 1.957687  | -1.203426 | -2.340218 |
| 34 | 1  | 0 | 0.504664  | -0.322232 | -2.798604 |
| 35 | 7  | 0 | 1.100892  | 0.076860  | -0.828525 |
| 36 | 6  | 0 | 1.303545  | 1.493600  | -1.236937 |
| 37 | 1  | 0 | 2.345501  | 1.714347  | -1.497301 |
| 38 | 1  | 0 | 0.697518  | 1.664311  | -2.134965 |
| 39 | 6  | 0 | 2.123716  | -0.358933 | 0.189522  |
| 40 | 1  | 0 | 2.012654  | 0.321065  | 1.037371  |
| 41 | 1  | 0 | 1.819152  | -1.346749 | 0.541305  |
| 42 | 6  | 0 | 3.567670  | -0.389526 | -0.268980 |
| 43 | 6  | 0 | 4.392338  | 0.735699  | -0.114312 |
| 44 | 6  | 0 | 4.122002  | -1.549827 | -0.831289 |
| 45 | 6  | 0 | 5.722095  | 0.713044  | -0.536606 |
| 46 | 1  | 0 | 3.996240  | 1.629138  | 0.362738  |
| 47 | 6  | 0 | 5.451150  | -1.576174 | -1.255696 |
| 48 | 1  | 0 | 3.517932  | -2.450416 | -0.916127 |
| 49 | 6  | 0 | 6.252358  | -0.441711 | -1.114878 |
| 50 | 1  | 0 | 6.346632  | 1.591330  | -0.403688 |

|    |   |   |           |           |           |
|----|---|---|-----------|-----------|-----------|
| 51 | 1 | 0 | 5.863897  | -2.484587 | -1.683988 |
| 52 | 1 | 0 | 7.287995  | -0.462408 | -1.439789 |
| 53 | 6 | 0 | 0.808461  | 2.402601  | -0.135038 |
| 54 | 6 | 0 | 1.419165  | 3.608492  | 0.189157  |
| 55 | 6 | 0 | 0.877583  | 4.405958  | 1.200621  |
| 56 | 1 | 0 | 2.308778  | 3.919597  | -0.349509 |
| 57 | 6 | 0 | -0.811773 | 2.726151  | 1.497800  |
| 58 | 6 | 0 | -0.256977 | 3.946733  | 1.868278  |
| 59 | 1 | 0 | 1.335521  | 5.353431  | 1.464117  |
| 60 | 1 | 0 | -1.683656 | 2.330686  | 2.008387  |
| 61 | 1 | 0 | -0.709878 | 4.519308  | 2.670545  |
| 62 | 7 | 0 | -0.311362 | 1.954906  | 0.504853  |

-----  
**3''<sub>A</sub>** (quintet) E(B3LYP/ SDD-6-31G(d,p))= -1444.81658160 hartree

| Center<br>Number | Atomic<br>Number | Atomic<br>Type | Coordinates (Angstroms) |           |           |
|------------------|------------------|----------------|-------------------------|-----------|-----------|
|                  |                  |                | X                       | Y         | Z         |
| 1                | 7                | 0              | -1.788020               | -1.001559 | -1.208802 |
| 2                | 6                | 0              | -2.559850               | -0.221675 | -2.203327 |
| 3                | 1                | 0              | -1.857652               | 0.259828  | -2.891626 |
| 4                | 1                | 0              | -3.198920               | -0.869636 | -2.817753 |
| 5                | 6                | 0              | -2.644244               | -2.041226 | -0.584520 |
| 6                | 1                | 0              | -3.667205               | -1.649113 | -0.545123 |
| 7                | 1                | 0              | -2.679229               | -2.950526 | -1.199110 |
| 8                | 6                | 0              | -0.537839               | -1.578384 | -1.761628 |
| 9                | 1                | 0              | -0.214532               | -2.371091 | -1.082323 |
| 10               | 1                | 0              | -0.716275               | -2.053624 | -2.737066 |
| 11               | 26               | 0              | -1.124612               | 0.421880  | 0.443997  |
| 12               | 6                | 0              | -3.385460               | 0.858306  | -1.529722 |
| 13               | 6                | 0              | -4.565992               | 1.345777  | -2.085751 |
| 14               | 6                | 0              | -3.536572               | 2.365097  | 0.240333  |
| 15               | 6                | 0              | -5.237314               | 2.388050  | -1.444523 |
| 16               | 1                | 0              | -4.952600               | 0.918315  | -3.005381 |
| 17               | 6                | 0              | -4.713519               | 2.909444  | -0.260666 |
| 18               | 1                | 0              | -3.090218               | 2.726216  | 1.161894  |
| 19               | 1                | 0              | -6.158610               | 2.782681  | -1.861231 |
| 20               | 1                | 0              | -5.207959               | 3.715583  | 0.269455  |
| 21               | 6                | 0              | -2.220241               | -2.366577 | 0.832677  |
| 22               | 6                | 0              | -2.489832               | -3.602002 | 1.418269  |
| 23               | 6                | 0              | -2.172463               | -3.797938 | 2.762931  |
| 24               | 1                | 0              | -2.947762               | -4.393573 | 0.833817  |
| 25               | 6                | 0              | -1.340821               | -1.553319 | 2.828536  |

|    |   |   |           |           |           |
|----|---|---|-----------|-----------|-----------|
| 26 | 6 | 0 | -1.591410 | -2.753433 | 3.483919  |
| 27 | 1 | 0 | -2.377505 | -4.751049 | 3.240056  |
| 28 | 1 | 0 | -0.889158 | -0.708851 | 3.339802  |
| 29 | 1 | 0 | -1.335903 | -2.863726 | 4.531758  |
| 30 | 7 | 0 | -2.883087 | 1.361588  | -0.380415 |
| 31 | 7 | 0 | -1.642958 | -1.362976 | 1.528019  |
| 32 | 6 | 0 | 0.561429  | -0.530838 | -1.924342 |
| 33 | 1 | 0 | 1.432371  | -0.998216 | -2.398841 |
| 34 | 1 | 0 | 0.219560  | 0.255282  | -2.603719 |
| 35 | 7 | 0 | 0.961313  | 0.135580  | -0.642494 |
| 36 | 6 | 0 | 1.723945  | 1.358561  | -1.040686 |
| 37 | 1 | 0 | 2.543146  | 1.080023  | -1.714515 |
| 38 | 1 | 0 | 1.038424  | 1.990229  | -1.619270 |
| 39 | 6 | 0 | 1.785620  | -0.787617 | 0.243149  |
| 40 | 1 | 0 | 2.001013  | -0.223973 | 1.154635  |
| 41 | 1 | 0 | 1.117964  | -1.600957 | 0.536844  |
| 42 | 6 | 0 | 3.066032  | -1.352103 | -0.339144 |
| 43 | 6 | 0 | 4.296882  | -0.713188 | -0.123870 |
| 44 | 6 | 0 | 3.057431  | -2.556038 | -1.062735 |
| 45 | 6 | 0 | 5.479139  | -1.241379 | -0.644086 |
| 46 | 1 | 0 | 4.339832  | 0.185787  | 0.484982  |
| 47 | 6 | 0 | 4.237051  | -3.085838 | -1.586339 |
| 48 | 1 | 0 | 2.127899  | -3.104474 | -1.196531 |
| 49 | 6 | 0 | 5.450095  | -2.424811 | -1.384011 |
| 50 | 1 | 0 | 6.424115  | -0.740706 | -0.457370 |
| 51 | 1 | 0 | 4.211770  | -4.020564 | -2.137442 |
| 52 | 1 | 0 | 6.369660  | -2.840157 | -1.783586 |
| 53 | 6 | 0 | 2.333174  | 2.233823  | 0.038101  |
| 54 | 6 | 0 | 3.572002  | 2.845803  | -0.149445 |
| 55 | 6 | 0 | 4.061804  | 3.740364  | 0.804821  |
| 56 | 1 | 0 | 4.147589  | 2.622260  | -1.040609 |
| 57 | 6 | 0 | 2.093963  | 3.377835  | 2.107643  |
| 58 | 6 | 0 | 3.316023  | 4.011203  | 1.955296  |
| 59 | 1 | 0 | 5.023751  | 4.219618  | 0.652231  |
| 60 | 1 | 0 | 1.445067  | 3.521623  | 2.964715  |
| 61 | 1 | 0 | 3.671913  | 4.695720  | 2.716394  |
| 62 | 7 | 0 | 1.642647  | 2.530450  | 1.161036  |
| 63 | 1 | 0 | 0.675293  | 2.070658  | 1.322408  |
| 64 | 1 | 0 | -0.519387 | 1.518577  | 1.591905  |

-----  
**3''<sub>A</sub>** (singlet) E(B3LYP/ SDD-6-31G(d,p))= -1444.77999292hartree  
 -----

| Center | Atomic | Atomic | Coordinates (Angstroms) |
|--------|--------|--------|-------------------------|
|--------|--------|--------|-------------------------|

| Number | Number | Type | X         | Y         | Z         |
|--------|--------|------|-----------|-----------|-----------|
| 1      | 7      | 0    | -1.665376 | -1.412911 | -0.982592 |
| 2      | 6      | 0    | -2.673624 | -1.063481 | -2.020678 |
| 3      | 1      | 0    | -2.143000 | -0.659169 | -2.891003 |
| 4      | 1      | 0    | -3.225546 | -1.946639 | -2.368265 |
| 5      | 6      | 0    | -2.285238 | -2.241241 | 0.094768  |
| 6      | 1      | 0    | -3.365352 | -2.062357 | 0.084983  |
| 7      | 1      | 0    | -2.142677 | -3.311111 | -0.096541 |
| 8      | 6      | 0    | -0.430282 | -2.042115 | -1.528998 |
| 9      | 1      | 0    | -0.026240 | -2.703199 | -0.759767 |
| 10     | 1      | 0    | -0.653090 | -2.669895 | -2.401160 |
| 11     | 26     | 0    | -1.150059 | 0.404833  | -0.148996 |
| 12     | 6      | 0    | -3.613580 | -0.014944 | -1.455617 |
| 13     | 6      | 0    | -4.920110 | 0.152217  | -1.902712 |
| 14     | 6      | 0    | -3.841700 | 1.745847  | 0.055672  |
| 15     | 6      | 0    | -5.701747 | 1.164825  | -1.342716 |
| 16     | 1      | 0    | -5.319856 | -0.498077 | -2.674037 |
| 17     | 6      | 0    | -5.153619 | 1.972602  | -0.346193 |
| 18     | 1      | 0    | -3.365060 | 2.343946  | 0.823086  |
| 19     | 1      | 0    | -6.723431 | 1.315096  | -1.676435 |
| 20     | 1      | 0    | -5.729542 | 2.766307  | 0.116171  |
| 21     | 6      | 0    | -1.758211 | -1.841237 | 1.452028  |
| 22     | 6      | 0    | -1.835129 | -2.676910 | 2.563907  |
| 23     | 6      | 0    | -1.430612 | -2.193076 | 3.807655  |
| 24     | 1      | 0    | -2.215865 | -3.687499 | 2.456240  |
| 25     | 6      | 0    | -0.895612 | -0.110700 | 2.745083  |
| 26     | 6      | 0    | -0.960095 | -0.882618 | 3.899139  |
| 27     | 1      | 0    | -1.486125 | -2.825107 | 4.687961  |
| 28     | 1      | 0    | -0.538294 | 0.911617  | 2.761749  |
| 29     | 1      | 0    | -0.645801 | -0.460831 | 4.847225  |
| 30     | 7      | 0    | -3.080851 | 0.772564  | -0.485316 |
| 31     | 7      | 0    | -1.278216 | -0.577447 | 1.538547  |
| 32     | 6      | 0    | 0.591726  | -0.978138 | -1.908948 |
| 33     | 1      | 0    | 1.501730  | -1.452648 | -2.294205 |
| 34     | 1      | 0    | 0.190614  | -0.360100 | -2.720204 |
| 35     | 7      | 0    | 0.912215  | -0.054576 | -0.763652 |
| 36     | 6      | 0    | 1.670774  | 1.083274  | -1.379423 |
| 37     | 1      | 0    | 2.551665  | 0.695895  | -1.903183 |
| 38     | 1      | 0    | 1.019567  | 1.532186  | -2.139738 |
| 39     | 6      | 0    | 1.743311  | -0.748505 | 0.308424  |
| 40     | 1      | 0    | 1.874166  | -0.013855 | 1.106631  |
| 41     | 1      | 0    | 1.111263  | -1.537168 | 0.718239  |
| 42     | 6      | 0    | 3.086640  | -1.315948 | -0.105343 |

|    |   |   |           |           |           |
|----|---|---|-----------|-----------|-----------|
| 43 | 6 | 0 | 4.269012  | -0.597899 | 0.132427  |
| 44 | 6 | 0 | 3.189985  | -2.597551 | -0.672059 |
| 45 | 6 | 0 | 5.512629  | -1.125551 | -0.218236 |
| 46 | 1 | 0 | 4.222316  | 0.366988  | 0.630067  |
| 47 | 6 | 0 | 4.430661  | -3.126479 | -1.028465 |
| 48 | 1 | 0 | 2.300604  | -3.207338 | -0.810668 |
| 49 | 6 | 0 | 5.594827  | -2.387378 | -0.809468 |
| 50 | 1 | 0 | 6.417341  | -0.561272 | -0.014209 |
| 51 | 1 | 0 | 4.490226  | -4.120622 | -1.459973 |
| 52 | 1 | 0 | 6.561246  | -2.801629 | -1.078115 |
| 53 | 6 | 0 | 2.145284  | 2.204076  | -0.477559 |
| 54 | 6 | 0 | 3.413434  | 2.767213  | -0.605678 |
| 55 | 6 | 0 | 3.757105  | 3.884164  | 0.160357  |
| 56 | 1 | 0 | 4.121882  | 2.334917  | -1.303200 |
| 57 | 6 | 0 | 1.585311  | 3.830379  | 1.156424  |
| 58 | 6 | 0 | 2.833342  | 4.425003  | 1.058936  |
| 59 | 1 | 0 | 4.741597  | 4.329324  | 0.055870  |
| 60 | 1 | 0 | 0.803752  | 4.186070  | 1.819007  |
| 61 | 1 | 0 | 3.071725  | 5.290114  | 1.666704  |
| 62 | 7 | 0 | 1.281422  | 2.760382  | 0.397254  |
| 63 | 1 | 0 | 0.282368  | 2.316171  | 0.459112  |
| 64 | 1 | 0 | -0.911881 | 1.833182  | 0.505514  |

-----  
**3''<sub>A</sub>** (triplet) E(B3LYP/ SDD-6-31G(d,p))= -1444.80601258 hartree  
 -----

| Center<br>Number | Atomic<br>Number | Atomic<br>Type | Coordinates (Angstroms) |           |           |
|------------------|------------------|----------------|-------------------------|-----------|-----------|
|                  |                  |                | X                       | Y         | Z         |
| 1                | 7                | 0              | -1.718277               | -1.094380 | -1.188290 |
| 2                | 6                | 0              | -2.517203               | -0.337922 | -2.195017 |
| 3                | 1                | 0              | -1.829230               | 0.105996  | -2.921155 |
| 4                | 1                | 0              | -3.178040               | -1.006544 | -2.760236 |
| 5                | 6                | 0              | -2.555504               | -2.159299 | -0.562242 |
| 6                | 1                | 0              | -3.575241               | -1.767207 | -0.471999 |
| 7                | 1                | 0              | -2.609037               | -3.047729 | -1.204321 |
| 8                | 6                | 0              | -0.472382               | -1.665407 | -1.774864 |
| 9                | 1                | 0              | -0.122672               | -2.449041 | -1.098529 |
| 10               | 1                | 0              | -0.674823               | -2.144019 | -2.742800 |
| 11               | 26               | 0              | -1.141108               | 0.211721  | 0.335038  |
| 12               | 6                | 0              | -3.295043               | 0.773534  | -1.528348 |
| 13               | 6                | 0              | -4.480545               | 1.283885  | -2.048519 |
| 14               | 6                | 0              | -3.333403               | 2.311161  | 0.221182  |
| 15               | 6                | 0              | -5.096735               | 2.356692  | -1.401301 |
| 16               | 1                | 0              | -4.914923               | 0.850986  | -2.943790 |

|    |   |   |           |           |           |
|----|---|---|-----------|-----------|-----------|
| 17 | 6 | 0 | -4.512803 | 2.879825  | -0.247651 |
| 18 | 1 | 0 | -2.848111 | 2.665169  | 1.123396  |
| 19 | 1 | 0 | -6.021551 | 2.771472  | -1.789421 |
| 20 | 1 | 0 | -4.964065 | 3.707443  | 0.287874  |
| 21 | 6 | 0 | -2.056493 | -2.502652 | 0.821626  |
| 22 | 6 | 0 | -2.292256 | -3.736143 | 1.422745  |
| 23 | 6 | 0 | -1.888299 | -3.930719 | 2.744687  |
| 24 | 1 | 0 | -2.790629 | -4.526471 | 0.870825  |
| 25 | 6 | 0 | -1.050054 | -1.685403 | 2.754262  |
| 26 | 6 | 0 | -1.261107 | -2.885785 | 3.424110  |
| 27 | 1 | 0 | -2.064496 | -4.882210 | 3.236188  |
| 28 | 1 | 0 | -0.571411 | -0.840597 | 3.236647  |
| 29 | 1 | 0 | -0.940663 | -2.994547 | 4.454115  |
| 30 | 7 | 0 | -2.729013 | 1.280528  | -0.406057 |
| 31 | 7 | 0 | -1.431430 | -1.495400 | 1.475009  |
| 32 | 6 | 0 | 0.592831  | -0.590600 | -1.950628 |
| 33 | 1 | 0 | 1.494402  | -1.033684 | -2.389228 |
| 34 | 1 | 0 | 0.240968  | 0.166330  | -2.656988 |
| 35 | 7 | 0 | 0.912593  | 0.110287  | -0.663978 |
| 36 | 6 | 0 | 1.581680  | 1.390603  | -1.035697 |
| 37 | 1 | 0 | 2.476641  | 1.187415  | -1.636372 |
| 38 | 1 | 0 | 0.885855  | 1.946883  | -1.675720 |
| 39 | 6 | 0 | 1.805656  | -0.746547 | 0.227686  |
| 40 | 1 | 0 | 1.954241  | -0.176544 | 1.148266  |
| 41 | 1 | 0 | 1.212612  | -1.621837 | 0.499392  |
| 42 | 6 | 0 | 3.139621  | -1.183976 | -0.341959 |
| 43 | 6 | 0 | 4.298613  | -0.419885 | -0.134645 |
| 44 | 6 | 0 | 3.254694  | -2.394105 | -1.045703 |
| 45 | 6 | 0 | 5.530238  | -0.835197 | -0.642417 |
| 46 | 1 | 0 | 4.247279  | 0.489514  | 0.458527  |
| 47 | 6 | 0 | 4.484081  | -2.811704 | -1.556201 |
| 48 | 1 | 0 | 2.384152  | -3.033646 | -1.173176 |
| 49 | 6 | 0 | 5.623440  | -2.028713 | -1.360956 |
| 50 | 1 | 0 | 6.419221  | -0.238545 | -0.463091 |
| 51 | 1 | 0 | 4.555676  | -3.753164 | -2.091523 |
| 52 | 1 | 0 | 6.582057  | -2.356282 | -1.750233 |
| 53 | 6 | 0 | 2.003187  | 2.324329  | 0.081017  |
| 54 | 6 | 0 | 3.150160  | 3.110151  | -0.024091 |
| 55 | 6 | 0 | 3.453958  | 4.037548  | 0.974822  |
| 56 | 1 | 0 | 3.797955  | 2.994125  | -0.885950 |
| 57 | 6 | 0 | 1.491131  | 3.362111  | 2.156485  |
| 58 | 6 | 0 | 2.615147  | 4.166997  | 2.086134  |
| 59 | 1 | 0 | 4.344451  | 4.652320  | 0.888751  |
| 60 | 1 | 0 | 0.785394  | 3.386380  | 2.979615  |



|    |   |   |           |          |          |
|----|---|---|-----------|----------|----------|
| 61 | 1 | 0 | 2.828387  | 4.872904 | 2.880311 |
| 62 | 7 | 0 | 1.218174  | 2.486057 | 1.167730 |
| 63 | 1 | 0 | 0.328916  | 1.880674 | 1.263135 |
| 64 | 1 | 0 | -0.804506 | 1.183380 | 1.538505 |

-----  
**3''<sub>B</sub>** (quinete) E(B3LYP/ SDD-6-31G(d,p))= -1444.81520364 hartree  
 -----

| Center<br>Number | Atomic<br>Number | Atomic<br>Type | Coordinates (Angstroms) |           |           |
|------------------|------------------|----------------|-------------------------|-----------|-----------|
|                  |                  |                | X                       | Y         | Z         |
| 1                | 7                | 0              | -1.607546               | -1.181132 | -0.574432 |
| 2                | 6                | 0              | -2.555427               | -1.129307 | -1.719271 |
| 3                | 1                | 0              | -2.039311               | -0.644958 | -2.555358 |
| 4                | 1                | 0              | -2.801922               | -2.147872 | -2.052378 |
| 5                | 6                | 0              | -2.226657               | -1.838837 | 0.598776  |
| 6                | 1                | 0              | -3.240374               | -1.438640 | 0.717489  |
| 7                | 1                | 0              | -2.337108               | -2.922258 | 0.444204  |
| 8                | 6                | 0              | -0.386728               | -1.924458 | -1.018030 |
| 9                | 1                | 0              | 0.060718                | -2.382419 | -0.133519 |
| 10               | 1                | 0              | -0.662561               | -2.750575 | -1.688697 |
| 11               | 26               | 0              | -0.533932               | 0.854197  | 0.314257  |
| 12               | 6                | 0              | -3.870102               | -0.406321 | -1.506169 |
| 13               | 6                | 0              | -5.086523               | -0.950759 | -1.909531 |
| 14               | 6                | 0              | -4.983542               | 1.585889  | -0.846799 |
| 15               | 6                | 0              | -6.261118               | -0.201830 | -1.785714 |
| 16               | 1                | 0              | -5.113696               | -1.951782 | -2.325725 |
| 17               | 6                | 0              | -6.213133               | 1.085961  | -1.247599 |
| 18               | 1                | 0              | -4.847530               | 2.570416  | -0.412380 |
| 19               | 1                | 0              | -7.207812               | -0.625245 | -2.106327 |
| 20               | 1                | 0              | -7.106121               | 1.690172  | -1.137744 |
| 21               | 6                | 0              | -1.478596               | -1.583235 | 1.894368  |
| 22               | 6                | 0              | -1.558219               | -2.495717 | 2.946419  |
| 23               | 6                | 0              | -0.946484               | -2.194548 | 4.162851  |
| 24               | 1                | 0              | -2.097625               | -3.428130 | 2.814356  |
| 25               | 6                | 0              | -0.210310               | -0.133340 | 3.198701  |
| 26               | 6                | 0              | -0.261990               | -0.985776 | 4.294285  |
| 27               | 1                | 0              | -1.002349               | -2.892296 | 4.992356  |
| 28               | 1                | 0              | 0.321355                | 0.811475  | 3.251895  |
| 29               | 1                | 0              | 0.226527                | -0.708655 | 5.221620  |
| 30               | 7                | 0              | -3.869130               | 0.843814  | -0.989415 |
| 31               | 7                | 0              | -0.801304               | -0.418731 | 2.017690  |
| 32               | 6                | 0              | 0.637760                | -1.026068 | -1.711828 |
| 33               | 1                | 0              | 1.434105                | -1.646226 | -2.139278 |

|    |   |   |           |           |           |
|----|---|---|-----------|-----------|-----------|
| 34 | 1 | 0 | 0.172298  | -0.490113 | -2.544580 |
| 35 | 7 | 0 | 1.191582  | -0.017739 | -0.770847 |
| 36 | 6 | 0 | 1.778539  | 1.149779  | -1.480407 |
| 37 | 1 | 0 | 2.746380  | 0.903681  | -1.930186 |
| 38 | 1 | 0 | 1.101284  | 1.421657  | -2.299108 |
| 39 | 6 | 0 | 2.201315  | -0.621716 | 0.197446  |
| 40 | 1 | 0 | 2.473347  | 0.181350  | 0.886410  |
| 41 | 1 | 0 | 1.666986  | -1.372229 | 0.783692  |
| 42 | 6 | 0 | 3.444515  | -1.226551 | -0.416399 |
| 43 | 6 | 0 | 4.599660  | -0.450738 | -0.604125 |
| 44 | 6 | 0 | 3.482453  | -2.584383 | -0.771827 |
| 45 | 6 | 0 | 5.750753  | -1.009080 | -1.161018 |
| 46 | 1 | 0 | 4.610191  | 0.589419  | -0.286538 |
| 47 | 6 | 0 | 4.632277  | -3.144803 | -1.329047 |
| 48 | 1 | 0 | 2.618505  | -3.219235 | -0.586542 |
| 49 | 6 | 0 | 5.766176  | -2.355415 | -1.530696 |
| 50 | 1 | 0 | 6.638728  | -0.398806 | -1.292404 |
| 51 | 1 | 0 | 4.648383  | -4.197841 | -1.591781 |
| 52 | 1 | 0 | 6.663443  | -2.791895 | -1.957626 |
| 53 | 6 | 0 | 1.905806  | 2.337007  | -0.544239 |
| 54 | 6 | 0 | 2.876093  | 3.321809  | -0.718453 |
| 55 | 6 | 0 | 2.886537  | 4.421994  | 0.139660  |
| 56 | 1 | 0 | 3.606797  | 3.229908  | -1.515528 |
| 57 | 6 | 0 | 0.994795  | 3.480843  | 1.265740  |
| 58 | 6 | 0 | 1.927525  | 4.505149  | 1.150311  |
| 59 | 1 | 0 | 3.632411  | 5.201584  | 0.021574  |
| 60 | 1 | 0 | 0.224220  | 3.507210  | 2.030523  |
| 61 | 1 | 0 | 1.900819  | 5.343801  | 1.836851  |
| 62 | 7 | 0 | 0.984825  | 2.415241  | 0.441133  |
| 63 | 1 | 0 | -2.934861 | 1.266693  | -0.644342 |
| 64 | 1 | 0 | -1.834237 | 1.839218  | -0.124962 |

-----

**3''<sub>B</sub>** (singlet) E(B3LYP/ SDD-6-31G(d,p))= -1444.78148567 hartree

| Center<br>Number | Atomic<br>Number | Atomic<br>Type | Coordinates (Angstroms) |           |           |
|------------------|------------------|----------------|-------------------------|-----------|-----------|
|                  |                  |                | X                       | Y         | Z         |
| 1                | 7                | 0              | -1.426743               | -1.341825 | -0.408052 |
| 2                | 6                | 0              | -2.433158               | -1.464069 | -1.505921 |
| 3                | 1                | 0              | -1.972442               | -1.065309 | -2.417657 |
| 4                | 1                | 0              | -2.634327               | -2.525549 | -1.700122 |
| 5                | 6                | 0              | -1.969783               | -1.871407 | 0.878301  |
| 6                | 1                | 0              | -2.991203               | -1.497250 | 0.998685  |

|    |    |   |           |           |           |
|----|----|---|-----------|-----------|-----------|
| 7  | 1  | 0 | -2.026571 | -2.967759 | 0.864917  |
| 8  | 6  | 0 | -0.207602 | -2.141699 | -0.813642 |
| 9  | 1  | 0 | 0.259719  | -2.502548 | 0.104386  |
| 10 | 1  | 0 | -0.503701 | -3.026739 | -1.390414 |
| 11 | 26 | 0 | -0.616743 | 0.551430  | 0.052405  |
| 12 | 6  | 0 | -3.780881 | -0.788271 | -1.329519 |
| 13 | 6  | 0 | -4.936125 | -1.338251 | -1.880916 |
| 14 | 6  | 0 | -5.025203 | 1.084198  | -0.578378 |
| 15 | 6  | 0 | -6.146727 | -0.646705 | -1.785235 |
| 16 | 1  | 0 | -4.888573 | -2.297378 | -2.385282 |
| 17 | 6  | 0 | -6.196303 | 0.584210  | -1.125711 |
| 18 | 1  | 0 | -4.970321 | 2.021834  | -0.035702 |
| 19 | 1  | 0 | -7.046932 | -1.071408 | -2.218264 |
| 20 | 1  | 0 | -7.121391 | 1.140865  | -1.030673 |
| 21 | 6  | 0 | -1.144239 | -1.381501 | 2.044540  |
| 22 | 6  | 0 | -1.110616 | -2.052424 | 3.264518  |
| 23 | 6  | 0 | -0.407433 | -1.491622 | 4.330595  |
| 24 | 1  | 0 | -1.634620 | -2.996067 | 3.377799  |
| 25 | 6  | 0 | 0.188441  | 0.326841  | 2.884577  |
| 26 | 6  | 0 | 0.248254  | -0.275963 | 4.135835  |
| 27 | 1  | 0 | -0.372327 | -1.993883 | 5.291746  |
| 28 | 1  | 0 | 0.692673  | 1.265232  | 2.687177  |
| 29 | 1  | 0 | 0.805165  | 0.200043  | 4.935123  |
| 30 | 7  | 0 | -3.869946 | 0.402334  | -0.699802 |
| 31 | 7  | 0 | -0.491723 | -0.210848 | 1.851503  |
| 32 | 6  | 0 | 0.784240  | -1.291608 | -1.599656 |
| 33 | 1  | 0 | 1.640307  | -1.900695 | -1.911469 |
| 34 | 1  | 0 | 0.322121  | -0.909297 | -2.515683 |
| 35 | 7  | 0 | 1.199403  | -0.132821 | -0.763411 |
| 36 | 6  | 0 | 1.628222  | 1.047536  | -1.568533 |
| 37 | 1  | 0 | 2.663029  | 0.955505  | -1.913482 |
| 38 | 1  | 0 | 1.001316  | 1.095540  | -2.468107 |
| 39 | 6  | 0 | 2.275566  | -0.500811 | 0.247809  |
| 40 | 1  | 0 | 2.421016  | 0.391446  | 0.861475  |
| 41 | 1  | 0 | 1.847696  | -1.265190 | 0.898389  |
| 42 | 6  | 0 | 3.596650  | -0.971938 | -0.316424 |
| 43 | 6  | 0 | 4.635909  | -0.060897 | -0.565605 |
| 44 | 6  | 0 | 3.826778  | -2.335584 | -0.561124 |
| 45 | 6  | 0 | 5.858439  | -0.495845 | -1.078520 |
| 46 | 1  | 0 | 4.501028  | 0.991833  | -0.327118 |
| 47 | 6  | 0 | 5.048065  | -2.772868 | -1.074861 |
| 48 | 1  | 0 | 3.059153  | -3.067926 | -0.319652 |
| 49 | 6  | 0 | 6.063154  | -1.851856 | -1.341387 |
| 50 | 1  | 0 | 6.654963  | 0.219317  | -1.258160 |

|    |   |   |           |           |           |
|----|---|---|-----------|-----------|-----------|
| 51 | 1 | 0 | 5.212903  | -3.830999 | -1.251862 |
| 52 | 1 | 0 | 7.016120  | -2.191737 | -1.734053 |
| 53 | 6 | 0 | 1.422622  | 2.312540  | -0.760166 |
| 54 | 6 | 0 | 2.204952  | 3.452875  | -0.920273 |
| 55 | 6 | 0 | 1.898323  | 4.595417  | -0.179558 |
| 56 | 1 | 0 | 3.038246  | 3.445198  | -1.615169 |
| 57 | 6 | 0 | 0.074581  | 3.391618  | 0.807648  |
| 58 | 6 | 0 | 0.814145  | 4.563500  | 0.698980  |
| 59 | 1 | 0 | 2.495936  | 5.494971  | -0.286971 |
| 60 | 1 | 0 | -0.783901 | 3.315534  | 1.465471  |
| 61 | 1 | 0 | 0.540887  | 5.430876  | 1.289349  |
| 62 | 7 | 0 | 0.372618  | 2.281243  | 0.100384  |
| 63 | 1 | 0 | -2.960369 | 0.803956  | -0.213637 |
| 64 | 1 | 0 | -1.977180 | 1.261299  | 0.447846  |

-----  
**3''<sub>B</sub>** (triplet) E(B3LYP/ SDD-6-31G(d,p))= -1444.79520562 hartree  
 -----

| Center<br>Number | Atomic<br>Number | Atomic<br>Type | Coordinates (Angstroms) |           |           |
|------------------|------------------|----------------|-------------------------|-----------|-----------|
|                  |                  |                | X                       | Y         | Z         |
| 1                | 7                | 0              | -1.392595               | -1.143368 | -0.861540 |
| 2                | 6                | 0              | -2.340904               | -0.795452 | -1.954095 |
| 3                | 1                | 0              | -1.832243               | -0.096467 | -2.628004 |
| 4                | 1                | 0              | -2.567649               | -1.690146 | -2.550778 |
| 5                | 6                | 0              | -1.997230               | -2.153840 | 0.054417  |
| 6                | 1                | 0              | -3.008454               | -1.822459 | 0.311122  |
| 7                | 1                | 0              | -2.096415               | -3.123452 | -0.452576 |
| 8                | 6                | 0              | -0.138536               | -1.713405 | -1.476727 |
| 9                | 1                | 0              | 0.310560                | -2.376871 | -0.735380 |
| 10               | 1                | 0              | -0.387875               | -2.332770 | -2.348642 |
| 11               | 26               | 0              | -0.570746               | 0.461161  | 0.420301  |
| 12               | 6                | 0              | -3.670356               | -0.175267 | -1.563707 |
| 13               | 6                | 0              | -4.805334               | -0.359258 | -2.350609 |
| 14               | 6                | 0              | -4.901045               | 1.255903  | -0.124651 |
| 15               | 6                | 0              | -5.995276               | 0.291943  | -2.017242 |
| 16               | 1                | 0              | -4.756072               | -1.005969 | -3.220048 |
| 17               | 6                | 0              | -6.048100               | 1.113501  | -0.887402 |
| 18               | 1                | 0              | -4.849829               | 1.857471  | 0.776268  |
| 19               | 1                | 0              | -6.878347               | 0.151915  | -2.632761 |
| 20               | 1                | 0              | -6.958778               | 1.625626  | -0.599339 |
| 21               | 6                | 0              | -1.207261               | -2.304998 | 1.338438  |
| 22               | 6                | 0              | -1.275289               | -3.472506 | 2.097464  |
| 23               | 6                | 0              | -0.606621               | -3.524882 | 3.320330  |
| 24               | 1                | 0              | -1.847398               | -4.322879 | 1.739901  |

|    |   |   |           |           |           |
|----|---|---|-----------|-----------|-----------|
| 25 | 6 | 0 | 0.153591  | -1.289388 | 2.915486  |
| 26 | 6 | 0 | 0.117661  | -2.408797 | 3.740135  |
| 27 | 1 | 0 | -0.649208 | -4.420373 | 3.931801  |
| 28 | 1 | 0 | 0.714531  | -0.404633 | 3.201073  |
| 29 | 1 | 0 | 0.651428  | -2.403426 | 4.683888  |
| 30 | 7 | 0 | -3.762709 | 0.626418  | -0.480497 |
| 31 | 7 | 0 | -0.492776 | -1.233036 | 1.734865  |
| 32 | 6 | 0 | 0.849573  | -0.623533 | -1.869918 |
| 33 | 1 | 0 | 1.728411  | -1.071088 | -2.347262 |
| 34 | 1 | 0 | 0.398318  | 0.042350  | -2.611525 |
| 35 | 7 | 0 | 1.228229  | 0.196560  | -0.682214 |
| 36 | 6 | 0 | 1.633006  | 1.578571  | -1.083035 |
| 37 | 1 | 0 | 2.684842  | 1.621500  | -1.380914 |
| 38 | 1 | 0 | 1.044684  | 1.865228  | -1.962375 |
| 39 | 6 | 0 | 2.320838  | -0.458784 | 0.154046  |
| 40 | 1 | 0 | 2.437421  | 0.178104  | 1.035772  |
| 41 | 1 | 0 | 1.913743  | -1.409816 | 0.500875  |
| 42 | 6 | 0 | 3.658492  | -0.672503 | -0.517517 |
| 43 | 6 | 0 | 4.670500  | 0.296748  | -0.424881 |
| 44 | 6 | 0 | 3.931296  | -1.862919 | -1.211020 |
| 45 | 6 | 0 | 5.907273  | 0.098649  | -1.039690 |
| 46 | 1 | 0 | 4.502683  | 1.199490  | 0.158549  |
| 47 | 6 | 0 | 5.166823  | -2.062865 | -1.827705 |
| 48 | 1 | 0 | 3.186142  | -2.655051 | -1.245039 |
| 49 | 6 | 0 | 6.153822  | -1.078274 | -1.749415 |
| 50 | 1 | 0 | 6.682113  | 0.853740  | -0.952311 |
| 51 | 1 | 0 | 5.364649  | -2.991035 | -2.354498 |
| 52 | 1 | 0 | 7.117663  | -1.235997 | -2.222703 |
| 53 | 6 | 0 | 1.327368  | 2.560366  | 0.021368  |
| 54 | 6 | 0 | 2.072417  | 3.713924  | 0.246530  |
| 55 | 6 | 0 | 1.664022  | 4.601832  | 1.243592  |
| 56 | 1 | 0 | 2.955586  | 3.913872  | -0.351007 |
| 57 | 6 | 0 | -0.177974 | 3.140620  | 1.709970  |
| 58 | 6 | 0 | 0.520323  | 4.309904  | 1.987692  |
| 59 | 1 | 0 | 2.231695  | 5.506593  | 1.436552  |
| 60 | 1 | 0 | -1.073157 | 2.864170  | 2.254344  |
| 61 | 1 | 0 | 0.171247  | 4.974010  | 2.770291  |
| 62 | 7 | 0 | 0.216544  | 2.278305  | 0.748101  |
| 63 | 1 | 0 | -2.893570 | 0.743774  | 0.165634  |
| 64 | 1 | 0 | -1.932637 | 0.868515  | 1.099137  |

-----  
**3''<sub>c</sub>**(quintet) E(B3LYP/ SDD-6-31G(d,p))= -1444.81723079 hartree  
 -----

| Center<br>Number | Atomic<br>Number | Atomic<br>Type | Coordinates (Angstroms) |           |           |
|------------------|------------------|----------------|-------------------------|-----------|-----------|
|                  |                  |                | X                       | Y         | Z         |
| 1                | 7                | 0              | 1.491882                | 1.077035  | -1.072833 |
| 2                | 6                | 0              | 2.311577                | 0.303046  | -2.046282 |
| 3                | 1                | 0              | 1.632795                | -0.230156 | -2.717805 |
| 4                | 1                | 0              | 2.908532                | 0.971358  | -2.681647 |
| 5                | 6                | 0              | 2.340996                | 2.191009  | -0.569363 |
| 6                | 1                | 0              | 3.252411                | 1.741120  | -0.157808 |
| 7                | 1                | 0              | 2.654515                | 2.832261  | -1.405351 |
| 8                | 6                | 0              | 0.231774                | 1.566379  | -1.693237 |
| 9                | 1                | 0              | -0.195494               | 2.317340  | -1.023789 |
| 10               | 1                | 0              | 0.425001                | 2.070603  | -2.652177 |
| 11               | 26               | 0              | 0.813468                | -0.669919 | 0.470845  |
| 12               | 6                | 0              | 3.203271                | -0.721460 | -1.377412 |
| 13               | 6                | 0              | 4.479632                | -1.012539 | -1.853310 |
| 14               | 6                | 0              | 3.373959                | -2.381404 | 0.242069  |
| 15               | 6                | 0              | 5.212897                | -2.036563 | -1.250562 |
| 16               | 1                | 0              | 4.890953                | -0.451672 | -2.686286 |
| 17               | 6                | 0              | 4.648813                | -2.736683 | -0.184513 |
| 18               | 1                | 0              | 2.899892                | -2.894630 | 1.072553  |
| 19               | 1                | 0              | 6.208419                | -2.280650 | -1.607486 |
| 20               | 1                | 0              | 5.183030                | -3.538843 | 0.311981  |
| 21               | 6                | 0              | 1.749471                | 3.100863  | 0.487770  |
| 22               | 6                | 0              | 1.746235                | 4.486998  | 0.358173  |
| 23               | 6                | 0              | 1.295609                | 5.286238  | 1.414129  |
| 24               | 1                | 0              | 2.105939                | 4.939552  | -0.559301 |
| 25               | 6                | 0              | 0.851326                | 3.307458  | 2.678287  |
| 26               | 6                | 0              | 0.842896                | 4.691773  | 2.593732  |
| 27               | 1                | 0              | 1.300652                | 6.367090  | 1.313754  |
| 28               | 1                | 0              | 0.515594                | 2.756710  | 3.550399  |
| 29               | 1                | 0              | 0.491039                | 5.283876  | 3.430547  |
| 30               | 7                | 0              | 2.660029                | -1.396221 | -0.339367 |
| 31               | 7                | 0              | 1.297893                | 2.566509  | 1.646756  |
| 32               | 6                | 0              | -0.777514               | 0.438194  | -1.925384 |
| 33               | 1                | 0              | -1.698079               | 0.863105  | -2.341579 |
| 34               | 1                | 0              | -0.397518               | -0.259762 | -2.675843 |
| 35               | 7                | 0              | -1.059115               | -0.338823 | -0.687964 |
| 36               | 6                | 0              | -1.579488               | -1.696516 | -1.014010 |
| 37               | 1                | 0              | -2.619667               | -1.656261 | -1.354588 |
| 38               | 1                | 0              | -0.983816               | -2.091228 | -1.845772 |
| 39               | 6                | 0              | -1.998716               | 0.402366  | 0.254618  |
| 40               | 1                | 0              | -2.031154               | -0.184759 | 1.175960  |
| 41               | 1                | 0              | -1.505872               | 1.347261  | 0.498945  |

|    |   |   |           |           |           |
|----|---|---|-----------|-----------|-----------|
| 42 | 6 | 0 | -3.401255 | 0.660523  | -0.250601 |
| 43 | 6 | 0 | -4.433393 | -0.252573 | 0.018181  |
| 44 | 6 | 0 | -3.708888 | 1.831054  | -0.962357 |
| 45 | 6 | 0 | -5.730856 | -0.016442 | -0.437537 |
| 46 | 1 | 0 | -4.227715 | -1.141629 | 0.609794  |
| 47 | 6 | 0 | -5.005187 | 2.068394  | -1.420787 |
| 48 | 1 | 0 | -2.938829 | 2.579421  | -1.138343 |
| 49 | 6 | 0 | -6.017035 | 1.141202  | -1.163914 |
| 50 | 1 | 0 | -6.520058 | -0.727586 | -0.214681 |
| 51 | 1 | 0 | -5.228364 | 2.980573  | -1.965139 |
| 52 | 1 | 0 | -7.027188 | 1.327967  | -1.513976 |
| 53 | 6 | 0 | -1.440283 | -2.633694 | 0.168176  |
| 54 | 6 | 0 | -2.317422 | -3.694741 | 0.386199  |
| 55 | 6 | 0 | -2.097397 | -4.543485 | 1.471641  |
| 56 | 1 | 0 | -3.156399 | -3.852176 | -0.283827 |
| 57 | 6 | 0 | -0.191445 | -3.211355 | 2.043387  |
| 58 | 6 | 0 | -1.016665 | -4.295489 | 2.319540  |
| 59 | 1 | 0 | -2.765360 | -5.378231 | 1.658747  |
| 60 | 1 | 0 | 0.647650  | -2.964870 | 2.687484  |
| 61 | 1 | 0 | -0.819602 | -4.921861 | 3.182258  |
| 62 | 7 | 0 | -0.389010 | -2.403478 | 0.983026  |
| 63 | 1 | 0 | 1.260054  | 1.489603  | 1.744200  |
| 64 | 1 | 0 | 1.139236  | 0.133907  | 1.919680  |

-----  
**3''<sub>c</sub>** (singlet) E(B3LYP/ SDD-6-31G(d,p))= -1444.78177182 hartree  
 -----

| Center<br>Number | Atomic<br>Number | Atomic<br>Type | Coordinates (Angstroms) |           |           |
|------------------|------------------|----------------|-------------------------|-----------|-----------|
|                  |                  |                | X                       | Y         | Z         |
| 1                | 7                | 0              | 1.224292                | 1.106669  | -1.172694 |
| 2                | 6                | 0              | 2.151007                | 0.429286  | -2.140198 |
| 3                | 1                | 0              | 1.564285                | -0.283128 | -2.732028 |
| 4                | 1                | 0              | 2.583968                | 1.142755  | -2.853861 |
| 5                | 6                | 0              | 1.949229                | 2.300756  | -0.641850 |
| 6                | 1                | 0              | 2.929125                | 1.958389  | -0.293358 |
| 7                | 1                | 0              | 2.130027                | 3.013561  | -1.456836 |
| 8                | 6                | 0              | -0.069986               | 1.515568  | -1.808927 |
| 9                | 1                | 0              | -0.524992               | 2.266673  | -1.158689 |
| 10               | 1                | 0              | 0.103012                | 1.994554  | -2.782117 |
| 11               | 26               | 0              | 0.815480                | -0.605610 | -0.028503 |
| 12               | 6                | 0              | 3.235221                | -0.297129 | -1.366375 |
| 13               | 6                | 0              | 4.544776                | -0.406030 | -1.821852 |
| 14               | 6                | 0              | 3.736362                | -1.483087 | 0.564002  |
| 15               | 6                | 0              | 5.474898                | -1.099732 | -1.044201 |

|    |   |   |           |           |           |
|----|---|---|-----------|-----------|-----------|
| 16 | 1 | 0 | 4.833253  | 0.044114  | -2.766260 |
| 17 | 6 | 0 | 5.063406  | -1.638437 | 0.173769  |
| 18 | 1 | 0 | 3.386577  | -1.876013 | 1.510570  |
| 19 | 1 | 0 | 6.501972  | -1.204095 | -1.378485 |
| 20 | 1 | 0 | 5.755150  | -2.169188 | 0.818332  |
| 21 | 6 | 0 | 1.291250  | 3.054304  | 0.492052  |
| 22 | 6 | 0 | 1.245583  | 4.444672  | 0.541234  |
| 23 | 6 | 0 | 0.732553  | 5.080889  | 1.676004  |
| 24 | 1 | 0 | 1.617562  | 5.024923  | -0.296154 |
| 25 | 6 | 0 | 0.310777  | 2.937995  | 2.650409  |
| 26 | 6 | 0 | 0.260364  | 4.320337  | 2.748768  |
| 27 | 1 | 0 | 0.701345  | 6.165067  | 1.719831  |
| 28 | 1 | 0 | -0.041544 | 2.268572  | 3.427589  |
| 29 | 1 | 0 | -0.141676 | 4.785704  | 3.641228  |
| 30 | 7 | 0 | 2.824502  | -0.840131 | -0.190539 |
| 31 | 7 | 0 | 0.819640  | 2.355731  | 1.548037  |
| 32 | 6 | 0 | -1.015893 | 0.326613  | -1.971006 |
| 33 | 1 | 0 | -1.991021 | 0.675109  | -2.329125 |
| 34 | 1 | 0 | -0.633355 | -0.355177 | -2.736431 |
| 35 | 7 | 0 | -1.136599 | -0.441377 | -0.694205 |
| 36 | 6 | 0 | -1.535011 | -1.860249 | -0.956775 |
| 37 | 1 | 0 | -2.616991 | -1.959835 | -1.084885 |
| 38 | 1 | 0 | -1.076074 | -2.173052 | -1.902317 |
| 39 | 6 | 0 | -2.082460 | 0.213626  | 0.300777  |
| 40 | 1 | 0 | -1.987157 | -0.370238 | 1.218922  |
| 41 | 1 | 0 | -1.668429 | 1.203205  | 0.506737  |
| 42 | 6 | 0 | -3.531837 | 0.327707  | -0.114785 |
| 43 | 6 | 0 | -4.453503 | -0.672628 | 0.234041  |
| 44 | 6 | 0 | -3.994285 | 1.448323  | -0.823665 |
| 45 | 6 | 0 | -5.792857 | -0.572125 | -0.144239 |
| 46 | 1 | 0 | -4.127443 | -1.522825 | 0.829051  |
| 47 | 6 | 0 | -5.332697 | 1.550633  | -1.204504 |
| 48 | 1 | 0 | -3.312371 | 2.263682  | -1.057330 |
| 49 | 6 | 0 | -6.232348 | 0.536073  | -0.871210 |
| 50 | 1 | 0 | -6.494846 | -1.350049 | 0.138971  |
| 51 | 1 | 0 | -5.676006 | 2.425183  | -1.748121 |
| 52 | 1 | 0 | -7.274863 | 0.617141  | -1.161800 |
| 53 | 6 | 0 | -1.019899 | -2.745890 | 0.151336  |
| 54 | 6 | 0 | -1.683046 | -3.896337 | 0.569227  |
| 55 | 6 | 0 | -1.116039 | -4.681019 | 1.573707  |
| 56 | 1 | 0 | -2.628169 | -4.171077 | 0.112480  |
| 57 | 6 | 0 | 0.690804  | -3.109177 | 1.675859  |
| 58 | 6 | 0 | 0.091321  | -4.274129 | 2.140710  |
| 59 | 1 | 0 | -1.612529 | -5.583960 | 1.913921  |



|    |   |   |          |           |          |
|----|---|---|----------|-----------|----------|
| 60 | 1 | 0 | 1.615187 | -2.750437 | 2.110312 |
| 61 | 1 | 0 | 0.562406 | -4.842278 | 2.934916 |
| 62 | 7 | 0 | 0.163971 | -2.357746 | 0.688965 |
| 63 | 1 | 0 | 0.815377 | 1.271313  | 1.461798 |
| 64 | 1 | 0 | 0.728955 | -0.029644 | 1.383438 |

-----

**3''<sub>c</sub>** (triplet) E(B3LYP/ SDD-6-31G(d,p))= -1444.79461573 hartree

-----

| Center<br>Number | Atomic<br>Number | Atomic<br>Type | Coordinates (Angstroms) |           |           |
|------------------|------------------|----------------|-------------------------|-----------|-----------|
|                  |                  |                | X                       | Y         | Z         |
| 1                | 7                | 0              | 1.317158                | 1.163015  | -1.048643 |
| 2                | 6                | 0              | 2.215816                | 0.536999  | -2.083979 |
| 3                | 1                | 0              | 1.583375                | 0.010844  | -2.803791 |
| 4                | 1                | 0              | 2.750694                | 1.309557  | -2.648618 |
| 5                | 6                | 0              | 2.053412                | 2.363509  | -0.530415 |
| 6                | 1                | 0              | 2.997431                | 1.997085  | -0.113363 |
| 7                | 1                | 0              | 2.304380                | 3.022698  | -1.370893 |
| 8                | 6                | 0              | 0.019753                | 1.558533  | -1.694227 |
| 9                | 1                | 0              | -0.483896               | 2.254632  | -1.019532 |
| 10               | 1                | 0              | 0.199878                | 2.094457  | -2.636167 |
| 11               | 26               | 0              | 0.821328                | -0.447470 | 0.290637  |
| 12               | 6                | 0              | 3.167569                | -0.464089 | -1.481767 |
| 13               | 6                | 0              | 4.465131                | -0.656928 | -1.945846 |
| 14               | 6                | 0              | 3.373353                | -2.214340 | 0.027611  |
| 15               | 6                | 0              | 5.231673                | -1.684365 | -1.390151 |
| 16               | 1                | 0              | 4.867654                | -0.024431 | -2.730333 |
| 17               | 6                | 0              | 4.674688                | -2.479697 | -0.389663 |
| 18               | 1                | 0              | 2.903345                | -2.802139 | 0.808698  |
| 19               | 1                | 0              | 6.246045                | -1.858542 | -1.734490 |
| 20               | 1                | 0              | 5.234731                | -3.289135 | 0.064926  |
| 21               | 6                | 0              | 1.366314                | 3.224667  | 0.509829  |
| 22               | 6                | 0              | 1.200040                | 4.597565  | 0.350230  |
| 23               | 6                | 0              | 0.665908                | 5.358172  | 1.396182  |
| 24               | 1                | 0              | 1.498635                | 5.071695  | -0.578386 |
| 25               | 6                | 0              | 0.469024                | 3.364107  | 2.701291  |
| 26               | 6                | 0              | 0.296033                | 4.736992  | 2.590685  |
| 27               | 1                | 0              | 0.542716                | 6.430010  | 1.276688  |
| 28               | 1                | 0              | 0.207073                | 2.797571  | 3.588535  |
| 29               | 1                | 0              | -0.116196               | 5.300290  | 3.419892  |
| 30               | 7                | 0              | 2.630572                | -1.226414 | -0.504525 |
| 31               | 7                | 0              | 0.992315                | 2.663039  | 1.680506  |
| 32               | 6                | 0              | -0.872381               | 0.339409  | -1.944762 |

|    |   |   |           |           |           |
|----|---|---|-----------|-----------|-----------|
| 33 | 1 | 0 | -1.834952 | 0.664016  | -2.355221 |
| 34 | 1 | 0 | -0.425257 | -0.324426 | -2.689090 |
| 35 | 7 | 0 | -1.040381 | -0.429235 | -0.682999 |
| 36 | 6 | 0 | -1.292764 | -1.885470 | -0.885512 |
| 37 | 1 | 0 | -2.329798 | -2.086416 | -1.174258 |
| 38 | 1 | 0 | -0.653548 | -2.226870 | -1.708430 |
| 39 | 6 | 0 | -2.090052 | 0.190336  | 0.232550  |
| 40 | 1 | 0 | -2.037733 | -0.361162 | 1.174111  |
| 41 | 1 | 0 | -1.754588 | 1.209365  | 0.442024  |
| 42 | 6 | 0 | -3.507205 | 0.204637  | -0.294729 |
| 43 | 6 | 0 | -4.379047 | -0.863189 | -0.027375 |
| 44 | 6 | 0 | -3.990879 | 1.299759  | -1.028420 |
| 45 | 6 | 0 | -5.688335 | -0.851642 | -0.509292 |
| 46 | 1 | 0 | -4.042433 | -1.695757 | 0.586114  |
| 47 | 6 | 0 | -5.299674 | 1.313043  | -1.511871 |
| 48 | 1 | 0 | -3.352470 | 2.164023  | -1.200253 |
| 49 | 6 | 0 | -6.147916 | 0.233264  | -1.258765 |
| 50 | 1 | 0 | -6.353341 | -1.680528 | -0.288235 |
| 51 | 1 | 0 | -5.661113 | 2.169315  | -2.072472 |
| 52 | 1 | 0 | -7.168110 | 0.245176  | -1.628732 |
| 53 | 6 | 0 | -0.925682 | -2.633169 | 0.381884  |
| 54 | 6 | 0 | -1.551362 | -3.811610 | 0.778469  |
| 55 | 6 | 0 | -1.137311 | -4.439901 | 1.954456  |
| 56 | 1 | 0 | -2.351420 | -4.228442 | 0.175459  |
| 57 | 6 | 0 | 0.455864  | -2.674738 | 2.264372  |
| 58 | 6 | 0 | -0.121121 | -3.857768 | 2.713148  |
| 59 | 1 | 0 | -1.610559 | -5.360941 | 2.279258  |
| 60 | 1 | 0 | 1.234563  | -2.168250 | 2.824049  |
| 61 | 1 | 0 | 0.216313  | -4.303807 | 3.641960  |
| 62 | 7 | 0 | 0.076440  | -2.081308 | 1.114315  |
| 63 | 1 | 0 | 1.088784  | 1.569350  | 1.746715  |
| 64 | 1 | 0 | 1.207428  | 0.286790  | 1.713093  |

-----  
**3''<sub>dp-A</sub>** (quintet) E(B3LYP/ SDD-6-31G(d,p))= -1444.50966923 hartree  
 -----

| Center<br>Number | Atomic<br>Number | Atomic<br>Type | Coordinates (Angstroms) |           |          |
|------------------|------------------|----------------|-------------------------|-----------|----------|
|                  |                  |                | X                       | Y         | Z        |
| 1                | 7                | 0              | 0.870635                | -0.829247 | 1.427049 |
| 2                | 6                | 0              | 1.958528                | -0.041074 | 2.030537 |
| 3                | 1                | 0              | 1.605248                | 0.989186  | 2.150585 |
| 4                | 1                | 0              | 2.230317                | -0.405490 | 3.033703 |
| 5                | 6                | 0              | 1.199462                | -2.269372 | 1.410745 |

|    |    |   |           |           |           |
|----|----|---|-----------|-----------|-----------|
| 6  | 1  | 0 | 2.286339  | -2.369425 | 1.321564  |
| 7  | 1  | 0 | 0.918232  | -2.757662 | 2.355293  |
| 8  | 6  | 0 | -0.452341 | -0.585063 | 2.043091  |
| 9  | 1  | 0 | -1.062107 | -1.473306 | 1.858739  |
| 10 | 1  | 0 | -0.373039 | -0.483529 | 3.136409  |
| 11 | 26 | 0 | 0.804279  | -0.021638 | -0.877168 |
| 12 | 6  | 0 | 3.181970  | -0.041845 | 1.129529  |
| 13 | 6  | 0 | 4.480204  | -0.002839 | 1.639283  |
| 14 | 6  | 0 | 3.979308  | -0.065569 | -1.049959 |
| 15 | 6  | 0 | 5.556624  | 0.011924  | 0.751670  |
| 16 | 1  | 0 | 4.642347  | 0.009819  | 2.712562  |
| 17 | 6  | 0 | 5.303224  | -0.024179 | -0.619643 |
| 18 | 1  | 0 | 3.722992  | -0.091689 | -2.105537 |
| 19 | 1  | 0 | 6.575278  | 0.041446  | 1.125577  |
| 20 | 1  | 0 | 6.110082  | -0.023942 | -1.344164 |
| 21 | 6  | 0 | 0.578093  | -2.991858 | 0.232402  |
| 22 | 6  | 0 | 0.221153  | -4.338990 | 0.299729  |
| 23 | 6  | 0 | -0.241707 | -4.973159 | -0.853721 |
| 24 | 1  | 0 | 0.311725  | -4.881349 | 1.235940  |
| 25 | 6  | 0 | 0.021498  | -2.893369 | -2.013595 |
| 26 | 6  | 0 | -0.335928 | -4.239776 | -2.035746 |
| 27 | 1  | 0 | -0.523073 | -6.021344 | -0.827847 |
| 28 | 1  | 0 | -0.040019 | -2.263707 | -2.896845 |
| 29 | 1  | 0 | -0.685219 | -4.694153 | -2.956457 |
| 30 | 7  | 0 | 2.940850  | -0.070022 | -0.196564 |
| 31 | 7  | 0 | 0.464127  | -2.280353 | -0.903485 |
| 32 | 6  | 0 | -1.156447 | 0.647182  | 1.472749  |
| 33 | 1  | 0 | -2.133716 | 0.760032  | 1.961942  |
| 34 | 1  | 0 | -0.579932 | 1.544156  | 1.712886  |
| 35 | 7  | 0 | -1.292816 | 0.583374  | -0.001360 |
| 36 | 6  | 0 | -1.542392 | 1.922667  | -0.568814 |
| 37 | 1  | 0 | -1.762828 | 1.785358  | -1.634475 |
| 38 | 1  | 0 | -2.420485 | 2.405179  | -0.118380 |
| 39 | 6  | 0 | -2.337557 | -0.391616 | -0.462435 |
| 40 | 1  | 0 | -2.242009 | -0.437112 | -1.551296 |
| 41 | 1  | 0 | -2.049823 | -1.374070 | -0.083225 |
| 42 | 6  | 0 | -3.772704 | -0.088228 | -0.072688 |
| 43 | 6  | 0 | -4.597370 | 0.678821  | -0.909217 |
| 44 | 6  | 0 | -4.314911 | -0.587150 | 1.121617  |
| 45 | 6  | 0 | -5.916645 | 0.959764  | -0.552242 |
| 46 | 1  | 0 | -4.211396 | 1.043085  | -1.858121 |
| 47 | 6  | 0 | -5.633417 | -0.307067 | 1.483653  |
| 48 | 1  | 0 | -3.708907 | -1.219917 | 1.766359  |
| 49 | 6  | 0 | -6.435901 | 0.471999  | 0.648596  |

|    |   |   |           |           |           |
|----|---|---|-----------|-----------|-----------|
| 50 | 1 | 0 | -6.541765 | 1.549072  | -1.216347 |
| 51 | 1 | 0 | -6.036450 | -0.705938 | 2.409743  |
| 52 | 1 | 0 | -7.463795 | 0.685860  | 0.924927  |
| 53 | 6 | 0 | -0.343275 | 2.840384  | -0.466412 |
| 54 | 6 | 0 | -0.505728 | 4.228122  | -0.468120 |
| 55 | 6 | 0 | 0.622577  | 5.044150  | -0.470279 |
| 56 | 1 | 0 | -1.503546 | 4.655292  | -0.473872 |
| 57 | 6 | 0 | 1.957952  | 3.059069  | -0.442324 |
| 58 | 6 | 0 | 1.883867  | 4.447615  | -0.460886 |
| 59 | 1 | 0 | 0.520061  | 6.124822  | -0.477684 |
| 60 | 1 | 0 | 2.917889  | 2.553475  | -0.433017 |
| 61 | 1 | 0 | 2.791177  | 5.041620  | -0.464307 |
| 62 | 7 | 0 | 0.872871  | 2.264593  | -0.442720 |
| 63 | 1 | 0 | 0.656671  | 0.075166  | -2.543846 |

-----  
**3''<sub>dp-A</sub>** (singlet) E(B3LYP/ SDD-6-31G(d,p))= -1444.49703534 hartree

| Center<br>Number | Atomic<br>Number | Atomic<br>Type | Coordinates (Angstroms) |           |           |
|------------------|------------------|----------------|-------------------------|-----------|-----------|
|                  |                  |                | X                       | Y         | Z         |
| 1                | 7                | 0              | 0.860407                | -0.657397 | 1.567893  |
| 2                | 6                | 0              | 2.021357                | 0.103223  | 2.075433  |
| 3                | 1                | 0              | 1.718132                | 1.149516  | 2.188728  |
| 4                | 1                | 0              | 2.363995                | -0.250238 | 3.060258  |
| 5                | 6                | 0              | 1.153084                | -2.115227 | 1.550311  |
| 6                | 1                | 0              | 2.238780                | -2.251159 | 1.581243  |
| 7                | 1                | 0              | 0.754978                | -2.614835 | 2.442793  |
| 8                | 6                | 0              | -0.451964               | -0.375792 | 2.208997  |
| 9                | 1                | 0              | -1.023652               | -1.307511 | 2.194324  |
| 10               | 1                | 0              | -0.333820               | -0.097998 | 3.265596  |
| 11               | 26               | 0              | 0.758282                | 0.027401  | -0.459813 |
| 12               | 6                | 0              | 3.144067                | -0.002975 | 1.053763  |
| 13               | 6                | 0              | 4.491066                | 0.005333  | 1.404917  |
| 14               | 6                | 0              | 3.675171                | -0.200427 | -1.204079 |
| 15               | 6                | 0              | 5.457135                | -0.082014 | 0.399506  |
| 16               | 1                | 0              | 4.778592                | 0.076991  | 2.449191  |
| 17               | 6                | 0              | 5.040688                | -0.190270 | -0.926152 |
| 18               | 1                | 0              | 3.291204                | -0.272605 | -2.215378 |
| 19               | 1                | 0              | 6.512913                | -0.073437 | 0.650726  |
| 20               | 1                | 0              | 5.755829                | -0.266619 | -1.737821 |
| 21               | 6                | 0              | 0.643140                | -2.762911 | 0.284208  |
| 22               | 6                | 0              | 0.395240                | -4.131801 | 0.196591  |
| 23               | 6                | 0              | 0.030107                | -4.678054 | -1.033020 |

|    |   |   |           |           |           |
|----|---|---|-----------|-----------|-----------|
| 24 | 1 | 0 | 0.494805  | -4.757466 | 1.078206  |
| 25 | 6 | 0 | 0.174926  | -2.471847 | -1.967721 |
| 26 | 6 | 0 | -0.072272 | -3.830527 | -2.135972 |
| 27 | 1 | 0 | -0.166827 | -5.741152 | -1.127330 |
| 28 | 1 | 0 | 0.103537  | -1.765130 | -2.785477 |
| 29 | 1 | 0 | -0.344816 | -4.208887 | -3.115055 |
| 30 | 7 | 0 | 2.741309  | -0.102864 | -0.240446 |
| 31 | 7 | 0 | 0.518173  | -1.934841 | -0.777951 |
| 32 | 6 | 0 | -1.231733 | 0.712210  | 1.472247  |
| 33 | 1 | 0 | -2.243960 | 0.786536  | 1.889372  |
| 34 | 1 | 0 | -0.751525 | 1.678829  | 1.634729  |
| 35 | 7 | 0 | -1.270930 | 0.467747  | -0.003367 |
| 36 | 6 | 0 | -1.523895 | 1.741969  | -0.718295 |
| 37 | 1 | 0 | -1.626694 | 1.495678  | -1.781028 |
| 38 | 1 | 0 | -2.452196 | 2.225351  | -0.387643 |
| 39 | 6 | 0 | -2.288805 | -0.568550 | -0.393127 |
| 40 | 1 | 0 | -2.147062 | -0.729701 | -1.464444 |
| 41 | 1 | 0 | -2.005390 | -1.496783 | 0.107410  |
| 42 | 6 | 0 | -3.741508 | -0.249024 | -0.095607 |
| 43 | 6 | 0 | -4.533979 | 0.434678  | -1.030202 |
| 44 | 6 | 0 | -4.335020 | -0.658634 | 1.108154  |
| 45 | 6 | 0 | -5.871560 | 0.724196  | -0.758708 |
| 46 | 1 | 0 | -4.107265 | 0.727106  | -1.986431 |
| 47 | 6 | 0 | -5.672400 | -0.370440 | 1.384356  |
| 48 | 1 | 0 | -3.752623 | -1.228084 | 1.829405  |
| 49 | 6 | 0 | -6.442238 | 0.327121  | 0.452233  |
| 50 | 1 | 0 | -6.470674 | 1.249270  | -1.496549 |
| 51 | 1 | 0 | -6.114821 | -0.699638 | 2.319747  |
| 52 | 1 | 0 | -7.484335 | 0.547794  | 0.661909  |
| 53 | 6 | 0 | -0.352564 | 2.670225  | -0.558003 |
| 54 | 6 | 0 | -0.489472 | 4.052223  | -0.666065 |
| 55 | 6 | 0 | 0.641577  | 4.861342  | -0.583531 |
| 56 | 1 | 0 | -1.474353 | 4.481495  | -0.820010 |
| 57 | 6 | 0 | 1.929875  | 2.863189  | -0.265686 |
| 58 | 6 | 0 | 1.876184  | 4.247921  | -0.379776 |
| 59 | 1 | 0 | 0.560385  | 5.939716  | -0.672913 |
| 60 | 1 | 0 | 2.878893  | 2.365891  | -0.112690 |
| 61 | 1 | 0 | 2.790476  | 4.826597  | -0.305947 |
| 62 | 7 | 0 | 0.843324  | 2.067411  | -0.353840 |
| 63 | 1 | 0 | 0.698927  | 0.286836  | -1.984430 |

-----  
**3''<sub>dp-A</sub>** (triplet) E(B3LYP/ SDD-6-31G(d,p))= -1444.49542330 hartree  
 -----

| Center<br>Number | Atomic<br>Number | Atomic<br>Type | Coordinates (Angstroms) |           |           |
|------------------|------------------|----------------|-------------------------|-----------|-----------|
|                  |                  |                | X                       | Y         | Z         |
| 1                | 7                | 0              | 0.867058                | -0.708373 | 1.395093  |
| 2                | 6                | 0              | 1.905132                | 0.095258  | 2.075014  |
| 3                | 1                | 0              | 1.529302                | 1.120696  | 2.163690  |
| 4                | 1                | 0              | 2.095538                | -0.268384 | 3.096864  |
| 5                | 6                | 0              | 1.256802                | -2.139284 | 1.344738  |
| 6                | 1                | 0              | 2.348385                | -2.197428 | 1.298061  |
| 7                | 1                | 0              | 0.952259                | -2.673956 | 2.255100  |
| 8                | 6                | 0              | -0.467587               | -0.553756 | 2.031997  |
| 9                | 1                | 0              | -1.021699               | -1.478804 | 1.853789  |
| 10               | 1                | 0              | -0.370409               | -0.452583 | 3.122853  |
| 11               | 26               | 0              | 0.791909                | -0.050860 | -0.776860 |
| 12               | 6                | 0              | 3.194995                | 0.095192  | 1.275514  |
| 13               | 6                | 0              | 4.447070                | 0.187153  | 1.885762  |
| 14               | 6                | 0              | 4.157077                | -0.033266 | -0.824454 |
| 15               | 6                | 0              | 5.589172                | 0.175574  | 1.084564  |
| 16               | 1                | 0              | 4.525142                | 0.259393  | 2.966246  |
| 17               | 6                | 0              | 5.444365                | 0.055618  | -0.297699 |
| 18               | 1                | 0              | 3.988273                | -0.122447 | -1.894518 |
| 19               | 1                | 0              | 6.574832                | 0.247170  | 1.533712  |
| 20               | 1                | 0              | 6.305974                | 0.028966  | -0.955890 |
| 21               | 6                | 0              | 0.712969                | -2.821384 | 0.112341  |
| 22               | 6                | 0              | 0.433766                | -4.185279 | 0.085536  |
| 23               | 6                | 0              | 0.033913                | -4.777997 | -1.112916 |
| 24               | 1                | 0              | 0.536256                | -4.774225 | 0.991454  |
| 25               | 6                | 0              | 0.205637                | -2.620414 | -2.146559 |
| 26               | 6                | 0              | -0.074507               | -3.979975 | -2.249653 |
| 27               | 1                | 0              | -0.185616               | -5.840053 | -1.155113 |
| 28               | 1                | 0              | 0.131923                | -1.953187 | -2.996088 |
| 29               | 1                | 0              | -0.374818               | -4.394454 | -3.205565 |
| 30               | 7                | 0              | 3.054626                | -0.005356 | -0.058707 |
| 31               | 7                | 0              | 0.586243                | -2.040010 | -0.988004 |
| 32               | 6                | 0              | -1.256577               | 0.625818  | 1.467766  |
| 33               | 1                | 0              | -2.215536               | 0.707671  | 1.999465  |
| 34               | 1                | 0              | -0.713219               | 1.556400  | 1.655344  |
| 35               | 7                | 0              | -1.435932               | 0.491874  | 0.010565  |
| 36               | 6                | 0              | -1.656616               | 1.786747  | -0.644450 |
| 37               | 1                | 0              | -1.887753               | 1.579871  | -1.697091 |
| 38               | 1                | 0              | -2.512685               | 2.337141  | -0.228397 |
| 39               | 6                | 0              | -2.469293               | -0.510488 | -0.384934 |
| 40               | 1                | 0              | -2.397205               | -0.606956 | -1.472739 |
| 41               | 1                | 0              | -2.168640               | -1.474426 | 0.034098  |

|    |   |   |           |           |           |
|----|---|---|-----------|-----------|-----------|
| 42 | 6 | 0 | -3.900791 | -0.202600 | 0.017287  |
| 43 | 6 | 0 | -4.737524 | 0.548139  | -0.821968 |
| 44 | 6 | 0 | -4.421939 | -0.669540 | 1.233359  |
| 45 | 6 | 0 | -6.048757 | 0.843362  | -0.447447 |
| 46 | 1 | 0 | -4.367420 | 0.889065  | -1.785817 |
| 47 | 6 | 0 | -5.732613 | -0.375425 | 1.612784  |
| 48 | 1 | 0 | -3.805001 | -1.287601 | 1.882175  |
| 49 | 6 | 0 | -6.547547 | 0.386572  | 0.774129  |
| 50 | 1 | 0 | -6.683799 | 1.419752  | -1.113532 |
| 51 | 1 | 0 | -6.119724 | -0.749608 | 2.555845  |
| 52 | 1 | 0 | -7.569246 | 0.611613  | 1.064259  |
| 53 | 6 | 0 | -0.423600 | 2.656076  | -0.614318 |
| 54 | 6 | 0 | -0.538502 | 4.046982  | -0.600463 |
| 55 | 6 | 0 | 0.605534  | 4.835023  | -0.686677 |
| 56 | 1 | 0 | -1.523164 | 4.498056  | -0.531022 |
| 57 | 6 | 0 | 1.876860  | 2.805700  | -0.769124 |
| 58 | 6 | 0 | 1.840012  | 4.195028  | -0.780148 |
| 59 | 1 | 0 | 0.534851  | 5.918005  | -0.683700 |
| 60 | 1 | 0 | 2.818865  | 2.280227  | -0.845422 |
| 61 | 1 | 0 | 2.765163  | 4.755222  | -0.860209 |
| 62 | 7 | 0 | 0.775127  | 2.031532  | -0.680286 |
| 63 | 1 | 0 | 0.724966  | 0.186550  | -2.320002 |

-----  
**3''<sub>dp-B</sub>** (quintet) E(B3LYP/ SDD-6-31G(d,p))= -1444.50261938 hartree

| Center<br>Number | Atomic<br>Number | Atomic<br>Type | Coordinates (Angstroms) |           |           |
|------------------|------------------|----------------|-------------------------|-----------|-----------|
|                  |                  |                | X                       | Y         | Z         |
| 1                | 7                | 0              | 1.492456                | 1.590279  | -1.132625 |
| 2                | 6                | 0              | 2.767332                | 1.191249  | -1.764326 |
| 3                | 1                | 0              | 2.787278                | 1.457352  | -2.831364 |
| 4                | 1                | 0              | 3.568995                | 1.762587  | -1.282762 |
| 5                | 6                | 0              | 1.526591                | 3.002658  | -0.690628 |
| 6                | 1                | 0              | 2.507677                | 3.183688  | -0.237021 |
| 7                | 1                | 0              | 1.425691                | 3.699681  | -1.535734 |
| 8                | 6                | 0              | 0.313842                | 1.335000  | -2.005797 |
| 9                | 1                | 0              | -0.472024               | 2.030799  | -1.702607 |
| 10               | 1                | 0              | 0.557817                | 1.571766  | -3.052138 |
| 11               | 26               | 0              | 1.336019                | 0.390183  | 0.855036  |
| 12               | 6                | 0              | 3.122143                | -0.274376 | -1.589041 |
| 13               | 6                | 0              | 4.011360                | -0.900634 | -2.465671 |
| 14               | 6                | 0              | 3.039750                | -2.154623 | -0.244391 |
| 15               | 6                | 0              | 4.426832                | -2.202485 | -2.193883 |

|    |   |   |           |           |           |
|----|---|---|-----------|-----------|-----------|
| 16 | 1 | 0 | 4.378050  | -0.369870 | -3.338859 |
| 17 | 6 | 0 | 3.939593  | -2.841280 | -1.052943 |
| 18 | 1 | 0 | 2.628195  | -2.610451 | 0.651297  |
| 19 | 1 | 0 | 5.121406  | -2.707376 | -2.857894 |
| 20 | 1 | 0 | 4.243557  | -3.849917 | -0.795677 |
| 21 | 6 | 0 | 0.479567  | 3.308854  | 0.364731  |
| 22 | 6 | 0 | -0.025381 | 4.600523  | 0.526175  |
| 23 | 6 | 0 | -0.892977 | 4.860608  | 1.585594  |
| 24 | 1 | 0 | 0.266061  | 5.388089  | -0.161742 |
| 25 | 6 | 0 | -0.706033 | 2.555963  | 2.203250  |
| 26 | 6 | 0 | -1.236566 | 3.818755  | 2.447430  |
| 27 | 1 | 0 | -1.293101 | 5.858427  | 1.735497  |
| 28 | 1 | 0 | -0.950917 | 1.712185  | 2.841749  |
| 29 | 1 | 0 | -1.905093 | 3.975754  | 3.286689  |
| 30 | 7 | 0 | 2.629261  | -0.901349 | -0.506776 |
| 31 | 7 | 0 | 0.130402  | 2.299679  | 1.183780  |
| 32 | 6 | 0 | -0.219215 | -0.098908 | -1.925498 |
| 33 | 1 | 0 | -1.044886 | -0.205598 | -2.642711 |
| 34 | 1 | 0 | 0.557067  | -0.800191 | -2.238635 |
| 35 | 7 | 0 | -0.623170 | -0.444560 | -0.550188 |
| 36 | 6 | 0 | -0.586050 | -1.889621 | -0.276291 |
| 37 | 1 | 0 | -1.465015 | -2.419144 | -0.666601 |
| 38 | 1 | 0 | 0.288084  | -2.304020 | -0.789290 |
| 39 | 6 | 0 | -1.934887 | 0.156780  | -0.145920 |
| 40 | 1 | 0 | -2.045299 | -0.035841 | 0.925042  |
| 41 | 1 | 0 | -1.843484 | 1.238297  | -0.255510 |
| 42 | 6 | 0 | -3.168200 | -0.329731 | -0.884944 |
| 43 | 6 | 0 | -3.923907 | -1.405062 | -0.393123 |
| 44 | 6 | 0 | -3.598074 | 0.301522  | -2.062434 |
| 45 | 6 | 0 | -5.057487 | -1.855122 | -1.071637 |
| 46 | 1 | 0 | -3.635449 | -1.879080 | 0.542225  |
| 47 | 6 | 0 | -4.729736 | -0.146286 | -2.745308 |
| 48 | 1 | 0 | -3.058782 | 1.168461  | -2.437238 |
| 49 | 6 | 0 | -5.458870 | -1.230532 | -2.253841 |
| 50 | 1 | 0 | -5.633133 | -2.684677 | -0.671987 |
| 51 | 1 | 0 | -5.049042 | 0.358492  | -3.652152 |
| 52 | 1 | 0 | -6.342932 | -1.576577 | -2.780414 |
| 53 | 6 | 0 | -0.432737 | -2.162466 | 1.208241  |
| 54 | 6 | 0 | -1.045001 | -3.251900 | 1.829016  |
| 55 | 6 | 0 | -0.810206 | -3.484575 | 3.184734  |
| 56 | 1 | 0 | -1.692858 | -3.906438 | 1.254370  |
| 57 | 6 | 0 | 0.603173  | -1.550665 | 3.195109  |
| 58 | 6 | 0 | 0.030758  | -2.618231 | 3.882176  |
| 59 | 1 | 0 | -1.277684 | -4.326228 | 3.686383  |



|    |   |   |          |           |          |
|----|---|---|----------|-----------|----------|
| 60 | 1 | 0 | 1.275121 | -0.847911 | 3.679944 |
| 61 | 1 | 0 | 0.242336 | -2.760820 | 4.936186 |
| 62 | 7 | 0 | 0.375955 | -1.324041 | 1.888727 |
| 63 | 1 | 0 | 2.477860 | 0.781265  | 2.014917 |

-----  
**3''<sub>dp-B</sub>** (singlet) E(B3LYP/ SDD-6-31G(d,p))= -1444.49929713 hartree  
 -----

| Center<br>Number | Atomic<br>Number | Atomic<br>Type | Coordinates (Angstroms) |           |           |
|------------------|------------------|----------------|-------------------------|-----------|-----------|
|                  |                  |                | X                       | Y         | Z         |
| 1                | 7                | 0              | 1.320571                | 1.474396  | -1.411675 |
| 2                | 6                | 0              | 2.619386                | 1.086154  | -2.013026 |
| 3                | 1                | 0              | 2.635305                | 1.252367  | -3.099057 |
| 4                | 1                | 0              | 3.387845                | 1.726943  | -1.568931 |
| 5                | 6                | 0              | 1.270501                | 2.914711  | -1.051640 |
| 6                | 1                | 0              | 2.271300                | 3.199619  | -0.713648 |
| 7                | 1                | 0              | 1.009877                | 3.550330  | -1.909333 |
| 8                | 6                | 0              | 0.151883                | 1.083481  | -2.267026 |
| 9                | 1                | 0              | -0.652480               | 1.794269  | -2.061567 |
| 10               | 1                | 0              | 0.401099                | 1.186472  | -3.331672 |
| 11               | 26               | 0              | 1.151933                | 0.450415  | 0.346382  |
| 12               | 6                | 0              | 2.990892                | -0.335765 | -1.670500 |
| 13               | 6                | 0              | 3.925310                | -1.048517 | -2.418340 |
| 14               | 6                | 0              | 2.880489                | -2.024062 | -0.094821 |
| 15               | 6                | 0              | 4.353777                | -2.296126 | -1.967839 |
| 16               | 1                | 0              | 4.321212                | -0.619579 | -3.333561 |
| 17               | 6                | 0              | 3.827034                | -2.784160 | -0.772925 |
| 18               | 1                | 0              | 2.453854                | -2.374191 | 0.837467  |
| 19               | 1                | 0              | 5.085648                | -2.866545 | -2.530277 |
| 20               | 1                | 0              | 4.137035                | -3.740886 | -0.367104 |
| 21               | 6                | 0              | 0.325652                | 3.139216  | 0.105208  |
| 22               | 6                | 0              | -0.283840               | 4.370048  | 0.336411  |
| 23               | 6                | 0              | -1.037779               | 4.552662  | 1.495488  |
| 24               | 1                | 0              | -0.155895               | 5.176763  | -0.378515 |
| 25               | 6                | 0              | -0.543024               | 2.277915  | 2.071634  |
| 26               | 6                | 0              | -1.159672               | 3.485159  | 2.383537  |
| 27               | 1                | 0              | -1.514671               | 5.505635  | 1.700104  |
| 28               | 1                | 0              | -0.625258               | 1.423019  | 2.733196  |
| 29               | 1                | 0              | -1.728562               | 3.576560  | 3.302332  |
| 30               | 7                | 0              | 2.446611                | -0.822168 | -0.528765 |
| 31               | 7                | 0              | 0.185833                | 2.090141  | 0.954010  |
| 32               | 6                | 0              | -0.339640               | -0.340183 | -1.977031 |
| 33               | 1                | 0              | -1.211036               | -0.559755 | -2.607180 |
| 34               | 1                | 0              | 0.433305                | -1.065754 | -2.236495 |

|    |   |   |           |           |           |
|----|---|---|-----------|-----------|-----------|
| 35 | 7 | 0 | -0.636691 | -0.474569 | -0.531803 |
| 36 | 6 | 0 | -0.532649 | -1.848269 | 0.008059  |
| 37 | 1 | 0 | -1.449367 | -2.431804 | -0.136248 |
| 38 | 1 | 0 | 0.262153  | -2.365067 | -0.538359 |
| 39 | 6 | 0 | -1.952633 | 0.146652  | -0.146364 |
| 40 | 1 | 0 | -1.993989 | 0.119054  | 0.945193  |
| 41 | 1 | 0 | -1.911204 | 1.200097  | -0.427170 |
| 42 | 6 | 0 | -3.201809 | -0.490840 | -0.723041 |
| 43 | 6 | 0 | -3.885079 | -1.495337 | -0.019989 |
| 44 | 6 | 0 | -3.726520 | -0.066600 | -1.953806 |
| 45 | 6 | 0 | -5.036839 | -2.082784 | -0.545281 |
| 46 | 1 | 0 | -3.526696 | -1.803342 | 0.959607  |
| 47 | 6 | 0 | -4.877448 | -0.651836 | -2.483251 |
| 48 | 1 | 0 | -3.247589 | 0.746626  | -2.494328 |
| 49 | 6 | 0 | -5.531118 | -1.667081 | -1.782769 |
| 50 | 1 | 0 | -5.554131 | -2.854950 | 0.016186  |
| 51 | 1 | 0 | -5.270204 | -0.306982 | -3.434993 |
| 52 | 1 | 0 | -6.429314 | -2.119898 | -2.191098 |
| 53 | 6 | 0 | -0.155736 | -1.795263 | 1.477710  |
| 54 | 6 | 0 | -0.589178 | -2.746321 | 2.399159  |
| 55 | 6 | 0 | -0.138372 | -2.677418 | 3.718722  |
| 56 | 1 | 0 | -1.267560 | -3.532191 | 2.082103  |
| 57 | 6 | 0 | 1.124192  | -0.730698 | 3.105832  |
| 58 | 6 | 0 | 0.735885  | -1.651361 | 4.075609  |
| 59 | 1 | 0 | -0.463369 | -3.410042 | 4.450518  |
| 60 | 1 | 0 | 1.809417  | 0.081574  | 3.322294  |
| 61 | 1 | 0 | 1.116759  | -1.560194 | 5.086970  |
| 62 | 7 | 0 | 0.689361  | -0.790096 | 1.830730  |
| 63 | 1 | 0 | 2.404461  | 1.076859  | 0.991851  |

-----  
**3''<sub>dp-B</sub>** (triplet) E(B3LYP/ SDD-6-31G(d,p))= -1444.48775308 hartree  
 -----

| Center<br>Number | Atomic<br>Number | Atomic<br>Type | Coordinates (Angstroms) |          |           |
|------------------|------------------|----------------|-------------------------|----------|-----------|
|                  |                  |                | X                       | Y        | Z         |
| 1                | 7                | 0              | 1.423577                | 1.730576 | -1.164075 |
| 2                | 6                | 0              | 2.687581                | 1.365619 | -1.816044 |
| 3                | 1                | 0              | 2.672101                | 1.591624 | -2.893235 |
| 4                | 1                | 0              | 3.483072                | 1.981073 | -1.381854 |
| 5                | 6                | 0              | 1.439408                | 3.069576 | -0.552800 |
| 6                | 1                | 0              | 2.444260                | 3.237664 | -0.151068 |
| 7                | 1                | 0              | 1.242400                | 3.869977 | -1.282629 |
| 8                | 6                | 0              | 0.230723                | 1.506084 | -2.010704 |
| 9                | 1                | 0              | -0.560403               | 2.172121 | -1.655633 |

|    |    |   |           |           |           |
|----|----|---|-----------|-----------|-----------|
| 10 | 1  | 0 | 0.430117  | 1.786837  | -3.056684 |
| 11 | 26 | 0 | 1.149734  | 0.309331  | 0.681492  |
| 12 | 6  | 0 | 3.099866  | -0.081702 | -1.604196 |
| 13 | 6  | 0 | 4.036749  | -0.675038 | -2.453530 |
| 14 | 6  | 0 | 3.069562  | -1.955972 | -0.251993 |
| 15 | 6  | 0 | 4.503239  | -1.955842 | -2.169941 |
| 16 | 1  | 0 | 4.399354  | -0.129293 | -3.319451 |
| 17 | 6  | 0 | 4.014689  | -2.606583 | -1.036522 |
| 18 | 1  | 0 | 2.663180  | -2.423435 | 0.638288  |
| 19 | 1  | 0 | 5.234372  | -2.432853 | -2.814841 |
| 20 | 1  | 0 | 4.354406  | -3.599514 | -0.762937 |
| 21 | 6  | 0 | 0.471870  | 3.186621  | 0.609770  |
| 22 | 6  | 0 | -0.096552 | 4.413020  | 0.955915  |
| 23 | 6  | 0 | -0.891737 | 4.503391  | 2.096851  |
| 24 | 1  | 0 | 0.092025  | 5.285620  | 0.338224  |
| 25 | 6  | 0 | -0.510989 | 2.165060  | 2.444577  |
| 26 | 6  | 0 | -1.098621 | 3.354253  | 2.860226  |
| 27 | 1  | 0 | -1.338195 | 5.449869  | 2.384302  |
| 28 | 1  | 0 | -0.645410 | 1.247685  | 3.009436  |
| 29 | 1  | 0 | -1.704429 | 3.372947  | 3.759438  |
| 30 | 7  | 0 | 2.605459  | -0.720837 | -0.526503 |
| 31 | 7  | 0 | 0.252748  | 2.070786  | 1.338799  |
| 32 | 6  | 0 | -0.256815 | 0.055309  | -1.971127 |
| 33 | 1  | 0 | -1.114116 | -0.060582 | -2.646680 |
| 34 | 1  | 0 | 0.531282  | -0.603117 | -2.343893 |
| 35 | 7  | 0 | -0.584137 | -0.369649 | -0.587013 |
| 36 | 6  | 0 | -0.556606 | -1.846322 | -0.442601 |
| 37 | 1  | 0 | -1.448427 | -2.321617 | -0.867919 |
| 38 | 1  | 0 | 0.306655  | -2.214380 | -1.006514 |
| 39 | 6  | 0 | -1.898032 | 0.188037  | -0.103269 |
| 40 | 1  | 0 | -1.979658 | -0.099268 | 0.948430  |
| 41 | 1  | 0 | -1.810125 | 1.274984  | -0.121853 |
| 42 | 6  | 0 | -3.147937 | -0.238209 | -0.849914 |
| 43 | 6  | 0 | -3.888780 | -1.355543 | -0.434637 |
| 44 | 6  | 0 | -3.614654 | 0.498078  | -1.949745 |
| 45 | 6  | 0 | -5.043670 | -1.743657 | -1.115283 |
| 46 | 1  | 0 | -3.571847 | -1.912529 | 0.444001  |
| 47 | 6  | 0 | -4.768239 | 0.113051  | -2.633970 |
| 48 | 1  | 0 | -3.085239 | 1.395298  | -2.261948 |
| 49 | 6  | 0 | -5.482101 | -1.013415 | -2.221347 |
| 50 | 1  | 0 | -5.606992 | -2.607571 | -0.775430 |
| 51 | 1  | 0 | -5.115734 | 0.698188  | -3.480046 |
| 52 | 1  | 0 | -6.382773 | -1.311530 | -2.749045 |
| 53 | 6  | 0 | -0.378075 | -2.245685 | 1.007872  |

|    |   |   |           |           |          |
|----|---|---|-----------|-----------|----------|
| 54 | 6 | 0 | -1.004468 | -3.359221 | 1.566679 |
| 55 | 6 | 0 | -0.746359 | -3.686130 | 2.899283 |
| 56 | 1 | 0 | -1.681524 | -3.958949 | 0.966618 |
| 57 | 6 | 0 | 0.725951  | -1.797981 | 3.002548 |
| 58 | 6 | 0 | 0.132626  | -2.889789 | 3.632556 |
| 59 | 1 | 0 | -1.224768 | -4.547125 | 3.355546 |
| 60 | 1 | 0 | 1.433001  | -1.154872 | 3.517713 |
| 61 | 1 | 0 | 0.362512  | -3.108708 | 4.669571 |
| 62 | 7 | 0 | 0.476724  | -1.477875 | 1.719961 |
| 63 | 1 | 0 | 2.335425  | 0.645763  | 1.601197 |

-----  
**3''<sub>dp-c</sub>** (quintet) E(B3LYP/ SDD-6-31G(d,p))= -1444.49924549 hartree  
 -----

| Center<br>Number | Atomic<br>Number | Atomic<br>Type | Coordinates (Angstroms) |           |           |
|------------------|------------------|----------------|-------------------------|-----------|-----------|
|                  |                  |                | X                       | Y         | Z         |
| 1                | 7                | 0              | 1.238482                | -1.789995 | 0.490355  |
| 2                | 6                | 0              | 2.003277                | -1.484602 | 1.717082  |
| 3                | 1                | 0              | 1.697171                | -2.143381 | 2.541642  |
| 4                | 1                | 0              | 3.060249                | -1.706508 | 1.532399  |
| 5                | 6                | 0              | 2.047379                | -2.565115 | -0.475990 |
| 6                | 1                | 0              | 2.418001                | -3.507007 | -0.044739 |
| 7                | 1                | 0              | 1.393934                | -2.815610 | -1.319728 |
| 8                | 6                | 0              | -0.071303               | -2.417394 | 0.777416  |
| 9                | 1                | 0              | -0.420432               | -2.887642 | -0.144471 |
| 10               | 1                | 0              | 0.024898                | -3.215031 | 1.530187  |
| 11               | 26               | 0              | 0.725827                | 0.089700  | -0.766969 |
| 12               | 6                | 0              | 1.930711                | -0.038248 | 2.173333  |
| 13               | 6                | 0              | 2.367542                | 0.305416  | 3.457630  |
| 14               | 6                | 0              | 1.530911                | 2.180193  | 1.665888  |
| 15               | 6                | 0              | 2.388611                | 1.644417  | 3.833925  |
| 16               | 1                | 0              | 2.690878                | -0.470644 | 4.144912  |
| 17               | 6                | 0              | 1.967771                | 2.607100  | 2.914413  |
| 18               | 1                | 0              | 1.180873                | 2.889887  | 0.923667  |
| 19               | 1                | 0              | 2.727290                | 1.932780  | 4.824179  |
| 20               | 1                | 0              | 1.971841                | 3.663727  | 3.158418  |
| 21               | 6                | 0              | 3.205154                | -1.743868 | -1.011268 |
| 22               | 6                | 0              | 4.402706                | -2.341257 | -1.407467 |
| 23               | 6                | 0              | 5.403970                | -1.545792 | -1.962994 |
| 24               | 1                | 0              | 4.543782                | -3.410758 | -1.285903 |
| 25               | 6                | 0              | 3.964593                | 0.342112  | -1.658571 |
| 26               | 6                | 0              | 5.182477                | -0.175040 | -2.092039 |
| 27               | 1                | 0              | 6.341695                | -1.988132 | -2.284389 |
| 28               | 1                | 0              | 3.749781                | 1.404176  | -1.737994 |

|    |   |   |           |           |           |
|----|---|---|-----------|-----------|-----------|
| 29 | 1 | 0 | 5.934710  | 0.482210  | -2.514246 |
| 30 | 7 | 0 | 1.505410  | 0.885458  | 1.295281  |
| 31 | 7 | 0 | 2.993968  | -0.419371 | -1.131566 |
| 32 | 6 | 0 | -1.103552 | -1.391923 | 1.259300  |
| 33 | 1 | 0 | -2.023400 | -1.913864 | 1.553287  |
| 34 | 1 | 0 | -0.729606 | -0.889326 | 2.156469  |
| 35 | 7 | 0 | -1.357578 | -0.362595 | 0.227403  |
| 36 | 6 | 0 | -1.840476 | 0.912907  | 0.792150  |
| 37 | 1 | 0 | -2.898273 | 0.870561  | 1.081771  |
| 38 | 1 | 0 | -1.265754 | 1.113744  | 1.703132  |
| 39 | 6 | 0 | -2.244206 | -0.851598 | -0.888595 |
| 40 | 1 | 0 | -2.241421 | -0.068657 | -1.650330 |
| 41 | 1 | 0 | -1.739760 | -1.704172 | -1.346614 |
| 42 | 6 | 0 | -3.665333 | -1.215388 | -0.506122 |
| 43 | 6 | 0 | -4.691897 | -0.260011 | -0.565224 |
| 44 | 6 | 0 | -3.995105 | -2.521624 | -0.112347 |
| 45 | 6 | 0 | -6.001086 | -0.590228 | -0.212348 |
| 46 | 1 | 0 | -4.468454 | 0.744696  | -0.916084 |
| 47 | 6 | 0 | -5.302835 | -2.856122 | 0.242166  |
| 48 | 1 | 0 | -3.228099 | -3.292699 | -0.107778 |
| 49 | 6 | 0 | -6.307918 | -1.888376 | 0.199307  |
| 50 | 1 | 0 | -6.783123 | 0.160950  | -0.271417 |
| 51 | 1 | 0 | -5.539088 | -3.873771 | 0.538333  |
| 52 | 1 | 0 | -7.326874 | -2.148437 | 0.469054  |
| 53 | 6 | 0 | -1.615732 | 2.054343  | -0.182199 |
| 54 | 6 | 0 | -2.530010 | 3.100323  | -0.319845 |
| 55 | 6 | 0 | -2.257187 | 4.129038  | -1.221049 |
| 56 | 1 | 0 | -3.442973 | 3.101081  | 0.267169  |
| 57 | 6 | 0 | -0.224210 | 2.996683  | -1.780334 |
| 58 | 6 | 0 | -1.083242 | 4.075079  | -1.971929 |
| 59 | 1 | 0 | -2.955678 | 4.950813  | -1.344486 |
| 60 | 1 | 0 | 0.692501  | 2.899509  | -2.354815 |
| 61 | 1 | 0 | -0.838026 | 4.844082  | -2.696074 |
| 62 | 7 | 0 | -0.472417 | 2.014787  | -0.897128 |
| 63 | 1 | 0 | 0.480768  | -0.418930 | -2.340528 |

-----

**3''<sub>dp-c</sub>** (singlet) E(B3LYP/ SDD-6-31G(d,p))= -1444.49385030 hartree

| Center<br>Number | Atomic<br>Number | Atomic<br>Type | Coordinates (Angstroms) |           |           |
|------------------|------------------|----------------|-------------------------|-----------|-----------|
|                  |                  |                | X                       | Y         | Z         |
| 1                | 7                | 0              | 1.056627                | -1.987077 | -0.029074 |
| 2                | 6                | 0              | 1.903843                | -2.133206 | 1.190157  |

|    |    |   |           |           |           |
|----|----|---|-----------|-----------|-----------|
| 3  | 1  | 0 | 1.600243  | -3.014115 | 1.769791  |
| 4  | 1  | 0 | 2.935081  | -2.319858 | 0.872355  |
| 5  | 6  | 0 | 1.805300  | -2.416620 | -1.240045 |
| 6  | 1  | 0 | 2.266640  | -3.407747 | -1.121073 |
| 7  | 1  | 0 | 1.091090  | -2.455033 | -2.066710 |
| 8  | 6  | 0 | -0.281977 | -2.615376 | 0.147660  |
| 9  | 1  | 0 | -0.683825 | -2.823902 | -0.845272 |
| 10 | 1  | 0 | -0.208609 | -3.573498 | 0.681120  |
| 11 | 26 | 0 | 0.654176  | -0.021174 | -0.425949 |
| 12 | 6  | 0 | 1.917205  | -0.901169 | 2.066349  |
| 13 | 6  | 0 | 2.487137  | -0.933636 | 3.340410  |
| 14 | 6  | 0 | 1.520077  | 1.368101  | 2.243047  |
| 15 | 6  | 0 | 2.573401  | 0.244301  | 4.078147  |
| 16 | 1  | 0 | 2.863824  | -1.869942 | 3.740838  |
| 17 | 6  | 0 | 2.086936  | 1.422878  | 3.511023  |
| 18 | 1  | 0 | 1.122807  | 2.260956  | 1.772171  |
| 19 | 1  | 0 | 3.013937  | 0.243749  | 5.069964  |
| 20 | 1  | 0 | 2.139160  | 2.368535  | 4.039357  |
| 21 | 6  | 0 | 2.852087  | -1.366018 | -1.544608 |
| 22 | 6  | 0 | 4.065312  | -1.667730 | -2.156141 |
| 23 | 6  | 0 | 4.970290  | -0.640112 | -2.425992 |
| 24 | 1  | 0 | 4.295151  | -2.695630 | -2.418491 |
| 25 | 6  | 0 | 3.412530  | 0.878979  | -1.419434 |
| 26 | 6  | 0 | 4.638063  | 0.657181  | -2.041918 |
| 27 | 1  | 0 | 5.917435  | -0.852115 | -2.911240 |
| 28 | 1  | 0 | 3.128314  | 1.871529  | -1.087150 |
| 29 | 1  | 0 | 5.314426  | 1.487930  | -2.210879 |
| 30 | 7  | 0 | 1.419876  | 0.230002  | 1.525028  |
| 31 | 7  | 0 | 2.517163  | -0.098100 | -1.188955 |
| 32 | 6  | 0 | -1.214266 | -1.659364 | 0.906194  |
| 33 | 1  | 0 | -2.192305 | -2.129525 | 1.062344  |
| 34 | 1  | 0 | -0.802332 | -1.439083 | 1.894982  |
| 35 | 7  | 0 | -1.317041 | -0.383910 | 0.151132  |
| 36 | 6  | 0 | -1.639707 | 0.812229  | 0.964993  |
| 37 | 1  | 0 | -2.708297 | 0.895738  | 1.194526  |
| 38 | 1  | 0 | -1.107338 | 0.729547  | 1.917159  |
| 39 | 6  | 0 | -2.273952 | -0.497751 | -1.019636 |
| 40 | 1  | 0 | -2.148406 | 0.416424  | -1.600861 |
| 41 | 1  | 0 | -1.902364 | -1.303230 | -1.651561 |
| 42 | 6  | 0 | -3.733463 | -0.718605 | -0.673976 |
| 43 | 6  | 0 | -4.608419 | 0.368264  | -0.518560 |
| 44 | 6  | 0 | -4.257434 | -2.014816 | -0.547340 |
| 45 | 6  | 0 | -5.954982 | 0.168761  | -0.211422 |
| 46 | 1  | 0 | -4.236747 | 1.379744  | -0.664967 |

|    |   |   |           |           |           |
|----|---|---|-----------|-----------|-----------|
| 47 | 6 | 0 | -5.603158 | -2.219440 | -0.239511 |
| 48 | 1 | 0 | -3.614065 | -2.874947 | -0.717950 |
| 49 | 6 | 0 | -6.453713 | -1.126714 | -0.063538 |
| 50 | 1 | 0 | -6.616805 | 1.022582  | -0.100784 |
| 51 | 1 | 0 | -5.989743 | -3.230289 | -0.150846 |
| 52 | 1 | 0 | -7.502141 | -1.284135 | 0.170315  |
| 53 | 6 | 0 | -1.159980 | 2.034670  | 0.204460  |
| 54 | 6 | 0 | -1.819010 | 3.261030  | 0.258434  |
| 55 | 6 | 0 | -1.332760 | 4.335273  | -0.487409 |
| 56 | 1 | 0 | -2.707935 | 3.365282  | 0.872661  |
| 57 | 6 | 0 | 0.393316  | 2.880680  | -1.298593 |
| 58 | 6 | 0 | -0.210085 | 4.134507  | -1.289282 |
| 59 | 1 | 0 | -1.831110 | 5.298816  | -0.458141 |
| 60 | 1 | 0 | 1.248298  | 2.675488  | -1.932378 |
| 61 | 1 | 0 | 0.190919  | 4.928764  | -1.909383 |
| 62 | 7 | 0 | -0.045357 | 1.847363  | -0.553684 |
| 63 | 1 | 0 | 0.201697  | -0.317252 | -1.867158 |

-----

$3''_{dp-c}$  (triplet) E(B3LYP/ SDD-6-31G(d,p))= -1444.48944592 hartree

| Center<br>Number | Atomic<br>Number | Atomic<br>Type | Coordinates (Angstroms) |           |           |
|------------------|------------------|----------------|-------------------------|-----------|-----------|
|                  |                  |                | X                       | Y         | Z         |
| 1                | 7                | 0              | 1.137903                | -1.900571 | 0.410455  |
| 2                | 6                | 0              | 1.932262                | -1.714137 | 1.643046  |
| 3                | 1                | 0              | 1.604847                | -2.408522 | 2.429180  |
| 4                | 1                | 0              | 2.975545                | -1.974343 | 1.429546  |
| 5                | 6                | 0              | 1.903651                | -2.609330 | -0.633158 |
| 6                | 1                | 0              | 2.318154                | -3.564533 | -0.276272 |
| 7                | 1                | 0              | 1.212770                | -2.829642 | -1.453534 |
| 8                | 6                | 0              | -0.191336               | -2.493240 | 0.669741  |
| 9                | 1                | 0              | -0.560452               | -2.904777 | -0.271895 |
| 10               | 1                | 0              | -0.123709               | -3.329594 | 1.382446  |
| 11               | 26               | 0              | 0.820441                | 0.152312  | -0.558809 |
| 12               | 6                | 0              | 1.929720                | -0.297010 | 2.184555  |
| 13               | 6                | 0              | 2.381546                | -0.045237 | 3.482334  |
| 14               | 6                | 0              | 1.631613                | 1.965936  | 1.805861  |
| 15               | 6                | 0              | 2.463824                | 1.267123  | 3.939071  |
| 16               | 1                | 0              | 2.669624                | -0.874701 | 4.121051  |
| 17               | 6                | 0              | 2.087103                | 2.296753  | 3.076101  |
| 18               | 1                | 0              | 1.315762                | 2.735640  | 1.110267  |
| 19               | 1                | 0              | 2.814399                | 1.481590  | 4.943569  |
| 20               | 1                | 0              | 2.137240                | 3.336954  | 3.378594  |

|    |   |   |           |           |           |
|----|---|---|-----------|-----------|-----------|
| 21 | 6 | 0 | 3.013077  | -1.732358 | -1.176276 |
| 22 | 6 | 0 | 4.212734  | -2.264294 | -1.647582 |
| 23 | 6 | 0 | 5.172218  | -1.410750 | -2.190230 |
| 24 | 1 | 0 | 4.386565  | -3.334314 | -1.591097 |
| 25 | 6 | 0 | 3.689845  | 0.412778  | -1.729663 |
| 26 | 6 | 0 | 4.905227  | -0.042699 | -2.229957 |
| 27 | 1 | 0 | 6.110120  | -1.804889 | -2.568071 |
| 28 | 1 | 0 | 3.446197  | 1.470978  | -1.740138 |
| 29 | 1 | 0 | 5.621769  | 0.662736  | -2.635956 |
| 30 | 7 | 0 | 1.543151  | 0.695945  | 1.354910  |
| 31 | 7 | 0 | 2.756195  | -0.407631 | -1.215342 |
| 32 | 6 | 0 | -1.181301 | -1.451525 | 1.201060  |
| 33 | 1 | 0 | -2.123904 | -1.948572 | 1.467080  |
| 34 | 1 | 0 | -0.789464 | -1.011754 | 2.123559  |
| 35 | 7 | 0 | -1.374455 | -0.369110 | 0.219624  |
| 36 | 6 | 0 | -1.774720 | 0.911012  | 0.823636  |
| 37 | 1 | 0 | -2.839730 | 0.948070  | 1.088731  |
| 38 | 1 | 0 | -1.207833 | 1.034891  | 1.753093  |
| 39 | 6 | 0 | -2.270893 | -0.753987 | -0.921425 |
| 40 | 1 | 0 | -2.209585 | 0.058880  | -1.648225 |
| 41 | 1 | 0 | -1.815569 | -1.618095 | -1.407825 |
| 42 | 6 | 0 | -3.718059 | -1.045711 | -0.571656 |
| 43 | 6 | 0 | -4.684518 | -0.028398 | -0.602652 |
| 44 | 6 | 0 | -4.131811 | -2.343314 | -0.232419 |
| 45 | 6 | 0 | -6.015489 | -0.291191 | -0.274995 |
| 46 | 1 | 0 | -4.396428 | 0.973772  | -0.911485 |
| 47 | 6 | 0 | -5.461310 | -2.611002 | 0.097043  |
| 48 | 1 | 0 | -3.413250 | -3.159648 | -0.250878 |
| 49 | 6 | 0 | -6.405409 | -1.582871 | 0.083138  |
| 50 | 1 | 0 | -6.749715 | 0.508199  | -0.311531 |
| 51 | 1 | 0 | -5.762048 | -3.622973 | 0.351492  |
| 52 | 1 | 0 | -7.441219 | -1.790327 | 0.333716  |
| 53 | 6 | 0 | -1.434491 | 2.059087  | -0.106604 |
| 54 | 6 | 0 | -2.257563 | 3.178243  | -0.237366 |
| 55 | 6 | 0 | -1.883402 | 4.209516  | -1.097523 |
| 56 | 1 | 0 | -3.182512 | 3.230963  | 0.328181  |
| 57 | 6 | 0 | 0.070820  | 2.935493  | -1.638536 |
| 58 | 6 | 0 | -0.695588 | 4.082016  | -1.817651 |
| 59 | 1 | 0 | -2.511479 | 5.087067  | -1.213157 |
| 60 | 1 | 0 | 0.992176  | 2.788512  | -2.193869 |
| 61 | 1 | 0 | -0.368868 | 4.848006  | -2.512240 |
| 62 | 7 | 0 | -0.276145 | 1.945283  | -0.793823 |
| 63 | 1 | 0 | 0.326074  | -0.302519 | -1.943433 |



TS''<sub>A</sub> (quintet) E(B3LYP/ SDD-6-31G(d,p))= -1444.81170512 hartree

| Center<br>Number | Atomic<br>Number | Atomic<br>Type | Coordinates (Angstroms) |           |           |
|------------------|------------------|----------------|-------------------------|-----------|-----------|
|                  |                  |                | X                       | Y         | Z         |
| 1                | 7                | 0              | -1.766377               | -1.078557 | -1.235047 |
| 2                | 6                | 0              | -2.540503               | -0.289476 | -2.221227 |
| 3                | 1                | 0              | -1.843018               | 0.149626  | -2.941864 |
| 4                | 1                | 0              | -3.222500               | -0.924422 | -2.800907 |
| 5                | 6                | 0              | -2.614343               | -2.110056 | -0.587115 |
| 6                | 1                | 0              | -3.640512               | -1.725348 | -0.557539 |
| 7                | 1                | 0              | -2.641321               | -3.033399 | -1.180044 |
| 8                | 6                | 0              | -0.505087               | -1.643857 | -1.782955 |
| 9                | 1                | 0              | -0.178641               | -2.434142 | -1.102054 |
| 10               | 1                | 0              | -0.670997               | -2.116202 | -2.761154 |
| 11               | 26               | 0              | -1.059630               | 0.314926  | 0.352718  |
| 12               | 6                | 0              | -3.303766               | 0.837689  | -1.548473 |
| 13               | 6                | 0              | -4.473970               | 1.362155  | -2.091794 |
| 14               | 6                | 0              | -3.360124               | 2.391194  | 0.190497  |
| 15               | 6                | 0              | -5.089259               | 2.446123  | -1.463891 |
| 16               | 1                | 0              | -4.895963               | 0.930512  | -2.993713 |
| 17               | 6                | 0              | -4.521954               | 2.972292  | -0.302264 |
| 18               | 1                | 0              | -2.886180               | 2.755071  | 1.096790  |
| 19               | 1                | 0              | -6.001094               | 2.869364  | -1.873267 |
| 20               | 1                | 0              | -4.971911               | 3.810510  | 0.217567  |
| 21               | 6                | 0              | -2.190463               | -2.402023 | 0.839441  |
| 22               | 6                | 0              | -2.475189               | -3.620696 | 1.451875  |
| 23               | 6                | 0              | -2.162482               | -3.792350 | 2.800937  |
| 24               | 1                | 0              | -2.941643               | -4.419171 | 0.883812  |
| 25               | 6                | 0              | -1.301936               | -1.558387 | 2.821670  |
| 26               | 6                | 0              | -1.569355               | -2.740439 | 3.501271  |
| 27               | 1                | 0              | -2.379819               | -4.732798 | 3.297374  |
| 28               | 1                | 0              | -0.837932               | -0.712324 | 3.318740  |
| 29               | 1                | 0              | -1.315830               | -2.831940 | 4.551378  |
| 30               | 7                | 0              | -2.757891               | 1.347240  | -0.418833 |
| 31               | 7                | 0              | -1.600463               | -1.390142 | 1.515876  |
| 32               | 6                | 0              | 0.579141                | -0.575941 | -1.926818 |
| 33               | 1                | 0              | 1.476403                | -1.027892 | -2.363023 |
| 34               | 1                | 0              | 0.244373                | 0.197001  | -2.624101 |
| 35               | 7                | 0              | 0.927161                | 0.112401  | -0.635009 |
| 36               | 6                | 0              | 1.632544                | 1.384736  | -1.015204 |
| 37               | 1                | 0              | 2.468067                | 1.140529  | -1.680991 |
| 38               | 1                | 0              | 0.919619                | 1.975391  | -1.603534 |

|    |   |   |           |           |           |
|----|---|---|-----------|-----------|-----------|
| 39 | 6 | 0 | 1.793424  | -0.776913 | 0.258768  |
| 40 | 1 | 0 | 1.992253  | -0.192439 | 1.159807  |
| 41 | 1 | 0 | 1.160311  | -1.616563 | 0.557445  |
| 42 | 6 | 0 | 3.086897  | -1.298211 | -0.331216 |
| 43 | 6 | 0 | 4.288918  | -0.591630 | -0.171462 |
| 44 | 6 | 0 | 3.119413  | -2.532515 | -1.001227 |
| 45 | 6 | 0 | 5.483289  | -1.088691 | -0.694242 |
| 46 | 1 | 0 | 4.299807  | 0.338021  | 0.390034  |
| 47 | 6 | 0 | 4.311869  | -3.030790 | -1.526297 |
| 48 | 1 | 0 | 2.213154  | -3.127681 | -1.090435 |
| 49 | 6 | 0 | 5.495777  | -2.305407 | -1.378900 |
| 50 | 1 | 0 | 6.406471  | -0.535393 | -0.553125 |
| 51 | 1 | 0 | 4.320097  | -3.989564 | -2.034938 |
| 52 | 1 | 0 | 6.426041  | -2.695269 | -1.779415 |
| 53 | 6 | 0 | 2.169319  | 2.272146  | 0.093637  |
| 54 | 6 | 0 | 3.372841  | 2.957818  | -0.086052 |
| 55 | 6 | 0 | 3.805342  | 3.856044  | 0.891642  |
| 56 | 1 | 0 | 3.962594  | 2.792806  | -0.981500 |
| 57 | 6 | 0 | 1.851972  | 3.322496  | 2.159097  |
| 58 | 6 | 0 | 3.034866  | 4.042593  | 2.039660  |
| 59 | 1 | 0 | 4.735810  | 4.398753  | 0.758442  |
| 60 | 1 | 0 | 1.205590  | 3.417890  | 3.027413  |
| 61 | 1 | 0 | 3.340035  | 4.726484  | 2.823500  |
| 62 | 7 | 0 | 1.437588  | 2.472862  | 1.205231  |
| 63 | 1 | 0 | 0.215877  | 1.825500  | 1.443076  |
| 64 | 1 | 0 | -0.591966 | 1.424958  | 1.683890  |

-----  
**TS''<sub>A</sub>** (singlet) E(B3LYP/ SDD-6-31G(d,p))= -1444.77570418 hartree

| Center<br>Number | Atomic<br>Number | Atomic<br>Type | Coordinates (Angstroms) |           |           |
|------------------|------------------|----------------|-------------------------|-----------|-----------|
|                  |                  |                | X                       | Y         | Z         |
| 1                | 7                | 0              | -1.628277               | -1.448181 | -0.940381 |
| 2                | 6                | 0              | -2.644761               | -1.147994 | -1.989417 |
| 3                | 1                | 0              | -2.121547               | -0.766838 | -2.874387 |
| 4                | 1                | 0              | -3.181768               | -2.052223 | -2.302689 |
| 5                | 6                | 0              | -2.239258               | -2.250448 | 0.165873  |
| 6                | 1                | 0              | -3.319647               | -2.073910 | 0.161628  |
| 7                | 1                | 0              | -2.093411               | -3.323169 | -0.002535 |
| 8                | 6                | 0              | -0.390580               | -2.091388 | -1.476988 |
| 9                | 1                | 0              | 0.022126                | -2.723769 | -0.689110 |
| 10               | 1                | 0              | -0.622220               | -2.746276 | -2.325555 |
| 11               | 26               | 0              | -1.131753               | 0.365141  | -0.174415 |

|    |   |   |           |           |           |
|----|---|---|-----------|-----------|-----------|
| 12 | 6 | 0 | -3.597001 | -0.096764 | -1.454249 |
| 13 | 6 | 0 | -4.902972 | 0.048893  | -1.909531 |
| 14 | 6 | 0 | -3.849749 | 1.691024  | 0.022499  |
| 15 | 6 | 0 | -5.696486 | 1.065190  | -1.373418 |
| 16 | 1 | 0 | -5.293279 | -0.620620 | -2.669141 |
| 17 | 6 | 0 | -5.161195 | 1.897439  | -0.389749 |
| 18 | 1 | 0 | -3.390106 | 2.309899  | 0.784475  |
| 19 | 1 | 0 | -6.717936 | 1.199326  | -1.714696 |
| 20 | 1 | 0 | -5.746718 | 2.694069  | 0.055151  |
| 21 | 6 | 0 | -1.694682 | -1.814091 | 1.504073  |
| 22 | 6 | 0 | -1.746800 | -2.618108 | 2.639870  |
| 23 | 6 | 0 | -1.314295 | -2.099320 | 3.860237  |
| 24 | 1 | 0 | -2.128107 | -3.631683 | 2.568855  |
| 25 | 6 | 0 | -0.797661 | -0.048436 | 2.729536  |
| 26 | 6 | 0 | -0.837529 | -0.788619 | 3.905077  |
| 27 | 1 | 0 | -1.350015 | -2.706644 | 4.758796  |
| 28 | 1 | 0 | -0.425755 | 0.969110  | 2.714218  |
| 29 | 1 | 0 | -0.496708 | -0.342957 | 4.832805  |
| 30 | 7 | 0 | -3.075265 | 0.715606  | -0.497710 |
| 31 | 7 | 0 | -1.214095 | -0.548430 | 1.547723  |
| 32 | 6 | 0 | 0.614908  | -1.025988 | -1.889629 |
| 33 | 1 | 0 | 1.537657  | -1.495696 | -2.247966 |
| 34 | 1 | 0 | 0.213300  | -0.441939 | -2.725493 |
| 35 | 7 | 0 | 0.903509  | -0.065985 | -0.767899 |
| 36 | 6 | 0 | 1.621111  | 1.094259  | -1.402288 |
| 37 | 1 | 0 | 2.511809  | 0.723250  | -1.920561 |
| 38 | 1 | 0 | 0.952583  | 1.501371  | -2.171870 |
| 39 | 6 | 0 | 1.765263  | -0.710681 | 0.314788  |
| 40 | 1 | 0 | 1.893006  | 0.053907  | 1.083529  |
| 41 | 1 | 0 | 1.159068  | -1.502152 | 0.757629  |
| 42 | 6 | 0 | 3.110886  | -1.264360 | -0.107982 |
| 43 | 6 | 0 | 4.279074  | -0.500078 | 0.038488  |
| 44 | 6 | 0 | 3.230680  | -2.578065 | -0.591964 |
| 45 | 6 | 0 | 5.523654  | -1.018679 | -0.321483 |
| 46 | 1 | 0 | 4.221491  | 0.497476  | 0.464350  |
| 47 | 6 | 0 | 4.472607  | -3.097979 | -0.956986 |
| 48 | 1 | 0 | 2.353964  | -3.218406 | -0.657793 |
| 49 | 6 | 0 | 5.621790  | -2.315297 | -0.829185 |
| 50 | 1 | 0 | 6.417859  | -0.417156 | -0.191187 |
| 51 | 1 | 0 | 4.545535  | -4.116832 | -1.323993 |
| 52 | 1 | 0 | 6.589907  | -2.720895 | -1.104892 |
| 53 | 6 | 0 | 2.040188  | 2.235412  | -0.496155 |
| 54 | 6 | 0 | 3.273050  | 2.868409  | -0.662210 |
| 55 | 6 | 0 | 3.575573  | 3.987353  | 0.116784  |

|    |   |   |           |          |           |
|----|---|---|-----------|----------|-----------|
| 56 | 1 | 0 | 3.982110  | 2.493840 | -1.392796 |
| 57 | 6 | 0 | 1.438571  | 3.761363 | 1.165275  |
| 58 | 6 | 0 | 2.645434  | 4.443276 | 1.051850  |
| 59 | 1 | 0 | 4.526786  | 4.495496 | -0.005898 |
| 60 | 1 | 0 | 0.669265  | 4.073316 | 1.866489  |
| 61 | 1 | 0 | 2.845155  | 5.307817 | 1.674799  |
| 62 | 7 | 0 | 1.154791  | 2.692111 | 0.405146  |
| 63 | 1 | 0 | -0.133394 | 2.067834 | 0.427900  |
| 64 | 1 | 0 | -1.019014 | 1.847011 | 0.497879  |

-----  
**TS''<sub>A</sub>** (triplet) E(B3LYP/ SDD-6-31G(d,p))= -1444.79881233 hartree  
 -----

| Center<br>Number | Atomic<br>Number | Atomic<br>Type | Coordinates (Angstroms) |           |           |
|------------------|------------------|----------------|-------------------------|-----------|-----------|
|                  |                  |                | X                       | Y         | Z         |
| 1                | 7                | 0              | -1.651825               | -1.107801 | -1.220501 |
| 2                | 6                | 0              | -2.423972               | -0.314313 | -2.224990 |
| 3                | 1                | 0              | -1.718353               | 0.132564  | -2.931419 |
| 4                | 1                | 0              | -3.084849               | -0.963906 | -2.810557 |
| 5                | 6                | 0              | -2.522578               | -2.176344 | -0.637614 |
| 6                | 1                | 0              | -3.537627               | -1.770424 | -0.557261 |
| 7                | 1                | 0              | -2.573522               | -3.042756 | -1.307924 |
| 8                | 6                | 0              | -0.400993               | -1.689015 | -1.801081 |
| 9                | 1                | 0              | -0.066577               | -2.478699 | -1.123807 |
| 10               | 1                | 0              | -0.604201               | -2.157279 | -2.772801 |
| 11               | 26               | 0              | -1.081260               | 0.115315  | 0.299335  |
| 12               | 6                | 0              | -3.193084               | 0.792926  | -1.542395 |
| 13               | 6                | 0              | -4.348428               | 1.353805  | -2.077413 |
| 14               | 6                | 0              | -3.233960               | 2.281381  | 0.252459  |
| 15               | 6                | 0              | -4.950117               | 2.424697  | -1.413466 |
| 16               | 1                | 0              | -4.769904               | 0.962950  | -2.997788 |
| 17               | 6                | 0              | -4.382301               | 2.897988  | -0.229908 |
| 18               | 1                | 0              | -2.763558               | 2.604445  | 1.174446  |
| 19               | 1                | 0              | -5.851298               | 2.878750  | -1.813133 |
| 20               | 1                | 0              | -4.821795               | 3.724937  | 0.316251  |
| 21               | 6                | 0              | -2.050415               | -2.564045 | 0.742610  |
| 22               | 6                | 0              | -2.310911               | -3.807438 | 1.310766  |
| 23               | 6                | 0              | -1.917842               | -4.042043 | 2.629740  |
| 24               | 1                | 0              | -2.817656               | -4.575591 | 0.735781  |
| 25               | 6                | 0              | -1.037067               | -1.814463 | 2.702275  |
| 26               | 6                | 0              | -1.273259               | -3.027249 | 3.338902  |
| 27               | 1                | 0              | -2.112923               | -5.002687 | 3.095689  |
| 28               | 1                | 0              | -0.535927               | -0.997927 | 3.210626  |
| 29               | 1                | 0              | -0.956174               | -3.169547 | 4.365825  |

|    |   |   |           |           |           |
|----|---|---|-----------|-----------|-----------|
| 30 | 7 | 0 | -2.645004 | 1.249249  | -0.388865 |
| 31 | 7 | 0 | -1.413710 | -1.583841 | 1.426847  |
| 32 | 6 | 0 | 0.665880  | -0.613341 | -1.947113 |
| 33 | 1 | 0 | 1.591093  | -1.057214 | -2.329626 |
| 34 | 1 | 0 | 0.348952  | 0.130276  | -2.682855 |
| 35 | 7 | 0 | 0.912402  | 0.104822  | -0.653851 |
| 36 | 6 | 0 | 1.510973  | 1.434519  | -1.002234 |
| 37 | 1 | 0 | 2.423832  | 1.277667  | -1.587995 |
| 38 | 1 | 0 | 0.792841  | 1.941764  | -1.657603 |
| 39 | 6 | 0 | 1.834355  | -0.701486 | 0.261607  |
| 40 | 1 | 0 | 1.958598  | -0.099674 | 1.164336  |
| 41 | 1 | 0 | 1.274607  | -1.595951 | 0.546155  |
| 42 | 6 | 0 | 3.182029  | -1.102985 | -0.299546 |
| 43 | 6 | 0 | 4.303031  | -0.270262 | -0.157190 |
| 44 | 6 | 0 | 3.346198  | -2.346354 | -0.931981 |
| 45 | 6 | 0 | 5.545738  | -0.656592 | -0.660675 |
| 46 | 1 | 0 | 4.213029  | 0.672684  | 0.374922  |
| 47 | 6 | 0 | 4.587401  | -2.734447 | -1.437022 |
| 48 | 1 | 0 | 2.505097  | -3.032707 | -1.007668 |
| 49 | 6 | 0 | 5.688414  | -1.885754 | -1.307716 |
| 50 | 1 | 0 | 6.405645  | -0.006183 | -0.534865 |
| 51 | 1 | 0 | 4.698361  | -3.701710 | -1.916777 |
| 52 | 1 | 0 | 6.656604  | -2.188411 | -1.693515 |
| 53 | 6 | 0 | 1.836961  | 2.372416  | 0.144555  |
| 54 | 6 | 0 | 2.940929  | 3.224361  | 0.060865  |
| 55 | 6 | 0 | 3.166352  | 4.152638  | 1.078486  |
| 56 | 1 | 0 | 3.610704  | 3.164337  | -0.790840 |
| 57 | 6 | 0 | 1.221725  | 3.312627  | 2.185223  |
| 58 | 6 | 0 | 2.292410  | 4.200079  | 2.165116  |
| 59 | 1 | 0 | 4.016628  | 4.825100  | 1.024918  |
| 60 | 1 | 0 | 0.513358  | 3.296610  | 3.009770  |
| 61 | 1 | 0 | 2.436438  | 4.902126  | 2.978639  |
| 62 | 7 | 0 | 1.001386  | 2.432807  | 1.194926  |
| 63 | 1 | 0 | -0.161808 | 1.460553  | 1.348084  |
| 64 | 1 | 0 | -0.844399 | 0.993216  | 1.664848  |

-----

**TS''<sub>B</sub>** (quintet) E(B3LYP/ SDD-6-31G(d,p))= -1444.80950663 hartree

| Center<br>Number | Atomic<br>Number | Atomic<br>Type | Coordinates (Angstroms) |           |           |
|------------------|------------------|----------------|-------------------------|-----------|-----------|
|                  |                  |                | X                       | Y         | Z         |
| 1                | 7                | 0              | -1.505568               | -1.120086 | -0.732390 |
| 2                | 6                | 0              | -2.401463               | -0.866337 | -1.905473 |

|    |    |   |           |           |           |
|----|----|---|-----------|-----------|-----------|
| 3  | 1  | 0 | -1.845986 | -0.240164 | -2.610944 |
| 4  | 1  | 0 | -2.602535 | -1.816440 | -2.418571 |
| 5  | 6  | 0 | -2.206620 | -1.927671 | 0.298338  |
| 6  | 1  | 0 | -3.227337 | -1.542394 | 0.391690  |
| 7  | 1  | 0 | -2.294906 | -2.978572 | -0.009923 |
| 8  | 6  | 0 | -0.284713 | -1.842267 | -1.215704 |
| 9  | 1  | 0 | 0.136042  | -2.384296 | -0.365635 |
| 10 | 1  | 0 | -0.558406 | -2.595499 | -1.966850 |
| 11 | 26 | 0 | -0.508677 | 0.655912  | 0.407581  |
| 12 | 6  | 0 | -3.734581 | -0.201813 | -1.619440 |
| 13 | 6  | 0 | -4.910607 | -0.688494 | -2.191051 |
| 14 | 6  | 0 | -4.899727 | 1.576620  | -0.653059 |
| 15 | 6  | 0 | -6.108235 | 0.002466  | -1.986766 |
| 16 | 1  | 0 | -4.891250 | -1.589531 | -2.795277 |
| 17 | 6  | 0 | -6.106703 | 1.156879  | -1.205218 |
| 18 | 1  | 0 | -4.831988 | 2.463636  | -0.028939 |
| 19 | 1  | 0 | -7.029009 | -0.360897 | -2.431887 |
| 20 | 1  | 0 | -7.015173 | 1.719846  | -1.023195 |
| 21 | 6  | 0 | -1.556582 | -1.843757 | 1.665375  |
| 22 | 6  | 0 | -1.719842 | -2.863903 | 2.601807  |
| 23 | 6  | 0 | -1.191066 | -2.708608 | 3.882856  |
| 24 | 1  | 0 | -2.259417 | -3.765645 | 2.330935  |
| 25 | 6  | 0 | -0.361331 | -0.568421 | 3.210998  |
| 26 | 6  | 0 | -0.500831 | -1.535959 | 4.196302  |
| 27 | 1  | 0 | -1.313584 | -3.491926 | 4.624187  |
| 28 | 1  | 0 | 0.178655  | 0.353397  | 3.404058  |
| 29 | 1  | 0 | -0.074270 | -1.374833 | 5.179851  |
| 30 | 7  | 0 | -3.753531 | 0.913714  | -0.864719 |
| 31 | 7  | 0 | -0.876152 | -0.713379 | 1.968833  |
| 32 | 6  | 0 | 0.763645  | -0.894651 | -1.798907 |
| 33 | 1  | 0 | 1.591513  | -1.474869 | -2.220524 |
| 34 | 1  | 0 | 0.336811  | -0.311149 | -2.619124 |
| 35 | 7  | 0 | 1.251188  | 0.055419  | -0.761114 |
| 36 | 6  | 0 | 1.803343  | 1.307171  | -1.343764 |
| 37 | 1  | 0 | 2.812294  | 1.155517  | -1.741125 |
| 38 | 1  | 0 | 1.166655  | 1.599121  | -2.187443 |
| 39 | 6  | 0 | 2.258954  | -0.589082 | 0.189220  |
| 40 | 1  | 0 | 2.474696  | 0.163070  | 0.952309  |
| 41 | 1  | 0 | 1.739727  | -1.410674 | 0.688241  |
| 42 | 6  | 0 | 3.543594  | -1.085439 | -0.434098 |
| 43 | 6  | 0 | 4.668244  | -0.248652 | -0.516320 |
| 44 | 6  | 0 | 3.650159  | -2.404364 | -0.904108 |
| 45 | 6  | 0 | 5.857409  | -0.707777 | -1.083656 |
| 46 | 1  | 0 | 4.625686  | 0.758370  | -0.107428 |

|    |   |   |           |           |           |
|----|---|---|-----------|-----------|-----------|
| 47 | 6 | 0 | 4.838326  | -2.864995 | -1.472030 |
| 48 | 1 | 0 | 2.810776  | -3.088706 | -0.799952 |
| 49 | 6 | 0 | 5.941336  | -2.014278 | -1.569158 |
| 50 | 1 | 0 | 6.721290  | -0.052538 | -1.133195 |
| 51 | 1 | 0 | 4.908018  | -3.889211 | -1.824392 |
| 52 | 1 | 0 | 6.868110  | -2.373850 | -2.004601 |
| 53 | 6 | 0 | 1.787979  | 2.422717  | -0.316755 |
| 54 | 6 | 0 | 2.684288  | 3.488700  | -0.360972 |
| 55 | 6 | 0 | 2.563831  | 4.515524  | 0.575747  |
| 56 | 1 | 0 | 3.459305  | 3.513975  | -1.120123 |
| 57 | 6 | 0 | 0.694882  | 3.352396  | 1.517577  |
| 58 | 6 | 0 | 1.549667  | 4.447477  | 1.532956  |
| 59 | 1 | 0 | 3.251046  | 5.355453  | 0.559158  |
| 60 | 1 | 0 | -0.114043 | 3.263392  | 2.236816  |
| 61 | 1 | 0 | 1.421280  | 5.225536  | 2.276941  |
| 62 | 7 | 0 | 0.812278  | 2.355444  | 0.616280  |
| 63 | 1 | 0 | -2.572860 | 1.405073  | -0.224236 |
| 64 | 1 | 0 | -1.883183 | 1.792412  | 0.235662  |

-----  
**TS''<sub>b</sub>** (singlet) E(B3LYP/ SDD-6-31G(d,p))= -1444.77944050 hartree  
 -----

| Center<br>Number | Atomic<br>Number | Atomic<br>Type | Coordinates (Angstroms) |           |           |
|------------------|------------------|----------------|-------------------------|-----------|-----------|
|                  |                  |                | X                       | Y         | Z         |
| 1                | 7                | 0              | -1.401215               | -1.368256 | -0.488755 |
| 2                | 6                | 0              | -2.398761               | -1.414228 | -1.604398 |
| 3                | 1                | 0              | -1.913343               | -0.986607 | -2.489511 |
| 4                | 1                | 0              | -2.618281               | -2.461750 | -1.846919 |
| 5                | 6                | 0              | -1.958260               | -1.986319 | 0.750816  |
| 6                | 1                | 0              | -2.986335               | -1.632130 | 0.875475  |
| 7                | 1                | 0              | -2.001411               | -3.079629 | 0.664654  |
| 8                | 6                | 0              | -0.173601               | -2.129355 | -0.933452 |
| 9                | 1                | 0              | 0.298329                | -2.539670 | -0.038363 |
| 10               | 1                | 0              | -0.458365               | -2.979987 | -1.564421 |
| 11               | 26               | 0              | -0.626737               | 0.488890  | 0.093942  |
| 12               | 6                | 0              | -3.721898               | -0.700326 | -1.394181 |
| 13               | 6                | 0              | -4.886559               | -1.182529 | -1.991328 |
| 14               | 6                | 0              | -4.886351               | 1.146566  | -0.543177 |
| 15               | 6                | 0              | -6.072071               | -0.454960 | -1.863987 |
| 16               | 1                | 0              | -4.866771               | -2.110862 | -2.552903 |
| 17               | 6                | 0              | -6.075833               | 0.732292  | -1.129727 |
| 18               | 1                | 0              | -4.818488               | 2.048581  | 0.058096  |
| 19               | 1                | 0              | -6.983834               | -0.816892 | -2.328421 |
| 20               | 1                | 0              | -6.978619               | 1.319533  | -1.005986 |

|    |   |   |           |           |           |
|----|---|---|-----------|-----------|-----------|
| 21 | 6 | 0 | -1.152690 | -1.564610 | 1.956968  |
| 22 | 6 | 0 | -1.131685 | -2.304684 | 3.136797  |
| 23 | 6 | 0 | -0.439185 | -1.807520 | 4.240605  |
| 24 | 1 | 0 | -1.657052 | -3.252801 | 3.189687  |
| 25 | 6 | 0 | 0.171866  | 0.093194  | 2.912640  |
| 26 | 6 | 0 | 0.219552  | -0.582999 | 4.125853  |
| 27 | 1 | 0 | -0.414414 | -2.365429 | 5.170973  |
| 28 | 1 | 0 | 0.676676  | 1.042176  | 2.776472  |
| 29 | 1 | 0 | 0.768038  | -0.155899 | 4.957877  |
| 30 | 7 | 0 | -3.749722 | 0.445009  | -0.688394 |
| 31 | 7 | 0 | -0.497289 | -0.384651 | 1.843369  |
| 32 | 6 | 0 | 0.800921  | -1.214813 | -1.664649 |
| 33 | 1 | 0 | 1.679698  | -1.777110 | -1.997585 |
| 34 | 1 | 0 | 0.335269  | -0.796262 | -2.562261 |
| 35 | 7 | 0 | 1.174414  | -0.088967 | -0.761408 |
| 36 | 6 | 0 | 1.572091  | 1.143590  | -1.505496 |
| 37 | 1 | 0 | 2.606004  | 1.089013  | -1.860178 |
| 38 | 1 | 0 | 0.937211  | 1.226679  | -2.396699 |
| 39 | 6 | 0 | 2.267073  | -0.481569 | 0.228410  |
| 40 | 1 | 0 | 2.390160  | 0.379712  | 0.889077  |
| 41 | 1 | 0 | 1.861634  | -1.292760 | 0.834411  |
| 42 | 6 | 0 | 3.597447  | -0.884241 | -0.364837 |
| 43 | 6 | 0 | 4.608984  | 0.068018  | -0.571164 |
| 44 | 6 | 0 | 3.865814  | -2.227325 | -0.676047 |
| 45 | 6 | 0 | 5.841643  | -0.305889 | -1.107353 |
| 46 | 1 | 0 | 4.445390  | 1.103438  | -0.280446 |
| 47 | 6 | 0 | 5.097489  | -2.603328 | -1.212766 |
| 48 | 1 | 0 | 3.120637  | -2.992747 | -0.469470 |
| 49 | 6 | 0 | 6.084429  | -1.641106 | -1.436219 |
| 50 | 1 | 0 | 6.616721  | 0.439784  | -1.253405 |
| 51 | 1 | 0 | 5.292245  | -3.646307 | -1.441485 |
| 52 | 1 | 0 | 7.045463  | -1.933624 | -1.846897 |
| 53 | 6 | 0 | 1.346923  | 2.355038  | -0.625445 |
| 54 | 6 | 0 | 2.094904  | 3.524045  | -0.730539 |
| 55 | 6 | 0 | 1.770188  | 4.612437  | 0.080722  |
| 56 | 1 | 0 | 2.915751  | 3.580600  | -1.437874 |
| 57 | 6 | 0 | -0.000262 | 3.301855  | 1.027475  |
| 58 | 6 | 0 | 0.704209  | 4.498680  | 0.974806  |
| 59 | 1 | 0 | 2.340692  | 5.533447  | 0.016113  |
| 60 | 1 | 0 | -0.840935 | 3.166013  | 1.699042  |
| 61 | 1 | 0 | 0.418829  | 5.321651  | 1.620375  |
| 62 | 7 | 0 | 0.313439  | 2.243889  | 0.249098  |
| 63 | 1 | 0 | -2.675048 | 0.822044  | -0.004048 |
| 64 | 1 | 0 | -1.996336 | 1.168008  | 0.622789  |



-----  
TS''<sub>B</sub> (triplet) E(B3LYP/ SDD-6-31G(d,p))= -1444.79209343 hartree  
-----

| Center<br>Number | Atomic<br>Number | Atomic<br>Type | Coordinates (Angstroms) |           |           |
|------------------|------------------|----------------|-------------------------|-----------|-----------|
|                  |                  |                | X                       | Y         | Z         |
| 1                | 7                | 0              | -1.376403               | -1.136989 | -0.927675 |
| 2                | 6                | 0              | -2.322880               | -0.704508 | -2.000742 |
| 3                | 1                | 0              | -1.788385               | -0.000546 | -2.647961 |
| 4                | 1                | 0              | -2.578281               | -1.569926 | -2.626576 |
| 5                | 6                | 0              | -2.012888               | -2.176451 | -0.065090 |
| 6                | 1                | 0              | -3.025864               | -1.839532 | 0.175953  |
| 7                | 1                | 0              | -2.111009               | -3.122726 | -0.613184 |
| 8                | 6                | 0              | -0.137158               | -1.704911 | -1.571965 |
| 9                | 1                | 0              | 0.312053                | -2.397293 | -0.856989 |
| 10               | 1                | 0              | -0.401803               | -2.289706 | -2.462214 |
| 11               | 26               | 0              | -0.562981               | 0.398863  | 0.344045  |
| 12               | 6                | 0              | -3.620802               | -0.051342 | -1.555550 |
| 13               | 6                | 0              | -4.771300               | -0.182859 | -2.333905 |
| 14               | 6                | 0              | -4.751151               | 1.357194  | -0.068382 |
| 15               | 6                | 0              | -5.931593               | 0.498238  | -1.960847 |
| 16               | 1                | 0              | -4.759201               | -0.806188 | -3.222229 |
| 17               | 6                | 0              | -5.925132               | 1.285353  | -0.808213 |
| 18               | 1                | 0              | -4.681962               | 1.934744  | 0.849123  |
| 19               | 1                | 0              | -6.831668               | 0.407563  | -2.560546 |
| 20               | 1                | 0              | -6.808648               | 1.823251  | -0.483753 |
| 21               | 6                | 0              | -1.253800               | -2.382242 | 1.229401  |
| 22               | 6                | 0              | -1.341983               | -3.576348 | 1.943893  |
| 23               | 6                | 0              | -0.699131               | -3.675288 | 3.177772  |
| 24               | 1                | 0              | -1.909422               | -4.410749 | 1.544022  |
| 25               | 6                | 0              | 0.071074                | -1.427560 | 2.875563  |
| 26               | 6                | 0              | 0.017905                | -2.577665 | 3.655813  |
| 27               | 1                | 0              | -0.756797               | -4.592772 | 3.754545  |
| 28               | 1                | 0              | 0.624040                | -0.553874 | 3.207656  |
| 29               | 1                | 0              | 0.530326                | -2.609395 | 4.610815  |
| 30               | 7                | 0              | -3.635583               | 0.710028  | -0.446077 |
| 31               | 7                | 0              | -0.547673               | -1.327164 | 1.683314  |
| 32               | 6                | 0              | 0.852863                | -0.606201 | -1.933901 |
| 33               | 1                | 0              | 1.752304                | -1.035496 | -2.386899 |
| 34               | 1                | 0              | 0.418030                | 0.069556  | -2.675196 |
| 35               | 7                | 0              | 1.188743                | 0.196544  | -0.718107 |
| 36               | 6                | 0              | 1.581010                | 1.598134  | -1.070259 |
| 37               | 1                | 0              | 2.626423                | 1.652136  | -1.387613 |
| 38               | 1                | 0              | 0.969461                | 1.918265  | -1.921683 |

|    |   |   |           |           |           |
|----|---|---|-----------|-----------|-----------|
| 39 | 6 | 0 | 2.273739  | -0.466718 | 0.133614  |
| 40 | 1 | 0 | 2.349124  | 0.139919  | 1.040309  |
| 41 | 1 | 0 | 1.875984  | -1.438141 | 0.430518  |
| 42 | 6 | 0 | 3.632618  | -0.623073 | -0.508008 |
| 43 | 6 | 0 | 4.614821  | 0.369356  | -0.356142 |
| 44 | 6 | 0 | 3.955741  | -1.784388 | -1.228721 |
| 45 | 6 | 0 | 5.873428  | 0.221736  | -0.939728 |
| 46 | 1 | 0 | 4.406578  | 1.249784  | 0.247967  |
| 47 | 6 | 0 | 5.213385  | -1.933038 | -1.814284 |
| 48 | 1 | 0 | 3.233551  | -2.594109 | -1.308819 |
| 49 | 6 | 0 | 6.171190  | -0.926293 | -1.676844 |
| 50 | 1 | 0 | 6.625290  | 0.993184  | -0.806857 |
| 51 | 1 | 0 | 5.450717  | -2.838993 | -2.362826 |
| 52 | 1 | 0 | 7.152120  | -1.044644 | -2.125807 |
| 53 | 6 | 0 | 1.299695  | 2.518779  | 0.092056  |
| 54 | 6 | 0 | 2.028067  | 3.676641  | 0.347121  |
| 55 | 6 | 0 | 1.643441  | 4.500105  | 1.406598  |
| 56 | 1 | 0 | 2.879344  | 3.929762  | -0.275982 |
| 57 | 6 | 0 | -0.140935 | 2.969665  | 1.875898  |
| 58 | 6 | 0 | 0.541574  | 4.139827  | 2.184048  |
| 59 | 1 | 0 | 2.197365  | 5.408093  | 1.622831  |
| 60 | 1 | 0 | -1.002633 | 2.645560  | 2.447984  |
| 61 | 1 | 0 | 0.213086  | 4.752291  | 3.016099  |
| 62 | 7 | 0 | 0.228441  | 2.170992  | 0.850629  |
| 63 | 1 | 0 | -2.558367 | 0.750071  | 0.419391  |
| 64 | 1 | 0 | -1.937714 | 0.788730  | 1.142978  |

-----  
**TS''<sub>c</sub>** (quintet) E(B3LYP/ SDD-6-31G(d,p))= -1444.81209247 hartree  
 -----

| Center<br>Number | Atomic<br>Number | Atomic<br>Type | Coordinates (Angstroms) |           |           |
|------------------|------------------|----------------|-------------------------|-----------|-----------|
|                  |                  |                | X                       | Y         | Z         |
| 1                | 7                | 0              | 1.362043                | 1.234399  | -1.049614 |
| 2                | 6                | 0              | 2.323177                | 0.641742  | -2.022183 |
| 3                | 1                | 0              | 1.761219                | 0.031191  | -2.736374 |
| 4                | 1                | 0              | 2.823284                | 1.422423  | -2.610320 |
| 5                | 6                | 0              | 2.012828                | 2.440938  | -0.448157 |
| 6                | 1                | 0              | 2.961334                | 2.106348  | -0.013014 |
| 7                | 1                | 0              | 2.261860                | 3.155197  | -1.244474 |
| 8                | 6                | 0              | 0.071601                | 1.574673  | -1.713790 |
| 9                | 1                | 0              | -0.458462               | 2.272277  | -1.062051 |
| 10               | 1                | 0              | 0.240738                | 2.097019  | -2.666051 |
| 11               | 26               | 0              | 0.924109                | -0.604166 | 0.326605  |
| 12               | 6                | 0              | 3.348698                | -0.246624 | -1.349582 |

|    |   |   |           |           |           |
|----|---|---|-----------|-----------|-----------|
| 13 | 6 | 0 | 4.663493  | -0.337565 | -1.798903 |
| 14 | 6 | 0 | 3.742302  | -1.875050 | 0.272606  |
| 15 | 6 | 0 | 5.532376  | -1.240495 | -1.183587 |
| 16 | 1 | 0 | 5.001361  | 0.285816  | -2.620187 |
| 17 | 6 | 0 | 5.063519  | -2.025593 | -0.129409 |
| 18 | 1 | 0 | 3.336194  | -2.459747 | 1.091773  |
| 19 | 1 | 0 | 6.560604  | -1.326340 | -1.520478 |
| 20 | 1 | 0 | 5.706460  | -2.737196 | 0.376036  |
| 21 | 6 | 0 | 1.225076  | 3.179866  | 0.615351  |
| 22 | 6 | 0 | 1.006443  | 4.554751  | 0.529532  |
| 23 | 6 | 0 | 0.367488  | 5.215247  | 1.583206  |
| 24 | 1 | 0 | 1.342304  | 5.105700  | -0.342796 |
| 25 | 6 | 0 | 0.190783  | 3.114167  | 2.711542  |
| 26 | 6 | 0 | -0.047268 | 4.485873  | 2.696522  |
| 27 | 1 | 0 | 0.199493  | 6.286326  | 1.532142  |
| 28 | 1 | 0 | -0.108093 | 2.488218  | 3.548063  |
| 29 | 1 | 0 | -0.541639 | 4.962875  | 3.535267  |
| 30 | 7 | 0 | 2.897965  | -1.006433 | -0.323762 |
| 31 | 7 | 0 | 0.810996  | 2.491988  | 1.698432  |
| 32 | 6 | 0 | -0.787321 | 0.333530  | -1.969072 |
| 33 | 1 | 0 | -1.744713 | 0.637536  | -2.406854 |
| 34 | 1 | 0 | -0.304486 | -0.319280 | -2.701731 |
| 35 | 7 | 0 | -0.995678 | -0.463134 | -0.727006 |
| 36 | 6 | 0 | -1.376714 | -1.870830 | -1.034614 |
| 37 | 1 | 0 | -2.426427 | -1.941277 | -1.338027 |
| 38 | 1 | 0 | -0.773209 | -2.205755 | -1.886792 |
| 39 | 6 | 0 | -1.999550 | 0.185932  | 0.221782  |
| 40 | 1 | 0 | -1.979837 | -0.411010 | 1.137601  |
| 41 | 1 | 0 | -1.594196 | 1.169154  | 0.472553  |
| 42 | 6 | 0 | -3.417368 | 0.311978  | -0.288086 |
| 43 | 6 | 0 | -4.359409 | -0.695461 | -0.024675 |
| 44 | 6 | 0 | -3.829507 | 1.448861  | -1.001643 |
| 45 | 6 | 0 | -5.670406 | -0.583892 | -0.488941 |
| 46 | 1 | 0 | -4.074445 | -1.559796 | 0.570978  |
| 47 | 6 | 0 | -5.139715 | 1.561501  | -1.467902 |
| 48 | 1 | 0 | -3.133439 | 2.267355  | -1.171989 |
| 49 | 6 | 0 | -6.060065 | 0.541624  | -1.217755 |
| 50 | 1 | 0 | -6.390140 | -1.366455 | -0.270492 |
| 51 | 1 | 0 | -5.445658 | 2.448786  | -2.013067 |
| 52 | 1 | 0 | -7.081104 | 0.631606  | -1.574387 |
| 53 | 6 | 0 | -1.098525 | -2.778360 | 0.147571  |
| 54 | 6 | 0 | -1.843659 | -3.929429 | 0.395202  |
| 55 | 6 | 0 | -1.500414 | -4.740041 | 1.477828  |
| 56 | 1 | 0 | -2.677289 | -4.185106 | -0.250722 |

|    |   |   |           |           |          |
|----|---|---|-----------|-----------|----------|
| 57 | 6 | 0 | 0.257197  | -3.198253 | 1.993600 |
| 58 | 6 | 0 | -0.432438 | -4.366348 | 2.295333 |
| 59 | 1 | 0 | -2.065073 | -5.643142 | 1.686595 |
| 60 | 1 | 0 | 1.079098  | -2.856159 | 2.615645 |
| 61 | 1 | 0 | -0.143528 | -4.960289 | 3.155097 |
| 62 | 7 | 0 | -0.057930 | -2.424790 | 0.934443 |
| 63 | 1 | 0 | 0.982200  | 1.096652  | 1.766719 |
| 64 | 1 | 0 | 1.081259  | 0.174760  | 1.911483 |

-----  
**TS''<sub>c</sub>** (singlet) E(B3LYP/ SDD-6-31G(d,p))= -1444.77609959 hartree  
 -----

| Center<br>Number | Atomic<br>Number | Atomic<br>Type | Coordinates (Angstroms) |           |           |
|------------------|------------------|----------------|-------------------------|-----------|-----------|
|                  |                  |                | X                       | Y         | Z         |
| 1                | 7                | 0              | 1.162357                | 1.168220  | -1.175099 |
| 2                | 6                | 0              | 2.140013                | 0.562410  | -2.138928 |
| 3                | 1                | 0              | 1.612179                | -0.184361 | -2.745413 |
| 4                | 1                | 0              | 2.530623                | 1.311021  | -2.839672 |
| 5                | 6                | 0              | 1.794725                | 2.403281  | -0.605919 |
| 6                | 1                | 0              | 2.792245                | 2.124070  | -0.253894 |
| 7                | 1                | 0              | 1.929832                | 3.136057  | -1.411266 |
| 8                | 6                | 0              | -0.147829               | 1.506436  | -1.822893 |
| 9                | 1                | 0              | -0.641592               | 2.237415  | -1.179825 |
| 10               | 1                | 0              | 0.009243                | 1.986101  | -2.797597 |
| 11               | 26               | 0              | 0.851957                | -0.544130 | -0.044448 |
| 12               | 6                | 0              | 3.261117                | -0.089396 | -1.352124 |
| 13               | 6                | 0              | 4.580622                | -0.115322 | -1.789640 |
| 14               | 6                | 0              | 3.822112                | -1.198773 | 0.610555  |
| 15               | 6                | 0              | 5.547389                | -0.723684 | -0.986025 |
| 16               | 1                | 0              | 4.849285                | 0.338235  | -2.738118 |
| 17               | 6                | 0              | 5.161823                | -1.262691 | 0.240566  |
| 18               | 1                | 0              | 3.492077                | -1.591359 | 1.564464  |
| 19               | 1                | 0              | 6.583871                | -0.759039 | -1.305606 |
| 20               | 1                | 0              | 5.882821                | -1.722621 | 0.907002  |
| 21               | 6                | 0              | 1.049019                | 3.058283  | 0.536691  |
| 22               | 6                | 0              | 0.909084                | 4.443793  | 0.614753  |
| 23               | 6                | 0              | 0.313899                | 5.003445  | 1.748510  |
| 24               | 1                | 0              | 1.268721                | 5.076294  | -0.190392 |
| 25               | 6                | 0              | 0.021485                | 2.791002  | 2.612661  |
| 26               | 6                | 0              | -0.136020               | 4.165669  | 2.768853  |
| 27               | 1                | 0              | 0.203455                | 6.080054  | 1.830526  |
| 28               | 1                | 0              | -0.316860               | 2.087745  | 3.368780  |
| 29               | 1                | 0              | -0.600805               | 4.562843  | 3.664256  |
| 30               | 7                | 0              | 2.876789                | -0.642636 | -0.171622 |

|    |   |   |           |           |           |
|----|---|---|-----------|-----------|-----------|
| 31 | 7 | 0 | 0.602829  | 2.263393  | 1.525042  |
| 32 | 6 | 0 | -1.021807 | 0.266100  | -1.980169 |
| 33 | 1 | 0 | -2.019222 | 0.549578  | -2.332958 |
| 34 | 1 | 0 | -0.600941 | -0.398632 | -2.740852 |
| 35 | 7 | 0 | -1.093814 | -0.500938 | -0.695347 |
| 36 | 6 | 0 | -1.438576 | -1.935049 | -0.953403 |
| 37 | 1 | 0 | -2.519897 | -2.076406 | -1.037741 |
| 38 | 1 | 0 | -1.008187 | -2.224113 | -1.919481 |
| 39 | 6 | 0 | -2.064742 | 0.115582  | 0.308783  |
| 40 | 1 | 0 | -1.953666 | -0.480159 | 1.218336  |
| 41 | 1 | 0 | -1.681211 | 1.113550  | 0.527602  |
| 42 | 6 | 0 | -3.514803 | 0.184508  | -0.109172 |
| 43 | 6 | 0 | -4.405408 | -0.847630 | 0.228587  |
| 44 | 6 | 0 | -4.010966 | 1.299403  | -0.804717 |
| 45 | 6 | 0 | -5.747274 | -0.783472 | -0.148526 |
| 46 | 1 | 0 | -4.055512 | -1.692981 | 0.817149  |
| 47 | 6 | 0 | -5.351922 | 1.364914  | -1.184093 |
| 48 | 1 | 0 | -3.354932 | 2.138668  | -1.026688 |
| 49 | 6 | 0 | -6.220082 | 0.319367  | -0.862621 |
| 50 | 1 | 0 | -6.425570 | -1.584835 | 0.126747  |
| 51 | 1 | 0 | -5.722188 | 2.235475  | -1.716167 |
| 52 | 1 | 0 | -7.264863 | 0.372569  | -1.151442 |
| 53 | 6 | 0 | -0.842970 | -2.807377 | 0.122761  |
| 54 | 6 | 0 | -1.418256 | -4.011345 | 0.519794  |
| 55 | 6 | 0 | -0.776473 | -4.786906 | 1.485051  |
| 56 | 1 | 0 | -2.354467 | -4.333734 | 0.076188  |
| 57 | 6 | 0 | 0.929102  | -3.107242 | 1.593952  |
| 58 | 6 | 0 | 0.418234  | -4.321872 | 2.034646  |
| 59 | 1 | 0 | -1.205623 | -5.729743 | 1.808429  |
| 60 | 1 | 0 | 1.843601  | -2.708941 | 2.013883  |
| 61 | 1 | 0 | 0.946510  | -4.883296 | 2.796924  |
| 62 | 7 | 0 | 0.326478  | -2.359596 | 0.646546  |
| 63 | 1 | 0 | 0.693245  | 0.800364  | 1.328652  |
| 64 | 1 | 0 | 0.705495  | -0.092144 | 1.459572  |

-----

$TS''_c$  (triplet) E(B3LYP/ SDD-6-31G(d,p))= -1444.79259113 hartree

-----

| Center<br>Number | Atomic<br>Number | Atomic<br>Type | Coordinates (Angstroms) |          |           |
|------------------|------------------|----------------|-------------------------|----------|-----------|
|                  |                  |                | X                       | Y        | Z         |
| 1                | 7                | 0              | 1.240369                | 1.223718 | -1.046448 |
| 2                | 6                | 0              | 2.196931                | 0.676184 | -2.069859 |
| 3                | 1                | 0              | 1.624299                | 0.078945 | -2.785847 |

|    |    |   |           |           |           |
|----|----|---|-----------|-----------|-----------|
| 4  | 1  | 0 | 2.660584  | 1.489077  | -2.640926 |
| 5  | 6  | 0 | 1.887726  | 2.455076  | -0.472095 |
| 6  | 1  | 0 | 2.839549  | 2.133444  | -0.036905 |
| 7  | 1  | 0 | 2.122303  | 3.143723  | -1.292762 |
| 8  | 6  | 0 | -0.067202 | 1.558785  | -1.705312 |
| 9  | 1  | 0 | -0.608193 | 2.229309  | -1.034606 |
| 10 | 1  | 0 | 0.097954  | 2.104834  | -2.643537 |
| 11 | 26 | 0 | 0.852386  | -0.442213 | 0.216121  |
| 12 | 6  | 0 | 3.234462  | -0.212422 | -1.432834 |
| 13 | 6  | 0 | 4.543979  | -0.309709 | -1.892464 |
| 14 | 6  | 0 | 3.603362  | -1.861942 | 0.162103  |
| 15 | 6  | 0 | 5.402984  | -1.231219 | -1.289416 |
| 16 | 1  | 0 | 4.885559  | 0.317851  | -2.708988 |
| 17 | 6  | 0 | 4.923515  | -2.022648 | -0.246039 |
| 18 | 1  | 0 | 3.190675  | -2.455370 | 0.969996  |
| 19 | 1  | 0 | 6.429092  | -1.327481 | -1.629568 |
| 20 | 1  | 0 | 5.557052  | -2.751035 | 0.247385  |
| 21 | 6  | 0 | 1.106039  | 3.234462  | 0.566951  |
| 22 | 6  | 0 | 0.867663  | 4.600882  | 0.427870  |
| 23 | 6  | 0 | 0.240298  | 5.296141  | 1.466696  |
| 24 | 1  | 0 | 1.180215  | 5.119586  | -0.472437 |
| 25 | 6  | 0 | 0.110778  | 3.244330  | 2.690245  |
| 26 | 6  | 0 | -0.143913 | 4.610962  | 2.619090  |
| 27 | 1  | 0 | 0.057634  | 6.362041  | 1.374208  |
| 28 | 1  | 0 | -0.162256 | 2.646611  | 3.555114  |
| 29 | 1  | 0 | -0.627532 | 5.118909  | 3.445823  |
| 30 | 7  | 0 | 2.771069  | -0.973914 | -0.415266 |
| 31 | 7  | 0 | 0.720972  | 2.595588  | 1.688344  |
| 32 | 6  | 0 | -0.890655 | 0.297250  | -1.964891 |
| 33 | 1  | 0 | -1.875562 | 0.567115  | -2.360796 |
| 34 | 1  | 0 | -0.411465 | -0.333016 | -2.718604 |
| 35 | 7  | 0 | -1.003496 | -0.496330 | -0.707910 |
| 36 | 6  | 0 | -1.213636 | -1.956824 | -0.943761 |
| 37 | 1  | 0 | -2.253400 | -2.179946 | -1.203847 |
| 38 | 1  | 0 | -0.593604 | -2.254250 | -1.797634 |
| 39 | 6  | 0 | -2.063702 | 0.066012  | 0.239503  |
| 40 | 1  | 0 | -1.980888 | -0.512370 | 1.162682  |
| 41 | 1  | 0 | -1.755333 | 1.087459  | 0.474251  |
| 42 | 6  | 0 | -3.485615 | 0.048362  | -0.271898 |
| 43 | 6  | 0 | -4.322428 | -1.050166 | -0.016992 |
| 44 | 6  | 0 | -4.009951 | 1.145135  | -0.974892 |
| 45 | 6  | 0 | -5.637871 | -1.066090 | -0.481706 |
| 46 | 1  | 0 | -3.954512 | -1.885200 | 0.574941  |
| 47 | 6  | 0 | -5.324870 | 1.130643  | -1.441010 |

|    |   |   |           |           |           |
|----|---|---|-----------|-----------|-----------|
| 48 | 1 | 0 | -3.399270 | 2.031271  | -1.135286 |
| 49 | 6 | 0 | -6.138214 | 0.021265  | -1.200938 |
| 50 | 1 | 0 | -6.276014 | -1.918197 | -0.270157 |
| 51 | 1 | 0 | -5.718409 | 1.988177  | -1.977480 |
| 52 | 1 | 0 | -7.163307 | 0.011900  | -1.557146 |
| 53 | 6 | 0 | -0.778110 | -2.724236 | 0.287066  |
| 54 | 6 | 0 | -1.344262 | -3.936517 | 0.671258  |
| 55 | 6 | 0 | -0.869505 | -4.576391 | 1.817378  |
| 56 | 1 | 0 | -2.146091 | -4.369629 | 0.082346  |
| 57 | 6 | 0 | 0.661106  | -2.757434 | 2.125035  |
| 58 | 6 | 0 | 0.144944  | -3.972130 | 2.561292  |
| 59 | 1 | 0 | -1.296009 | -5.523258 | 2.132572  |
| 60 | 1 | 0 | 1.432530  | -2.235426 | 2.681419  |
| 61 | 1 | 0 | 0.526071  | -4.425252 | 3.469515  |
| 62 | 7 | 0 | 0.225411  | -2.151942 | 1.001125  |
| 63 | 1 | 0 | 0.910855  | 1.294367  | 1.710798  |
| 64 | 1 | 0 | 1.062045  | 0.316956  | 1.745134  |

---
